# Supplementary material for: RNA polymerase III is involved in regulating Plasmodium falciparum virulence
Source: eLife journal article supplement (doi:10.7554/elife.95879), 2024-02-28

1 cycle without Shield

+S   -S

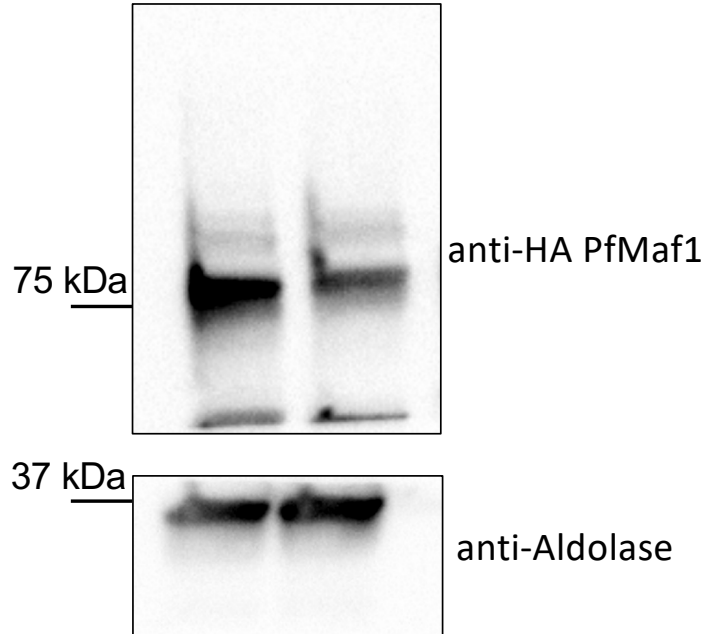

3 cycles without Shield

+S   -S

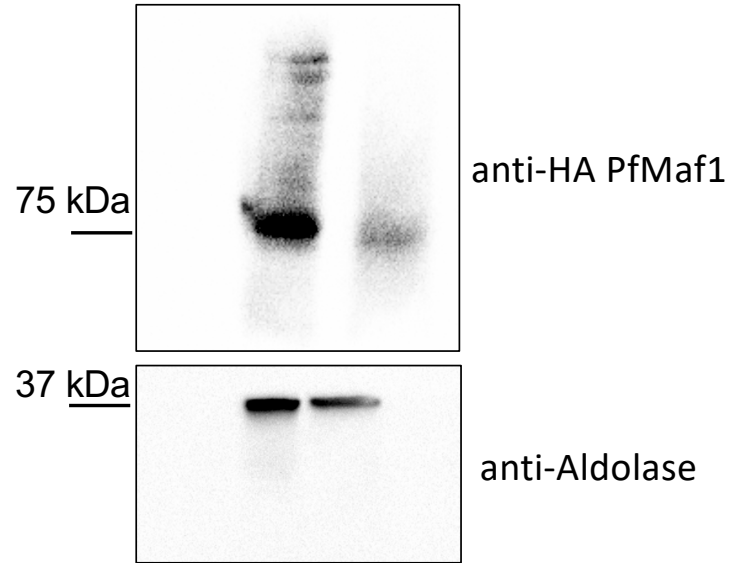

Supplement: fig3-data1 [file elife-95879-fig3-data1-v1.pdf]
