# Supplementary material for: RNA polymerase III is involved in regulating Plasmodium falciparum virulence
Source: eLife journal article supplement (doi:10.7554/elife.95879), 2024-02-28

2 cycles without Shield

anti-Aldolase

+S -S

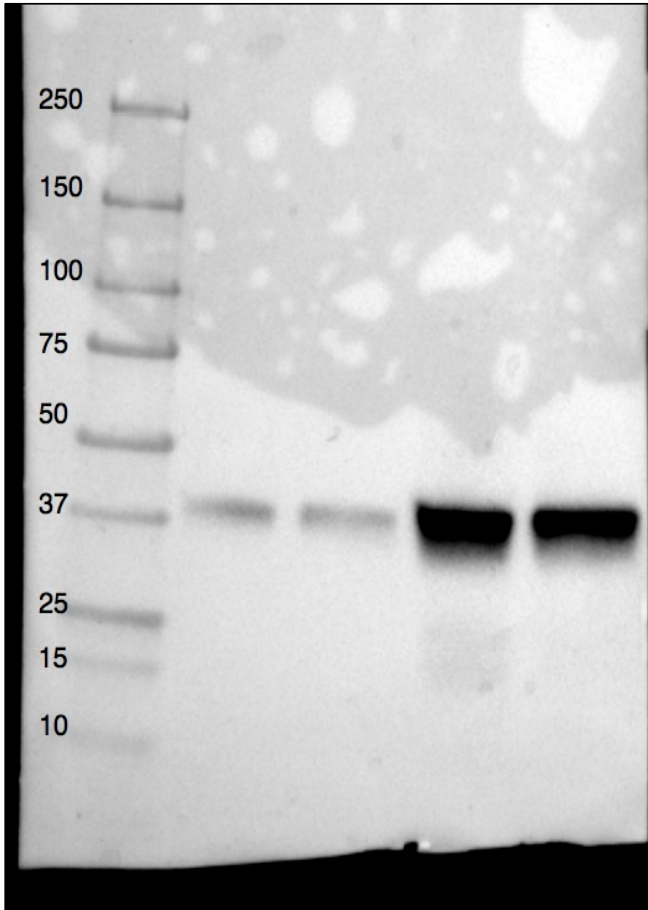

anti-HA PfMaf1

+S -S

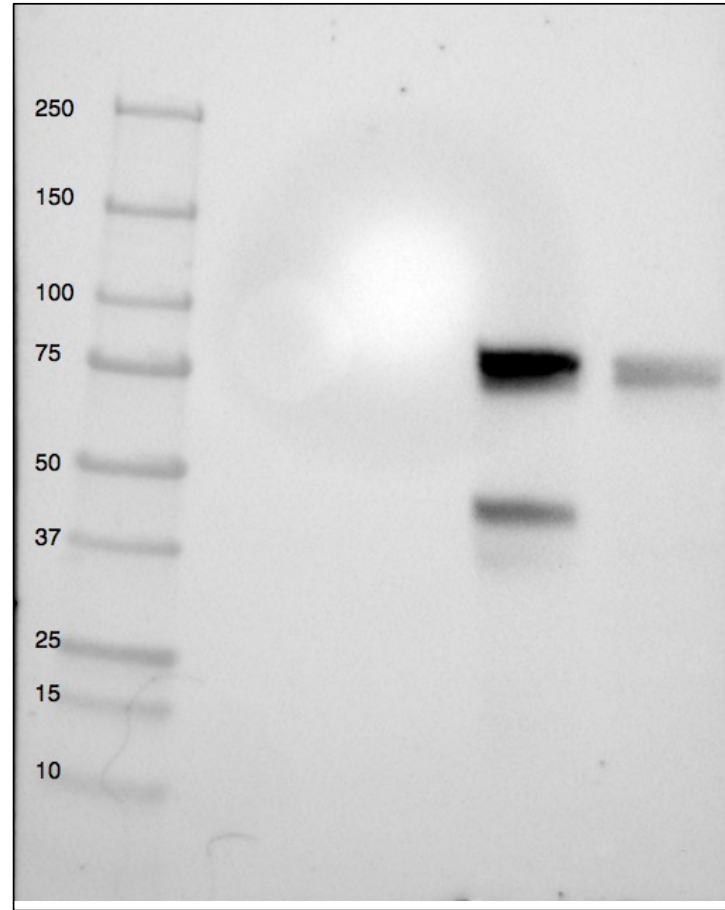

Supplement: fig3-data2 [file elife-95879-fig3-data2-v1.pdf]
