# Supplementary material for: RNA polymerase III is involved in regulating Plasmodium falciparum virulence
Source: eLife journal article supplement (doi:10.7554/elife.95879), 2024-02-28
Supplement: fig4-data1 [file elife-95879-fig4-data1-v1.pdf]

# IP-WB Maf1 +/- MgCl<sub>2</sub>

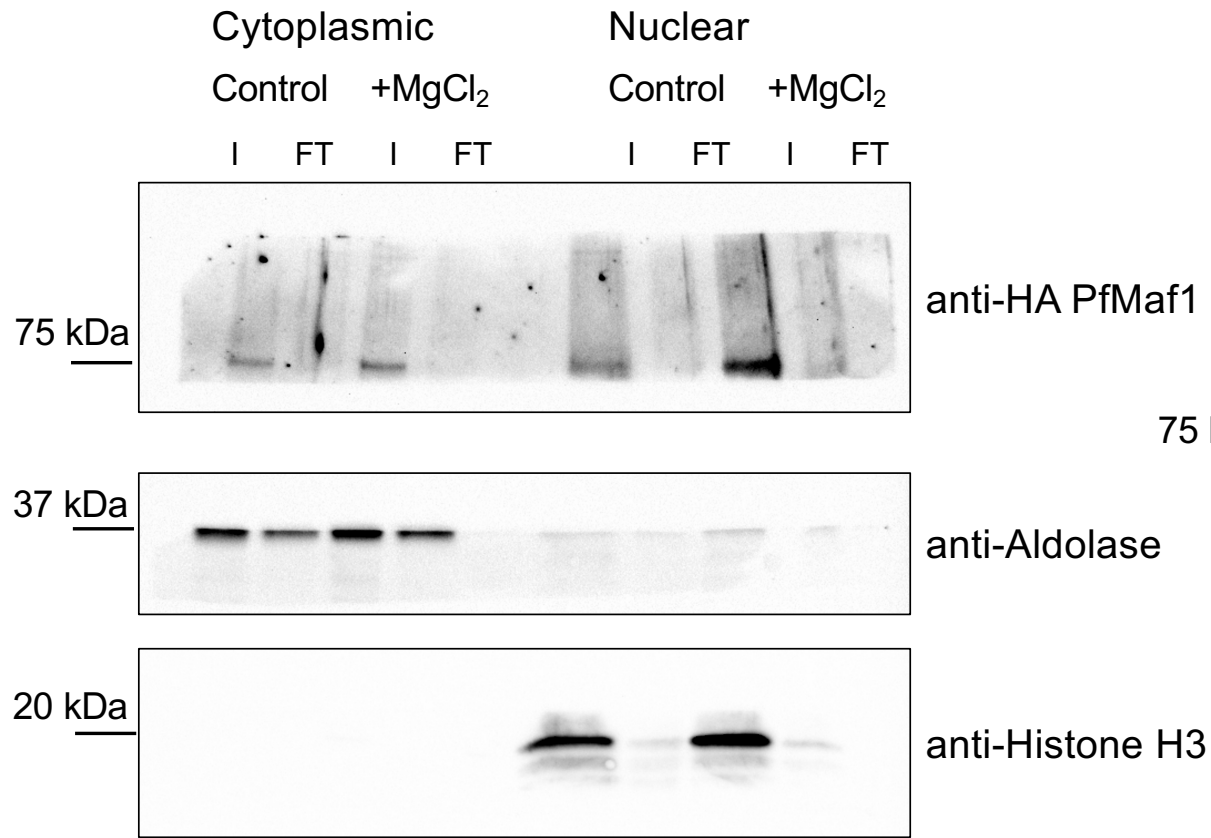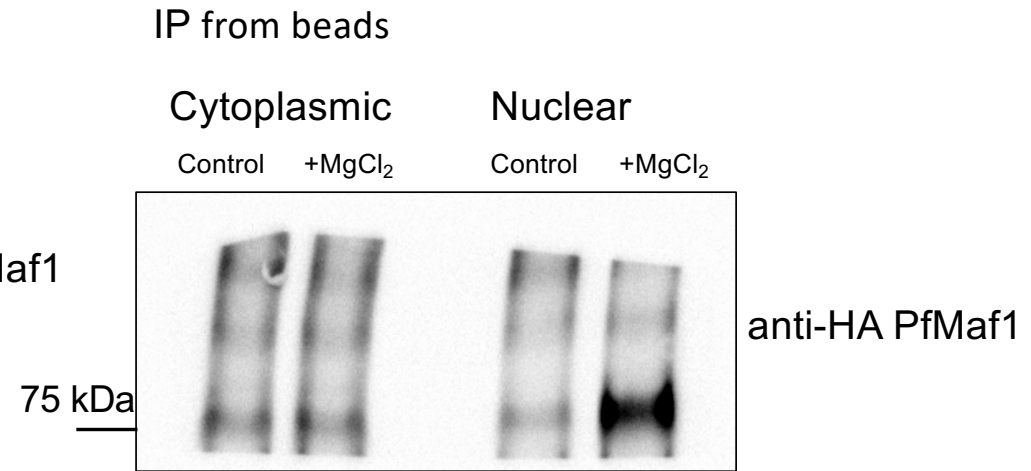

I: Input  
FT: Flow through
