# Supplementary material for: RNA polymerase III is involved in regulating Plasmodium falciparum virulence
Source: eLife journal article supplement (doi:10.7554/elife.95879), 2024-02-28

# Cytoadhesion binding assay membrane WB

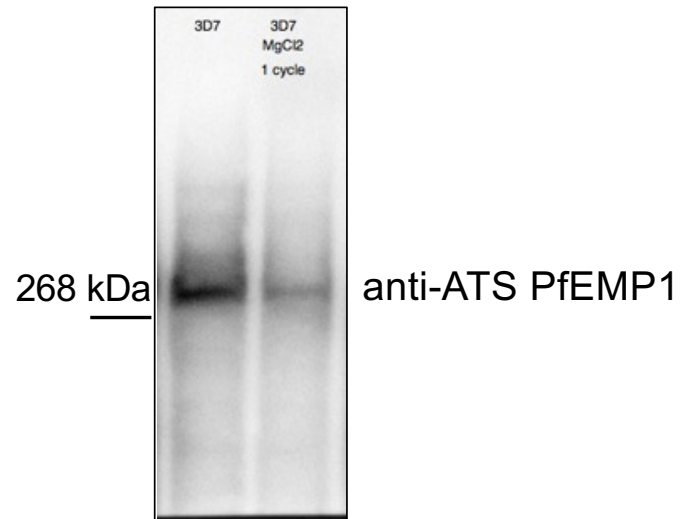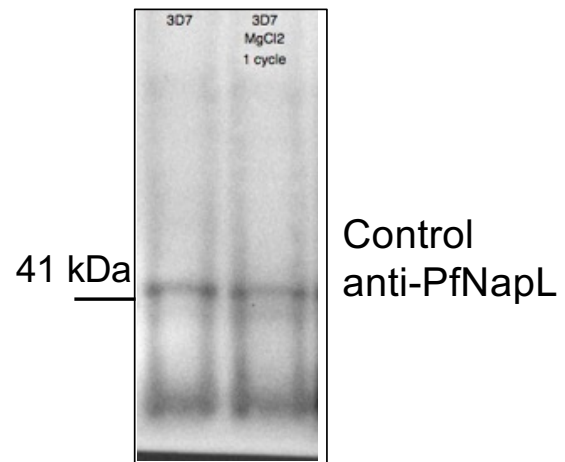

Supplement: fig4-data2 [file elife-95879-fig4-data2-v1.pdf]
