# Supplementary material for: RNA polymerase III is involved in regulating Plasmodium falciparum virulence
Source: eLife. 2024 Jun 26;13:RP95879. doi: 10.7554/eLife.95879 (PMC11208047; doi:10.7554/eLife.95879)
Supplement: Figure 1—source data 1. [file elife-95879-fig1-data1.xlsx]

## Sheet: Figure 1-source data
Figure 1-source data RT-qPCR used in analysis
RT-qPCR values for wet symptomatic and dry asymptomatic samples. P. falciparum steady state levels of RNA were analyzed from venous blood samples taken from individuals with asymptomatic parasitemia during the dry season (n = 17+), as well as mildly symptomatic malaria infections during the wet season (n = 14+) in The Gambia (Collins et al, 2022; Fogang et al, 2023). Expression was normalized to …

## Sheet: Figure 1-source data RT-qPCR
Figure 1 source data: RT-qPCR
	gene	Wet symptomatic														gene	Dry asymptomatic
	Asparagine tRNA	1.39	6.50667	2.64333	0.05633	1.05667	7.15667	9.26333	0.07633	10.7333	0.10963	0.24967				Asparagine tRNA	2.345	0.2975	0.623	0.138	0.0338	0.0646	0.0213	0.0214	0.0139	0.2367	0.0166	0.0387
	Valine tRNA	0.01483	0.37433	0.109	0.00047	0.00568	0.13467	0.16633	0.00112	0.18433	0.00011	0.00195	0.084	0.912	0.366	Valine tRNA	0.0639	0.0013	0.0036	0.0011	0.0003	0.0001	0.0002	0.0001	0.0002	0.0015	0.0002	0.0002	0.0434	0.0024	0.00875	0.0149333	0.0233
	RUF6	0.00205	0.01456	0.00834	4e-05	0.00013	0.01368	0.01485	0.00013	0.03157	7e-05	0.00058	0.01205	0.0658667	0.04035	RUF6	0.0008	0.0001	0.0019	0.0001	0	0.001	0	0	0.0001	0.0007	0	0.0013	0.00371	0.002535	0.001635	0.00414	0.0144
	DBLalpha	0.00186	0.03405	0.1078		0.00027	0.0275	0.0662	8e-05	0.138		0.00062	0.0539333	0.359	0.464667	DBLalpha	0.0173	0.001	0.0049	0.0007	0	0.0003	0.0001		0	0.0081	0	0.0002	0.0506	0.004355	0.01115	0.01515	0.111667
