# Supplementary material for: RNA polymerase III is involved in regulating Plasmodium falciparum virulence
Source: eLife. 2024 Jun 26;13:RP95879. doi: 10.7554/eLife.95879 (PMC11208047; doi:10.7554/eLife.95879)
Supplement: Figure 2—source data 1. [file elife-95879-fig2-data1.xlsx]

## Sheet: Figure 2-source data
Figure 2-source data RNA-seq analysis for control and MgCl2 supplemented cultured parasites.
RNA-seq analysis values for control and MgCl2 supplemented cultured parasites during two time points of the asexual blood stage parasites (ring and trophozoite). Gene type, gene ID and product description is provided as well as values for each of the 3 biological replicates. Genes with an FDR < 0.05 are shown in the first two tabs. All genes including logFC, logCPM, LR, PValue, and FDR are shown …

## Sheet: 12hpi down- and up-regulated
12hpi down- and up-regulated genes with FDR < 0.05
Gene Type	Gene ID	Product Description	A-box consensus	B-box consensus	B and/or A box	TATA box	logFC	Control_1	Control_2	Control_3	Mg_1	Mg_2	Mg_3
protein coding gene	PF3D7_1405600	ribonucleoside-diphosphate reductase small chain, putative	2 (direct)	1 (direct)	X	X	-1.78315917752548	211.326	27.3015	130.917	3.16642	24.3708	78.095
ncRNA gene	PF3D7_1240800	Plasmodium RNA of unknown function RUF6	1 (direct)	1 direct	X		-1.84433140552928	14114.8	5228.66	6037.99	2530.84	2969.87	1565.28
ncRNA gene	PF3D7_0711600	Plasmodium RNA of unknown function RUF6	1 (direct)	1 direct	X		-1.86003752457614	5326.23	2401.76	1415.54	868.531	1035.23	612.059
ncRNA gene	PF3D7_0711800	Plasmodium RNA of unknown function RUF6	1 (direct)	1 direct	X		-1.91571277275568	4736.76	2626	1543.67	902.244	858.211	596.031
ncRNA gene	PF3D7_0712700	Plasmodium RNA of unknown function RUF6	1 (direct)	1 direct	X		-1.95958974850635	8056.06	3576.07	3623.73	1600.85	1454.45	862.865
ncRNA gene	PF3D7_0413000	Plasmodium RNA of unknown function RUF6	1 (direct)	1 direct	X		-1.97434750848835	32385	12555.6	10205.1	5266.38	5674.94	3088.44
ncRNA gene	PF3D7_0412800	Plasmodium RNA of unknown function RUF6	1 (direct)	1 direct	X		-1.99947124953295	32621.9	13159.7	9979.74	5218.25	5773.74	2950.27
ncRNA gene	PF3D7_1341100	U6 spliceosomal RNA	0	0			-2.00244197325592	159939	154806	122027	20888.7	50946.8	37185.5
ncRNA gene	PF3D7_0412500	Plasmodium RNA of unknown function RUF6	1 (direct)	1 direct	X		-2.00576229305227	4300.48	2123.05	1423.44	810.727	661.551	476.235
ncRNA gene	PF3D7_0421400	Plasmodium RNA of unknown function RUF6	1 (direct)	1 direct	X		-2.09030980100035	3319.19	1220.68	926.767	506.722	472.735	298.984
ncRNA gene	PF3D7_0421000	Plasmodium RNA of unknown function RUF6	1 (direct)	1 direct	X		-2.15386033918547	2145.75	910.321	518.233	272.369	306.78	218.929
ncRNA gene	PF3D7_1240500	Plasmodium RNA of unknown function RUF6	1 (direct)	1 direct	X		-2.16353166556363	6829.12	2546.04	2213.67	972.577	993.173	617.309
ncRNA gene	PF3D7_0808500	Plasmodium RNA of unknown function RUF6	1 (direct)	1 direct	X		-2.16699113505756	3170.73	1186.35	859.315	422.541	510.141	228.201
ncRNA gene	PF3D7_0809000	Plasmodium RNA of unknown function RUF6	1 (direct)	1 direct	X		-2.18443645588409	2963.86	1125.12	832.874	404.916	446.373	228.681
ncRNA gene	PF3D7_0420800	Plasmodium RNA of unknown function RUF6	1 (direct)	1 direct	X		-2.2135572682073	2486.8	900.093	673.703	411.876	187.477	257.771
ncRNA gene	PF3D7_0712100	Plasmodium RNA of unknown function RUF6	1 (direct)	1 direct	X		-2.21596305443979	3315.73	1316.63	1525.3	447.588	622.505	257.946
protein coding gene	PF3D7_1372600	rifin	2 (direct)	0	X	X	-2.31657926240464	36.5125	35.8702	21.1432	11.5333	3.5507	2.94259
ncRNA gene	PF3D7_1130300	small nucleolar RNA snoR13	0	0			-2.50176412536109	215.307	222.13	163.584	20.1308	51.6465	39.2345
protein coding gene	PF3D7_1363400	polyubiquitin binding protein, putative	2 (reverse	0	X	X	-2.67123494998718	2.00215	2.34182	4.33534	0.818987	0.600329	0
ncRNA gene	PF3D7_0620800	tRNA Alanine	1 (direct)	1 (direct)	X		-2.68036530753138	100.072	108.046	127.733	18.7131	0	24.867
ncRNA gene	PF3D7_1424300	small nucleolar RNA snoR26	0	0			-2.68062484670082	403.871	199.183	197.747	76.9207	0	29.7356
ncRNA gene	PF3D7_1241000	Plasmodium RNA of unknown function RUF6	1 (direct)	1 direct	X		-2.70941638132375	5964.17	2493.62	1640.76	671.589	559.818	309.294
ncRNA gene	PF3D7_1244300	ACEA small nucleolar RNA U3	0	0			-2.85452243856799	3095.6	2402.17	1050.98	423.122	212.158	265.199
ncRNA gene	PF3D7_1424900	small nucleolar RNA snoR30	0	0			-2.91315890835163	192.031	69.1103	70.0315	8.97723	0	23.8588
ncRNA gene	PF3D7_0714700	tRNA Asparagine	1 (direct)	1 (direct)	X		-3.14726192667902	80.058	244.904	218.972	14.0348	0	39.7871
protein coding gene	PF3D7_1322900	conserved protein, unknown function	1 (direct)	0	X	X	-3.34840566025215	41.1542	45.5222	18.7606	3.67807	3.2664	3.30853
protein coding gene	PF3D7_1014500	conserved Plasmodium protein, unknown function	1 (direct)	0	X	X	-3.35812892602905	1.09338	0.65583	1.82757	0.0851905	0	0.181129
protein coding gene	PF3D7_1405000	conserved Plasmodium protein, unknown function	1 (direct)	0	X	X	-3.37131338002048	2.1257	1.53004	1.69579	0.372653	0	0
protein coding gene	PF3D7_0723000	tRNAHis guanylyltransferase, putative	0	0		X	-3.414343453389	0	4.55098	5.04398	0	0	0.785563
protein coding gene	PF3D7_0207800	serine repeat antigen 3	1 (direct) 2207-2217	1 (direct) 2242-2250	X	X	-3.4172689331114	0.863323	0.776757	1.37744	0	0	0.214527
ncRNA gene	PF3D7_0527700	tRNA Glutamic acid	1 (direct)	1 (direct)	X		-3.5219745493031	78.946	241.502	71.9768	0	0	29.4259
ncRNA gene	PF3D7_1425000	Plasmodium RNA of unknown function RUF4	0	0		X	-3.62143824815738	481.986	146.546	143.954	44.6762	0	8.2599
protein coding gene	PF3D7_1206800	conserved Plasmodium protein, unknown function	3 (2 direct 1 reverse)	0	X	X	-4.39702415216861	5.20762	1.63991	2.96743	0.304313	0	0
protein coding gene	PF3D7_1476300	Plasmodium exported protein (PHISTb), unknown function	3 direct)	0	X	X	-5.64856125283752	1.54292	1.38821	0	0	0	0
protein coding gene	PF3D7_0521400	conserved protein, unknown function	0	0		X	-5.74404682721667	0	1.81783	0.767525	0	0	0
ncRNA gene	PF3D7_1252000	tRNA Glutamine	1 (direct)	1 (direct)	X		-5.78144135943249	80.058	14.4061	9.12382	0	0	0
protein coding gene	PF3D7_0934300	ATP synthase-associated protein, putative	0	0		X	-5.81371572235457	13.0071	0	4.44708	0	0	0
protein coding gene	PF3D7_0928700	conserved Plasmodium protein, unknown function	0	1 (direct)	X	X	-5.85303380225521	0.630867	0.454088	0.287588	0	0	0
protein coding gene	PF3D7_1360300	conserved Plasmodium protein, unknown function	2 (1 direct 1 reverse)	0	X	X	-5.88277634727421	2.54209	0.914877	2.31768	0	0	0
protein coding gene	PF3D7_0618600	rhomboid protease ROM10	1 (direct)	0	X	X	-5.90337250795598	4.59632	0	0.349213	0	0	0
protein coding gene	PF3D7_0112200	multidrug resistance-associated protein 1	5(3 direct 2 reverse)	0	X	X	-5.95536669428508	0	0.280587	0.710817	0	0	0
protein coding gene	PF3D7_1208000	ribosomal protein L29, apicoplast, putative	1 (direct)	0	X	X	-6.03374025663536	5.639	3.04415	5.1412	0	0	0
protein coding gene	PF3D7_1143200	DnaJ protein, putative	1 (direct)	0	X	X	-6.07620297773644	2.56967	0	4.09994	0	0	0
protein coding gene	PF3D7_1116100	serine esterase, putative	5 (4 direct 1 reverse)	1 direct	X	X	-6.09231355036959	0	0.372481	0.70771	0	0	0
protein coding gene	PF3D7_1222000	tRNA-splicing ligase RtcB, putative	0	0		X	-6.10349982512013	0.831497	1.79549	1.13714	0	0	0
ncRNA gene	PF3D7_1369900	tRNA Tryptophan	1 (direct)	1 (direct)	X		-6.15511163796929	40.029	36.0152	27.3714	0	0	0
protein coding gene	PF3D7_0904500	prefoldin subunit 4, putative	0	0		X	-6.17812433415041	0	7.69047	3.65296	0	0	0
protein coding gene	PF3D7_0209000	6-cysteine protein P230	7 (5 direct 2 reverse)	0	X	X	-6.27423482795403	0.604243	0.108731	0.275451	0	0	0
protein coding gene	PF3D7_1105200	WD repeat-containing protein WRAP73, putative	3 (direct)	0	X	X	-6.39253141108921	1.99093	0.53739	0.907588	0	0	0
ncRNA gene	PF3D7_1103200	tRNA Glycine	1 (direct)	1 (direct)	X		-6.44441572311515	0	42.618	62.9797	0	0	0
protein coding gene	PF3D7_0625800	conserved Plasmodium protein, unknown function	0	0		X	-6.74358242903114	0	1.59155	3.35991	0	0	0
protein coding gene	PF3D7_1469500	conserved Plasmodium protein, unknown function	3 (2 direct 1 reverse)	0	X	X	-6.83314845259476	2.06645	1.7353	1.88403	0	0	0
protein coding gene	PF3D7_0918100	cytochrome b5-like heme/steroid binding protein, putative	0	0		X	2.08530065780754	3.23697	9.31966	4.91869	25.7252	29.1173	24.1306
protein coding gene	PF3D7_0513100	conserved protein, unknown function	0	0		X	2.8237969427393	0	0	3.32883	8.53437	10.5098	7.98401
protein coding gene	PF3D7_1021600	deoxyribose-phosphate aldolase, putative	0	0		X	3.26237963579105	0	1.29309	0	9.23827	2.15466	5.35693
protein coding gene	PF3D7_0805200	gamete release protein, putative	1 (reverse)	0	X	X	3.42287051731301	0	3.63997	0	7.09233	42.4567	13.8228
protein coding gene	PF3D7_1147400	conserved Plasmodium protein, unknown function	0	0		X	4.4634427423887	0	1.01876	0	13.2334	16.9754	6.33067
protein coding gene	PF3D7_1035700	duffy binding-like merozoite surface protein	3 (2 direct 1 reverse)	1 direct	X	X	6.15597460848341	0	0	0	0.634797	0	2.36194
protein coding gene	PF3D7_1140400	conserved Plasmodium protein, unknown function	1 (reverse)	0	X	X	6.21932607013835	0	0	0	3.30505	5.65285	4.09913
protein coding gene	PF3D7_0719100	ATP synthase F0 subunit a-like protein, putative	1 (direct)	0	X	X	6.29407685305828	0	0	0	1.92741	4.94488	1.7075
protein coding gene	PF3D7_0522500	50S ribosomal protein L17, apicoplast, putative	2 (direct strand)	0	X	X	6.32912428173842	0	0	0	2.88474	7.40095	1.31431
protein coding gene	PF3D7_1433600	signal peptidase complex subunit SPC1, putative	0	0		X	6.34102711870911	0	0	0	1.10719	7.10139	6.4737
protein coding gene	PF3D7_0103800	actin-related protein ARP1, putative	2 (one each strand)	0	X	X	6.42067268919606	0	0	0	1.51394	0.776816	1.44849
protein coding gene	PF3D7_0423800	cysteine-rich protective antigen	0	0		X	6.47880648967409	0	0	0	2.7983	0	3.86726
			64 total: 52 down-regulated, 12 up-regulated
			12/52 down-regulated do not have B and/or A box		77% have B and/or A box
			6/12 up-regulated do not have B and/or A box		50% have B/and or A box
			72% (46/64) have B and/or A box

## Sheet: 24hpi down-regulated
24hpi downregulated genes with FDR < 0.05
Gene Type	genes	Product description	A-box consensus	B-box consensus	B and/or A box	TATA box	logFC	Control_1	Control_2	Control_3	Mg_1	Mg_2	Mg_3
protein coding gene	PF3D7_0515500	gametogenesis essential protein 1, putative	3 (2 direct 1 reverse)	0	X	X	-5.39111	0.236736	0.56611	0.425013	0	0	0
ncRNA gene	PF3D7_1138900	unspecified product	1 (direct)	0	X		-5.89941	1.25028	0.597963	0.224464	0	0	0
ncRNA gene	PF3D7_0730600	tRNA Valine	1 (direct)	1 (direct)	X		-5.81083	81.6606	0	3.49062	0	0	0
protein coding gene	PF3D7_1145600	conserved protein, unknown function	0	0		X	-5.722	1.36607	1.40002	0.350359	0	0	0
ncRNA gene	PF3D7_1438200	tRNA Selenocysteine	0	1 (direct)	X		-5.3699	8.07632	57.9391	4.02763	0	0	0
protein coding gene	PF3D7_1136100	conserved Plasmodium protein, unknown function	0	0		X	-5.32171	1.3937	0	0.602363	0	0	0
protein coding gene	PF3D7_1362900	conserved Plasmodium protein, unknown function	0	0		X	-5.29378	0	0	0.441522	0	0	0
protein coding gene	PF3D7_0215900	palmitoyltransferase DHHC11, putative	1 (reverse)	1 (direct)	X	X	-5.15358	0.655518	0	0.740984	0	0	0
protein coding gene	PF3D7_0923700	conserved protein, unknown function	0	2 (1 direct 1 reverse)	X	X	-5.11624	1.73684	1.66134	0.415756	0	0	0
protein coding gene	PF3D7_1035900	probable protein, unknown function	0	0		X	-5.09514	0.988162	1.1815	0.394234	0	0	0
ncRNA gene	PF3D7_1103200	tRNA Glycine	1 (direct)	1 (direct)	X		-3.98956	186.653	83.6899	13.9625	0	13.5151	0
ncRNA gene	PF3D7_0714700	tRNA Asparagine	1 (direct)	1 (direct)	X		-3.5259	118.301	113.158	3.53978	0	6.85273	7.66656
ncRNA gene	PF3D7_1241000	Plasmodium RNA of unknown function RUF6	1 (direct)	1 (direct)	X		-3.06189	151863	54560.9	9905.61	12372	10785.7	2789.17
protein coding gene	PF3D7_1322900	conserved Plasmodium protein, unknown function	1 (direct)	0	X	X	-2.78781	13.9513	8.98205	2.28347	1.22586	1.13969	1.15913
ncRNA gene	PF3D7_0730700	tRNA Threonine	2 (1 direct 1 reverse)	1 (direct)	X		-2.63555	153.791	84.8686	9.43941	0	20.5582	11.4998
ncRNA gene	PF3D7_0621600	tRNA Serine	1 (direct)	1 (direct)	X		-2.58881	285.164	49.594	25.8564	17.7673	33.0369	6.72007
ncRNA gene	PF3D7_0712100	Plasmodium RNA of unknown function RUF6	1 (direct)	1 (direct)	X		-2.46636	6677.8	2542.75	557.904	717.026	833.336	220.046
ncRNA gene	PF3D7_1213100	U1 spliceosomal RNA	0	0			-2.41435	1.51041e+06	713549	175288	223341	148403	79030.7
ncRNA gene	PF3D7_0308400	U4 spliceosomal RNA	0	0			-2.32101	54474.9	19992	3334.66	5729.18	7252.8	2606.3
ncRNA gene	PF3D7_0601800	H/ACA snoRNA	0	1 (direct)	X		-2.30943	3192.54	1441.33	349.062	463.062	421.221	120.961
ncRNA gene	PF3D7_0808500	Plasmodium RNA of unknown function RUF6	1 (direct)	1 (direct)	X		-2.27442	14430.4	5991.51	1674.93	1987.4	1754.21	831.3
ncRNA gene	PF3D7_1251900	tRNA Valine	1 (direct)	1 (direct)	X		-2.26315	1114.08	390.553	147.769	109.935	155.424	75.6008
ncRNA gene	PF3D7_0711800	Plasmodium RNA of unknown function RUF6	1 (direct)	1 (direct)	X		-2.25188	18365.4	7086.93	1924.44	2546.59	2268.81	940.023
ncRNA gene	PF3D7_1240500	Plasmodium RNA of unknown function RUF6	1 (direct)	1 (direct)	X		-2.24497	12916.3	4913.02	1482.03	1705.76	1750.16	622.646
ncRNA gene	PF3D7_0412500	Plasmodium RNA of unknown function RUF6	1 (direct)	1 (direct)	X		-2.23063	16008.5	6071.92	1563.06	2251.05	1914.17	879.157
ncRNA gene	PF3D7_0412800	Plasmodium RNA of unknown function RUF6	1 (direct)	1 (direct)	X		-2.22977	46007.9	18790.2	5571.02	6405.8	5928.43	2688.1
ncRNA gene	PF3D7_0531500	unspecified product	0	0			-2.21903	544.446	345.933	100.888	77.8181	98.0883	36.7002
ncRNA gene	PF3D7_0413000	Plasmodium RNA of unknown function RUF6	1 (direct)	1 (direct)	X		-2.19444	45761.4	18047.9	5476.93	6460.56	5861.44	2836.01
ncRNA gene	PF3D7_0421000	Plasmodium RNA of unknown function RUF6	1 (direct)	1 (direct)	X		-2.19273	4825.44	1867.96	452.384	590.054	656.834	315.709
ncRNA gene	PF3D7_1425000	Plasmodium RNA of unknown function RUF4	0	0			-2.19209	392.953	99.8406	19.1065	42.0806	65.4416	3.18319
ncRNA gene	PF3D7_1137000	U2 spliceosomal RNA	3 (1 direct 2 reverse)	0	X		-2.12581	5.09914e+06	2.41482e+06	757134	747714	871609	278300
ncRNA gene	PF3D7_0420800	Plasmodium RNA of unknown function RUF6	1 (direct)	1 (direct)	X		-2.12478	5035.43	1767.53	419.712	748.361	593.584	315.709
ncRNA gene	PF3D7_1341100	U6 spliceosomal RNA	0	0			-2.12205	201377	70975.3	16033.1	21328.4	29952	15042.7
ncRNA gene	PF3D7_0711600	Plasmodium RNA of unknown function RUF6	1 (direct)	1 (direct)	X		-2.11327	17875.1	6814.22	1806.43	2798.36	2348.03	985.834
ncRNA gene	PF3D7_0809000	Plasmodium RNA of unknown function RUF6	1 (direct)	1 (direct)	X		-2.08045	11355.2	5078.78	1481.62	1788.66	1621.81	829.448
protein coding gene	PF3D7_0610400	histone H3	3 (reverse)	0	X	X	-2.04378	23085	72597.1	21217.7	9471.22	10766.3	8136.34
ncRNA gene	PF3D7_0411600	tRNA Glutamic acid	1 (direct)	1 (direct)	X		-1.98263	910.918	452.633	81.4149	162.158	164.466	34.4995
protein coding gene	PF3D7_0932200	profilin	0	0		X	-1.95591	149.637	382.863	138.929	51.4361	60.818	60.2589
			39 down-regulated, 11 have no B and/or A box 28/39 have B and/or A box
			72% have B and/or A box

## Sheet: 12hpi_all
12hpi all genes down- and up-regulated
genes	logFC	logCPM	LR	PValue	FDR
PF3D7_1425000	-3.62143824815738	3.29502726279642	36.3110727164727	1.68205498268409e-09	9.51033887209584e-06
PF3D7_1322900	-3.34840566025215	4.61672058741998	34.8625766638185	3.53816642072937e-09	1.00023964714019e-05
PF3D7_1244300	-2.85452243856799	8.3332040651859	29.1563450448505	6.67667301930272e-08	0.000125833030837125
PF3D7_1241000	-2.70941638132375	10.6517072405594	26.4915120014703	2.64698617768269e-07	0.000374151496215448
PF3D7_1206800	-4.39702415216861	1.91127927035444	23.0349779844044	1.59080626006523e-06	0.00143162195226673
PF3D7_1469500	-6.83314845259476	0.17380612117075	22.9034473195445	1.70346072110595e-06	0.00143162195226673
PF3D7_0527700	-3.5219745493031	0.766295961674094	22.8271550173327	1.77243609230051e-06	0.00143162195226673
PF3D7_0714700	-3.14726192667902	1.47018185010008	22.292452943754	2.34124957894882e-06	0.00158216872833344
PF3D7_0625800	-6.74358242903114	1.08678467302708	22.1523417804508	2.51848577201998e-06	0.00158216872833344
PF3D7_1424300	-2.68062484670082	4.30714599101786	20.5514297197912	5.80504185518861e-06	0.00328217066492364
PF3D7_1103200	-6.44441572311515	0.897842386026796	18.875974583411	1.39498558004485e-05	0.00717022588143053
PF3D7_0712100	-2.21596305443979	7.05653248933231	18.2547472414114	1.93243735847329e-05	0.00858305503318724
PF3D7_1147400	4.4634427423887	5.34786947067027	18.1259714696505	2.06762008077731e-05	0.00858305503318724
PF3D7_1105200	-6.39253141108921	1.46608185870754	17.8040480873971	2.44861730774496e-05	0.00858305503318724
PF3D7_0420800	-2.2135572682073	6.18361280665734	17.8006773034997	2.45295909230491e-05	0.00858305503318724
PF3D7_1372600	-2.31657926240464	5.12612505474808	17.7266834305374	2.55024119794334e-05	0.00858305503318724
PF3D7_1240500	-2.16353166556363	8.23825075179755	17.7041092218206	2.5806851001801e-05	0.00858305503318724
PF3D7_0809000	-2.18443645588409	7.45521992741771	17.4800154287627	2.90343707032566e-05	0.0087089854064012
PF3D7_0808500	-2.16699113505756	8.10454312267303	17.4649004747297	2.92661341920097e-05	0.0087089854064012
PF3D7_1130300	-2.50176412536109	3.95222919920416	16.9395975205328	3.85881889402386e-05	0.0109088810134054
PF3D7_0421000	-2.15386033918547	6.1328558504611	16.7348335447812	4.29844936178092e-05	0.011573063186433
PF3D7_0209000	-6.27423482795403	0.305028458647062	16.6089992925735	4.59325549918922e-05	0.0118046666329163
PF3D7_0421400	-2.09030980100035	7.22524672152734	16.3588269706682	5.2411487821575e-05	0.0125021905084289
PF3D7_0904500	-6.17812433415041	1.69597391905704	16.3351965915769	5.30690789179863e-05	0.0125021905084289
PF3D7_1369900	-6.15511163796929	0.433310559869261	15.8269964844436	6.94051537969771e-05	0.0156966695827243
PF3D7_1341100	-2.00244197325592	12.3821916484607	15.5510016622884	8.03090869635225e-05	0.0165481620929286
PF3D7_1222000	-6.10349982512013	1.13338963651973	15.5007718076986	8.24715731322837e-05	0.0165481620929286
PF3D7_0412800	-1.99947124953295	10.1828823841098	15.4700414298024	8.38233599748535e-05	0.0165481620929286
PF3D7_1116100	-6.09231355036959	1.85993630053224	15.4464242506617	8.48773789697433e-05	0.0165481620929286
PF3D7_0412500	-2.00576229305227	8.33823323896915	15.3332040543632	9.01185443013742e-05	0.0169843416493323
PF3D7_1424900	-2.91315890835163	1.26529439761687	15.1479661352269	9.94053364667269e-05	0.0179255369623198
PF3D7_0413000	-1.97434750848835	10.1711635738909	15.1094650671145	0.000101453339723069	0.0179255369623198
PF3D7_1143200	-6.07620297773644	0.681938694690275	14.9638806908133	0.000109588888155291	0.0187762295039398
PF3D7_0423800	6.47880648967409	1.2072371956249	14.9013941930465	0.000113279235423951	0.0188376705025593
PF3D7_0712700	-1.95958974850635	7.90860378911486	14.7871449586958	0.000120353146128046	0.0194421910916563
PF3D7_1208000	-6.03374025663536	0.993827124272459	14.6919681082774	0.000126584641231357	0.0198808211533915
PF3D7_1405000	-3.37131338002048	1.57429799434258	14.3958600882324	0.000148127607610374	0.02169719645329
PF3D7_0103800	6.42067268919606	1.17095002717654	14.3455587230368	0.000152138158597242	0.02169719645329
PF3D7_1014500	-3.35812892602905	0.554314490980521	14.3059306145654	0.000155374594991482	0.02169719645329
PF3D7_0620800	-2.68036530753138	2.98643377798231	14.2797673322945	0.000157549266906507	0.02169719645329
PF3D7_0112200	-5.95536669428508	3.20042815431448	14.240501053133	0.000160870713473393	0.02169719645329
PF3D7_1363400	-2.67123494998718	2.17463138242874	14.2369471546379	0.000161174787944496	0.02169719645329
PF3D7_0711800	-1.91571277275568	8.46111313775293	14.0876313545869	0.000174487412121883	0.0229430657706308
PF3D7_0513100	2.8237969427393	3.34243526110366	13.6738341777448	0.000217463463981533	0.027944055121627
PF3D7_0918100	2.08530065780754	4.41855785376905	13.6092615126506	0.000225072408324099	0.0282790977036545
PF3D7_1433600	6.34102711870911	3.73318251903464	13.560610395805	0.00023098196877921	0.0283906967712533
PF3D7_1360300	-5.88277634727421	1.28286687111237	13.4077544976028	0.000250586210928662	0.0300041768160122
PF3D7_0522500	6.32912428173842	4.45690478761021	13.3770474414862	0.000254722406644603	0.0300041768160122
PF3D7_0711600	-1.86003752457614	8.38186885644312	13.3185755037436	0.000262789742380145	0.0303227184370886
PF3D7_1240800	-1.84433140552928	8.59267077054064	13.2533057300618	0.000272099602841668	0.0304453093696143
PF3D7_0928700	-5.85303380225521	1.61321994196283	13.2360114669903	0.000274621644472998	0.0304453093696143
PF3D7_0719100	6.29407685305828	2.76734370604285	13.1619598335249	0.000285689923685533	0.030834129321768
PF3D7_0805200	3.42287051731301	1.82316573594945	13.1401424770968	0.000289035877972003	0.030834129321768
PF3D7_0618600	-5.90337250795598	4.17576654250553	13.0299624088819	0.000306546702916116	0.0320965751534763
PF3D7_1140400	6.21932607013835	0.608845052224216	12.711264453325	0.0003634595888739	0.0373636457362369
PF3D7_0521400	-5.74404682721667	1.06301030056098	12.6563771981701	0.000374286781518918	0.0377895975483564
PF3D7_0934300	-5.81371572235457	1.78772122779407	12.5727840094848	0.000391405072143913	0.0388246364544155
PF3D7_1035700	6.15597460848341	0.114447872100768	12.4392251993817	0.000420410152053313	0.0409827413743006
PF3D7_1252000	-5.78144135943249	1.1067543997834	12.3980216123926	0.000429788959511502	0.0411868945267463
PF3D7_0723000	-3.414343453389	0.847106795378678	12.1657388471605	0.000486753798516948	0.0458684329469138
PF3D7_1021600	3.26237963579105	2.8403263623282	12.0594366610773	0.000515308615913927	0.0477631953176613
PF3D7_0207800	-3.4172689331114	0.387361133060616	11.9690723222961	0.000540908639753928	0.0493273782123985
PF3D7_1405600	-1.78315917752548	7.6385726754116	11.9191701586874	0.000555592246871714	0.0498621994255979
PF3D7_1476300	-5.64856125283752	-0.285139752396412	11.7350869885677	0.000613327177777322	0.0541836228617653
PF3D7_1446100	-3.33660210435078	0.439264374553292	11.4044129471096	0.000732698503693485	0.063733497536661
PF3D7_1003900	-5.56694620804294	-0.31529670896797	11.3524112924512	0.000753500751599623	0.0645498977203677
PF3D7_0721200	-5.5366649219899	0.940891551582441	11.2029554135234	0.000816671590540798	0.0689173309390698
PF3D7_1443100	3.17124526385227	2.70946817428507	11.1712963352797	0.00083072562472251	0.0690723923850158
PF3D7_0108700	2.29980290255468	3.53791007463295	11.0137954336622	0.000904362770051363	0.0741053203169624
PF3D7_1369700	-1.9537585522509	3.02830865828311	10.9592144846991	0.000931392916312294	0.075229936411853
PF3D7_0102500	2.70315287379395	1.79458935713704	10.9160219291561	0.000953361100684957	0.07591976990525
PF3D7_1438300	-5.56805245776292	0.334186679370928	10.870213845166	0.00097723245572523	0.0767398931204229
PF3D7_1217900	-2.40434384778567	1.93967111443245	10.7963312056766	0.00101701451671014	0.0787698640750566
PF3D7_1338700	-5.47951549802596	2.69045353908664	10.487118504361	0.00120209702057041	0.0918467101933123
PF3D7_1358700	-1.94942904747066	2.73293984563124	10.3602248831292	0.00128759518178499	0.0970413990732424
PF3D7_0619600	-5.44634256985869	0.0165985410935756	10.3362717892577	0.00130441215591907	0.0970413990732424
PF3D7_0903600.1	-5.42689940406608	0.882052550416117	10.2736904222546	0.00134940619204801	0.0978146488440954
PF3D7_0903600.2	-5.42689940406608	0.882052550416117	10.2736904222546	0.00134940619204801	0.0978146488440954
PF3D7_0519500	-2.20492333213012	3.40571309709448	10.238899193554	0.00137509625476873	0.0984151167653465
PF3D7_0218800	-1.60640949841323	9.42820613349002	10.2022694519418	0.00140267927408221	0.0991343576957602
PF3D7_1014300	-5.3944594351523	1.56826493958997	10.1283043607987	0.00146009665443714	0.101918351656637
PF3D7_1003600	5.79596245905507	1.55352694797255	10.0023735426391	0.00156338597609757	0.107449208222829
PF3D7_1208700	-5.36226900004286	0.927636841509359	9.98600935582024	0.00157734069375572	0.107449208222829
PF3D7_1370200	-5.33033842674649	0.12337638844107	9.84675111959076	0.00170131961671497	0.11185187340589
PF3D7_0215000	-5.33033842674649	0.722374758061975	9.84675111959075	0.00170131961671498	0.11185187340589
PF3D7_0802800	-5.33033842674649	-0.306081634272832	9.84675111959075	0.00170131961671498	0.11185187340589
PF3D7_1467800	3.02017768150695	3.28363884867146	9.81512777333791	0.00173082250852408	0.112483568542473
PF3D7_0919000	1.61204063785203	6.74280233865491	9.78738885111274	0.00175712802485548	0.112895475596964
PF3D7_1331600	5.73775451491847	1.61620423047875	9.72024307148228	0.00182249411443826	0.115779569921729
PF3D7_1438600	-2.30480407888361	1.64764536751437	9.58183512715359	0.00196511887995016	0.121565239728993
PF3D7_0708400	-1.54980285613586	10.6566970839171	9.56752544724513	0.00198049559573735	0.121565239728993
PF3D7_0806900	5.70105966128567	1.10984208118335	9.54971541292968	0.00199980420271064	0.121565239728993
PF3D7_1337800	5.74959293788108	0.20653558184185	9.52783008760684	0.00202379260531625	0.121565239728993
PF3D7_1011100	-2.56231528588936	0.933623610466013	9.51550003457442	0.00203743580130147	0.121565239728993
PF3D7_0914900	-2.35055155075502	1.97734681636675	9.49753297358417	0.00205748349373139	0.121565239728993
PF3D7_0502200	-2.29974363081456	1.52608465307746	9.49166699642057	0.00206407198690898	0.121565239728993
PF3D7_1214100	-3.100591951971	1.4803368458211	9.39985276361081	0.00217002868601041	0.126488063821679
PF3D7_0620900	-1.83388889480851	4.79290382010778	9.30592854350176	0.00228413512313027	0.131780612103862
PF3D7_1149900	-5.26953363685665	0.723977315466294	9.09893568346191	0.00255758276191634	0.145585906761631
PF3D7_1211500	-5.25987996324353	0.777616225520274	9.07195310523897	0.00259559692018946	0.145585906761631
PF3D7_1329700	5.64799710942764	-0.123574107424217	9.06589293951877	0.00260421330932843	0.145585906761631
PF3D7_1213100	-1.50396693571255	15.830479766805	9.05036964400182	0.00262641713648503	0.145585906761631
PF3D7_0911700	5.60652576330413	1.7838234286131	9.01117658577934	0.00268333623734041	0.145647407008181
PF3D7_1300200	5.60652576330413	0.483964519980865	9.01117658577934	0.00268333623734041	0.145647407008181
PF3D7_1428000	-2.8034069092493	0.817486726573825	8.98050912771524	0.00272874606123623	0.145647407008181
PF3D7_1311000	2.6276758152576	2.43607858278957	8.97929027010395	0.002730566880592	0.145647407008181
PF3D7_1320900	1.63410234508215	4.74230047967087	8.9463809869733	0.00278019832560902	0.145745131852341
PF3D7_0802500	-2.13908352579697	2.37742424810169	8.943915222717	0.00278395370358203	0.145745131852341
PF3D7_0624500	5.58789526396271	1.32815851120145	8.92507986606329	0.00281281058405114	0.14590487194702
PF3D7_0608300	-5.21511661151888	0.790871540983047	8.9063626703151	0.00284178737799628	0.146067871229009
PF3D7_1365200	-1.77574515441778	2.94469392270287	8.88060778434922	0.00288215579439878	0.146808187941718
PF3D7_0618400	-5.20674790829456	-0.464863954153858	8.86326805176008	0.00290966183578874	0.146885964460264
PF3D7_1108800	-2.3757091619173	0.223653273852889	8.78902652978323	0.00303047920075223	0.151631233637638
PF3D7_1014100	-5.17132507224167	-0.535771322565244	8.74642159894714	0.0031021017556625	0.15192681655661
PF3D7_1348100	-5.17132507224167	0.175519454282897	8.74642159894714	0.0031021017556625	0.15192681655661
PF3D7_0916500	5.57168396969883	3.58418383115062	8.73684809639379	0.00311843089255133	0.15192681655661
PF3D7_1404400	5.56839982220679	1.2566035366904	8.7220349430037	0.00314386939107241	0.15192681655661
PF3D7_0500900	5.55526428676367	0.289928364085982	8.66303645852384	0.00324729724916994	0.15553612042484
PF3D7_0937600	5.55198075611248	0.885876635287093	8.64835046922204	0.00327357593395047	0.15553612042484
PF3D7_0304300	-2.11303527679358	1.59241197405441	8.61583724066897	0.00333252579754155	0.155789077549111
PF3D7_1252900	-5.1370098417682	0.220080232123671	8.61502757498859	0.00333400749618721	0.155789077549111
PF3D7_1135900	1.66184013082691	4.09277922566106	8.42779167799477	0.00369528858265997	0.167513501236
PF3D7_0314000	-5.08618245930303	1.4275999271661	8.42379057263748	0.00370342901565263	0.167513501236
PF3D7_0316400	-5.08618245930303	2.50916415807882	8.42379057263748	0.00370342901565263	0.167513501236
PF3D7_1406900	-5.08618245930303	1.24195678440458	8.42379057263748	0.00370342901565263	0.167513501236
PF3D7_0600400	2.83998203055892	0.814081609282207	8.39324359808549	0.00376618247653589	0.168999966050269
PF3D7_0515400	5.47784796382847	-0.112467897222406	8.3411384477753	0.00387573040660009	0.172238914017443
PF3D7_1451100	1.45667050886554	8.42751485998136	8.33012886226632	0.00389928917478471	0.172238914017443
PF3D7_0309800	1.67337202186892	4.10044452961144	8.2165252879736	0.00415106085135894	0.181294127881276
PF3D7_1442500	-2.67829115971877	2.11968160214067	8.2089536252173	0.00416841822153625	0.181294127881276
PF3D7_0612500	-2.93791765148372	0.740305752650472	8.15125914131125	0.00430312726929142	0.185724286874608
PF3D7_0519300	5.44711622083243	1.21541391502526	8.09081167031337	0.00444902328097301	0.190566497201677
PF3D7_1336200	-3.42561529198428	2.9134894853046	8.07661292001858	0.00448401780744711	0.190621328445909
PF3D7_0618500	5.43679728693467	0.9734381934166	8.04751316911421	0.00455661610787349	0.192261996074005
PF3D7_1007000	-1.73078418107744	3.1903676890876	8.01464108534167	0.00464006690618124	0.194332876204065
PF3D7_0717600	-3.4053959425247	1.57818935772461	7.97538180277558	0.00474177540575515	0.196716053184507
PF3D7_0800800	-1.83060608867864	0.683328914929154	7.96594705412024	0.0047665545253409	0.196716053184507
PF3D7_1351700	-2.92701865004835	0.840103596362291	7.90954872006953	0.00491745351705437	0.19927774602983
PF3D7_0917800	-1.68180049956511	2.26289872045016	7.9001146882501	0.00494316630792273	0.19927774602983
PF3D7_0830800	-1.78140207046138	1.52075618472402	7.89222313233761	0.00496478022905519	0.19927774602983
PF3D7_1249000	5.39675458022407	0.741126305708392	7.89046531901177	0.00496960774499577	0.19927774602983
PF3D7_1226500	-2.91471947972994	1.36695784600662	7.86756714241496	0.00503293219427765	0.199487366795875
PF3D7_1438400	-1.70683537587404	2.50356261201865	7.8630932608457	0.00504540032752212	0.199487366795875
PF3D7_0932400	-2.9094436945455	0.914121294409018	7.83877025474481	0.00511373829089706	0.200785252060639
PF3D7_1105100	1.40407534492561	10.7222434496499	7.82210988584585	0.00516109099398695	0.201246955034498
PF3D7_1241600	5.35728521342024	1.94200261604868	7.73814125497518	0.00540664256060609	0.202532801573804
PF3D7_1327300	5.35728521342024	1.02577422129612	7.73814125497518	0.00540664256060609	0.202532801573804
PF3D7_0911600	-5.04678914068544	0.710413953266366	7.7285980732503	0.00543529354366717	0.202532801573804
PF3D7_0715400	5.35390386607162	0.403208782171152	7.7244924724373	0.00544766714790983	0.202532801573804
PF3D7_1111800	5.35390386607162	0.880669084851578	7.7244924724373	0.00544766714790983	0.202532801573804
PF3D7_0918700	2.29849389876086	2.34376702505556	7.72147230571779	0.00545678776446018	0.202532801573804
PF3D7_1462900	-2.88822547498685	0.647492016469787	7.71769578717246	0.00546821440183129	0.202532801573804
PF3D7_0721700	5.35052340508706	0.297754234450472	7.71087075004921	0.00548892688845768	0.202532801573804
PF3D7_1204900	5.38274941540748	0.163719675721489	7.69495702520911	0.00553753283355414	0.202532801573804
PF3D7_0831500	-1.57427782598867	3.18077915847216	7.69015730972119	0.00555227878385914	0.202532801573804
PF3D7_1446400	5.33701079415636	0.371609524532906	7.65665445179158	0.00565632962144004	0.204526969568417
PF3D7_1021700	-1.55497448130933	3.81309006001845	7.64934461332568	0.00567929505168756	0.204526969568417
PF3D7_1149600	1.82961257055317	2.64047147396715	7.60339244840081	0.00582585820974231	0.208474185766175
PF3D7_1472300	-1.68347159373285	2.55977369813743	7.59204370842668	0.00586264512501269	0.208474185766175
PF3D7_1016900	3.19918387467552	1.99739019750192	7.53453647163457	0.00605273076667008	0.213888373467204
PF3D7_1138500	1.48456548235062	4.96833575258482	7.46147801438099	0.00630332318375446	0.220196790766918
PF3D7_0414300	-1.522772199443	3.60309257682073	7.45981744817349	0.00630914044998953	0.220196790766918
PF3D7_1117100	-4.9510275488451	1.5925733734249	7.42966544926977	0.00641572683671455	0.221001887124369
PF3D7_1346600	-4.9510275488451	-0.218965177926942	7.42966544926978	0.00641572683671455	0.221001887124369
PF3D7_1400200	-1.77563309235654	2.23030910435094	7.42022600308511	0.00644947141413528	0.221001887124369
PF3D7_0934800	3.1605801014736	0.763153425995052	7.40856776413143	0.00649139805721302	0.221098582020978
PF3D7_1036500	5.3442205737774	0.606821589267372	7.39688671913753	0.00653368583955894	0.221192905131669
PF3D7_0824400	-1.7583060724233	4.24726166897499	7.38625746051185	0.00657241033995762	0.221192905131669
PF3D7_1313200	-2.4225094346565	0.320092217900648	7.37222603972306	0.0066238887399755	0.221606313229713
PF3D7_1420000	1.65985255830841	4.26038374642521	7.31665104581892	0.00683186040913321	0.223178279251307
PF3D7_1031700	1.51364973078479	4.98766381552764	7.31614179643378	0.00683379663790719	0.223178279251307
PF3D7_1244500	-4.91316549572505	-0.272432376397823	7.30722348701559	0.00686779615130365	0.223178279251307
PF3D7_1363800	-4.91316549572505	0.524779150101663	7.30722348701559	0.00686779615130366	0.223178279251307
PF3D7_1245700	-2.1233413825004	0.467834440438546	7.30645267844039	0.00687074282560378	0.223178279251307
PF3D7_1116000	3.17226244768392	0.715456065434624	7.29413833347301	0.0069179940478204	0.223178279251307
PF3D7_0935900	1.34956771630509	8.08335785168625	7.24837218985609	0.00709653148255443	0.223178279251307
PF3D7_0814100	-2.29023083814831	0.875489028086792	7.20505076549811	0.00726986929208008	0.223178279251307
PF3D7_0512700	-1.64147705116095	3.24868235799263	7.19953596324575	0.00729224344786929	0.223178279251307
PF3D7_1142500	1.35590300655801	7.5663269204625	7.18752074731261	0.00734123449290701	0.223178279251307
PF3D7_0724800	5.23952973960946	1.64942350036565	7.16486857760622	0.00743451373290709	0.223178279251307
PF3D7_1407000	-4.85981773210582	0.887967980247767	7.15241076896889	0.00748632909711299	0.223178279251307
PF3D7_1102500	-4.85981773210582	0.400494794510156	7.15241076896888	0.00748632909711301	0.223178279251307
PF3D7_1334600	-4.85981773210582	0.336890872800276	7.15241076896888	0.00748632909711301	0.223178279251307
PF3D7_1439600	-4.85981773210582	1.42085015367336	7.15241076896888	0.00748632909711302	0.223178279251307
PF3D7_1456100	-4.85981773210582	-0.441045577817514	7.15241076896888	0.00748632909711302	0.223178279251307
PF3D7_0414100	-2.82437639606818	1.18164607784117	7.12255483144681	0.00761201568730386	0.223178279251307
PF3D7_1024100	-4.84936070977587	0.258404667940037	7.11223706555878	0.00765595091933398	0.223178279251307
PF3D7_0931900	-4.8415612829956	-0.135304393780672	7.09485676932802	0.0077305469694375	0.223178279251307
PF3D7_1109300	-3.28664679689331	0.190226410216424	7.08255396703343	0.00778379931653016	0.223178279251307
PF3D7_0828900	5.20981356912883	0.0397936958771456	7.06152476454328	0.00787569378796945	0.223178279251307
PF3D7_1434200	1.38672383706399	6.28061102198443	7.05829900566131	0.00788988769653582	0.223178279251307
PF3D7_1426600	-3.28095542322021	0.226254861876434	7.05739813976524	0.00789385633652562	0.223178279251307
PF3D7_0510100	-4.82342031863128	2.87227761788484	7.03808113706873	0.00797944769749037	0.223178279251307
PF3D7_1400400	-4.82342031863128	-0.328759468538699	7.03808113706873	0.00797944769749037	0.223178279251307
PF3D7_0804400	-4.82342031863128	0.607113638636037	7.03808113706874	0.00797944769749037	0.223178279251307
PF3D7_0221800	-4.82342031863128	-0.339930497402019	7.03808113706874	0.00797944769749038	0.223178279251307
PF3D7_0631200	-4.82342031863128	-0.613608117460943	7.03808113706874	0.00797944769749038	0.223178279251307
PF3D7_1002300	-4.82342031863128	-0.290142847410418	7.03808113706874	0.00797944769749038	0.223178279251307
PF3D7_1315100	-4.82342031863128	-0.374244596541641	7.03808113706874	0.00797944769749038	0.223178279251307
PF3D7_1018400	5.20273996864256	0.0703830929688768	7.03531403680267	0.00799178587739993	0.223178279251307
PF3D7_1250100	5.24245938433627	0.0195814206103757	7.03148268760528	0.00800890163923266	0.223178279251307
PF3D7_0815700	-2.36609392570585	0.371249533260572	7.02388623587493	0.00804294816343886	0.223178279251307
PF3D7_0503000	5.19920533039808	3.10976584032362	7.02225213184057	0.00805029137794317	0.223178279251307
PF3D7_1031900	5.23857514151418	1.21698662876092	7.01716336867303	0.00807320283856039	0.223178279251307
PF3D7_0405200	-3.26616509335029	1.17281891289241	7.01302372474874	0.00809189020985461	0.223178279251307
PF3D7_1116900	5.18861030470274	0.277396065130764	6.98324007645306	0.00822765191074323	0.22330038070045
PF3D7_1448700	-2.14902495724803	0.743909457164135	6.98158140582313	0.00823528071221754	0.22330038070045
PF3D7_1022700	3.08175888061376	0.829504885476906	6.97890535029057	0.00824760407851728	0.22330038070045
PF3D7_1112500	-1.70847265038441	1.69848213813519	6.97635529426996	0.00825936476507925	0.22330038070045
PF3D7_0802900	-4.7874875082206	-0.00663937035988414	6.92681871994395	0.00849125961276913	0.22330038070045
PF3D7_0825600	-4.7874875082206	-0.139153285724081	6.92681871994394	0.00849125961276914	0.22330038070045
PF3D7_1014900	-4.7874875082206	0.0259101353273335	6.92681871994394	0.00849125961276914	0.22330038070045
PF3D7_1209800	-4.7874875082206	0.00465169436957256	6.92681871994394	0.00849125961276914	0.22330038070045
PF3D7_1222100	-4.7874875082206	0.797136387604996	6.92681871994394	0.00849125961276914	0.22330038070045
PF3D7_1306200	-4.7874875082206	2.24900388092179	6.92681871994394	0.00849125961276914	0.22330038070045
PF3D7_0710100	-1.84518364308097	2.11129692455938	6.88781430529505	0.00867853199576851	0.226678839157092
PF3D7_1306500	-2.36956447424112	0.388030367421069	6.8720741986444	0.00875529746030908	0.226678839157092
PF3D7_1313900	-1.73893363674135	1.62288039435019	6.86811737170517	0.00877470424004395	0.226678839157092
PF3D7_0714900	-1.47546166961464	4.4300795569226	6.86701953403232	0.0087800965290773	0.226678839157092
PF3D7_1353800	1.36719400241235	6.52643906390392	6.85350508281607	0.00884675451806123	0.227361591114174
PF3D7_0425900	-1.47876946162284	3.59280540115078	6.84400959040962	0.00889389928148952	0.227538943608786
PF3D7_0414600	5.17934947437226	1.40454606076289	6.8105982305825	0.00906184009279708	0.229878493399772
PF3D7_0601900	1.3605603200782	4.62276204832049	6.80931876010908	0.00906833547054491	0.229878493399772
PF3D7_0607800	-2.49924184300743	1.02786190848471	6.7984500186595	0.00912370449400559	0.229878493399772
PF3D7_0531500	-1.35231311652666	5.78484373786235	6.7937067220267	0.00914797683320635	0.229878493399772
PF3D7_0307100	1.30579407911838	8.64702344988694	6.77580191030296	0.00924019660717927	0.231168458482264
PF3D7_0524800	-1.35222699729556	5.15361410190664	6.75579720581378	0.00934435886853868	0.232744515606686
PF3D7_1016300	1.31553247710674	7.47908402623525	6.70908960309042	0.00959226840428183	0.235268500497927
PF3D7_0921100	-2.79947435329906	0.358076816198954	6.70792689327665	0.00959852494645366	0.235268500497927
PF3D7_1473600	5.14397405802456	3.05551944871425	6.69281924724543	0.00968020034429885	0.235268500497927
PF3D7_1252200	5.14397405802456	-0.160301158172454	6.69281924724542	0.00968020034429887	0.235268500497927
PF3D7_1332200	5.14397405802456	0.136748929167898	6.69281924724542	0.00968020034429887	0.235268500497927
PF3D7_0404700	-2.47509568708817	-0.0368958059425568	6.67705136637341	0.00976620482354237	0.235268500497927
PF3D7_1335600	-2.47509568708817	0.778332966141806	6.67705136637341	0.0097662048235424	0.235268500497927
PF3D7_1131100	-1.40534970783847	3.30819464944501	6.67479404064293	0.00977858111372708	0.235268500497927
PF3D7_1356800	5.13257450377378	-0.0141338087004206	6.65274165973617	0.00990033696112917	0.236948986160525
PF3D7_0915500	-3.18417489248373	0.0754266940203723	6.64700855112041	0.00993224437920842	0.236948986160525
PF3D7_0703400	-2.47052426247661	0.998871828202022	6.61436296189771	0.010115951859797	0.240317612669296
PF3D7_1019400	1.29770352382289	7.47003454330405	6.58189577494045	0.010302111387928	0.243716057687635
PF3D7_1432700	-2.08484454455022	3.51408326277063	6.45751831852725	0.0110483843158157	0.259246023779762
PF3D7_0301500	-1.71326139366317	1.83722222163144	6.45721322601837	0.0110502815229789	0.259246023779762
PF3D7_0304600	5.05259493140028	2.96040988872645	6.39155886420747	0.0114664288587697	0.265622674964974
PF3D7_0523300	5.05259493140028	2.47379174079901	6.39155886420747	0.0114664288587697	0.265622674964974
PF3D7_0504300	5.05259493140028	-0.477576023940811	6.39155886420747	0.0114664288587698	0.265622674964974
PF3D7_1129300	-2.73170375543964	-0.0910614327195797	6.38482626033082	0.011510002717796	0.265622674964974
PF3D7_0101600	5.04517262739164	0.094692805019741	6.3664945559376	0.0116295102739116	0.26620749428622
PF3D7_0704100	5.04517262739164	0.49750437455309	6.36649455593761	0.0116295102739116	0.26620749428622
PF3D7_1459200	-1.61607463489277	2.00741374547795	6.35689064231313	0.0116926275946132	0.266573050080416
PF3D7_1468400	5.03775871305579	0.269597919193312	6.34155359740808	0.011794153508542	0.267807806977094
PF3D7_1106300	5.03035336097412	2.48720782229618	6.3167357367515	0.0119603605694774	0.268802304374207
PF3D7_0709600	1.76017849250289	2.63400050323276	6.31627745105057	0.0119634522593108	0.268802304374207
PF3D7_1204200	-2.08568878203113	1.53594444930886	6.31374126955529	0.0119805767071631	0.268802304374207
PF3D7_1136900	2.9970612120032	1.25228982536607	6.29442468842755	0.0121118322018304	0.270673119640905
PF3D7_1323900	-1.55838501376859	2.18341231289923	6.27823404980182	0.0122229843996107	0.272081707855901
PF3D7_0704400	-2.12340061344014	1.61353068332669	6.22369400433992	0.0126051849123243	0.278973078291788
PF3D7_0802100	-2.1490485195986	1.08936740638482	6.22003611385948	0.0126312536333035	0.278973078291788
PF3D7_1006200	1.24014585787609	9.71856373709006	6.20624984363732	0.0127300032745677	0.28006007204049
PF3D7_1344800	1.5627369044615	3.6856686377245	6.1898637323913	0.0128484079795391	0.280844223913781
PF3D7_1419300	-1.59463598305224	3.3726373190733	6.18470094593046	0.012885947882117	0.280844223913781
PF3D7_1201200	-1.62165607145025	2.42171583893287	6.18076239302387	0.0129146618708141	0.280844223913781
PF3D7_1035800	1.29486675648647	4.35751572434295	6.16099301952048	0.0130597870987387	0.282912016307543
PF3D7_1358200	-1.5304140594729	2.87204369487618	6.13400533115587	0.0132606125060964	0.285027873002704
PF3D7_1146900	-1.57249866848653	2.20821744441312	6.1308442568775	0.013284342060907	0.285027873002704
PF3D7_0825200	5.01726876924782	3.32397799026262	6.12760624266908	0.0133086944592702	0.285027873002704
PF3D7_1142600	1.24117027121413	7.88826399791955	6.11173488039438	0.0134287251414046	0.286513252639629
PF3D7_1242300	2.93102903563966	3.41623764731111	6.07573625388279	0.0137051165819489	0.291311011858417
PF3D7_0704300	-2.39262123290045	1.17147036037311	6.06012614582665	0.0138267807493383	0.292796323433553
PF3D7_0206100	1.50346757778453	3.85469295848393	6.00375522515636	0.0142754617836342	0.301169630315923
PF3D7_1146100	4.97278025550989	0.797809967951895	5.99188503169965	0.014371836242974	0.301535225033255
PF3D7_0520200	-2.2059038732958	2.29787693313248	5.98382710857233	0.01443764012286	0.301535225033255
PF3D7_0609700	1.37933710339268	4.44256594192134	5.97870498620724	0.0144796303480526	0.301535225033255
PF3D7_1452700	-1.57704540939284	4.39049272078932	5.9754819972238	0.0145061162378927	0.301535225033255
PF3D7_1102400	-1.48507499022454	2.90692243120584	5.96413221777845	0.014599784189584	0.302370622006988
PF3D7_1227500	2.93806958220317	1.34290983939401	5.93675226227437	0.0148283182235389	0.305737604725922
PF3D7_1229200	-1.51610658408143	0.980051596498002	5.92996384431465	0.0148855472458754	0.305737604725922
PF3D7_1004200	-1.96115433723489	2.66133933218851	5.92534916192036	0.0149245806339502	0.305737604725922
PF3D7_1314900	1.31925286371732	4.72279743324183	5.91820686973658	0.0149852017863082	0.30587123068515
PF3D7_0409600	-3.08442811391447	2.33517962690944	5.90036226383857	0.0151377709574133	0.3067383844334
PF3D7_1021100	-1.68252299790104	1.65308395678575	5.89683037668868	0.0151681573196438	0.3067383844334
PF3D7_1456400	2.90884423568962	0.658750631612979	5.89424503249793	0.0151904399790152	0.3067383844334
PF3D7_1114900	-3.07873674024138	0.102017062955362	5.87837149587468	0.0153279924162732	0.307783651640632
PF3D7_1459500	-2.40228973417212	0.492807747718087	5.87572191408156	0.0153510770715702	0.307783651640632
PF3D7_1209300	-2.18162187121485	2.22708478274939	5.8501179218931	0.0155760074546352	0.309025095747011
PF3D7_0201900	1.20507110378077	8.07721838383871	5.84955536512704	0.0155809874468504	0.309025095747011
PF3D7_1130700	-3.06498494812186	1.94155348947196	5.8428987487677	0.0156400393591046	0.309025095747011
PF3D7_0711200	-2.08196604696386	0.726841661735732	5.84066835535539	0.0156598770747298	0.309025095747011
PF3D7_0400200	-1.73353824721227	3.80116248071452	5.8377048230431	0.0156862756419158	0.309025095747011
PF3D7_1369300	-4.60417387747689	-0.665186895706721	5.82604217913591	0.0157906103184966	0.309263993068767
PF3D7_1003400	4.91721628202932	0.105624901819525	5.82412846130584	0.0158077987260123	0.309263993068767
PF3D7_0419000	2.42015219536378	1.26987708258006	5.81363768873792	0.0159023666881542	0.310041314671806
PF3D7_1457900	-1.80301807876656	1.87875567997136	5.77723617909632	0.0162350506211374	0.314796242730496
PF3D7_0206900.1	2.48484660776292	2.57144608069579	5.76878790555473	0.0163132824761294	0.314796242730496
PF3D7_0206900.2	2.48484660776292	2.57144608069579	5.76878790555473	0.0163132824761294	0.314796242730496
PF3D7_0406800	2.87541358462113	2.10465742769522	5.74915827845565	0.0164965590590748	0.315782626109595
PF3D7_1242500	-3.04462446214254	1.43741059884352	5.7488470974113	0.0164994815076153	0.315782626109595
PF3D7_0913800	4.87842620686255	-0.203786538136307	5.71109981917871	0.0168579745741174	0.315782626109595
PF3D7_0309300	1.26136366227257	4.55790111301279	5.71057504090092	0.01686301472372	0.315782626109595
PF3D7_0900500	-4.55525380508964	-0.307293165193514	5.70829958953686	0.0168848869223833	0.315782626109595
PF3D7_0217300	-1.50607140321524	2.52407840294548	5.70662904805278	0.0169009632044179	0.315782626109595
PF3D7_0110900	-2.05070849935386	1.17955628039772	5.68784394517859	0.0170828305121521	0.315782626109595
PF3D7_1468000	4.87061032865869	0.34203305463601	5.68735288096912	0.0170876117195687	0.315782626109595
PF3D7_0925500	4.87061032865869	3.62251213964831	5.68735288096911	0.0170876117195688	0.315782626109595
PF3D7_0832200.1	-1.41600951298462	2.81454217453059	5.683661222538	0.0171235994861743	0.315782626109595
PF3D7_0832200.2	-1.41600951298462	2.81454217453059	5.683661222538	0.0171235994861743	0.315782626109595
PF3D7_1311200	-2.56891369675927	0.843716366151043	5.6681753750443	0.0172754158361701	0.315782626109595
PF3D7_1201400	4.86280610576159	0.236955162509763	5.66373639867263	0.0173191891822117	0.315782626109595
PF3D7_1319400	4.86280610576159	3.19352839768277	5.66373639867263	0.0173191891822117	0.315782626109595
PF3D7_1232800	4.86280610576159	2.2984181034122	5.66373639867262	0.0173191891822117	0.315782626109595
PF3D7_0827600	-3.01641790236961	2.31150135342248	5.65219065730115	0.0174335800941291	0.315782626109595
PF3D7_0219500	4.85890842187739	1.84672369930192	5.65197694885743	0.0174357047717724	0.315782626109595
PF3D7_1404200	4.85890842187739	-0.342862284344093	5.65197694885743	0.0174357047717724	0.315782626109595
PF3D7_0409200	1.34861307142827	3.82207024702787	5.64114310455378	0.0175437651589867	0.315782626109595
PF3D7_1103800	4.85501371965467	2.84128522202423	5.64024995653149	0.0175527044989874	0.315782626109595
PF3D7_1343500	4.85501371965467	2.39586617503844	5.64024995653149	0.0175527044989874	0.315782626109595
PF3D7_1004300	1.29619964407101	4.62395398746167	5.63339727149252	0.0176214482501827	0.315782626109595
PF3D7_1248000	-3.01072652869651	-0.133571993377565	5.63066092331438	0.0176489759198146	0.315782626109595
PF3D7_0208600	-2.55834857957244	2.52964056187327	5.62174357037617	0.0177389929288151	0.316392006370728
PF3D7_1113000	2.86230651398535	0.487689013659003	5.60430112584423	0.0179164399495995	0.318552048663634
PF3D7_0511600	-4.50763878537445	-0.529555083732741	5.59521930231178	0.0180095564125994	0.319203861933659
PF3D7_0100400	-1.95335076053992	1.33997338621575	5.55658516039334	0.0184112933847893	0.323603767343574
PF3D7_0821400	1.29754047155265	4.16029717429678	5.55082056114416	0.0184720252797835	0.323603767343574
PF3D7_0215200	-4.487756783169	-0.553689913566934	5.54630703137037	0.0185197211635496	0.323603767343574
PF3D7_0218900	-1.64499983795383	1.26239403649708	5.54543257802076	0.0185289764860195	0.323603767343574
PF3D7_1118900	-2.33092921376355	0.230803056102781	5.54401669315442	0.0185439725184503	0.323603767343574
PF3D7_1421800	-2.32846564514571	0.810488079851965	5.51926002502266	0.0188082130353803	0.325375717849377
PF3D7_1429200	4.86823499597265	-0.442047994575224	5.51628049510207	0.0188402762808768	0.325375717849377
PF3D7_1104600	-4.46803425589719	-0.542026984653955	5.49815227960823	0.0190365781253393	0.325375717849377
PF3D7_0510600	-2.52939363464709	1.87694830706384	5.49208799874541	0.0191027160927166	0.325375717849377
PF3D7_1102600	-4.46127808945383	-0.234069654423003	5.48653882361997	0.0191634442949844	0.325375717849377
PF3D7_1138000	-4.46127808945383	-0.230089631278672	5.48653882361996	0.0191634442949845	0.325375717849377
PF3D7_1245300	-4.46127808945383	2.53048447495379	5.48653882361996	0.0191634442949845	0.325375717849377
PF3D7_1348600	-4.46127808945383	-0.188971177142656	5.48653882361996	0.0191634442949845	0.325375717849377
PF3D7_1371600	-4.46127808945383	0.353968506409639	5.48653882361996	0.0191634442949845	0.325375717849377
PF3D7_0831000	-1.38122113796766	1.62993008064406	5.46577698948547	0.0193924298456417	0.326755404143142
PF3D7_1203800	-1.41362136001956	1.93660183675091	5.44182879184459	0.0196600746011758	0.326755404143142
PF3D7_0412200	-4.44184200840644	-0.0106975228843536	5.43940420710941	0.0196873837744115	0.326755404143142
PF3D7_1310000	-4.44184200840644	0.130593122772862	5.43940420710941	0.0196873837744115	0.326755404143142
PF3D7_0323800	-1.42930394328875	2.55989546974729	5.42929317465862	0.0198016923135656	0.326755404143142
PF3D7_0909100	-4.42256235999212	-0.238272747117984	5.39299064256159	0.0202177914003014	0.326755404143142
PF3D7_1132900	-4.42256235999212	1.49513576639453	5.39299064256159	0.0202177914003014	0.326755404143142
PF3D7_1422000	-4.42256235999212	1.82076052650695	5.39299064256159	0.0202177914003014	0.326755404143142
PF3D7_1461700	-4.42256235999212	-0.109275169484328	5.39299064256159	0.0202177914003014	0.326755404143142
PF3D7_0419500	-2.50867100535151	0.763073291077811	5.39218966736325	0.0202270734600099	0.326755404143142
PF3D7_0207400	2.80904401604519	0.919889792883338	5.3823225237568	0.020341780627642	0.326755404143142
PF3D7_1245900	-1.85962711763108	0.966768397709049	5.38118867366883	0.0203550048562137	0.326755404143142
PF3D7_1304500	4.81689661336677	3.80022637803215	5.37416966839785	0.0204370665211554	0.326755404143142
PF3D7_1124600	-2.500581663895	3.45504516495144	5.36508587439321	0.0205437767246436	0.326755404143142
PF3D7_0308400	-1.14870239046652	10.2306042159988	5.36342756243414	0.0205633195789276	0.326755404143142
PF3D7_0203100	4.81257159829607	0.365192612532022	5.36180382516748	0.0205824736150535	0.326755404143142
PF3D7_0621800	1.1540980010208	8.59905388361633	5.35053279130485	0.0207159395373183	0.326755404143142
PF3D7_0207300	-4.40343882011946	-0.674381130389121	5.34728453338374	0.0207545697672809	0.326755404143142
PF3D7_0316500	-4.40343882011946	1.24282408119994	5.34728453338374	0.0207545697672809	0.326755404143142
PF3D7_0803300	-4.40343882011946	1.36312861573663	5.34728453338374	0.0207545697672809	0.326755404143142
PF3D7_1224100	-4.40343882011946	1.06722001645465	5.34728453338374	0.0207545697672809	0.326755404143142
PF3D7_1403300	-4.40343882011946	-0.437705047674573	5.34728453338374	0.0207545697672809	0.326755404143142
PF3D7_1425600	-4.40343882011946	-0.43665540065383	5.34728453338374	0.0207545697672809	0.326755404143142
PF3D7_0415800	-4.40343882011946	-0.0474652863783912	5.34728453338374	0.020754569767281	0.326755404143142
PF3D7_0102800	-2.93741152541812	0.874973332951607	5.34533258322812	0.0207778193761983	0.326755404143142
PF3D7_0820400	-2.93741152541812	0.467338077029407	5.34533258322812	0.0207778193761983	0.326755404143142
PF3D7_1342700	1.16924069265172	6.60515900444982	5.34304641648037	0.0208050840982545	0.326755404143142
PF3D7_1308400	-1.3237181371499	4.00938337690507	5.32661852720022	0.0210020944720847	0.328935850817638
PF3D7_0731100	1.16374868166517	7.00570751475633	5.31001673020527	0.0212031527125813	0.330535078373987
PF3D7_1319600	-2.55069790081865	-0.217439484367528	5.30854076857066	0.0212211237088357	0.330535078373987
PF3D7_0606300	-2.27932032030954	0.414240352464609	5.29405946956478	0.0213982834775105	0.332361061613179
PF3D7_1467700	-1.77542906360295	2.365987365575	5.28937469500128	0.02145592279604	0.332361061613179
PF3D7_1311300	2.34204043998992	3.12930660767485	5.2798770074245	0.0215732718266048	0.333265789365092
PF3D7_1311100	4.76662713591261	-0.285582954851485	5.23801382861165	0.0220984894043	0.340449207334911
PF3D7_1232200	4.75811276824885	1.55861603571081	5.21425236974209	0.022402477350321	0.343403592405253
PF3D7_0904800	4.74961302796538	3.64076832940375	5.19063672201998	0.0227088947981259	0.343403592405253
PF3D7_1450900	4.74961302796538	1.62390518309756	5.19063672201998	0.0227088947981259	0.343403592405253
PF3D7_0905300	4.74961302796538	-0.11572619776495	5.19063672201998	0.0227088947981259	0.343403592405253
PF3D7_0833400	4.74961302796538	0.024138444080946	5.19063672201997	0.022708894798126	0.343403592405253
PF3D7_1243700	4.74961302796538	0.314288123441054	5.19063672201997	0.022708894798126	0.343403592405253
PF3D7_0405500	-1.35788507695811	3.35792899727091	5.18961948311675	0.0227221908284678	0.343403592405253
PF3D7_0808400	-1.54757999027349	2.08225218914698	5.18549761984938	0.022776149124862	0.343403592405253
PF3D7_0525600	-2.99048946788516	1.25331550936227	5.17681299997826	0.0228902724731231	0.344206384476166
PF3D7_0630500	-1.67182223461217	1.53127922103234	5.16645431442895	0.0230271699950247	0.344722102498368
PF3D7_1112000	-1.36192706164941	3.09909341674945	5.16433698828302	0.0230552563025199	0.344722102498368
PF3D7_1130500	-2.25043980934143	2.05283207755568	5.16021743551618	0.0231100039341349	0.344722102498368
PF3D7_0627500	1.13781653936795	7.90352700441904	5.15170271297483	0.023223589666178	0.344722102498368
PF3D7_1357000	1.12881463028221	9.21210390960643	5.14920991025694	0.0232569528728679	0.344722102498368
PF3D7_0510900	-1.49481271018198	3.00932979951122	5.14281102076613	0.0233428221183662	0.344722102498368
PF3D7_0727300	-1.54206208055713	2.05475993135961	5.14217643890935	0.0233513557228289	0.344722102498368
PF3D7_0923100	2.28818025294626	0.66865754273913	5.12401422658018	0.0235969701673206	0.347440805536539
PF3D7_0823700	-1.32554133346412	2.59673390283567	5.11309397146239	0.023745937181524	0.348726048894381
PF3D7_1444900	4.71742003701231	0.514628353539706	5.1075302582971	0.0238222084764391	0.348939810170432
PF3D7_1438800	4.71322815602299	0.0899779957956823	5.09607906525295	0.0239799903020335	0.350343320846763
PF3D7_0323600	-1.91447695681596	1.76833115039957	5.08838708180387	0.024086583701237	0.350993670739159
PF3D7_0831200	1.43377602236462	3.01667491859777	5.06603735051674	0.0243990984383558	0.354187048357072
PF3D7_0222300	4.69649925287573	-0.479929091332734	5.05062643092678	0.0246170368447629	0.354187048357072
PF3D7_1121500	4.69649925287573	0.622026938860148	5.05062643092678	0.0246170368447629	0.354187048357072
PF3D7_1136500.1	1.14399244522379	6.5460840472765	5.05049218965999	0.0246189441111301	0.354187048357072
PF3D7_1136500.2	1.14399244522379	6.5460840472765	5.05049218965999	0.0246189441111301	0.354187048357072
PF3D7_0625500	-1.81214045586045	1.06426796907761	4.99034988976033	0.0254890543511151	0.357187635938141
PF3D7_1117600.1	4.66926463668597	2.42799040777294	4.98244574815031	0.0256057592852153	0.357187635938141
PF3D7_1117600.2	4.66926463668597	2.42799040777294	4.98244574815031	0.0256057592852153	0.357187635938141
PF3D7_0218100	4.66926463668597	0.0106763333250505	4.98244574815032	0.0256057592852153	0.357187635938141
PF3D7_1416200	4.66926463668597	0.67219528029099	4.98244574815032	0.0256057592852153	0.357187635938141
PF3D7_1034800	4.66514056458916	2.32345972048063	4.97142365477389	0.0257694282662424	0.357187635938141
PF3D7_1020300	4.66102050102711	-0.287373134147547	4.96043561291992	0.0259336735863788	0.357187635938141
PF3D7_1032000	4.66102050102711	1.72460172655163	4.96043561291992	0.0259336735863788	0.357187635938141
PF3D7_1119000	4.66102050102711	2.19075661227661	4.96043561291992	0.0259336735863788	0.357187635938141
PF3D7_1117000	4.66102050102711	0.138103565521238	4.96043561291992	0.0259336735863789	0.357187635938141
PF3D7_0302500	1.79126840033035	1.47010622214238	4.95499604941669	0.0260153843354888	0.357187635938141
PF3D7_0308500	1.36959359070162	5.36584261231081	4.95229265884045	0.026056092947591	0.357187635938141
PF3D7_0906800	-2.25253029580068	1.04527023079755	4.94685626133425	0.0261381566497653	0.357187635938141
PF3D7_1029800	4.65279248974699	2.24746699172431	4.93856137330197	0.0262638878246347	0.357187635938141
PF3D7_1129700	4.65279248974699	-0.194107291703933	4.93856137330197	0.0262638878246347	0.357187635938141
PF3D7_1335000	4.65279248974699	-0.586666962332647	4.93856137330197	0.0262638878246347	0.357187635938141
PF3D7_1437300	4.65279248974699	0.0151279840251928	4.93856137330197	0.0262638878246347	0.357187635938141
PF3D7_1354800	4.65279248974699	0.17417864430692	4.93856137330197	0.0262638878246347	0.357187635938141
PF3D7_1012700	1.57616115377953	3.36602751106167	4.93743374988842	0.026281028430846	0.357187635938141
PF3D7_1015700.1	2.70057461252005	0.783843659926346	4.92781826567554	0.0264276630926785	0.357187635938141
PF3D7_1015700.2	2.70057461252005	0.783843659926346	4.92781826567554	0.0264276630926785	0.357187635938141
PF3D7_1369000	-1.45592441241215	2.67426644919375	4.92665186950138	0.0264455081940861	0.357187635938141
PF3D7_1463000	-1.41556026078647	2.70516534388283	4.91980568895235	0.0265505030891194	0.357187635938141
PF3D7_0210500	4.64458078085218	0.807026994870772	4.91682240467756	0.0265963910028222	0.357187635938141
PF3D7_0629300	4.64458078085218	0.851756370426781	4.91682240467755	0.0265963910028223	0.357187635938141
PF3D7_0918600	4.64458078085218	0.575909099971181	4.91682240467755	0.0265963910028223	0.357187635938141
PF3D7_1333900	4.64458078085218	1.14829102444322	4.91682240467755	0.0265963910028223	0.357187635938141
PF3D7_1003100	4.64458078085218	2.05447933023717	4.91682240467756	0.0265963910028223	0.357187635938141
PF3D7_1333500	-2.05231640522365	1.35499922552158	4.89063954596252	0.027002681730862	0.361784745275578
PF3D7_1326800	2.68602118132573	1.29046035500031	4.88207080878551	0.0271370436928851	0.362725401984805
PF3D7_1117700	1.1362936311102	6.13812485672785	4.86821626503031	0.0273557624134897	0.364172379816267
PF3D7_0503400	2.02719366354267	4.64741919908138	4.86705881021977	0.0273741176904693	0.364172379816267
PF3D7_0829200	1.52637944060374	4.16951847789148	4.8516704668511	0.0276193717552198	0.366572600713645
PF3D7_0614800	-2.43390806026795	2.5938631516761	4.84299363738203	0.0277586667418565	0.367009649211146
PF3D7_1013500	-1.78042925283278	2.60562701484522	4.84137363774608	0.027784754547848	0.367009649211146
PF3D7_0730000	4.68357498708204	0.320777666622789	4.83751249857005	0.0278470356405344	0.367009649211146
PF3D7_1108500	2.00882596333802	2.89633798409642	4.80071907565515	0.0284478611144622	0.373402604357353
PF3D7_1475100	-1.35931974338968	1.62321428216856	4.79795601618122	0.028493522259493	0.373402604357353
PF3D7_0502700	2.0149070223697	1.88072796021806	4.78912892529216	0.0286399068621033	0.373402604357353
PF3D7_0822400	2.23414653612358	0.319124849324107	4.78729583175263	0.0286704041280212	0.373402604357353
PF3D7_1424400	1.11965077100587	6.12149617474607	4.78638720528054	0.0286855335210082	0.373402604357353
PF3D7_1432000	-1.79495078769734	1.29987777797416	4.78381803062159	0.0287283574275643	0.373402604357353
PF3D7_0520800	-1.60239876039212	2.72584711567086	4.77731217590858	0.0288370972406672	0.373956302290671
PF3D7_0626700	1.26390964174387	4.4091123943938	4.7699493636375	0.0289606774738856	0.37469947468501
PF3D7_1421000	1.18549175355882	4.21735857999317	4.75160071525196	0.0292710537469993	0.377850543117658
PF3D7_1324700	1.13840010174588	4.90069907272764	4.7474352910034	0.0293419951755071	0.377903509618034
PF3D7_0404500	-1.84760742859775	0.563306006164293	4.74008002780853	0.0294677004583164	0.37813788497912
PF3D7_1013300	-1.46583190424147	1.41451333154573	4.73854809663344	0.0294939524718415	0.37813788497912
PF3D7_0100300	1.57958359423567	2.05170066785701	4.72729775607637	0.0296874924799674	0.379758105162298
PF3D7_1009200	1.8609916342786	1.59718791200305	4.71651698595625	0.0298741961183624	0.381283758133682
PF3D7_0606800	4.62892869476831	1.17506681411931	4.70425354774709	0.0300880651951629	0.383148469850114
PF3D7_0809500	1.56399209518559	2.14705017037492	4.69249442427025	0.0302946380510613	0.38491209784427
PF3D7_0725400	1.34147083851208	2.24677943474228	4.6861100904666	0.0304074104396986	0.385478696470977
PF3D7_0510000	-2.38805736999843	0.443714252004968	4.67709873100447	0.0305673316679191	0.386639134788399
PF3D7_1339100	-1.37425194294724	2.96954076765084	4.67055565175716	0.0306839985373914	0.386817560702022
PF3D7_0607600	2.65064917510579	1.77374795287107	4.66863865487259	0.0307182675548652	0.386817560702022
PF3D7_1123900	1.10229457439426	5.9802427123575	4.65860149962707	0.0308983484360397	0.388220582349707
PF3D7_1432800	1.85498083009267	1.97432486955419	4.65028600540374	0.0310483739455462	0.388834874869591
PF3D7_1464300	1.56050095031651	1.33510893333944	4.6482742680733	0.0310847830635047	0.388834874869591
PF3D7_0916800	-1.69721226181137	2.50103679363712	4.63571972735474	0.0313130078170479	0.390825046793795
PF3D7_1123100	1.32644601599816	3.6090959956511	4.62964603210401	0.0314240460990146	0.391347041065702
PF3D7_1208100	-1.19804136773096	3.62521896645674	4.61322166641499	0.0317263756588005	0.394243797746941
PF3D7_1335100	1.57377674466908	1.17622538940632	4.60787059000849	0.0318255291168771	0.394608643918472
PF3D7_1227800	1.17217378858056	4.34699189365618	4.6026269748558	0.0319230050623656	0.394951139217977
PF3D7_0920400	-1.94341754667387	1.14378239073052	4.59643071733928	0.0320385918319771	0.395515716633184
PF3D7_0111600	-1.46740428872104	1.78823437589472	4.57886764433601	0.0323685981944338	0.398311771405067
PF3D7_0517000	1.07175111771625	7.57997165917482	4.57688992736384	0.0324059806944342	0.398311771405067
PF3D7_1203300	-2.15659002506197	0.803270040275147	4.555547426474	0.0328122729024668	0.401804691943699
PF3D7_1214000	4.56632200955538	1.71963889107397	4.55450307265205	0.0328322900031817	0.401804691943699
PF3D7_0804200	-1.7221293159753	0.752822404508732	4.54677017659318	0.032980903550477	0.402751681802153
PF3D7_0506300	-2.79221073289385	1.12261182048612	4.53042195219064	0.0332974068157707	0.405472631985935
PF3D7_1472600	-1.67638120556593	1.20288261069232	4.52786746361284	0.0333471478375415	0.405472631985935
PF3D7_0111900	-1.59179550980359	3.87239479349234	4.50496696316047	0.0337965490576808	0.410055125262076
PF3D7_1021000	2.6038089307303	3.55738344995884	4.49304021338685	0.0340331022495794	0.411052936462242
PF3D7_0727200	1.16854395645759	4.56699190758182	4.48962336064081	0.0341011899297606	0.411052936462242
PF3D7_0709400	-1.80661192122393	1.87234359089451	4.48789806607875	0.0341356239800365	0.411052936462242
PF3D7_1027400	1.09481638337186	5.87387895747354	4.48619784129183	0.0341695932326236	0.411052936462242
PF3D7_1332300	-1.4762848534886	1.9033865508017	4.47484322807393	0.0343973579417632	0.412254593362065
PF3D7_1306400	1.19204956831802	4.46090791919245	4.47371434371541	0.0344200890555846	0.412254593362065
PF3D7_1002100	1.07496217133361	6.45221422662917	4.47033521764118	0.0344882247365151	0.412254593362065
PF3D7_0321500	-2.00070106979769	1.73334899244096	4.46475862361196	0.0346009780390569	0.412729809773898
PF3D7_1463300	4.52341123692467	0.926685609218562	4.45567020972697	0.0347855635621908	0.413884539633247
PF3D7_1330000.1	1.27758863940965	3.57339168576655	4.44921028169119	0.0349173904147611	0.413884539633247
PF3D7_1330000.2	1.27758863940965	3.57339168576655	4.44921028169119	0.0349173904147611	0.413884539633247
PF3D7_1238500	-1.21154226117226	3.71864069580669	4.4264288137852	0.0353864742243068	0.418029387645559
PF3D7_0625300	2.60783913357601	1.64525645691906	4.42474079941255	0.0354214927100499	0.418029387645559
PF3D7_1115500	1.56817569133153	3.27242572626803	4.42149758360387	0.0354888762062023	0.418029387645559
PF3D7_0912500	1.06967095558654	6.34906202077597	4.39933726914601	0.0359528994470484	0.422288985495945
PF3D7_1363900	-1.37349533624259	1.83200457592461	4.39711058306844	0.0359998746036515	0.422288985495945
PF3D7_0935100	-2.11699733084175	1.1112687787415	4.38856648645044	0.0361807216252046	0.422706391639798
PF3D7_1103400	-1.94281666828507	2.15666532937718	4.38836570045126	0.0361849829419282	0.422706391639798
PF3D7_1427900	1.22907840581274	5.75069090100196	4.38048410193147	0.0363526712331547	0.423789697221148
PF3D7_0320500	-1.22234771303535	2.0752526001727	4.37161403369296	0.0365423634571184	0.42512453289413
PF3D7_0111200	-2.74112295501552	0.425118430437217	4.36443526170751	0.0366966448534774	0.426042772077128
PF3D7_0808100	-1.38706929171324	2.73519949775783	4.34117634132716	0.0372012122228987	0.431015684238256
PF3D7_1008000	-1.21140285305076	3.74215656887395	4.32953868507474	0.0374563960831726	0.432170780370464
PF3D7_1013700	4.46805741451145	1.8139291149414	4.32930972334537	0.0374614349789033	0.432170780370464
PF3D7_1330500	2.15451388331216	1.55970941379489	4.32618751806224	0.0375302181043329	0.432170780370464
PF3D7_0936700	4.46361532029511	-0.480998906366406	4.31894933376585	0.0376901869243801	0.432542813957192
PF3D7_1211800	1.03321746270967	8.30184038404132	4.31487045177312	0.0377806475869533	0.432542813957192
PF3D7_0828100	-2.72426800335882	0.713058065411364	4.31058828212648	0.0378758615590639	0.432542813957192
PF3D7_1470700	-2.72426800335882	0.568780244606571	4.31058828212648	0.0378758615590639	0.432542813957192
PF3D7_1403100	4.45474730790115	1.74496753449202	4.29833718087692	0.0381496559945514	0.432542813957192
PF3D7_0512000	1.12823721950519	4.57231396603742	4.28727768522151	0.0383986015033929	0.432542813957192
PF3D7_0311500	-1.14015671272188	3.90734245146595	4.28220505643375	0.0385133537678337	0.432542813957192
PF3D7_1102300	-1.20275982996663	2.08830590419553	4.27894259404722	0.0385873466366763	0.432542813957192
PF3D7_0411600	-1.27433442717334	3.34661281691855	4.27687774156949	0.0386342546355665	0.432542813957192
PF3D7_0730400	2.14293040507918	1.13305018950139	4.27634247891571	0.0386464241456713	0.432542813957192
PF3D7_0714500	-1.91644199382539	1.90659576860554	4.26914105230342	0.0388105441725561	0.432542813957192
PF3D7_0316100	-2.71215236714345	1.31552404522226	4.26829530942979	0.0388298664939184	0.432542813957192
PF3D7_0533100	-2.35339926519334	1.09413899724189	4.26819372537794	0.0388321880192724	0.432542813957192
PF3D7_0728000	1.08787591287847	5.32120248530696	4.26089719591423	0.03899931868572	0.432542813957192
PF3D7_1303400	1.15198106322666	4.02939792515811	4.24184651490043	0.0394392501686057	0.432542813957192
PF3D7_1041200	-1.94577479044865	-0.0327573639385518	4.22929188565546	0.0397320137627969	0.432542813957192
PF3D7_0720900	2.12109958950911	2.84200539762603	4.22880398482497	0.0397434371324377	0.432542813957192
PF3D7_1332000	1.13218438312228	3.97657380924038	4.22746460737587	0.0397748141006915	0.432542813957192
PF3D7_0800900	4.41843905380297	1.06838995659226	4.21891976670415	0.0399756029649266	0.432542813957192
PF3D7_1362000	4.41843905380297	2.02691123806951	4.21891976670415	0.0399756029649266	0.432542813957192
PF3D7_0408700	4.41843905380297	-0.218952910903184	4.21891976670415	0.0399756029649267	0.432542813957192
PF3D7_1020100	4.41843905380297	-0.330286099277267	4.21891976670415	0.0399756029649267	0.432542813957192
PF3D7_1372000	1.05763362971121	3.98524754603723	4.21823139906555	0.0399918246344185	0.432542813957192
PF3D7_0610000	4.41408042108739	1.71250013134877	4.20898111972263	0.0402104827500223	0.432542813957192
PF3D7_0723300	4.41408042108739	1.16758755126742	4.20898111972263	0.0402104827500223	0.432542813957192
PF3D7_0608100	2.54494273380208	2.31650650498638	4.20085216503957	0.0404036709150421	0.432542813957192
PF3D7_0105200	4.40972728275113	2.5086218753418	4.19907716731281	0.040445983965195	0.432542813957192
PF3D7_1202200	4.40972728275113	1.28028266885491	4.19907716731281	0.040445983965195	0.432542813957192
PF3D7_1421100	4.40972728275113	0.816666829310715	4.19907716731281	0.040445983965195	0.432542813957192
PF3D7_1130100	-1.07228440813887	4.91675513570444	4.18577628220214	0.0407645395989974	0.432542813957192
PF3D7_1200300	4.40103756695182	-0.41672707285301	4.17937291274061	0.0409188383997502	0.432542813957192
PF3D7_1402700	1.12679271037766	4.48118337632326	4.17605181996866	0.0409991065350255	0.432542813957192
PF3D7_1407400	-1.56166999380998	2.10133378772438	4.17405159259006	0.0410475301909637	0.432542813957192
PF3D7_0302000	1.08783026905898	4.51093230025794	4.17357541774696	0.0410590667929048	0.432542813957192
PF3D7_1457600	-1.4359364929709	2.16577860753948	4.16938155041051	0.0411608215772549	0.432542813957192
PF3D7_1449700	-1.59041417144403	1.92731331057157	4.16866948888117	0.0411781244385551	0.432542813957192
PF3D7_1303600	-1.33819047491983	1.65023141255975	4.16630944599309	0.0412355273483634	0.432542813957192
PF3D7_1017500	1.43732727075039	2.08823702561785	4.15471142163805	0.0415188481222184	0.432542813957192
PF3D7_0916700	1.02128183987161	6.88537562555272	4.14675755810024	0.0417143296191893	0.432542813957192
PF3D7_1444100	-1.79368622493886	0.971073501887819	4.13968803848778	0.041888888440629	0.432542813957192
PF3D7_1013000	-1.35039937777811	1.15154032574999	4.13366159729089	0.0420382978837154	0.432542813957192
PF3D7_1242700	1.01059086796191	8.39189016747385	4.12387897117502	0.0422820255354663	0.432542813957192
PF3D7_1241500	-2.30883164892633	1.03404218718092	4.12252680083767	0.0423158306180282	0.432542813957192
PF3D7_0322900	1.00895017801437	8.35782287935477	4.1128828051644	0.0425577618465262	0.432542813957192
PF3D7_1033700	1.09235278010584	4.48252280606254	4.04691143636066	0.0442522379204684	0.432542813957192
PF3D7_0511900	-1.4250351585996	0.737659086816465	4.04349568852318	0.0443418818681044	0.432542813957192
PF3D7_1357100	0.998251024484022	8.94604083060784	4.04317342417023	0.0443503493359023	0.432542813957192
PF3D7_1202800	-2.28744531599009	1.21562330881164	4.03625992695151	0.0445324113896446	0.432542813957192
PF3D7_0826800	-1.15378836626528	2.7345141584688	4.02027235939627	0.0449564529712721	0.432542813957192
PF3D7_0512200	-1.40423700392376	2.08340632489985	4.01752952162351	0.0450296280743842	0.432542813957192
PF3D7_1252600	1.07673723409515	4.93475750783962	4.01494476325302	0.0450987006385531	0.432542813957192
PF3D7_0413900	1.48046690441606	2.83246292250326	4.01316680645826	0.0451462777917798	0.432542813957192
PF3D7_0811800	-2.27542742264322	0.256313478043475	4.00288279297147	0.0454225115695896	0.432542813957192
PF3D7_1332100	-2.27542742264322	0.00346633767239634	4.00288279297147	0.0454225115695896	0.432542813957192
PF3D7_0217100	2.07802293692336	2.04500707417451	3.99887278861179	0.0455307042341752	0.432542813957192
PF3D7_1417500	1.11007364957505	3.92613966666824	3.99829992110096	0.0455461827397008	0.432542813957192
PF3D7_1453000	-1.43970047932877	1.74224799091982	3.9978860740684	0.0455573680645924	0.432542813957192
PF3D7_0729000	1.10694470538831	4.10672637402685	3.99282000195426	0.0456945270172919	0.432542813957192
PF3D7_0728900	1.22513859168145	3.42651571118369	3.99072683332391	0.045751324461259	0.432542813957192
PF3D7_1134500	-1.27329959019092	1.93313451093928	3.99002559032341	0.0457703690896446	0.432542813957192
PF3D7_1344700	-1.19319977263859	2.26835249334585	3.98218795018418	0.045983796062135	0.432542813957192
PF3D7_1453400	-1.5248704652232	1.98025020458276	3.97662858676431	0.0461358188149427	0.432542813957192
PF3D7_0609100	1.02527646709861	5.54549619306858	3.96399590196291	0.0464832367765825	0.432542813957192
PF3D7_0815800	1.23881884461861	3.02130597541709	3.94869029608686	0.0469078626259658	0.432542813957192
PF3D7_0527600	1.19718259477461	3.61521256195879	3.93294400462177	0.0473489854670609	0.432542813957192
PF3D7_0114100	-4.00503192076928	0.213717578884405	3.90118338716051	0.0482521084562286	0.432542813957192
PF3D7_0400500	-4.00503192076928	-0.520763204090825	3.90118338716051	0.0482521084562286	0.432542813957192
PF3D7_0411300	-4.00503192076928	1.30352460476041	3.90118338716051	0.0482521084562286	0.432542813957192
PF3D7_0522100	-4.00503192076928	-0.232482003383324	3.90118338716051	0.0482521084562286	0.432542813957192
PF3D7_0900300	-4.00503192076928	-0.576091083933696	3.90118338716051	0.0482521084562286	0.432542813957192
PF3D7_0920700	-4.00503192076928	0.840247402947144	3.90118338716051	0.0482521084562286	0.432542813957192
PF3D7_1038500	-4.00503192076928	-0.595425510803133	3.90118338716051	0.0482521084562286	0.432542813957192
PF3D7_1207300	-4.00503192076928	-0.233272689487784	3.90118338716051	0.0482521084562286	0.432542813957192
PF3D7_1335800	-4.00503192076928	1.07928986171914	3.90118338716051	0.0482521084562286	0.432542813957192
PF3D7_1362900	-4.00503192076928	0.170638263531856	3.90118338716051	0.0482521084562286	0.432542813957192
PF3D7_1366200	-4.00503192076928	1.49512961440537	3.90118338716051	0.0482521084562286	0.432542813957192
PF3D7_1400900	-4.00503192076928	-0.754305061555297	3.90118338716051	0.0482521084562286	0.432542813957192
PF3D7_1430900	-4.00503192076928	1.49114940172285	3.90118338716051	0.0482521084562286	0.432542813957192
PF3D7_1452500	-4.00503192076928	0.535999363509744	3.90118338716051	0.0482521084562286	0.432542813957192
PF3D7_1477200	-4.00503192076928	-0.499484079727796	3.90118338716051	0.0482521084562286	0.432542813957192
PF3D7_0221900	-4.00503192076928	-0.596996091066512	3.90118338716051	0.0482521084562287	0.432542813957192
PF3D7_1318600	-4.00503192076928	0.526673287811277	3.90118338716051	0.0482521084562287	0.432542813957192
PF3D7_1314000	-4.00503192076928	0.788082896650586	3.9011833871605	0.0482521084562288	0.432542813957192
PF3D7_0209900	-1.59843395606254	0.750951315022418	3.89159678739885	0.0485282640223497	0.432542813957192
PF3D7_0732900	-2.24225449447594	0.407923306830921	3.8863355232543	0.0486805307568618	0.432542813957192
PF3D7_0611800	-1.1545352650111	3.970431737706	3.8822126809643	0.0488002027655712	0.432542813957192
PF3D7_1401400	0.981853402469412	7.92432176847891	3.87827007710117	0.0489149336254396	0.432542813957192
PF3D7_1317700	-1.23913777108651	2.00995743421625	3.87294813255937	0.0490702555711853	0.432542813957192
PF3D7_1003500	0.979414028203342	8.19963657143855	3.86738496913762	0.0492331744107237	0.432542813957192
PF3D7_1363100	-1.98392177708635	1.10632499437521	3.86172141376011	0.0493996201792805	0.432542813957192
PF3D7_0517800	1.6989558694531	0.632991518699901	3.85979065142727	0.0494564989514225	0.432542813957192
PF3D7_1456600	4.33700216305898	1.37449895332169	3.85607668728795	0.0495661040731938	0.432542813957192
PF3D7_1038700	4.33700216305898	0.0849570666923593	3.85607668728794	0.0495661040731939	0.432542813957192
PF3D7_0921700	4.33700216305898	1.36471350828628	3.85607668728794	0.0495661040731939	0.432542813957192
PF3D7_1226800	2.04777059257653	1.80817612187496	3.83354514413245	0.0502365710387414	0.432542813957192
PF3D7_1328200	-3.95590453748073	0.903786013075448	3.82053814572975	0.0506279751170595	0.432542813957192
PF3D7_1471300	-3.95590453748073	1.8072126148711	3.82053814572974	0.0506279751170595	0.432542813957192
PF3D7_1001000	-1.15275643359998	2.67561008789493	3.81949712645798	0.0506594402716404	0.432542813957192
PF3D7_1138900	-2.02294375724462	0.065844327218453	3.81571349827262	0.0507739759140513	0.432542813957192
PF3D7_1119300	1.07041587147335	4.98832253588785	3.81415949825699	0.0508210969155115	0.432542813957192
PF3D7_0314500	-1.31524188856839	1.70362517331019	3.8089034340673	0.0509808163067335	0.432542813957192
PF3D7_1307400	-2.21609875648299	-0.138733880833537	3.80351232099742	0.0511451909953748	0.432542813957192
PF3D7_0727900	-1.1079712356543	3.14757100043958	3.80058824233955	0.0512345802934897	0.432542813957192
PF3D7_1436400	-2.2122462114965	0.543984786042667	3.79862188976987	0.0512947847306201	0.432542813957192
PF3D7_0925400	2.42866646362366	2.93691350856281	3.79149083376489	0.0515137469462766	0.432542813957192
PF3D7_1419000	-1.83853676382292	1.13673801360496	3.78975982732376	0.0515670472287987	0.432542813957192
PF3D7_0102300	-3.9345994680192	2.70842416035761	3.78469769421349	0.0517232528946649	0.432542813957192
PF3D7_0111100	-3.9345994680192	-0.52096516164854	3.78469769421349	0.0517232528946649	0.432542813957192
PF3D7_1112200	-3.9345994680192	0.908082040396367	3.78469769421349	0.0517232528946649	0.432542813957192
PF3D7_0935000	1.06127068088199	3.91429796303589	3.76901792198169	0.0522102789328429	0.432542813957192
PF3D7_1111300	-1.74063427566611	0.389050708563784	3.76654626261971	0.052287492275936	0.432542813957192
PF3D7_0213700	1.01055688698346	5.68484841392171	3.7594826842277	0.0525088216591451	0.432542813957192
PF3D7_1225500	-1.26601978333296	1.87454175126539	3.75579167589418	0.0526248695444209	0.432542813957192
PF3D7_1237900	1.05991564270898	4.83985276082429	3.75372581304818	0.052689940182296	0.432542813957192
PF3D7_1008900	1.02278655104589	4.94094343578811	3.75238839340508	0.0527321116966184	0.432542813957192
PF3D7_0803900	-1.70985892833444	1.46724891474143	3.74952675631047	0.0528224648934127	0.432542813957192
PF3D7_0211300	-3.90819988505221	2.40432933954942	3.74324828620086	0.0530212757724819	0.432542813957192
PF3D7_0504100	-3.90819988505221	1.43693940664325	3.74324828620086	0.0530212757724819	0.432542813957192
PF3D7_1243000	-3.90819988505221	0.353757099469189	3.74324828620086	0.0530212757724819	0.432542813957192
PF3D7_1310200	-3.90819988505221	-0.545815126236993	3.74324828620086	0.0530212757724819	0.432542813957192
PF3D7_1369100	-3.90819988505221	0.471359429633403	3.74324828620086	0.0530212757724819	0.432542813957192
PF3D7_1403200	-3.90819988505221	-0.117300102154872	3.74324828620086	0.0530212757724819	0.432542813957192
PF3D7_1240700	-3.90819988505221	-0.810974257167342	3.74324828620085	0.0530212757724819	0.432542813957192
PF3D7_0106000	-3.90819988505221	0.787960229462172	3.74324828620085	0.0530212757724819	0.432542813957192
PF3D7_0106200	-3.90819988505221	0.31376899636864	3.74324828620085	0.0530212757724819	0.432542813957192
PF3D7_0311000	-3.90819988505221	-0.678861592110945	3.74324828620085	0.0530212757724819	0.432542813957192
PF3D7_0522900	-3.90819988505221	-0.293479731174821	3.74324828620085	0.0530212757724819	0.432542813957192
PF3D7_0605300	-3.90819988505221	1.08032304757072	3.74324828620085	0.0530212757724819	0.432542813957192
PF3D7_0613300	-3.90819988505221	-0.343822549722905	3.74324828620085	0.0530212757724819	0.432542813957192
PF3D7_0722800	-3.90819988505221	-0.601719296553742	3.74324828620085	0.0530212757724819	0.432542813957192
PF3D7_0826300	-3.90819988505221	0.925548692437095	3.74324828620085	0.0530212757724819	0.432542813957192
PF3D7_0917300	-3.90819988505221	-0.645858834545981	3.74324828620085	0.0530212757724819	0.432542813957192
PF3D7_0920000	-3.90819988505221	-0.359464918510744	3.74324828620085	0.0530212757724819	0.432542813957192
PF3D7_1023500	-3.90819988505221	0.145874315810169	3.74324828620085	0.0530212757724819	0.432542813957192
PF3D7_1026400	-3.90819988505221	-0.634707958563633	3.74324828620085	0.0530212757724819	0.432542813957192
PF3D7_1030800	-3.90819988505221	-0.494456880439663	3.74324828620085	0.0530212757724819	0.432542813957192
PF3D7_1038300	-3.90819988505221	-0.305205718999721	3.74324828620085	0.0530212757724819	0.432542813957192
PF3D7_1039100	-3.90819988505221	-0.0940234865607283	3.74324828620085	0.0530212757724819	0.432542813957192
PF3D7_1040900	-3.90819988505221	-0.6984112529535	3.74324828620085	0.0530212757724819	0.432542813957192
PF3D7_1100500	-3.90819988505221	-0.28509218614741	3.74324828620085	0.0530212757724819	0.432542813957192
PF3D7_1112300	-3.90819988505221	1.01465861853893	3.74324828620085	0.0530212757724819	0.432542813957192
PF3D7_1143000	-3.90819988505221	-0.222111623661912	3.74324828620085	0.0530212757724819	0.432542813957192
PF3D7_1149800	-3.90819988505221	-0.243482146503915	3.74324828620085	0.0530212757724819	0.432542813957192
PF3D7_1150000	-3.90819988505221	-0.517735381692512	3.74324828620085	0.0530212757724819	0.432542813957192
PF3D7_1206500	-3.90819988505221	-0.232164240409975	3.74324828620085	0.0530212757724819	0.432542813957192
PF3D7_1220000	-3.90819988505221	-0.444204635711856	3.74324828620085	0.0530212757724819	0.432542813957192
PF3D7_1228000	-3.90819988505221	1.23789439708385	3.74324828620085	0.0530212757724819	0.432542813957192
PF3D7_1228500	-3.90819988505221	1.38822053380497	3.74324828620085	0.0530212757724819	0.432542813957192
PF3D7_1310100	-3.90819988505221	-0.170938717719849	3.74324828620085	0.0530212757724819	0.432542813957192
PF3D7_1318000	-3.90819988505221	0.329758831464995	3.74324828620085	0.0530212757724819	0.432542813957192
PF3D7_1337600	-3.90819988505221	0.153481789164913	3.74324828620085	0.0530212757724819	0.432542813957192
PF3D7_1346900	-3.90819988505221	-0.154720710594072	3.74324828620085	0.0530212757724819	0.432542813957192
PF3D7_1427300	-3.90819988505221	1.75279595994929	3.74324828620085	0.0530212757724819	0.432542813957192
PF3D7_1448400	-3.90819988505221	1.96755481740197	3.74324828620085	0.0530212757724819	0.432542813957192
PF3D7_1452300	-3.90819988505221	-0.420914656946357	3.74324828620085	0.0530212757724819	0.432542813957192
PF3D7_1475900	-3.90819988505221	-0.606986932582887	3.74324828620085	0.0530212757724819	0.432542813957192
PF3D7_0101800	-3.90819988505221	-0.70482277715704	3.74324828620085	0.0530212757724821	0.432542813957192
PF3D7_0114800	-3.90819988505221	-0.752892525010938	3.74324828620085	0.0530212757724821	0.432542813957192
PF3D7_0201000	-3.90819988505221	-0.747504468691373	3.74324828620085	0.0530212757724821	0.432542813957192
PF3D7_0222000	-3.90819988505221	-0.679935953103991	3.74324828620085	0.0530212757724821	0.432542813957192
PF3D7_0403000	-3.90819988505221	-0.32128852882956	3.74324828620085	0.0530212757724821	0.432542813957192
PF3D7_0500500	-3.90819988505221	-0.690181276147279	3.74324828620085	0.0530212757724821	0.432542813957192
PF3D7_0500600	-3.90819988505221	-0.762373969828801	3.74324828620085	0.0530212757724821	0.432542813957192
PF3D7_0704800	-3.90819988505221	1.08810414581913	3.74324828620085	0.0530212757724821	0.432542813957192
PF3D7_0708600	-3.90819988505221	-0.481554996634593	3.74324828620085	0.0530212757724821	0.432542813957192
PF3D7_0829600	-3.90819988505221	-0.700426504720153	3.74324828620085	0.0530212757724821	0.432542813957192
PF3D7_0900600	-3.90819988505221	-0.701417224586235	3.74324828620085	0.0530212757724821	0.432542813957192
PF3D7_1013600	-3.90819988505221	2.18655469738227	3.74324828620085	0.0530212757724821	0.432542813957192
PF3D7_1040400	-3.90819988505221	-0.780628245538606	3.74324828620085	0.0530212757724821	0.432542813957192
PF3D7_1145700	-3.90819988505221	-0.630571315290224	3.74324828620085	0.0530212757724821	0.432542813957192
PF3D7_1254700	-3.90819988505221	-0.276695709586375	3.74324828620085	0.0530212757724821	0.432542813957192
PF3D7_1254800	-3.90819988505221	-0.377093026092892	3.74324828620085	0.0530212757724821	0.432542813957192
PF3D7_1434900	-3.90819988505221	-0.452792626003516	3.74324828620085	0.0530212757724821	0.432542813957192
PF3D7_0114500	-2.19599571761121	-0.344884357611857	3.74280995038062	0.0530351854474164	0.432542813957192
PF3D7_1365300	-1.63583892888068	1.054703784038	3.74089514934257	0.0530959929906006	0.432542813957192
PF3D7_0530100	-1.35212657084009	2.05054883543557	3.73861969397445	0.0531683496829957	0.432542813957192
PF3D7_0824200	4.27641133898584	2.26176625735275	3.73638392334306	0.0532395461496392	0.432542813957192
PF3D7_1010100	2.01692869218099	1.60288832682178	3.71719357176894	0.0538548174180145	0.432542813957192
PF3D7_1225400	-1.36907086259588	1.6762669193308	3.71468738736931	0.0539357237553266	0.432542813957192
PF3D7_0631000	-3.88744317302288	-0.247004336458564	3.70882139948551	0.0541255973880868	0.432542813957192
PF3D7_0601300	-3.88744317302288	-0.725922970472549	3.70882139948551	0.0541255973880872	0.432542813957192
PF3D7_0631300	-3.88744317302288	-0.753681673184526	3.70882139948551	0.0541255973880872	0.432542813957192
PF3D7_1428700	-1.59167076463192	1.24828635072965	3.69880509738177	0.0544514497780151	0.432542813957192
PF3D7_1317600	-1.38684215815973	1.62500321347176	3.69827875022392	0.0544686304008131	0.432542813957192
PF3D7_0933000	1.36943359412218	2.69411730650775	3.69164589454589	0.0546856280770807	0.432542813957192
PF3D7_0830500	0.983695449904222	6.46509224877479	3.68916784559446	0.0547669338159981	0.432542813957192
PF3D7_1305500	-2.17980624258273	0.285797134780516	3.68773060906128	0.0548141488006011	0.432542813957192
PF3D7_0323700	-1.26796231312338	2.64912248725585	3.68167790907791	0.0550134614324941	0.432542813957192
PF3D7_0918400	-1.98511406765657	0.412251603033682	3.68109242251555	0.0550327819493289	0.432542813957192
PF3D7_0931400	1.14225562810369	3.87298268045804	3.67677991420987	0.0551753125757741	0.432542813957192
PF3D7_0109100	-3.86689736001319	-0.607482141974158	3.67499230712652	0.0552345086093193	0.432542813957192
PF3D7_0304100	-3.86689736001319	-0.359817509261613	3.67499230712652	0.0552345086093193	0.432542813957192
PF3D7_0420200	-3.86689736001319	1.11034291966409	3.67499230712652	0.0552345086093193	0.432542813957192
PF3D7_0509500	-3.86689736001319	0.767534434465769	3.67499230712652	0.0552345086093193	0.432542813957192
PF3D7_0607700	-3.86689736001319	-0.213239822146276	3.67499230712652	0.0552345086093193	0.432542813957192
PF3D7_0620700	-3.86689736001319	-0.315072677962721	3.67499230712652	0.0552345086093193	0.432542813957192
PF3D7_0716700	-3.86689736001319	0.461754378769672	3.67499230712652	0.0552345086093193	0.432542813957192
PF3D7_0929900	-3.86689736001319	0.277398922120891	3.67499230712652	0.0552345086093193	0.432542813957192
PF3D7_1147000	-3.86689736001319	-0.449492550649018	3.67499230712652	0.0552345086093193	0.432542813957192
PF3D7_1212200	-3.86689736001319	0.308201197290678	3.67499230712652	0.0552345086093193	0.432542813957192
PF3D7_1330900	-3.86689736001319	-0.615001478059108	3.67499230712652	0.0552345086093193	0.432542813957192
PF3D7_1412100	-3.86689736001319	1.78270287691457	3.67499230712652	0.0552345086093193	0.432542813957192
PF3D7_1459300	-3.86689736001319	-0.355110757998464	3.67499230712652	0.0552345086093193	0.432542813957192
PF3D7_1476500	-3.86689736001319	-0.549392207692528	3.67499230712652	0.0552345086093193	0.432542813957192
PF3D7_0211500	-3.86689736001319	0.901622999273437	3.67499230712651	0.0552345086093193	0.432542813957192
PF3D7_0410500	-3.86689736001319	-0.673497989104789	3.67499230712651	0.0552345086093193	0.432542813957192
PF3D7_0701300	-3.86689736001319	-0.758120218870054	3.67499230712651	0.0552345086093193	0.432542813957192
PF3D7_0808800	-3.86689736001319	-0.704931219543234	3.67499230712651	0.0552345086093193	0.432542813957192
PF3D7_0937700	-3.86689736001319	0.228915763297258	3.67499230712651	0.0552345086093193	0.432542813957192
PF3D7_1012200	-3.86689736001319	-0.712904047874525	3.67499230712651	0.0552345086093193	0.432542813957192
PF3D7_1130800	-3.86689736001319	0.12413124285458	3.67499230712651	0.0552345086093193	0.432542813957192
PF3D7_1139700	-3.86689736001319	0.363763930379467	3.67499230712651	0.0552345086093193	0.432542813957192
PF3D7_1319900	-3.86689736001319	-0.433071988096362	3.67499230712651	0.0552345086093193	0.432542813957192
PF3D7_1320800	-3.86689736001319	2.56506690807574	3.67499230712651	0.0552345086093193	0.432542813957192
PF3D7_1339200	-3.86689736001319	-0.546768374881397	3.67499230712651	0.0552345086093193	0.432542813957192
PF3D7_1417900	-3.86689736001319	3.4111427451999	3.67499230712651	0.0552345086093193	0.432542813957192
PF3D7_1441700	-3.86689736001319	0.719939231920848	3.67499230712651	0.0552345086093193	0.432542813957192
PF3D7_1471600	-3.86689736001319	-0.568526438295411	3.67499230712651	0.0552345086093193	0.432542813957192
PF3D7_0221000	-3.86689736001319	-0.757562241672097	3.67499230712651	0.0552345086093195	0.432542813957192
PF3D7_0900700	-3.86689736001319	-0.753540579326319	3.67499230712651	0.0552345086093195	0.432542813957192
PF3D7_1216600	-3.86689736001319	-0.72627762407567	3.67499230712651	0.0552345086093195	0.432542813957192
PF3D7_0617600	-3.86689736001319	0.494400913141854	3.67499230712651	0.0552345086093195	0.432542813957192
PF3D7_1015500	-3.86689736001319	0.781862641084072	3.67499230712651	0.0552345086093195	0.432542813957192
PF3D7_1210800	-3.86689736001319	1.48155302989423	3.67499230712651	0.0552345086093195	0.432542813957192
PF3D7_1221600	-3.86689736001319	1.24188111469933	3.67499230712651	0.0552345086093195	0.432542813957192
PF3D7_1233000	-3.86689736001319	1.11641144762778	3.67499230712651	0.0552345086093195	0.432542813957192
PF3D7_1304000	-3.86689736001319	2.06055406271323	3.67499230712651	0.0552345086093195	0.432542813957192
PF3D7_1324100	-3.86689736001319	0.893502981059133	3.67499230712651	0.0552345086093195	0.432542813957192
PF3D7_1346000	-3.86689736001319	-0.626131614165424	3.67499230712651	0.0552345086093195	0.432542813957192
PF3D7_1360000	-3.86689736001319	1.3725624264951	3.67499230712651	0.0552345086093195	0.432542813957192
PF3D7_1460500	-3.86689736001319	1.71592688320224	3.67499230712651	0.0552345086093195	0.432542813957192
PF3D7_0311200	1.68909138563572	1.49076677046851	3.65879839436994	0.0557738434706508	0.436162255854855
PF3D7_0215300	1.14314556582726	2.7491566223436	3.65566022688898	0.0558790040360105	0.43634361277546
PF3D7_1208800	1.08778960289376	3.60004081998244	3.65023811992068	0.0560611957970092	0.43634361277546
PF3D7_1433400	-1.08656742460504	4.71950558213372	3.64928523855471	0.0560932792405324	0.43634361277546
PF3D7_1223600	-1.44761355965292	1.38555268995206	3.64717103903315	0.0561645337579054	0.43634361277546
PF3D7_0112100	4.22717961352411	-0.650382504184592	3.64205801093688	0.0563372545677548	0.43634361277546
PF3D7_0401900	4.22717961352411	-0.217935429242037	3.64205801093688	0.0563372545677548	0.43634361277546
PF3D7_0533000	4.22717961352411	0.210130844226206	3.64205801093688	0.0563372545677548	0.43634361277546
PF3D7_0324200	4.21750427256909	-0.295697519244999	3.62302794467025	0.0569850698862475	0.43750715907534
PF3D7_0519100	4.21750427256909	1.65384064433127	3.62302794467025	0.0569850698862475	0.43750715907534
PF3D7_0620400	4.21750427256909	-0.443661674164923	3.62302794467025	0.0569850698862475	0.43750715907534
PF3D7_0101900	4.21750427256909	-0.431560258386052	3.62302794467025	0.0569850698862475	0.43750715907534
PF3D7_0407900	4.21750427256909	1.37224444153546	3.62302794467025	0.0569850698862475	0.43750715907534
PF3D7_1320700	4.21750427256909	0.570640927253179	3.62302794467025	0.0569850698862475	0.43750715907534
PF3D7_1359100	-1.32432419651622	1.57175903295354	3.61444668633725	0.057279772700073	0.43750715907534
PF3D7_0303700	-2.15818092466012	3.27698866256199	3.61429776826166	0.057284901196841	0.43750715907534
PF3D7_0527800	-2.15818092466012	0.119829472696158	3.61429776826166	0.057284901196841	0.43750715907534
PF3D7_0727100	-2.15818092466012	2.28832642815927	3.61429776826167	0.0572849011968411	0.43750715907534
PF3D7_0215600	1.41912879462661	2.20818624385588	3.61273749624769	0.0573386637557175	0.43750715907534
PF3D7_1319200	2.39449461770857	0.0991384966069689	3.60239150467894	0.0576965156496954	0.439644338926385
PF3D7_1030700	-1.1515659888347	2.36024141558163	3.58828241713437	0.0581883550354894	0.442795369274101
PF3D7_0917600	1.12753059014879	3.64081367139243	3.57752027826778	0.0585665145474802	0.445074023187437
PF3D7_0109400	1.64246832416586	4.59986901672537	3.5719460368649	0.0587634078004007	0.445279987440523
PF3D7_1148900	0.94419500531402	7.01954582029847	3.57085346959786	0.0588020818300348	0.445279987440523
PF3D7_0907000	-1.0899662870303	3.72156898764512	3.57006737932891	0.0588299241069815	0.445279987440523
PF3D7_1344500	-2.58911309290088	-0.0051724437832196	3.56496630899669	0.0590109380934181	0.445279987440523
PF3D7_1465800	-1.36453016955118	1.24064358893973	3.55187231440971	0.0594783008716289	0.445279987440523
PF3D7_0214700	-2.58342171922779	-0.265457104774311	3.54979123636754	0.0595529423265461	0.445279987440523
PF3D7_1461100	-2.58342171922779	0.616348784329949	3.54979123636754	0.0595529423265461	0.445279987440523
PF3D7_0423000	4.17442669334735	0.617999944002265	3.5428016438983	0.0598043660844968	0.445279987440523
PF3D7_1415200	0.967072574457754	5.33771065469848	3.53511190062483	0.0600822798519191	0.445279987440523
PF3D7_0518600	4.16496026498006	0.316521241166914	3.52462612024645	0.060463460734114	0.445279987440523
PF3D7_0702100	1.48644840008185	0.731529537564415	3.52356867191349	0.0605020438461612	0.445279987440523
PF3D7_0623500	1.03707569744951	4.42910493305412	3.52271125440878	0.0605333476668109	0.445279987440523
PF3D7_1107400	1.76221558221181	3.74636691299691	3.52115905717412	0.0605900613445623	0.445279987440523
PF3D7_1466100	1.75607264268728	2.75663728057235	3.52058979097431	0.0606108751759484	0.445279987440523
PF3D7_1021300	4.16023818303687	1.39756534320058	3.51559270650207	0.0607939082625179	0.445279987440523
PF3D7_1121400	1.53409938521115	0.744836890235012	3.51254543974234	0.0609058121220831	0.445279987440523
PF3D7_0922900	-1.93887304667553	0.44414385100894	3.51212840861955	0.0609211436761023	0.445279987440523
PF3D7_0614000	-2.12625035136374	2.09623465924479	3.50864387834504	0.0610494081239713	0.445279987440523
PF3D7_0707500	-1.76708331286429	1.2342057259748	3.50407215456332	0.0612181279513692	0.445279987440523
PF3D7_0402400	-1.0511483291341	4.24914424076989	3.50396934094745	0.0612219279980092	0.445279987440523
PF3D7_1340500	-2.12468083835745	0.0956476934913149	3.50018288093324	0.0613620526681426	0.445279987440523
PF3D7_1345700	1.30623167936738	3.39147382317646	3.49845287694083	0.0614261881372	0.445279987440523
PF3D7_1323600	-2.11568523417691	3.04762205855184	3.47460378969745	0.0623176441215809	0.445279987440523
PF3D7_1412600	1.1135159115738	3.44276238007441	3.47346051147596	0.0623607234172459	0.445279987440523
PF3D7_1476400	1.16997659554458	2.66877819361315	3.47252073719189	0.0623961583401809	0.445279987440523
PF3D7_1138600	1.1698293927535	3.02407658702808	3.47154677587604	0.0624329049485818	0.445279987440523
PF3D7_1304700	1.96636651489478	2.13037936013827	3.46860381085577	0.0625440803004275	0.445279987440523
PF3D7_0211700	-2.55125103978084	1.55995201678804	3.46240565079262	0.062778916547835	0.445279987440523
PF3D7_0505000	-1.04773523718867	3.88365853265133	3.46116074746024	0.062826196726032	0.445279987440523
PF3D7_1423900	-1.59499220499688	0.606392367299106	3.45497300525926	0.0630617646849056	0.445279987440523
PF3D7_1358800	0.92897076479815	7.44749688195096	3.45303414523883	0.0631357708353932	0.445279987440523
PF3D7_1418100	4.12305815613889	-0.197915804590962	3.44829041737875	0.0633172292016387	0.445279987440523
PF3D7_0205200	4.12305815613889	-0.361238453312283	3.44829041737874	0.063317229201639	0.445279987440523
PF3D7_0729600	4.12305815613889	2.50160022348626	3.44829041737874	0.063317229201639	0.445279987440523
PF3D7_0807400	4.12305815613889	0.287600262358149	3.44829041737874	0.063317229201639	0.445279987440523
PF3D7_1031000	4.12305815613889	-0.229272664997315	3.44829041737874	0.063317229201639	0.445279987440523
PF3D7_1117500	4.12305815613889	0.506278121184768	3.44829041737874	0.063317229201639	0.445279987440523
PF3D7_1314700	4.12305815613889	2.77570319382346	3.44829041737874	0.063317229201639	0.445279987440523
PF3D7_0731000	-2.54555966610775	0.473221589909877	3.44745441156184	0.0633492659031982	0.445279987440523
PF3D7_1327600	-2.54555966610775	0.562870680258904	3.44745441156184	0.0633492659031982	0.445279987440523
PF3D7_0925000	4.11842399210424	0.729800340715158	3.43958856409989	0.0636515417944193	0.445279987440523
PF3D7_1362100	4.11842399210424	0.0480647700038212	3.43958856409989	0.0636515417944196	0.445279987440523
PF3D7_1432600	-1.46853582814815	1.2102898279029	3.43665909394813	0.0637645108124518	0.445279987440523
PF3D7_1148500	2.34075227562582	0.757414464679121	3.43274840866609	0.0639156517021866	0.445279987440523
PF3D7_0603500	4.11379724432671	0.883911369321716	3.43092118337893	0.0639864015559299	0.445279987440523
PF3D7_0320400	4.11379724432671	-0.375794880611965	3.43092118337893	0.06398640155593	0.445279987440523
PF3D7_0412100	4.11379724432671	2.1202941318635	3.43092118337893	0.06398640155593	0.445279987440523
PF3D7_0419700	4.11379724432671	-0.507389907796178	3.43092118337893	0.06398640155593	0.445279987440523
PF3D7_0817600	4.11379724432671	0.0418613744992954	3.43092118337893	0.06398640155593	0.445279987440523
PF3D7_0912600	4.11379724432671	-0.0875144848187261	3.43092118337893	0.06398640155593	0.445279987440523
PF3D7_0631100	4.11379724432671	-0.476763395996623	3.43092118337893	0.0639864015559303	0.445279987440523
PF3D7_0730500	4.11379724432671	1.09738551250195	3.43092118337893	0.0639864015559303	0.445279987440523
PF3D7_1111600	4.11379724432671	-0.119637504441751	3.43092118337893	0.0639864015559303	0.445279987440523
PF3D7_1318400	4.11379724432671	1.38215090766474	3.43092118337893	0.0639864015559303	0.445279987440523
PF3D7_1345600	4.11379724432671	-0.152578073725618	3.43092118337893	0.0639864015559303	0.445279987440523
PF3D7_1401900	4.11379724432671	0.00702979057492966	3.43092118337893	0.0639864015559303	0.445279987440523
PF3D7_1420100	4.11379724432671	-0.0220969465140448	3.43092118337893	0.0639864015559303	0.445279987440523
PF3D7_1447300	4.11379724432671	2.88039979991058	3.43092118337893	0.0639864015559303	0.445279987440523
PF3D7_0415600	2.33689498770382	0.710313403765435	3.42931324845709	0.0640487296123728	0.445279987440523
PF3D7_1434000	1.22519321598804	3.0847924127823	3.4291489862417	0.0640551005197062	0.445279987440523
PF3D7_1335300	1.93893881387328	1.08102462482057	3.42859923135365	0.0640764276707827	0.445279987440523
PF3D7_0107800	4.10917792538095	1.11845756707354	3.42228813406069	0.0643218031789738	0.445279987440523
PF3D7_1477600	4.10917792538095	-0.528956201852126	3.42228813406069	0.0643218031789738	0.445279987440523
PF3D7_0402900	4.10917792538095	-0.31796805979623	3.42228813406068	0.064321803178974	0.445279987440523
PF3D7_1234200	4.10917792538095	1.39458197572128	3.42228813406068	0.064321803178974	0.445279987440523
PF3D7_1340000	4.10917792538095	0.0379053227301725	3.42228813406068	0.064321803178974	0.445279987440523
PF3D7_1454300	4.10917792538095	0.365836809014731	3.42228813406068	0.064321803178974	0.445279987440523
PF3D7_1110200	1.01421330000807	4.64676547774026	3.42161107226053	0.0643481868158855	0.445279987440523
PF3D7_0727700	-2.1001454548396	0.612412936404649	3.41699374328097	0.064528422268797	0.445279987440523
PF3D7_0406900	4.10456604742128	0.181848272938649	3.41368927517703	0.0646577413669375	0.445279987440523
PF3D7_0603200	4.10456604742128	1.53981166906548	3.41368927517703	0.0646577413669375	0.445279987440523
PF3D7_0828000	4.10456604742128	-0.601208744781479	3.41368927517703	0.0646577413669375	0.445279987440523
PF3D7_1218700	4.10456604742128	-0.379310532121107	3.41368927517703	0.0646577413669375	0.445279987440523
PF3D7_1340200	4.10456604742128	-0.516622512701671	3.41368927517703	0.0646577413669375	0.445279987440523
PF3D7_1403600	4.10456604742128	1.49832764587867	3.41368927517703	0.0646577413669375	0.445279987440523
PF3D7_0402800	4.10456604742128	-0.162350107635295	3.41368927517703	0.0646577413669383	0.445279987440523
PF3D7_1233300	4.10456604742128	1.61133534635903	3.41368927517703	0.0646577413669383	0.445279987440523
PF3D7_0909300	0.935650833417199	6.11754403648024	3.40296110363003	0.0650794940097081	0.44763924468478
PF3D7_0708800	0.951956567268136	5.99685763998844	3.40006661806072	0.0651937860674916	0.447880518135598
PF3D7_0403300	-1.96922301549306	0.722380246731939	3.38959896184998	0.0656089051188899	0.450185375658014
PF3D7_0312800	0.918075617665254	7.7142731725682	3.3865133439075	0.0657318102321105	0.450482006124064
PF3D7_1357200	1.61323691123817	2.13173135166808	3.38246539695337	0.0658934193686285	0.451042848801726
PF3D7_1009000	1.15031097535448	2.9485922603568	3.37866161052862	0.0660456674135406	0.451538335618088
PF3D7_1353100	0.908359535693906	8.99149419018949	3.37638388306642	0.0661370141383177	0.451616760794745
PF3D7_0517600	1.59586715561997	0.530414995778054	3.35731805836899	0.0669069496876076	0.455785208568506
PF3D7_0621700	-1.64514977909551	1.59760634988607	3.35727527336504	0.0669086882051397	0.455785208568506
PF3D7_1342900	1.10603316395447	3.22516698047226	3.34966097451585	0.0672188562344235	0.457347067568508
PF3D7_0720400	1.38940649411597	2.23523422657867	3.34070705154085	0.0675855610485944	0.459289377606674
PF3D7_1202000	1.51373250586497	2.47107776263002	3.33151017787664	0.0679644431850892	0.461309677993391
PF3D7_0915000	-2.49221190248851	1.09651929453798	3.31686406051426	0.0685725132180537	0.464322143395064
PF3D7_1101600	-2.49221190248851	-0.329682454138522	3.31686406051425	0.0685725132180542	0.464322143395064
PF3D7_1000100	-1.17871647795009	2.99915454342228	3.30517155094486	0.0690621339758955	0.467078116626451
PF3D7_1133700	0.929247423075616	6.00764191945183	3.30089872683173	0.0692419894550787	0.467735015984486
PF3D7_1468700	0.89970725244604	8.23007391553539	3.28067374375918	0.0701001464223621	0.472966859035842
PF3D7_0917700	-1.24883867354958	1.54482045070543	3.27820586735244	0.0702056366881136	0.473114028408336
PF3D7_1122800	1.23488267157048	3.21917295345529	3.26878686082352	0.0706098208462747	0.475271341743854
PF3D7_1464500	-1.10402528144017	3.20216009904752	3.26578176315809	0.0707392981052292	0.475576684288901
PF3D7_0423900	1.28736074962984	1.87909406787035	3.26163111468452	0.070918550833531	0.476215542057939
PF3D7_0424300	1.89188956978033	1.63015289771082	3.25802179247447	0.0710748210706964	0.476698740609392
PF3D7_1038400	1.41846464193384	1.67055671397625	3.2528884911252	0.0712977097918358	0.477316626612575
PF3D7_0104900	-0.91413229274586	5.99198708266283	3.25201322347892	0.0713357887314513	0.477316626612575
PF3D7_1145100	-1.031931602979	3.18765493969912	3.24351721458745	0.071706546342141	0.478855669212393
PF3D7_1359400	0.990270276815287	4.69102426799351	3.24286284814369	0.0717351878003001	0.478855669212393
PF3D7_0506900	1.88614190717233	0.798170196161653	3.2370266765801	0.071991178707987	0.479506858346759
PF3D7_0515500	-2.46150586268707	-0.0794142692229783	3.23672365219529	0.0720044969271829	0.479506858346759
PF3D7_1149300	-1.85644466012806	1.35229455303657	3.23400323094751	0.0721241804891819	0.479506858346759
PF3D7_1223700	1.89037478233285	3.49232118652561	3.23291824920184	0.0721719731965143	0.479506858346759
PF3D7_1226900	-1.40772370252991	3.31234956422409	3.23004846093746	0.0722985491873548	0.479784034161155
PF3D7_0111700	-2.45581448901398	-0.48815146152792	3.2222583308928	0.0726433453961564	0.48094317900453
PF3D7_1203000	-2.45581448901398	1.4528920278982	3.2222583308928	0.0726433453961565	0.48094317900453
PF3D7_0806000	-1.06755860896456	2.70227428485348	3.21870397610179	0.0728012489750136	0.481424867490909
PF3D7_1224800	-2.03551505081638	0.75498130194556	3.2102629495512	0.0731777222358048	0.482785112626889
PF3D7_0206200	-2.03551505081638	0.75210706558628	3.2102629495512	0.0731777222358055	0.482785112626889
PF3D7_1350300	1.28398851430319	2.41731874645701	3.20400464953834	0.0734581932523304	0.48407065809869
PF3D7_0713200	-1.63270268968354	0.665268616589669	3.2013981609623	0.0735753453182643	0.484278233328831
PF3D7_0803500	-1.21587858873009	2.28466231753098	3.19927958625928	0.0736707151787028	0.48434212048882
PF3D7_1361100	0.926155759966668	5.52835168157371	3.19693599455385	0.0737763690060512	0.484473391823709
PF3D7_1445500	-1.02188155762564	2.56004462870464	3.18262273952471	0.0744251799180585	0.487032911675063
PF3D7_0601200	-2.44289010921425	1.62939375193371	3.18201058921552	0.0744530645657811	0.487032911675063
PF3D7_1115600	0.892315684937411	6.95536017298566	3.18189296732209	0.074458423758636	0.487032911675063
PF3D7_1424600	-0.987330674289273	3.14376795115265	3.180746214572	0.0745106948353253	0.487032911675063
PF3D7_0525500	-1.34376888543903	1.23395184203448	3.17798604186956	0.0746366701739426	0.487292994415094
PF3D7_0210400	-2.43778969933083	3.59091795589891	3.1760546150768	0.0747249572541693	0.487306699325344
PF3D7_0623000	-1.16716250833528	3.29212149788849	3.17245180246382	0.0748899446408202	0.487315044051548
PF3D7_0800100	1.01489389923307	3.43901139909599	3.172262688868	0.074898615719985	0.487315044051548
PF3D7_1447900	-1.11599861277583	4.18621989594173	3.16613890462291	0.0751799820896091	0.488583469809943
PF3D7_1008400	0.959519065569603	4.47685769428911	3.15473363660925	0.0757070458590493	0.491443900444392
PF3D7_1235900	1.02567451688879	3.44603083502754	3.15064143275474	0.0758971228762106	0.492112766906072
PF3D7_1455000	-2.42557305227639	-0.448683738908497	3.14482225383828	0.0761682992969386	0.492740920165783
PF3D7_1020500	-2.42557305227639	0.512399995261969	3.14482225383828	0.0761682992969393	0.492740920165783
PF3D7_0829100	0.945448204458253	4.59245110543646	3.13863754973217	0.0764576515880256	0.494047499518511
PF3D7_0613100	1.1423588757398	3.41178992141134	3.13150489684916	0.0767928221210803	0.495646822228982
PF3D7_1439000	-1.8255943998888	2.25689833314989	3.12699590004693	0.0770055193949924	0.496452915232939
PF3D7_1422400	-1.01217348258213	3.25937241112023	3.11967880372261	0.0773520293960668	0.498118877227063
PF3D7_1018500	0.937149713426274	5.08657492551914	3.11113507358966	0.0777587524778262	0.500168357803901
PF3D7_0717500	1.44932307653803	1.60620441544933	3.09778363506673	0.0783989617071377	0.503342165390994
PF3D7_1451300	-1.31349785080489	4.43383029094115	3.09713481694392	0.0784302171399832	0.503342165390994
PF3D7_1026600	1.38258363759029	1.43949645380495	3.09375766859674	0.0785931208821463	0.503815765836344
PF3D7_1370500	-1.453294740373	1.05613538073438	3.08812328745784	0.0788657184968374	0.504643321993812
PF3D7_0810700	-1.15331671640805	1.6331109178328	3.08740125928266	0.0789007245565139	0.504643321993812
PF3D7_1441000	-1.53034311460434	1.54308532747987	3.0832372691928	0.0791029339311006	0.505364958696545
PF3D7_0910600	1.01814275432643	3.92514818279867	3.08072967894423	0.0792249753738471	0.505573375579832
PF3D7_0813100	-2.39856284400654	-0.00549251402755027	3.07437124888136	0.0795353428043018	0.506981767999461
PF3D7_0322000	0.878595559137404	8.02142029188149	3.06708111166827	0.0798928015921246	0.508568288691381
PF3D7_0526800	0.914043536466764	4.84563166769057	3.06563055930157	0.0799641331175517	0.508568288691381
PF3D7_1353200	0.864693794233235	9.01021950992983	3.05650344151698	0.0804145408040287	0.510827863280639
PF3D7_1117300	-0.955062311503511	3.588689554948	3.05477567151912	0.080500110750451	0.510827863280639
PF3D7_0814600	2.23547463118511	-0.0468078825165427	3.04996911979351	0.0807386780365125	0.51114086658563
PF3D7_0628700	-2.05579188786078	0.761161182025899	3.0481763135564	0.0808278568788221	0.51114086658563
PF3D7_1104300	-1.67903151760488	2.46662576905906	3.04565348021012	0.0809535291200276	0.51114086658563
PF3D7_0107200	1.20022042342889	2.44859159742612	3.04516916139525	0.0809776790437869	0.51114086658563
PF3D7_1409500	-1.20900238564969	1.66620951707225	3.04469253036545	0.0810014532120135	0.51114086658563
PF3D7_1206100	-2.05488044428708	0.07562292131185	3.03979942595156	0.0812459551357187	0.512112185437406
PF3D7_0936800	0.867461307804528	6.76039431726985	3.03530715498836	0.0814711289692777	0.512959647207457
PF3D7_0930800	-1.56020652390126	2.45262392437509	3.03215444915407	0.0816295594761068	0.51338546082081
PF3D7_0416400	-1.11432716966802	3.21491231860745	3.0278314463223	0.0818473406509198	0.514183182267
PF3D7_0513500	-1.30107953588066	1.50042259011189	3.02229581012367	0.0821271269248886	0.514791948855588
PF3D7_0311300	-1.43671488481816	2.49580156562643	3.02035868895851	0.0822252780146382	0.514791948855588
PF3D7_1413700	2.22486210890775	1.38782391574447	3.0187193396579	0.0823084403546961	0.514791948855588
PF3D7_1024600	2.22486210890775	2.08578473257014	3.0187193396579	0.0823084403546961	0.514791948855588
PF3D7_0915900	-1.43667128472653	1.37647379902625	3.00295856625491	0.0831126155966311	0.519247213904256
PF3D7_1006600	2.24622885973615	2.70788998352665	2.99017981162405	0.0837708660835621	0.522781983263201
PF3D7_1371700	2.21323668446738	1.23250246246627	2.98628155451767	0.083972789913219	0.523119415191346
PF3D7_0207900	-2.36263003359585	-0.385122865028009	2.98496289090032	0.0840412136912304	0.523119415191346
PF3D7_1015300	1.12713716785979	3.13449956817264	2.98378271959913	0.0841025023715835	0.523119415191346
PF3D7_0911400	-1.12363189642408	2.28200044551316	2.9684930603483	0.0849009075461572	0.526492998449568
PF3D7_1139800	-1.25685487142617	1.80184938322048	2.96845138964705	0.0849030946974533	0.526492998449568
PF3D7_1423200	0.97975780426201	3.91631142095057	2.96642638934918	0.0850094534255386	0.526492998449568
PF3D7_1027800	0.85345488807776	8.38986020207372	2.96627611707293	0.0850173518897162	0.526492998449568
PF3D7_1214500	-1.24850909058626	1.05636022839895	2.95911934931544	0.0853944393983689	0.528073114507456
PF3D7_1343000	0.860831183086743	7.82706612699849	2.95789174271226	0.085459303108299	0.528073114507456
PF3D7_1004000	0.850301054222685	8.44064614004549	2.94703898742403	0.0860350598601553	0.53105046773943
PF3D7_1357900	0.870562461624104	6.01103588989028	2.93226767865242	0.0868254570254136	0.535344748115255
PF3D7_1022900	1.80080425311719	3.16690648165291	2.92617452573853	0.0871537821569682	0.536348274353612
PF3D7_1250500	1.51214321977282	2.86186574310265	2.92572720779233	0.0871779384738184	0.536348274353612
PF3D7_1322800	-2.01102853613613	1.01004727397907	2.92395247758023	0.0872738499312168	0.536354725555543
PF3D7_1347700	0.882600328806045	5.41780443137319	2.9200194214675	0.0874868109433145	0.537079727549946
PF3D7_1442400	-1.0938932134231	2.09690257342613	2.91582922511451	0.087714314596061	0.537892337013155
PF3D7_0215500	1.35092602246954	1.29607698427622	2.91027425092681	0.0880169063921184	0.53916315139874
PF3D7_1002900	1.04311972854518	3.35009926235721	2.90043171882495	0.0885558321791226	0.541877354048441
PF3D7_1123500	-0.890149888612287	4.5765944673666	2.89675552255284	0.0887580379787964	0.542527509980665
PF3D7_1330100	-2.00265983291182	1.02425108494178	2.89405164646791	0.0889070816242738	0.542538346684664
PF3D7_0910300	-0.99135400162166	2.95336108622397	2.89164931562779	0.0890397310706628	0.542538346684664
PF3D7_1369800	-0.931343459384217	3.00186714267524	2.8915054711961	0.0890476805311936	0.542538346684664
PF3D7_0511700	-1.34914378553572	0.38426140176002	2.88802064859657	0.0892405021213312	0.543127878357381
PF3D7_0406100	0.849138177863153	6.77365016207305	2.88107987980433	0.0896258978563815	0.54447908016978
PF3D7_0520400	-1.75370470530962	0.831169030186498	2.88055500451453	0.089655115606308	0.54447908016978
PF3D7_1402100	-1.35878123908967	1.40486085845273	2.87544383573345	0.0899401751245395	0.545624195444363
PF3D7_1109200	-1.67687531201122	-0.00080820518381308	2.86661746798139	0.0904347562188564	0.548036561266253
PF3D7_0934400	1.80276283253732	3.12694358005733	2.84690322888646	0.0915501268074479	0.554201731230525
PF3D7_1402500	-0.84676659797056	6.32010613338645	2.81305148147228	0.0935003696490259	0.565402235289404
PF3D7_0409700	1.38056364051402	2.59709697520267	2.80961100022278	0.0937010942214095	0.566010669581035
PF3D7_0624400	-0.958867299668277	3.29979443528504	2.80740440643665	0.093830077969886	0.566184910183282
PF3D7_1203100	1.24080723144082	1.9263774973092	2.80556219149279	0.093937910318087	0.566231284582584
PF3D7_1302100	1.13774271563261	2.24516809067723	2.7985311778268	0.0943507049933932	0.567135633866581
PF3D7_1000400	3.8489150204668	-0.697415072290691	2.79391325573995	0.0946228993326844	0.567135633866581
PF3D7_0629800	-0.991357718811272	2.55236498450399	2.78966654873069	0.0948739675249553	0.567135633866581
PF3D7_1453600	-1.78029761162892	1.8775751331244	2.78937970863768	0.0948909518263106	0.567135633866581
PF3D7_0209400	-1.07822108675375	2.83478920456256	2.78848102231182	0.0949441860392725	0.567135633866581
PF3D7_1120700	3.843716525256	-0.249091187461807	2.78600518668032	0.0950910118333068	0.567135633866581
PF3D7_1247000.1	3.843716525256	0.529211543827073	2.78600518668032	0.0950910118333068	0.567135633866581
PF3D7_1247000.2	3.843716525256	0.529211543827073	2.78600518668032	0.0950910118333068	0.567135633866581
PF3D7_0203400	3.843716525256	3.6645868896473	2.78600518668032	0.0950910118333072	0.567135633866581
PF3D7_1356100	3.843716525256	0.492955125555707	2.78600518668032	0.0950910118333072	0.567135633866581
PF3D7_1450300	-1.02724300142142	2.01340840632512	2.78120802662121	0.0953762043136609	0.568237154045773
PF3D7_0322500	-1.9566718796721	0.0336249521335516	2.77591946792963	0.0956916902666023	0.568299704643418
PF3D7_1329400	1.03137405680725	3.15699322822196	2.7741726674681	0.095796144175594	0.568299704643418
PF3D7_1126300	0.898491144605525	4.12171666408964	2.77186590033888	0.0959342728803414	0.568299704643418
PF3D7_0824800	-1.0106827564404	2.98039780734357	2.76140873332556	0.0965631725708407	0.568299704643418
PF3D7_1017300.1	-1.31733958154531	1.73418206524142	2.75743838684898	0.0968031267000544	0.568299704643418
PF3D7_1017300.2	-1.31733958154531	1.73418206524142	2.75743838684898	0.0968031267000544	0.568299704643418
PF3D7_0934000	-1.37111914759621	0.937095536525338	2.75137564952016	0.0971707924955012	0.568299704643418
PF3D7_1148700	0.841817452179978	5.0435266620289	2.75040761130355	0.0972296385444968	0.568299704643418
PF3D7_0929200	0.878091990415102	5.06569223300413	2.75029669267626	0.0972363836542191	0.568299704643418
PF3D7_0216700.1	1.77432826870912	1.81221954115909	2.74886501000103	0.09732349198912	0.568299704643418
PF3D7_0216700.2	1.77432826870912	1.81221954115909	2.74886501000103	0.09732349198912	0.568299704643418
PF3D7_1244100	-0.975725910339488	3.01467839755156	2.74514306908799	0.0975503455894497	0.568299704643418
PF3D7_1033900	1.57242080641309	1.16443064983035	2.74415212541337	0.0976108410930918	0.568299704643418
PF3D7_1455300	2.15146606102433	0.732925511278723	2.73332663454845	0.098274391224869	0.568299704643418
PF3D7_0416700	1.37757995413575	2.64987827798871	2.73222428527228	0.0983422354166293	0.568299704643418
PF3D7_1246500	2.15090013693318	0.846625359848783	2.73003609957067	0.0984770589486382	0.568299704643418
PF3D7_1217400	1.7646037431852	0.32685049624711	2.72473569134995	0.0988044765623325	0.568299704643418
PF3D7_0723600	0.862067376698433	4.98497571012999	2.72309911350427	0.0989058113691522	0.568299704643418
PF3D7_1410300	1.21239764455131	2.3284368795888	2.71466769461214	0.0994296748200875	0.568299704643418
PF3D7_0820900	-1.50061938638393	1.45203360027555	2.71447649711562	0.0994415894274866	0.568299704643418
PF3D7_0303400	3.79414733823359	0.0779363844253153	2.71398088647968	0.0994724810127686	0.568299704643418
PF3D7_0310500	-0.949372602190456	3.53970677820881	2.71270678660287	0.099551944205738	0.568299704643418
PF3D7_0909700	-0.892190560983748	3.38137770194076	2.71207742327355	0.0995912219742716	0.568299704643418
PF3D7_1435400	-1.03932681333837	2.73232007811239	2.71062834142734	0.0996817216831096	0.568299704643418
PF3D7_0909800	0.842583631467543	5.72370207564333	2.7088392396772	0.0997935805994291	0.568299704643418
PF3D7_0207700	1.45615499022783	0.911048636439291	2.70847515370768	0.0998163609052926	0.568299704643418
PF3D7_0215400	1.11543793328976	2.9502663889184	2.70760387791692	0.0998708983658891	0.568299704643418
PF3D7_0532300	0.816335590567908	6.99967414220365	2.70666201375277	0.0999298909072229	0.568299704643418
PF3D7_1114800	3.78907999505567	-0.450894240150444	2.7064631220198	0.0999423531201821	0.568299704643418
PF3D7_0609800	1.56132500759039	0.769813609498688	2.70553717358456	0.100000393801547	0.568299704643418
PF3D7_1250000	0.933650566273524	3.92361836887646	2.70511996841337	0.100026557257254	0.568299704643418
PF3D7_1142200	1.75670882775096	0.304864142564955	2.70218837346621	0.100210612206635	0.568299704643418
PF3D7_0705600	-1.1187690737975	2.0843790260516	2.70162452322536	0.100246054935688	0.568299704643418
PF3D7_1347500	0.818808028453702	7.74422069028704	2.70099903439931	0.100285388189041	0.568299704643418
PF3D7_0716400	1.11948026966057	2.75812346673804	2.70037866770038	0.10032441599509	0.568299704643418
PF3D7_0218000	3.78402285345787	2.15777514002042	2.6989797990206	0.100412480936713	0.568299704643418
PF3D7_0222100	3.78402285345787	0.236906674978962	2.6989797990206	0.100412480936713	0.568299704643418
PF3D7_1362800	3.78402285345787	0.231493657930408	2.6989797990206	0.100412480936713	0.568299704643418
PF3D7_1146200	-1.62431681911264	0.960524902817914	2.69737489005402	0.100513621060936	0.568299704643418
PF3D7_0505900	0.837718820070692	6.72108551015589	2.69700369218196	0.100537029508843	0.568299704643418
PF3D7_1205100	1.48169359457216	1.68891194191054	2.69474545939273	0.100679566391696	0.568299704643418
PF3D7_1472400	-1.33504967370838	1.65455402535685	2.68895981459322	0.101045757796197	0.568299704643418
PF3D7_1037400	-1.36983070738762	0.789154494440747	2.67875377478931	0.10169528384768	0.568299704643418
PF3D7_0528800	-0.949836825091274	2.6680597304969	2.67870337865018	0.101698502428782	0.568299704643418
PF3D7_1127900	-1.18209729106683	1.74538806952746	2.67366748618812	0.102020685248227	0.568299704643418
PF3D7_1424800	-1.04268876884871	1.96383489773872	2.67249879185314	0.102095614631213	0.568299704643418
PF3D7_1365900	0.8068346308654	9.35143108766507	2.67099915373161	0.102191850244043	0.568299704643418
PF3D7_0918000	-1.42129404357178	2.98413559461051	2.67040307385217	0.102230129766375	0.568299704643418
PF3D7_0926700	-1.18535777664135	2.95473187678294	2.6695235387607	0.102286641083951	0.568299704643418
PF3D7_0719300	0.957177053108861	3.53016577014783	2.66866532600058	0.102341815351813	0.568299704643418
PF3D7_1474200	-1.73853892758841	1.91970605449293	2.66820380343673	0.1023714999739	0.568299704643418
PF3D7_1347600	1.36166298743768	1.09823861194285	2.66711270477179	0.10244171569752	0.568299704643418
PF3D7_1428100	-1.23019060794066	1.14631773192454	2.66142670628619	0.102808481820431	0.568299704643418
PF3D7_0628300	0.8860361652083	6.15296269278632	2.64558606802013	0.103837856680235	0.568299704643418
PF3D7_0304500	-1.41308233467697	3.07294312362502	2.64032242649261	0.104182398227095	0.568299704643418
PF3D7_0935400	3.74097657043755	0.661751822665886	2.6381743517202	0.104323364061937	0.568299704643418
PF3D7_0901900	3.74097657043755	0.133887887935521	2.6381743517202	0.104323364061938	0.568299704643418
PF3D7_1014000	3.74097657043755	0.0586223491030395	2.6381743517202	0.104323364061938	0.568299704643418
PF3D7_1107100	3.74097657043755	0.84637456797239	2.6381743517202	0.104323364061938	0.568299704643418
PF3D7_1118800	3.74097657043755	-0.242723342241291	2.6381743517202	0.104323364061938	0.568299704643418
PF3D7_1214200	3.74097657043755	0.810981369381661	2.6381743517202	0.104323364061938	0.568299704643418
PF3D7_1357400	3.74097657043755	1.80899334333834	2.6381743517202	0.104323364061938	0.568299704643418
PF3D7_1415100	3.74097657043755	0.257560429612259	2.6381743517202	0.104323364061938	0.568299704643418
PF3D7_1325500	3.74097657043755	1.86383931137224	2.6381743517202	0.104323364061938	0.568299704643418
PF3D7_1468300	-1.90532702169266	0.378594434431041	2.63441848390118	0.104570342415999	0.568299704643418
PF3D7_0111300	3.73603647141346	1.82422393811668	2.63102145266974	0.104794276143348	0.568299704643418
PF3D7_0310900	3.73603647141346	1.161362183811	2.63102145266974	0.104794276143348	0.568299704643418
PF3D7_0420600	3.73603647141346	0.509463983593376	2.63102145266974	0.104794276143348	0.568299704643418
PF3D7_0506600	3.73603647141346	-0.579286592162618	2.63102145266974	0.104794276143348	0.568299704643418
PF3D7_0526600	3.73603647141346	3.10018578154813	2.63102145266974	0.104794276143348	0.568299704643418
PF3D7_1125100	3.73603647141346	1.00853289646992	2.63102145266974	0.104794276143348	0.568299704643418
PF3D7_1431600	3.73603647141346	1.02974731281837	2.63102145266974	0.104794276143348	0.568299704643418
PF3D7_1112800	3.73603647141346	-0.171591729118402	2.63102145266974	0.104794276143348	0.568299704643418
PF3D7_1476000	-0.871933842659186	3.38572933062842	2.63101802188144	0.104794502567764	0.568299704643418
PF3D7_0726800	3.73110638962965	0.466488665800295	2.62390090849275	0.105265372401239	0.568299704643418
PF3D7_1339500	3.73110638962965	0.751536195453208	2.62390090849275	0.105265372401239	0.568299704643418
PF3D7_1243200	3.73110638962965	-0.519270593816643	2.62390090849274	0.10526537240124	0.568299704643418
PF3D7_0602000	3.73110638962965	0.850056941590999	2.62390090849274	0.10526537240124	0.568299704643418
PF3D7_1003000	3.73110638962965	-0.234177268938687	2.62390090849274	0.10526537240124	0.568299704643418
PF3D7_1027600	3.73110638962965	0.295032545489465	2.62390090849274	0.10526537240124	0.568299704643418
PF3D7_1120600	3.73110638962965	2.06395285774303	2.62390090849274	0.10526537240124	0.568299704643418
PF3D7_1206900	3.73110638962965	-0.0197548708808227	2.62390090849274	0.10526537240124	0.568299704643418
PF3D7_0606400	3.73110638962965	-0.388886218837386	2.62390090849274	0.105265372401241	0.568299704643418
PF3D7_1008200	3.73110638962965	0.0125202833165745	2.62390090849274	0.105265372401241	0.568299704643418
PF3D7_0213500	-0.980911372330324	2.9195578576423	2.61839346408336	0.105631337698988	0.568299704643418
PF3D7_1320300	3.72618632221223	0.345269089933059	2.61681254838049	0.105736645766418	0.568299704643418
PF3D7_0306600	3.72618632221223	1.50055183805422	2.61681254838049	0.105736645766419	0.568299704643418
PF3D7_0512400	3.72618632221223	-0.345826953987083	2.61681254838049	0.105736645766419	0.568299704643418
PF3D7_0304700	3.72618632221223	-0.380001386232271	2.61681254838049	0.105736645766419	0.568299704643418
PF3D7_0314900	3.72618632221223	0.408039314554676	2.61681254838049	0.105736645766419	0.568299704643418
PF3D7_0411700	3.72618632221223	-0.700294967139391	2.61681254838049	0.105736645766419	0.568299704643418
PF3D7_0417000	3.72618632221223	-0.588628727134997	2.61681254838049	0.105736645766419	0.568299704643418
PF3D7_0512500	3.72618632221223	0.180030943589434	2.61681254838049	0.105736645766419	0.568299704643418
PF3D7_0530400	3.72618632221223	0.02465543632414	2.61681254838049	0.105736645766419	0.568299704643418
PF3D7_0613200	3.72618632221223	1.80776981540595	2.61681254838049	0.105736645766419	0.568299704643418
PF3D7_0720300	3.72618632221223	-0.594779148455964	2.61681254838049	0.105736645766419	0.568299704643418
PF3D7_0818100	3.72618632221223	-0.114829475595051	2.61681254838049	0.105736645766419	0.568299704643418
PF3D7_1133500	3.72618632221223	-0.0877875472538808	2.61681254838049	0.105736645766419	0.568299704643418
PF3D7_1134900	3.72618632221223	-0.109964035605815	2.61681254838049	0.105736645766419	0.568299704643418
PF3D7_1345900	3.72618632221223	3.57801469190419	2.61681254838049	0.105736645766419	0.568299704643418
PF3D7_1462100	3.72618632221223	0.905135248415389	2.61681254838049	0.105736645766419	0.568299704643418
PF3D7_1474100	3.72618632221223	3.38283317596031	2.61681254838049	0.105736645766419	0.568299704643418
PF3D7_1103000	-1.89894933557699	-0.0538141235309091	2.61676930909342	0.105739527641471	0.568299704643418
PF3D7_0200100	1.19452847480923	2.39118750411054	2.60596041256311	0.106462643920505	0.571642724336693
PF3D7_0312900	1.26802965604189	1.31992183100273	2.60195632064046	0.106731893399917	0.572122167228836
PF3D7_0703900	-0.89167670132684	3.74659445515842	2.60162340984684	0.106754313128126	0.572122167228836
PF3D7_1467400	1.74105758001536	1.51159787162467	2.59563170001748	0.107158706822243	0.572437718269776
PF3D7_1030500	-1.15754643039717	2.15842911254007	2.59507144261018	0.107196605682094	0.572437718269776
PF3D7_1141800	-1.55027459148452	0.0997545091979333	2.59461435638246	0.107227536378114	0.572437718269776
PF3D7_0811200	-0.900255882569685	3.13608103790146	2.59433159267186	0.107246675698612	0.572437718269776
PF3D7_1339300	0.825267115134598	5.56734831373043	2.58919761143217	0.107594830427252	0.572437718269776
PF3D7_1238900	-0.920819978040907	2.09339750794951	2.58877897058234	0.107623274708459	0.572437718269776
PF3D7_1127800	-1.02267561415207	2.45989360927347	2.58751084840199	0.107709486835472	0.572437718269776
PF3D7_1230400	1.73775292706325	5.11242834120091	2.58521797028684	0.107865558597851	0.572437718269776
PF3D7_0506800	0.952511005984969	3.09363453435995	2.58442006076835	0.107919928973126	0.572437718269776
PF3D7_0923800.1	-1.46285831035579	3.41231241741106	2.58431801011444	0.107926884979763	0.572437718269776
PF3D7_0923800.2	-1.46285831035579	3.41231241741106	2.58431801011444	0.107926884979763	0.572437718269776
PF3D7_1130400	0.824281038482571	5.55118866370884	2.58060199387268	0.108180512830877	0.5724598336413
PF3D7_0628600	0.930806054824403	3.77226658152926	2.57834110277435	0.108335144790773	0.5724598336413
PF3D7_1304600	-1.5458221586179	1.48189743037696	2.57712828073136	0.108418194875119	0.5724598336413
PF3D7_1437700	-1.5458221586179	0.627009746020942	2.57712828073136	0.108418194875119	0.5724598336413
PF3D7_0532500	-1.01581583417707	2.72345750167243	2.57684945530744	0.108437297812139	0.5724598336413
PF3D7_0506400	2.09024970169882	-0.142844446131065	2.57336585153245	0.108676279004583	0.572921325589849
PF3D7_1123200	-1.88209438392029	0.343482195083303	2.57151276116509	0.108803639879162	0.572921325589849
PF3D7_0417400	-0.834281473338325	4.6980737308475	2.57114833191613	0.108828705992837	0.572921325589849
PF3D7_0831700	0.790942275626376	9.4038897919032	2.56683394320839	0.109125940265138	0.573951689543338
PF3D7_0831800	-0.791586224753253	8.35774346838232	2.55907261866326	0.109662895327355	0.576239786413445
PF3D7_0817900	0.805332867327446	7.18243548674117	2.55172162396711	0.110174141521799	0.578388668676186
PF3D7_1301800	1.70666149034667	0.769513102339498	2.54730056639963	0.110482878522758	0.578579891596938
PF3D7_1346100	0.800073458553293	6.68529768959951	2.54573816901907	0.110592213330673	0.578579891596938
PF3D7_1144100	1.10062171226957	4.42666859131867	2.54483361817279	0.110655567173658	0.578579891596938
PF3D7_1238000	-1.87152926673346	-0.435546539494979	2.54368554380725	0.110736034661242	0.578579891596938
PF3D7_1440300	-1.87152926673346	1.80182202810431	2.54368554380725	0.110736034661242	0.578579891596938
PF3D7_1102700	0.788859284614813	7.98647420245578	2.54101522210609	0.110923444182109	0.578579891596938
PF3D7_1455900	-1.29499968289257	1.23470351678928	2.54096625505132	0.110926884062802	0.578579891596938
PF3D7_0908900	1.53936429387596	1.61622844619116	2.53850764388602	0.111099749726115	0.578947451568159
PF3D7_0601800	-1.13794767759747	5.27218367111337	2.53661992567981	0.111232676911234	0.579106404471561
PF3D7_1219100	-0.940974891147985	3.1392405600981	2.51986607465802	0.112420131982931	0.584750162126489
PF3D7_0934600	2.06358675094768	0.153278251652959	2.50655933556621	0.113373217123002	0.589165597071191
PF3D7_1354600	1.09756418416878	2.04209040791223	2.50079583792277	0.113788783734441	0.590782170095989
PF3D7_1147500	-1.15174919998291	1.18240897235211	2.49922390223346	0.11390241654757	0.590829599229323
PF3D7_0511800	0.80240878599999	5.54391025312337	2.49639692240548	0.11410708951331	0.591348748036898
PF3D7_1219600	0.851594665817047	4.73903185195615	2.49005531548366	0.114567697849832	0.592879809431382
PF3D7_1436700	2.05617709628855	0.221128318365267	2.48741681993515	0.114759942787389	0.592879809431382
PF3D7_1127600	0.950290257356665	4.80834719006214	2.4867404282956	0.114809283030245	0.592879809431382
PF3D7_0918300	0.806807607403008	6.10717062679856	2.48656662355758	0.11482196521531	0.592879809431382
PF3D7_1214600	0.924598456782972	3.62403598350063	2.48196262625859	0.115158473072421	0.594074823678345
PF3D7_1433200	-1.39855153374825	0.627976341193815	2.47886715855382	0.115385333646743	0.594702530937724
PF3D7_1359200	0.938474905450426	3.46953133817055	2.47210292217231	0.115882789353836	0.59568277711566
PF3D7_0525000	1.0846246573535	4.05880558107965	2.47066374632923	0.115988934421647	0.59568277711566
PF3D7_0801800	0.897047121625699	4.47174122258822	2.47029450348017	0.116016184881817	0.59568277711566
PF3D7_0617300	2.04876693509676	1.60585482188161	2.4695931971452	0.116067961395014	0.59568277711566
PF3D7_0917000	-1.66827311294007	2.0142846187165	2.46910930145781	0.116103701644035	0.59568277711566
PF3D7_1470100	-1.12469741163649	2.3353759227441	2.46770273459389	0.116207658853656	0.59568277711566
PF3D7_1012300	1.68034385763285	2.82608162341052	2.45273609526762	0.117320209830456	0.600841002157061
PF3D7_1224900	0.886942530629088	3.56812087901835	2.43591243178664	0.118584876085036	0.606252915473493
PF3D7_0317800	-1.03539615407993	1.76435976521544	2.43582627973394	0.118591390964571	0.606252915473493
PF3D7_0906100	-1.16957516254856	4.76284973701143	2.43055816372405	0.118990522920972	0.607743827095915
PF3D7_1443300	0.856344405733187	4.82736736565433	2.42384188578249	0.119501529662623	0.609802932050967
PF3D7_1366500	1.7039163644471	4.66142430414511	2.4224234090282	0.119609764519405	0.609804876999742
PF3D7_0711100	-0.859466889499634	3.31566147678456	2.41189804394397	0.120416285854605	0.612928627150155
PF3D7_1404500	0.970431891191543	2.5783170384133	2.41077053442842	0.120503039352839	0.612928627150155
PF3D7_1449200	0.938375417335852	2.22631073349904	2.4101905870203	0.120547688961969	0.612928627150155
PF3D7_0606000	0.865438645934004	3.05590893384958	2.40229714493617	0.121157223218358	0.615474339691463
PF3D7_1441200	0.792780154338067	5.93266344900917	2.39627801768148	0.121624317064216	0.61729253921102
PF3D7_0606500	0.860643829571934	3.60864868479849	2.39190017635575	0.121965298150891	0.61846797824676
PF3D7_1234800	0.821338288716885	5.02335310885406	2.37640601364231	0.123180648282058	0.623482691094875
PF3D7_1231900	-1.63608267783063	1.08951572184635	2.37608325460919	0.123206107668432	0.623482691094875
PF3D7_1224400	-0.988851501762071	1.84345035070951	2.36994237544867	0.123691617238925	0.623482691094875
PF3D7_1452000	1.35325978961743	1.3068045092539	2.36861075596746	0.123797177505016	0.623482691094875
PF3D7_1411300	-0.947864012010261	2.21994548518103	2.36398584638751	0.124164581309635	0.623482691094875
PF3D7_1251100	0.779472309732933	6.00945213442475	2.35769789757118	0.124666040669525	0.623482691094875
PF3D7_1211200	-0.895255339958665	2.96835583757673	2.35581670564761	0.124816501146186	0.623482691094875
PF3D7_1243600	0.765072535068731	7.21094489500247	2.35509804725313	0.124874033730006	0.623482691094875
PF3D7_1316900	-0.860364486474902	3.64727896724009	2.35246065344731	0.125085424274286	0.623482691094875
PF3D7_0419600	0.768658393868195	6.85532924844887	2.3498363223785	0.125296162503335	0.623482691094875
PF3D7_1127300	-1.22326405198033	1.21010659216737	2.34770348780702	0.125467723336018	0.623482691094875
PF3D7_0216300	-1.26000054525726	2.08185112800417	2.34366405667441	0.125793362746761	0.623482691094875
PF3D7_1311700	0.884502761425825	3.55728978295255	2.3436332799544	0.125795847420119	0.623482691094875
PF3D7_1456800	0.759360644631207	8.13596111476276	2.34066017863836	0.12603612990874	0.623482691094875
PF3D7_1215300	-0.806880843599492	6.71862082572738	2.33645466188616	0.126376886538996	0.623482691094875
PF3D7_1438000	-0.826689822659165	4.04053699027818	2.3340415923329	0.126572870605765	0.623482691094875
PF3D7_0502900	0.870747874011631	5.65236396049937	2.33387265126867	0.126586604272539	0.623482691094875
PF3D7_1217200	0.94663791065283	2.83893949237325	2.32886771800296	0.126994221384621	0.623482691094875
PF3D7_1105500	1.66963518597359	2.39453526356316	2.32477589125312	0.127328557266094	0.623482691094875
PF3D7_1434700	-0.813101652303039	4.57874114281886	2.32138662437962	0.127606229895058	0.623482691094875
PF3D7_1124700	0.82013938680334	4.77776431650606	2.31814241023659	0.12787265017424	0.623482691094875
PF3D7_0214200	1.64706440171146	3.52160106635647	2.31723014164477	0.127947678679277	0.623482691094875
PF3D7_0820700	1.46879750958267	2.29884736540494	2.31610262339197	0.128040477872263	0.623482691094875
PF3D7_0826700	0.75014868771912	9.94519342567635	2.31572139178449	0.128071871683148	0.623482691094875
PF3D7_0905700.1	0.818469955445151	4.77069229705138	2.31271690531659	0.128319586436329	0.623482691094875
PF3D7_0905700.2	0.818469955445151	4.77069229705138	2.31271690531659	0.128319586436329	0.623482691094875
PF3D7_0905700.3	0.818469955445151	4.77069229705138	2.31271690531659	0.128319586436329	0.623482691094875
PF3D7_1474800	0.766320759559323	6.6108559016215	2.31016185498605	0.128530665742955	0.623482691094875
PF3D7_1248600	-1.07788789064889	1.7529985781178	2.30991680788025	0.128550930028173	0.623482691094875
PF3D7_1472900	0.844182275666551	3.82197948590489	2.30753262515563	0.128748276963566	0.623482691094875
PF3D7_1469100	-0.999934922317435	1.74998932519527	2.30642530941795	0.128840047995755	0.623482691094875
PF3D7_0614600	-1.17604348589167	0.46682666715571	2.29491657430827	0.129798184791265	0.623482691094875
PF3D7_0926000	1.6403687187652	1.74781310801225	2.29366963516243	0.129902472103488	0.623482691094875
PF3D7_0305000	-1.05426947121435	2.40994079931183	2.29357902655995	0.129910053760951	0.623482691094875
PF3D7_1126900	0.767002628489977	5.87290377596248	2.29192263366014	0.130048739086314	0.623482691094875
PF3D7_0211900	-1.60529405143989	1.10092984472833	2.28955832636593	0.130246982208803	0.623482691094875
PF3D7_1220400	-1.24701632901469	1.05731460493629	2.28874383945318	0.130315353552221	0.623482691094875
PF3D7_1242900	1.2636852152585	3.8804435650278	2.28309749208162	0.130790432810289	0.623482691094875
PF3D7_1009300	1.47112757982752	0.956748395342974	2.28223188836011	0.130863434647353	0.623482691094875
PF3D7_0525300	-2.19333934914543	-0.361698807418135	2.28169095462794	0.130909078086258	0.623482691094875
PF3D7_0701400	-2.19333934914543	-0.309954857402695	2.28169095462794	0.130909078086259	0.623482691094875
PF3D7_1133900	0.903832277315504	2.99211680878472	2.27990274337685	0.131060091970865	0.623482691094875
PF3D7_0103200	-0.801695612339652	5.13068347579704	2.27895886255817	0.131139880768401	0.623482691094875
PF3D7_1337900	-0.993254779227743	2.32447627695386	2.26735593424839	0.1321251491858	0.623482691094875
PF3D7_1022200	-1.28276342074054	0.606478661419446	2.26684449026234	0.132168768439432	0.623482691094875
PF3D7_0615900	-0.926009992500878	2.99480307392723	2.26271295419258	0.132521722730379	0.623482691094875
PF3D7_0416100	-1.39671001543337	2.2029489208855	2.26226236821055	0.132560279592423	0.623482691094875
PF3D7_1119800	-0.993830593682154	2.37707273781643	2.26126666081866	0.13264552719833	0.623482691094875
PF3D7_1203700	0.747364911396821	7.78868398379314	2.25890308431848	0.132848130362196	0.623482691094875
PF3D7_1408900	-0.903072802817676	2.99268712200081	2.25886308689327	0.132851561870028	0.623482691094875
PF3D7_0629900	0.771359082416994	5.16441437737965	2.25224320664847	0.133420869513705	0.623482691094875
PF3D7_0936300	0.744310042326612	7.42976102131139	2.24966439875516	0.133643383560708	0.623482691094875
PF3D7_1467000	1.43533449287149	0.530327435789706	2.24257188038639	0.134257508092622	0.623482691094875
PF3D7_0905500	-2.17299777556118	-0.496814019982891	2.24144068978153	0.134355746650341	0.623482691094875
PF3D7_1412900.1	0.790049233200846	4.85738559353383	2.23830490441846	0.134628495312851	0.623482691094875
PF3D7_1412900.2	0.790049233200846	4.85738559353383	2.23830490441846	0.134628495312851	0.623482691094875
PF3D7_0707300	0.966462632301266	1.83490009026554	2.23823173676579	0.134634866778178	0.623482691094875
PF3D7_1462500	1.24371707077793	0.927151985989358	2.23273272756453	0.13511468909499	0.623482691094875
PF3D7_1310700	1.44198404378774	0.75719675335749	2.23225784034257	0.135156215571767	0.623482691094875
PF3D7_1367000	0.791222161675182	5.48101496540802	2.23079440920065	0.135284275028111	0.623482691094875
PF3D7_1477700	-2.16730640188809	-0.336201367118191	2.23041321150154	0.135317654514901	0.623482691094875
PF3D7_0321100	-1.38828620873565	0.342605709297777	2.22982346357394	0.135369313812254	0.623482691094875
PF3D7_1423600	1.0056144107984	3.17905868414513	2.22773217851457	0.135552679050409	0.623482691094875
PF3D7_1035300	1.26481219765387	-0.0117999221560467	2.22379323459282	0.1358988035796	0.623482691094875
PF3D7_0402100	0.779327922252492	4.44829170105616	2.21982462467893	0.136248535783366	0.623482691094875
PF3D7_0202500	0.732888257114854	10.1694702480725	2.2134849144832	0.136809313090946	0.623482691094875
PF3D7_1235600	1.13330178570772	4.25036878731024	2.21282156664769	0.136868138577	0.623482691094875
PF3D7_0722400	0.770533213623355	5.36496015030761	2.21234565937765	0.136910359345582	0.623482691094875
PF3D7_0827900	0.738018013798807	7.36942109451591	2.21089212361879	0.137039402129715	0.623482691094875
PF3D7_0715800	1.60771464148494	2.74098348901046	2.20847297793826	0.137254472579041	0.623482691094875
PF3D7_0610400	0.736332387462018	11.6111152736029	2.20712217192032	0.137374728452045	0.623482691094875
PF3D7_1252100	-1.26543672419565	0.576392196486286	2.20637588107852	0.13744121782694	0.623482691094875
PF3D7_0220600	0.792393611029976	3.98163785088041	2.2059281257862	0.137481127048722	0.623482691094875
PF3D7_1331800	0.739732773265928	7.38218589046229	2.20268283469771	0.137770774092207	0.623482691094875
PF3D7_1310500	-0.89570491748286	2.50394383370303	2.20109360132614	0.137912864966168	0.623482691094875
PF3D7_1252800	-0.844149440717866	3.66143885649241	2.20074322774139	0.137944213417476	0.623482691094875
PF3D7_0902800	1.60483821420137	2.36872350678636	2.19879181821821	0.138118955170459	0.623482691094875
PF3D7_0220000	0.741354594360366	7.50315944429763	2.19598654302353	0.138370592541158	0.623482691094875
PF3D7_0306300	0.769001942886046	6.43264758078572	2.19486289437085	0.138471529663813	0.623482691094875
PF3D7_1449300	0.80043817810642	3.5807480455332	2.19447272067397	0.138506598196943	0.623482691094875
PF3D7_1140600	-2.14572432943023	-0.263292021037783	2.19150670411293	0.138773507539599	0.623482691094875
PF3D7_0826400	1.60124431722209	1.79920112351208	2.18997259919749	0.138911786688828	0.623482691094875
PF3D7_1443400	-1.37196420519019	1.64018521891322	2.18310963173597	0.13953228749887	0.623482691094875
PF3D7_0520000	0.730097935614584	8.85361103688393	2.18046685980201	0.139772057163337	0.623482691094875
PF3D7_0303100	1.61734995827991	1.22405435369284	2.17854836770866	0.139946405119953	0.623482691094875
PF3D7_0826600	-1.45314896371623	1.27020025506966	2.17815036336443	0.139982605369033	0.623482691094875
PF3D7_1470300	-1.04881400746509	1.53008701135674	2.17744264601349	0.140047001350136	0.623482691094875
PF3D7_1211000	1.96061600568208	0.468619781082689	2.17607634846146	0.140171416376111	0.623482691094875
PF3D7_1029900	1.58286334319344	0.148113730646938	2.17197814259469	0.140545343975404	0.623482691094875
PF3D7_1006100	1.95660485224069	0.79329523290841	2.16665271465947	0.14103292039476	0.623482691094875
PF3D7_0701900	0.90586916967541	2.45386532483097	2.16403756539688	0.141273049243798	0.623482691094875
PF3D7_1419100	0.977443485944709	2.14645850684621	2.15998628381003	0.141645954684461	0.623482691094875
PF3D7_1344600	-2.1303963304649	0.18822607089967	2.15792011027208	0.141836564195248	0.623482691094875
PF3D7_1211400	0.730653679762778	7.23821957850721	2.15697280561817	0.141924051731823	0.623482691094875
PF3D7_1229700	-2.12584232722479	1.05800501500555	2.15302376127407	0.142289416664676	0.623482691094875
PF3D7_0910500	-0.961530166948022	2.03753888184037	2.15173996584585	0.142408420912772	0.623482691094875
PF3D7_1420700	0.725492186749493	8.20673888356667	2.14971572695895	0.142596289656098	0.623482691094875
PF3D7_1206300	-1.1721009407299	1.03187449230407	2.1471224227605	0.142837380564404	0.623482691094875
PF3D7_0720000	0.784616447499255	3.93782647769249	2.1410968769121	0.143399328260931	0.623482691094875
PF3D7_0809900	0.901551857957728	3.33247229745483	2.13835893091917	0.14365549323352	0.623482691094875
PF3D7_1432100	0.785015361821434	4.89184693427852	2.13772181492939	0.14371517629005	0.623482691094875
PF3D7_1244800	0.749686316570875	5.72213465840411	2.13746380861568	0.143739353463649	0.623482691094875
PF3D7_1133200	-1.55074290989631	2.51727773082259	2.13437805436878	0.144028867477111	0.623482691094875
PF3D7_1035400	1.13535699463906	1.41072077468972	2.13243352708162	0.144211645609766	0.623482691094875
PF3D7_0723900	-0.845114757978616	3.12772268422767	2.12389523937187	0.145017309871851	0.623482691094875
PF3D7_1248500	0.726426524043571	7.53562390245153	2.12381734697745	0.14502468302105	0.623482691094875
PF3D7_1478800	-1.28871751646464	-0.0473381923313049	2.12189130384226	0.14520713310294	0.623482691094875
PF3D7_0628100	-0.949607880593532	1.46646662228886	2.11912731711956	0.145469411952791	0.623482691094875
PF3D7_1424100	0.717867179853584	9.09414591410108	2.11853126023943	0.145526042643345	0.623482691094875
PF3D7_0412400	-0.78934933210103	4.5084804343154	2.11812499774959	0.145564655423146	0.623482691094875
PF3D7_0706100	0.972396083852675	2.28187267909116	2.11797865304342	0.14557856742676	0.623482691094875
PF3D7_0105000	-0.817563298628005	2.55092365402467	2.11150145961724	0.146195814393671	0.623482691094875
PF3D7_1252500	-2.10042842627988	-0.416108227004762	2.10453278288514	0.146863195322739	0.623482691094875
PF3D7_0609300	-2.10042842627988	0.673043539729415	2.10453278288514	0.14686319532274	0.623482691094875
PF3D7_1324900	0.716859000129435	9.43776588611659	2.10422301146605	0.14689294139935	0.623482691094875
PF3D7_1410600	0.725249316695097	6.92008634276523	2.09685768710214	0.147602209673115	0.623482691094875
PF3D7_0522700	-2.09367225983653	1.29286117120318	2.0947679128632	0.147804154753573	0.623482691094875
PF3D7_1137500	-2.09367225983653	3.09849532258668	2.09476791286321	0.147804154753573	0.623482691094875
PF3D7_1327100	-2.09367225983653	-0.209461638744486	2.09476791286321	0.147804154753573	0.623482691094875
PF3D7_1006700	0.867765548349453	3.46859729248017	2.09461360418223	0.147819078716029	0.623482691094875
PF3D7_0624200	-1.25934841840921	2.39949494888932	2.08974485046562	0.148290835078304	0.623482691094875
PF3D7_1144400	1.92359875530508	0.553312412833686	2.08922259437585	0.148341539806662	0.623482691094875
PF3D7_1420600	-0.999338678373634	2.75730075601275	2.08597737599706	0.148657050366489	0.623482691094875
PF3D7_0528700	0.749328236993018	5.16384057548678	2.08550319831128	0.148703214885782	0.623482691094875
PF3D7_0102700	1.39189191680312	0.911396428677124	2.08126964436076	0.149116099644443	0.623482691094875
PF3D7_0511100	1.55994179218308	0.223384177057072	2.07636832380807	0.149595728515541	0.623482691094875
PF3D7_1118000	0.875537304741859	3.28663285506824	2.07448495797717	0.149780492761086	0.623482691094875
PF3D7_1414200	-0.809089668130701	2.97890057537546	2.07214745647462	0.150010168099536	0.623482691094875
PF3D7_0717300	0.74733268028453	4.5246742020875	2.0717576667855	0.150048506300397	0.623482691094875
PF3D7_0905400	1.02465884674062	1.40390701404315	2.0698433465891	0.150236952309046	0.623482691094875
PF3D7_0615300	-2.07992755246222	0.858194691212931	2.06865847454868	0.150353725414701	0.623482691094875
PF3D7_1242100	-2.07992755246222	-0.368685554660841	2.06865847454868	0.150353725414701	0.623482691094875
PF3D7_1220500	-1.14631908720216	0.717253685965722	2.06417582995858	0.150796434906187	0.623482691094875
PF3D7_0905200	0.825211307837105	3.65866502747556	2.06408581081237	0.150805340359548	0.623482691094875
PF3D7_0516400	-1.10322218905784	1.59846695985942	2.06190067796496	0.151021694781061	0.623482691094875
PF3D7_1473300	-1.76959475764314	-0.331974551836688	2.06161717545448	0.151049790669616	0.623482691094875
PF3D7_0719400	-1.76959475764314	1.0957885332746	2.06161717545449	0.151049790669616	0.623482691094875
PF3D7_0317300	0.762471004214963	4.93622167722273	2.06154170647852	0.151057270852192	0.623482691094875
PF3D7_0814500	-0.959987615413973	1.6336916503001	2.06002634095943	0.151207556563182	0.623482691094875
PF3D7_0303600	-2.07423617878913	0.434445155802264	2.05805051814624	0.151403762149596	0.623482691094875
PF3D7_0424400	-2.07423617878913	0.0150779455660933	2.05805051814624	0.151403762149596	0.623482691094875
PF3D7_1028200	-1.41247036478231	2.41003222977336	2.05718575731865	0.151489726342898	0.623482691094875
PF3D7_1105700	0.827910817709414	3.5010004471056	2.05693575990043	0.151514588394429	0.623482691094875
PF3D7_1428200	-0.866278841694873	2.57718621447857	2.05343364640794	0.151863356942579	0.623482691094875
PF3D7_1320600	0.734932345551614	5.42937735437739	2.0502570919709	0.152180490073949	0.623482691094875
PF3D7_0417500	1.09460927124557	4.03381623514998	2.0482336182303	0.152382895771716	0.623482691094875
PF3D7_0810800	-0.791286442285394	3.63767715985899	2.04763916630207	0.152442416034673	0.623482691094875
PF3D7_1324800	1.2055644738775	2.73978181579613	2.04618953463563	0.15258767271671	0.623482691094875
PF3D7_0607500	-1.09885984694676	1.19613410288195	2.04503997247189	0.152702973171322	0.623482691094875
PF3D7_1424200	-0.79457955695979	2.7239453303513	2.04342905969447	0.152864712963319	0.623482691094875
PF3D7_1131200	-1.0126665422295	1.3159818724448	2.04225546911254	0.152982666704374	0.623482691094875
PF3D7_1336600	-1.51335397957607	1.78455252446494	2.03464884036674	0.153749689853316	0.623482691094875
PF3D7_0104000	-1.07592059082923	0.311488191778101	2.03289242816429	0.153927418683023	0.623482691094875
PF3D7_0421100	-0.89329382948134	2.47565725253737	2.03254034096028	0.153963073906318	0.623482691094875
PF3D7_1364900	-1.26107241184965	0.796512176350369	2.0324586122514	0.153971351761593	0.623482691094875
PF3D7_1448200	-1.2108611047693	0.269994935313151	2.03132755481199	0.154085962243629	0.623482691094875
PF3D7_0808700	-0.941326075710762	2.74709194738672	2.03034513627807	0.15418558961043	0.623482691094875
PF3D7_1250700	1.89273246892388	2.26535167155841	2.02603842744211	0.154623197402194	0.623482691094875
PF3D7_1309100	0.703103980970132	8.64125762371668	2.02521859150334	0.154706661073494	0.623482691094875
PF3D7_1360200	0.711714420631531	6.67756091255178	2.02174903137395	0.155060447232787	0.623482691094875
PF3D7_0518100	-1.09284272670789	3.0159083489184	2.02119665865829	0.155116856580954	0.623482691094875
PF3D7_0516300	0.82774300070517	3.03826095792031	2.01829334542027	0.155413731657128	0.623482691094875
PF3D7_1329200	1.88882888915291	0.505556429149446	2.01727153782483	0.155518368865852	0.623482691094875
PF3D7_1120400	0.814497807696778	3.12483776092156	2.01690253950323	0.155556175433754	0.623482691094875
PF3D7_0501900	1.55614833393873	0.594930793404616	2.01472788951706	0.155779196259356	0.623482691094875
PF3D7_0403600	-1.74693947346236	1.73232526020302	2.0145591883857	0.155796512542067	0.623482691094875
PF3D7_0913100	-1.74693947346236	1.56309080233478	2.01455918838571	0.155796512542068	0.623482691094875
PF3D7_1226000	-1.74693947346236	0.484242394619356	2.01455918838571	0.155796512542068	0.623482691094875
PF3D7_0725000	0.969246536131044	1.7512987912396	2.01141386580811	0.156119763987887	0.623482691094875
PF3D7_0508300	-0.747970828897145	4.87762345703816	2.00925437153797	0.156342140825888	0.623482691094875
PF3D7_1029300	1.88492824602678	1.66126973264964	2.00853578378321	0.156416218141078	0.623482691094875
PF3D7_0508200	1.88492824602678	0.271571143512053	2.00853578378321	0.156416218141079	0.623482691094875
PF3D7_0529800	-1.56465946308178	1.84549211521183	2.0072029545084	0.156553721589572	0.623482691094875
PF3D7_0409300	1.12821653591247	1.86493719506781	1.99913566409928	0.157388934209612	0.623482691094875
PF3D7_1432200	-2.04152436417525	0.125668223179786	1.99705225834598	0.1576054529214	0.623482691094875
PF3D7_1123700	-2.03583299050215	3.10520297635586	1.98662969768352	0.158693720646956	0.623482691094875
PF3D7_1440000	-2.03583299050215	0.427716910040051	1.98662969768352	0.158693720646956	0.623482691094875
PF3D7_0806200	-2.03583299050215	0.225003846994987	1.98662969768351	0.158693720646956	0.623482691094875
PF3D7_0811500	-0.961320971699674	1.61471891074459	1.98564356441626	0.158797129337265	0.623482691094875
PF3D7_0513400	-1.10182378462017	2.60972996804278	1.98341066017831	0.159031561460512	0.623482691094875
PF3D7_1240300	-0.856743708791903	3.23712082732705	1.9810547558738	0.159279334528639	0.623482691094875
PF3D7_0420700	-0.864801089238599	3.13517893019334	1.98085930685691	0.159299909852273	0.623482691094875
PF3D7_1455400	-0.919531951422909	2.70919263483133	1.97860276923624	0.159537679535645	0.623482691094875
PF3D7_0929400	-0.894805092685037	1.75380748911387	1.9784209449764	0.15955685580737	0.623482691094875
PF3D7_1005100	-0.939434308151478	2.27840413004803	1.973704351542	0.160055214320188	0.623482691094875
PF3D7_0501800	1.53891633578022	2.24108714767241	1.9713240915876	0.160307387232908	0.623482691094875
PF3D7_1135700	0.714963533249774	5.64531515084451	1.97081866437872	0.160360992171099	0.623482691094875
PF3D7_0818800	-0.772297808480308	3.38994307796551	1.97075678995443	0.160367555893344	0.623482691094875
PF3D7_0422800	1.86803478182451	1.75128500770947	1.96749550616439	0.160713950971121	0.623482691094875
PF3D7_1350200	0.780664337369687	4.44574347479422	1.9666608304836	0.160802742478412	0.623482691094875
PF3D7_1031500	0.89093502095193	2.8582028128394	1.96476164896764	0.161004982896093	0.623482691094875
PF3D7_1369400	-0.98134060068558	1.73021946362144	1.96156548850377	0.161345991215666	0.623482691094875
PF3D7_1322300	1.86269029930905	1.63135307748765	1.96012539315321	0.161499908531664	0.623482691094875
PF3D7_0933400	-3.04918150020481	-0.287188819423781	1.95782745768633	0.161745858646835	0.623482691094875
PF3D7_1015000	-3.04918150020481	0.0543820267369379	1.95782745768633	0.161745858646835	0.623482691094875
PF3D7_1131300	-3.04918150020481	-0.413719496880492	1.95782745768633	0.161745858646835	0.623482691094875
PF3D7_1237300	-3.04918150020481	-0.445397621957403	1.95782745768633	0.161745858646835	0.623482691094875
PF3D7_1249200	-3.04918150020481	-0.662188535047013	1.95782745768633	0.161745858646835	0.623482691094875
PF3D7_0832700	-3.04918150020481	-0.698311538875801	1.95782745768633	0.161745858646835	0.623482691094875
PF3D7_1138200	-3.04918150020481	0.755510934070397	1.95782745768632	0.161745858646835	0.623482691094875
PF3D7_0608000	0.755369192582224	4.36567648832841	1.95748477730242	0.161782572628315	0.623482691094875
PF3D7_1131800	-0.908948079790548	3.51022929565811	1.95637168722862	0.161901892114805	0.623482691094875
PF3D7_1355800	0.774749520763269	4.20898409404108	1.95433822536794	0.162120131642195	0.623482691094875
PF3D7_1356900	1.23621037538056	2.78749224561291	1.9479458669484	0.162808375188624	0.623482691094875
PF3D7_1239100	-1.72003519145896	1.12247990511804	1.94605097127957	0.163013032507547	0.623482691094875
PF3D7_1331000	-1.37170465700983	0.36210699465938	1.94169616732777	0.163484485206866	0.623482691094875
PF3D7_1324200	-0.74691405214279	4.11187347517943	1.94060450970766	0.163602912418898	0.623482691094875
PF3D7_1337400	-0.804141371456635	2.72887135177345	1.93749090413465	0.163941226971263	0.623482691094875
PF3D7_0714000	0.693263807426941	7.13614406433485	1.93367044555223	0.164357438501221	0.623482691094875
PF3D7_1125800	1.89035713623784	0.153076581588232	1.93210512876617	0.164528317137238	0.623482691094875
PF3D7_1402900	-1.70907742034231	0.0264383558865351	1.930612447287	0.16469145566043	0.623482691094875
PF3D7_0931500	-1.02405882490753	1.31786260803456	1.92916169129509	0.164850189260182	0.623482691094875
PF3D7_1202900	0.687894909256098	7.39721592293852	1.92452249199548	0.165358959695757	0.623482691094875
PF3D7_0421300	-0.795179395489288	3.13476825917264	1.923512293469	0.16546998379145	0.623482691094875
PF3D7_0110100	1.01373857259458	2.25198115720336	1.92349104253126	0.165472320253875	0.623482691094875
PF3D7_1205800	-0.782054476779548	3.83869424672739	1.92293787483156	0.165533152284201	0.623482691094875
PF3D7_1140800	-0.848806760055327	2.59296977997784	1.92115162214059	0.165729761803631	0.623482691094875
PF3D7_0209600	-3.00011580645254	0.296941201816362	1.91654051733748	0.166238533725547	0.623482691094875
PF3D7_0718800	-3.00011580645254	-0.284108700285237	1.91654051733748	0.166238533725547	0.623482691094875
PF3D7_1351300	-3.00011580645254	-0.698884213449862	1.91654051733748	0.166238533725547	0.623482691094875
PF3D7_1405200	-3.00011580645254	0.172258446605941	1.91654051733748	0.166238533725547	0.623482691094875
PF3D7_1460600	-3.00011580645254	-0.173863293224672	1.91654051733748	0.166238533725547	0.623482691094875
PF3D7_0203500	-3.00011580645254	-0.480673565964599	1.91654051733748	0.166238533725547	0.623482691094875
PF3D7_0612300	-3.00011580645254	-0.498636939736563	1.91654051733748	0.166238533725547	0.623482691094875
PF3D7_1147100	-3.00011580645254	-0.843133072811376	1.91654051733748	0.166238533725547	0.623482691094875
PF3D7_1248300	-3.00011580645254	1.70256992817667	1.91654051733748	0.166238533725547	0.623482691094875
PF3D7_1444000	-3.00011580645254	-0.740894565092228	1.91654051733748	0.166238533725547	0.623482691094875
PF3D7_1448900	-3.00011580645254	1.99860880928649	1.91654051733748	0.166238533725547	0.623482691094875
PF3D7_1475000	-3.00011580645254	-0.732171680860167	1.91654051733748	0.166238533725547	0.623482691094875
PF3D7_0312200	-3.00011580645254	0.0470846742917803	1.91654051733748	0.166238533725547	0.623482691094875
PF3D7_1225900	-3.00011580645254	-0.0662994237980597	1.91654051733748	0.166238533725547	0.623482691094875
PF3D7_1347800	-3.00011580645254	0.0290587094826642	1.91654051733748	0.166238533725547	0.623482691094875
PF3D7_1463600	-1.7007824035162	0.66058543821679	1.91634059974358	0.166260632267801	0.623482691094875
PF3D7_1237800	-1.10194005871118	1.31122690080589	1.9156075063301	0.166341695907493	0.623482691094875
PF3D7_1211900	0.73520395944127	5.52927605546905	1.91559350404624	0.166343244685267	0.623482691094875
PF3D7_1365800	0.918936132110641	2.60826016547021	1.91432995890202	0.166483072040528	0.623482691094875
PF3D7_1409100	-1.12244873586803	1.57993117365109	1.9130382321569	0.166626157134809	0.623482691094875
PF3D7_1337000	-1.13877203875451	1.78748917069541	1.9127225607078	0.166661145589555	0.623482691094875
PF3D7_1117900	-1.11961132567015	1.31851489875862	1.90784904703166	0.167202385853731	0.623482691094875
PF3D7_0111400	3.32675394922648	0.58540003121029	1.90739150137688	0.167253303000566	0.623482691094875
PF3D7_0200300	3.32675394922648	-0.551876771399834	1.90739150137688	0.167253303000566	0.623482691094875
PF3D7_0203900	3.32675394922648	1.8620781382462	1.90739150137688	0.167253303000566	0.623482691094875
PF3D7_0323400	3.32675394922648	-0.331535960177733	1.90739150137688	0.167253303000566	0.623482691094875
PF3D7_0415700	3.32675394922648	-0.480081635469485	1.90739150137688	0.167253303000566	0.623482691094875
PF3D7_0521200	3.32675394922648	-0.166782824066608	1.90739150137688	0.167253303000566	0.623482691094875
PF3D7_0700300	3.32675394922648	-0.496693662134583	1.90739150137688	0.167253303000566	0.623482691094875
PF3D7_0703800	3.32675394922648	-0.330729666055354	1.90739150137688	0.167253303000566	0.623482691094875
PF3D7_0715200	3.32675394922648	1.17398167911258	1.90739150137688	0.167253303000566	0.623482691094875
PF3D7_0831400	3.32675394922648	2.52463799263422	1.90739150137688	0.167253303000566	0.623482691094875
PF3D7_0832000	3.32675394922648	-0.537782444147484	1.90739150137688	0.167253303000566	0.623482691094875
PF3D7_0925300	3.32675394922648	1.61773928294141	1.90739150137688	0.167253303000566	0.623482691094875
PF3D7_1002800	3.32675394922648	0.387164969696722	1.90739150137688	0.167253303000566	0.623482691094875
PF3D7_1034600	3.32675394922648	0.37227434459684	1.90739150137688	0.167253303000566	0.623482691094875
PF3D7_1100300	3.32675394922648	-0.244331861286012	1.90739150137688	0.167253303000566	0.623482691094875
PF3D7_1128700	3.32675394922648	0.655158314889685	1.90739150137688	0.167253303000566	0.623482691094875
PF3D7_1143500	3.32675394922648	-0.193795387133173	1.90739150137688	0.167253303000566	0.623482691094875
PF3D7_1231200	3.32675394922648	-0.428330587408277	1.90739150137688	0.167253303000566	0.623482691094875
PF3D7_1253400	3.32675394922648	1.00702674785852	1.90739150137688	0.167253303000566	0.623482691094875
PF3D7_1301500	3.32675394922648	0.814960427700124	1.90739150137688	0.167253303000566	0.623482691094875
PF3D7_1338600	3.32675394922648	1.78616970709753	1.90739150137688	0.167253303000566	0.623482691094875
PF3D7_1339000	3.32675394922648	-0.810323569555446	1.90739150137688	0.167253303000566	0.623482691094875
PF3D7_1400300	3.32675394922648	-0.232465365350633	1.90739150137688	0.167253303000566	0.623482691094875
PF3D7_1416700	3.32675394922648	-0.109417909661149	1.90739150137688	0.167253303000566	0.623482691094875
PF3D7_1479000	3.32675394922648	0.155964127157053	1.90739150137688	0.167253303000566	0.623482691094875
PF3D7_0212800	3.32675394922648	0.599199210992329	1.90739150137688	0.167253303000567	0.623482691094875
PF3D7_0518800	3.32675394922648	-0.730894878831123	1.90739150137688	0.167253303000567	0.623482691094875
PF3D7_0937400	3.32675394922648	-0.756762459543989	1.90739150137688	0.167253303000567	0.623482691094875
PF3D7_1022800	3.32675394922648	1.91959982342961	1.90739150137688	0.167253303000567	0.623482691094875
PF3D7_1435000	3.32675394922648	1.47152301012525	1.90739150137688	0.167253303000567	0.623482691094875
PF3D7_0100600	3.32675394922648	-0.520917902079874	1.90739150137687	0.167253303000567	0.623482691094875
PF3D7_0832500	3.32675394922648	0.4972840472631	1.90739150137687	0.167253303000567	0.623482691094875
PF3D7_1221000	3.32675394922648	2.58438062448879	1.90739150137687	0.167253303000567	0.623482691094875
PF3D7_0520300	0.776634283400786	3.66302728013137	1.9059953947494	0.16740877601576	0.623482691094875
PF3D7_0518500	0.776804177138637	3.87224659884418	1.90562306910301	0.167450266842643	0.623482691094875
PF3D7_1245400	1.02988692650666	2.22207334221511	1.90494750610397	0.167525579587525	0.623482691094875
PF3D7_0105900	1.15975617191404	0.77011681464015	1.90323497369418	0.167716669106213	0.623482691094875
PF3D7_1243100	0.805154187970514	3.13945816099389	1.90272786255416	0.167773302003709	0.623482691094875
PF3D7_0904700	-2.97787785973481	3.00203109636949	1.89761592084149	0.168345416262218	0.623482691094875
PF3D7_0101500	-2.97787785973481	-0.554843618840809	1.89761592084148	0.168345416262219	0.623482691094875
PF3D7_0305100	-2.97787785973481	2.47607676338344	1.89761592084148	0.168345416262219	0.623482691094875
PF3D7_0420500	-2.97787785973481	-0.724994209246603	1.89761592084148	0.168345416262219	0.623482691094875
PF3D7_0522600	-2.97787785973481	-0.457814372305584	1.89761592084148	0.168345416262219	0.623482691094875
PF3D7_0626400	-2.97787785973481	0.5951559685204	1.89761592084148	0.168345416262219	0.623482691094875
PF3D7_0629400	-2.97787785973481	3.30893169046016	1.89761592084148	0.168345416262219	0.623482691094875
PF3D7_0801600	-2.97787785973481	-0.163492339910679	1.89761592084148	0.168345416262219	0.623482691094875
PF3D7_0815900	-2.97787785973481	-0.0840491055313516	1.89761592084148	0.168345416262219	0.623482691094875
PF3D7_0832300	-2.97787785973481	-0.603977799386033	1.89761592084148	0.168345416262219	0.623482691094875
PF3D7_0927100	-2.97787785973481	1.08736353030611	1.89761592084148	0.168345416262219	0.623482691094875
PF3D7_1005200	-2.97787785973481	-0.727642858627024	1.89761592084148	0.168345416262219	0.623482691094875
PF3D7_1023100	-2.97787785973481	0.128483537116272	1.89761592084148	0.168345416262219	0.623482691094875
PF3D7_1029500	-2.97787785973481	-0.317082729349163	1.89761592084148	0.168345416262219	0.623482691094875
PF3D7_1217000	-2.97787785973481	-0.261856540556851	1.89761592084148	0.168345416262219	0.623482691094875
PF3D7_1327500	-2.97787785973481	-0.139380749768474	1.89761592084148	0.168345416262219	0.623482691094875
PF3D7_1406400	-2.97787785973481	0.484909810537149	1.89761592084148	0.168345416262219	0.623482691094875
PF3D7_1440400	-2.97787785973481	-0.702033263499176	1.89761592084148	0.168345416262219	0.623482691094875
PF3D7_0501700	-2.97787785973481	-0.791273386129473	1.89761592084148	0.168345416262219	0.623482691094875
PF3D7_0908100	-2.97787785973481	-0.541327550701846	1.89761592084148	0.168345416262219	0.623482691094875
PF3D7_0712200	-2.97787785973481	-0.843485963341034	1.89761592084148	0.168345416262219	0.623482691094875
PF3D7_0832100	-2.97787785973481	-0.843485963341034	1.89761592084148	0.168345416262219	0.623482691094875
PF3D7_0114300	-2.97787785973481	-0.737372083669954	1.89761592084148	0.168345416262219	0.623482691094875
PF3D7_0300200	-2.97787785973481	-0.646357302587871	1.89761592084148	0.168345416262219	0.623482691094875
PF3D7_0307400	-2.97787785973481	2.33885835918202	1.89761592084148	0.168345416262219	0.623482691094875
PF3D7_0318800	-2.97787785973481	-0.683062439275458	1.89761592084148	0.168345416262219	0.623482691094875
PF3D7_0524200	-2.97787785973481	-0.569389252779737	1.89761592084148	0.168345416262219	0.623482691094875
PF3D7_0604900	-2.97787785973481	3.58402971009693	1.89761592084148	0.168345416262219	0.623482691094875
PF3D7_0625100	-2.97787785973481	-0.535541177540012	1.89761592084148	0.168345416262219	0.623482691094875
PF3D7_0706800	-2.97787785973481	-0.677129988704013	1.89761592084148	0.168345416262219	0.623482691094875
PF3D7_0806400	-2.97787785973481	-0.599469804026602	1.89761592084148	0.168345416262219	0.623482691094875
PF3D7_0811700	-2.97787785973481	-0.318024527044061	1.89761592084148	0.168345416262219	0.623482691094875
PF3D7_0816700	-2.97787785973481	1.05643733899297	1.89761592084148	0.168345416262219	0.623482691094875
PF3D7_0828700	-2.97787785973481	-0.731632790941992	1.89761592084148	0.168345416262219	0.623482691094875
PF3D7_0928600	-2.97787785973481	0.595425408748299	1.89761592084148	0.168345416262219	0.623482691094875
PF3D7_1128600	-2.97787785973481	-0.686138070955041	1.89761592084148	0.168345416262219	0.623482691094875
PF3D7_1140300	-2.97787785973481	-0.378631256807342	1.89761592084148	0.168345416262219	0.623482691094875
PF3D7_1356000	-2.97787785973481	-0.44263760937907	1.89761592084148	0.168345416262219	0.623482691094875
PF3D7_1359500	-2.97787785973481	-0.367666556327134	1.89761592084148	0.168345416262219	0.623482691094875
PF3D7_1372100	-2.97787785973481	-0.625442037139699	1.89761592084148	0.168345416262219	0.623482691094875
PF3D7_1460900.1	-2.97787785973481	0.960948325736638	1.89761592084148	0.168345416262219	0.623482691094875
PF3D7_1460900.2	-2.97787785973481	0.960948325736638	1.89761592084148	0.168345416262219	0.623482691094875
PF3D7_0602700	-2.97787785973481	0.00923709956971379	1.89761592084148	0.168345416262219	0.623482691094875
PF3D7_0914800	-2.97787785973481	0.158715601458927	1.89761592084148	0.168345416262219	0.623482691094875
PF3D7_1005800	-2.97787785973481	-0.0998685203067009	1.89761592084148	0.168345416262219	0.623482691094875
PF3D7_1012800	-2.97787785973481	-0.0941013171005841	1.89761592084148	0.168345416262219	0.623482691094875
PF3D7_1209700	-2.97787785973481	1.80282639888455	1.89761592084148	0.168345416262219	0.623482691094875
PF3D7_0508900	-1.15031105180187	1.27048385259465	1.89544092099673	0.168589514006603	0.623482691094875
PF3D7_1429700	0.757556847855697	4.05398493878053	1.89443468934364	0.168702579493573	0.623482691094875
PF3D7_1212500	0.809052464320927	3.22926861172665	1.89082107280716	0.169109341857353	0.623482691094875
PF3D7_0514500	-1.02167679094051	0.628208855637663	1.89036172582362	0.169161128218096	0.623482691094875
PF3D7_0418100	0.919576037273454	2.15266469941653	1.88901112666017	0.169313498931402	0.623482691094875
PF3D7_1139000	-1.19286528588764	0.132144369451438	1.88745217447653	0.169489571201113	0.623482691094875
PF3D7_0519800	0.707679246243598	5.02279699790355	1.88463379844915	0.169808419630504	0.623482691094875
PF3D7_0319900	0.784110315320081	3.53962476033155	1.8778085887126	0.170583425082511	0.623482691094875
PF3D7_1406100	-0.982638921607383	1.33549425275721	1.87104614806486	0.171355310962921	0.623482691094875
PF3D7_0630100	-1.38986156817018	0.391460477969825	1.86970844387058	0.171508475526539	0.623482691094875
PF3D7_1307100	-0.735185376868646	3.66366032800518	1.86579663085665	0.171957274007269	0.623482691094875
PF3D7_1234000	1.01591245885762	1.81270060797699	1.8645748561177	0.172097723522803	0.623482691094875
PF3D7_1322400	-1.30617248305971	-0.157138170314788	1.86379360716776	0.172187601366181	0.623482691094875
PF3D7_1366600	-0.783538227450581	3.50940232691603	1.86320810080451	0.172254995612779	0.623482691094875
PF3D7_0619400	0.723450620889707	5.35821595506252	1.86166702784605	0.172432524592622	0.623482691094875
PF3D7_1024800	0.683922028587795	7.07968619286607	1.85860973759966	0.172785342253477	0.623482691094875
PF3D7_1311900	0.69079355571669	6.26632131463667	1.85827728624826	0.172823757852211	0.623482691094875
PF3D7_0515700	0.933185857294029	1.92517384800664	1.85674015432921	0.173001505111885	0.623482691094875
PF3D7_1410100	1.49532095678457	0.0390460494791454	1.85394843235734	0.173324865772739	0.623482691094875
PF3D7_1001600	-1.33976659451883	3.94046431051907	1.85184699505719	0.173568730625892	0.623482691094875
PF3D7_1025700	3.26977859679486	1.54799623377599	1.84994319876203	0.173790000824447	0.623482691094875
PF3D7_0417700	3.26977859679486	-0.516623668643774	1.84994319876203	0.173790000824447	0.623482691094875
PF3D7_1128300	3.26977859679486	0.595532987756443	1.84994319876202	0.173790000824448	0.623482691094875
PF3D7_1454200	-0.791722197365182	3.02421944614097	1.84874273306633	0.173929692776702	0.623482691094875
PF3D7_1455100	-0.821848461375868	2.91070615045289	1.84561896738879	0.174293795319033	0.623482691094875
PF3D7_0221200	3.2643307667905	2.51448666344199	1.84439217084181	0.174437029253404	0.623482691094875
PF3D7_0319600	0.671875535802304	7.73334739233824	1.83608692911527	0.175410276423509	0.623482691094875
PF3D7_1225800	0.777669863384489	4.01105158863568	1.8359612243827	0.175425055079701	0.623482691094875
PF3D7_1122300	-1.03482397591152	1.33013425200906	1.83212722269543	0.175876495060901	0.623482691094875
PF3D7_1105300	-1.37494945060468	2.13003863602101	1.82915921008041	0.176226887679307	0.623482691094875
PF3D7_0816100	0.823800806565668	2.53637753491222	1.82907871305413	0.176236402065838	0.623482691094875
PF3D7_0717000	-0.984923292467445	1.99426522609892	1.82872180331461	0.176278594328028	0.623482691094875
PF3D7_0726500	0.730096530375905	4.81020841425639	1.82441796945348	0.176788292477584	0.623482691094875
PF3D7_0527900	0.720554291522881	4.37550155829382	1.82385383764346	0.176855227896393	0.623482691094875
PF3D7_0705400	-1.65572965672307	1.60335727910105	1.82282915161858	0.176976883834106	0.623482691094875
PF3D7_1467300	-1.65572965672307	1.80044886113662	1.82282915161858	0.176976883834106	0.623482691094875
PF3D7_1359700	-1.65572965672307	-0.0888813223992436	1.82282915161858	0.176976883834106	0.623482691094875
PF3D7_1248900	0.706513102787675	4.99917793758492	1.82018015221443	0.177291834238148	0.623482691094875
PF3D7_0531700	-0.666221147885733	8.83619524876668	1.81934185572728	0.177391637437458	0.623482691094875
PF3D7_0630800	-1.22345256917426	0.315878148017121	1.81910757216099	0.177419541606355	0.623482691094875
PF3D7_0403700	0.696525667258614	5.30197314788305	1.81870522424419	0.177467474775515	0.623482691094875
PF3D7_0615800	-1.48401022188923	1.53196394179792	1.81700642107219	0.177670024228288	0.623482691094875
PF3D7_0726100	0.824211040936966	3.23032432044018	1.81698376075387	0.177672727836298	0.623482691094875
PF3D7_1121100	0.879768335971065	2.79205143332743	1.8146462528076	0.177951871784512	0.623482691094875
PF3D7_1323700	-0.914534808006526	1.5028210149561	1.81247902963285	0.178211132885918	0.623482691094875
PF3D7_0207000	0.916579143244407	3.79247108685793	1.81220453049585	0.178244001847355	0.623482691094875
PF3D7_0932700	-1.65045387153863	1.10474702260877	1.81176989041686	0.178296060659215	0.623482691094875
PF3D7_1121300	-1.65045387153863	-0.092765259720744	1.81176989041686	0.178296060659216	0.623482691094875
PF3D7_1306800	-0.93270328701114	2.19953109925648	1.80992090816558	0.178517717983074	0.623482691094875
PF3D7_1246600	0.955191850822835	2.76619724866642	1.809499157808	0.17856832229104	0.623482691094875
PF3D7_1208600	1.03807091177845	2.9353418339978	1.80179658103476	0.179495448655842	0.623482691094875
PF3D7_1442800	-1.64516453953624	0.273667879562436	1.80071765333606	0.179625758299234	0.623482691094875
PF3D7_0403500	-1.64527263439313	-0.247350394044947	1.79722728063421	0.180048064900987	0.623482691094875
PF3D7_1307800	-0.879523513699604	2.64968984552568	1.79643492027992	0.180144093870409	0.623482691094875
PF3D7_0306400	3.21465319256958	1.26630562384655	1.79570746551333	0.180232308860419	0.623482691094875
PF3D7_0307300	3.21465319256958	-0.417859981254367	1.79570746551333	0.180232308860419	0.623482691094875
PF3D7_0314700	3.21465319256958	1.48465220771547	1.79570746551333	0.180232308860419	0.623482691094875
PF3D7_0323900	3.21465319256958	-0.382477971492757	1.79570746551333	0.180232308860419	0.623482691094875
PF3D7_0408000	3.21465319256958	0.881893004550026	1.79570746551333	0.180232308860419	0.623482691094875
PF3D7_0411800	3.21465319256958	0.712324815333077	1.79570746551333	0.180232308860419	0.623482691094875
PF3D7_0618100	3.21465319256958	0.643038358867204	1.79570746551333	0.180232308860419	0.623482691094875
PF3D7_0730100	3.21465319256958	0.651957281865669	1.79570746551333	0.180232308860419	0.623482691094875
PF3D7_0906400	3.21465319256958	-0.590067829840057	1.79570746551333	0.180232308860419	0.623482691094875
PF3D7_1017100	3.21465319256958	0.229800998008489	1.79570746551333	0.180232308860419	0.623482691094875
PF3D7_1030900	3.21465319256958	-0.466013660251832	1.79570746551333	0.180232308860419	0.623482691094875
PF3D7_1034400	3.21465319256958	2.04216935739831	1.79570746551333	0.180232308860419	0.623482691094875
PF3D7_1036300	3.21465319256958	-0.638119140057523	1.79570746551333	0.180232308860419	0.623482691094875
PF3D7_1132100	3.21465319256958	-0.330155211124894	1.79570746551333	0.180232308860419	0.623482691094875
PF3D7_1150300	3.21465319256958	-0.512299549168407	1.79570746551333	0.180232308860419	0.623482691094875
PF3D7_1235000	3.21465319256958	-0.270727729429607	1.79570746551333	0.180232308860419	0.623482691094875
PF3D7_1239600	3.21465319256958	1.22682886481664	1.79570746551333	0.180232308860419	0.623482691094875
PF3D7_1300400	3.21465319256958	-0.596299927752928	1.79570746551333	0.180232308860419	0.623482691094875
PF3D7_1413400	3.21465319256958	1.63747184915438	1.79570746551333	0.180232308860419	0.623482691094875
PF3D7_1425400	3.21465319256958	0.664187248495421	1.79570746551333	0.180232308860419	0.623482691094875
PF3D7_1427500	3.21465319256958	2.32716442898174	1.79570746551333	0.180232308860419	0.623482691094875
PF3D7_1478400	3.21465319256958	-0.726752979610516	1.79570746551333	0.180232308860419	0.623482691094875
PF3D7_0701700	3.21465319256958	-0.813138138798579	1.79570746551333	0.180232308860419	0.623482691094875
PF3D7_1254000	3.21465319256958	-0.813138138798579	1.79570746551333	0.180232308860419	0.623482691094875
PF3D7_1430800	3.21465319256958	-0.813138138798579	1.79570746551333	0.180232308860419	0.623482691094875
PF3D7_0115300	3.21465319256958	-0.642142341725062	1.79570746551333	0.180232308860419	0.623482691094875
PF3D7_0200600	3.21465319256958	-0.703640720991828	1.79570746551333	0.180232308860419	0.623482691094875
PF3D7_0201300	3.21465319256958	-0.752052113507128	1.79570746551333	0.180232308860419	0.623482691094875
PF3D7_0315500	3.21465319256958	1.48527422457413	1.79570746551333	0.180232308860419	0.623482691094875
PF3D7_0401400	3.21465319256958	-0.59586475751295	1.79570746551333	0.180232308860419	0.623482691094875
PF3D7_0504600	3.21465319256958	0.817911367115353	1.79570746551333	0.180232308860419	0.623482691094875
PF3D7_0505400	3.21465319256958	1.48383918365133	1.79570746551333	0.180232308860419	0.623482691094875
PF3D7_0713100	3.21465319256958	-0.607421566854601	1.79570746551333	0.180232308860419	0.623482691094875
PF3D7_1100700	3.21465319256958	-0.755058811245457	1.79570746551333	0.180232308860419	0.623482691094875
PF3D7_1127700	3.21465319256958	-0.684010876856435	1.79570746551333	0.180232308860419	0.623482691094875
PF3D7_1136100	3.21465319256958	-0.34068580624776	1.79570746551333	0.180232308860419	0.623482691094875
PF3D7_1255100	3.21465319256958	-0.41416262121647	1.79570746551333	0.180232308860419	0.623482691094875
PF3D7_1319800	3.21465319256958	-0.70614943599616	1.79570746551333	0.180232308860419	0.623482691094875
PF3D7_1413600	3.21465319256958	-0.650836003873034	1.79570746551333	0.180232308860419	0.623482691094875
PF3D7_1431500	3.21465319256958	2.61263640835933	1.79570746551333	0.180232308860419	0.623482691094875
PF3D7_0816600	3.21465319256958	2.60360147711409	1.79570746551332	0.18023230886042	0.623482691094875
PF3D7_0202900	3.21465319256958	0.14479450144155	1.79570746551332	0.18023230886042	0.623482691094875
PF3D7_0215800	3.21465319256958	0.84222591214337	1.79570746551332	0.18023230886042	0.623482691094875
PF3D7_0407800	3.21465319256958	-0.14438156569193	1.79570746551332	0.18023230886042	0.623482691094875
PF3D7_0411100	3.21465319256958	0.287361752987209	1.79570746551332	0.18023230886042	0.623482691094875
PF3D7_0608600	3.21465319256958	0.835998680849424	1.79570746551332	0.18023230886042	0.623482691094875
PF3D7_0718700	3.21465319256958	0.323687769275584	1.79570746551332	0.18023230886042	0.623482691094875
PF3D7_0732500	3.21465319256958	-0.523776121149851	1.79570746551332	0.18023230886042	0.623482691094875
PF3D7_0805000	3.21465319256958	0.832758053422712	1.79570746551332	0.18023230886042	0.623482691094875
PF3D7_0833000	3.21465319256958	-0.0512872763353506	1.79570746551332	0.18023230886042	0.623482691094875
PF3D7_1026900	3.21465319256958	-0.380752227048819	1.79570746551332	0.18023230886042	0.623482691094875
PF3D7_1207200	3.21465319256958	0.53552478676348	1.79570746551332	0.18023230886042	0.623482691094875
PF3D7_1220600	3.21465319256958	0.695175279548391	1.79570746551332	0.18023230886042	0.623482691094875
PF3D7_1349900	3.21465319256958	-0.169211617155198	1.79570746551332	0.18023230886042	0.623482691094875
PF3D7_1446800	3.21465319256958	1.31492714540236	1.79570746551332	0.18023230886042	0.623482691094875
PF3D7_1023800	3.20936386056718	-0.510390031700138	1.7904522572049	0.180871069608768	0.623482691094875
PF3D7_0301400	3.20936386056718	-0.533816862741147	1.7904522572049	0.180871069608769	0.623482691094875
PF3D7_0312700	3.20936386056718	-0.454397483318711	1.7904522572049	0.180871069608769	0.623482691094875
PF3D7_0628500	3.20936386056718	0.28139390252673	1.7904522572049	0.180871069608769	0.623482691094875
PF3D7_0721500	3.20936386056718	0.042436623082873	1.7904522572049	0.180871069608769	0.623482691094875
PF3D7_1326200	3.20936386056718	-0.0288778057272887	1.7904522572049	0.180871069608769	0.623482691094875
PF3D7_1404700	3.20936386056718	-0.570027724238019	1.7904522572049	0.180871069608769	0.623482691094875
PF3D7_0923500	3.20936386056718	1.25759520595908	1.7904522572049	0.180871069608769	0.623482691094875
PF3D7_1464400	0.711215175342583	4.80879074209649	1.79020408296945	0.180901299432455	0.623482691094875
PF3D7_0305700	0.699584491423413	5.33460888742612	1.7900833487428	0.180916008046516	0.623482691094875
PF3D7_1037200	-1.6433868989302	-0.149316505340951	1.78893888075033	0.181055503204737	0.623482691094875
PF3D7_1200700	0.682463455916418	6.52490951190192	1.78596081785874	0.181419072599874	0.623482691094875
PF3D7_0510400	-1.35833323813615	0.549198783424425	1.78578249651458	0.18144086932111	0.623482691094875
PF3D7_0103100	3.20408807538274	1.44667876317697	1.78522437012042	0.181509110283367	0.623482691094875
PF3D7_0203000	3.20408807538274	0.884705936207935	1.78522437012042	0.181509110283367	0.623482691094875
PF3D7_0306500	3.20408807538274	1.68517802594325	1.78522437012042	0.181509110283367	0.623482691094875
PF3D7_0310400	3.20408807538274	1.33213182390777	1.78522437012042	0.181509110283367	0.623482691094875
PF3D7_0311900	3.20408807538274	-0.228548082153974	1.78522437012042	0.181509110283367	0.623482691094875
PF3D7_0403100	3.20408807538274	0.258570995707459	1.78522437012042	0.181509110283367	0.623482691094875
PF3D7_0425400	3.20408807538274	-0.494141350148161	1.78522437012042	0.181509110283367	0.623482691094875
PF3D7_0828800	3.20408807538274	-0.265905147862592	1.78522437012042	0.181509110283367	0.623482691094875
PF3D7_0908200	3.20408807538274	0.76930767569147	1.78522437012042	0.181509110283367	0.623482691094875
PF3D7_1017200	3.20408807538274	0.999229407621787	1.78522437012042	0.181509110283367	0.623482691094875
PF3D7_1018200	3.20408807538274	0.221050874889846	1.78522437012042	0.181509110283367	0.623482691094875
PF3D7_1032200	3.20408807538274	-0.204418768215569	1.78522437012042	0.181509110283367	0.623482691094875
PF3D7_1209500.1	3.20408807538274	0.28756659156464	1.78522437012042	0.181509110283367	0.623482691094875
PF3D7_1209500.2	3.20408807538274	0.28756659156464	1.78522437012042	0.181509110283367	0.623482691094875
PF3D7_1234300	3.20408807538274	0.931689898452013	1.78522437012042	0.181509110283367	0.623482691094875
PF3D7_1235200	3.20408807538274	-0.271406911143638	1.78522437012042	0.181509110283367	0.623482691094875
PF3D7_1312000	3.20408807538274	-0.131081042942456	1.78522437012042	0.181509110283367	0.623482691094875
PF3D7_1312600	3.20408807538274	0.426924401352065	1.78522437012042	0.181509110283367	0.623482691094875
PF3D7_1368700	3.20408807538274	0.540744241698926	1.78522437012042	0.181509110283367	0.623482691094875
PF3D7_1372400	3.20408807538274	1.40109734833325	1.78522437012042	0.181509110283367	0.623482691094875
PF3D7_1469900	3.20408807538274	0.386752750515504	1.78522437012042	0.181509110283367	0.623482691094875
PF3D7_0221100	3.20408807538274	-0.76481381460146	1.78522437012042	0.181509110283367	0.623482691094875
PF3D7_0305800	3.20408807538274	-0.56547053917863	1.78522437012042	0.181509110283367	0.623482691094875
PF3D7_0401300	3.20408807538274	-0.138942018215216	1.78522437012042	0.181509110283367	0.623482691094875
PF3D7_0404400	3.20408807538274	0.0288653517569081	1.78522437012042	0.181509110283367	0.623482691094875
PF3D7_0425600	3.20408807538274	-0.575181533350763	1.78522437012042	0.181509110283367	0.623482691094875
PF3D7_0511400	3.20408807538274	-0.498966035560395	1.78522437012042	0.181509110283367	0.623482691094875
PF3D7_0620600	3.20408807538274	-0.58499199799853	1.78522437012042	0.181509110283367	0.623482691094875
PF3D7_0706900	3.20408807538274	-0.731468954037363	1.78522437012042	0.181509110283367	0.623482691094875
PF3D7_1003200	3.20408807538274	2.08011100108261	1.78522437012042	0.181509110283367	0.623482691094875
PF3D7_1009700	3.20408807538274	-0.517121140844552	1.78522437012042	0.181509110283367	0.623482691094875
PF3D7_1017000	3.20408807538274	2.46992286170622	1.78522437012042	0.181509110283367	0.623482691094875
PF3D7_1101300	3.20408807538274	0.342948810738048	1.78522437012042	0.181509110283367	0.623482691094875
PF3D7_1147200	3.20408807538274	-0.573512555571683	1.78522437012042	0.181509110283367	0.623482691094875
PF3D7_1210700	3.20408807538274	0.897649829298286	1.78522437012042	0.181509110283367	0.623482691094875
PF3D7_1213500	3.20408807538274	0.00433701096672095	1.78522437012042	0.181509110283367	0.623482691094875
PF3D7_1215200	3.20408807538274	1.96178206209881	1.78522437012042	0.181509110283367	0.623482691094875
PF3D7_1221100	3.20408807538274	-0.0950403346227102	1.78522437012042	0.181509110283367	0.623482691094875
PF3D7_1308700	3.20408807538274	1.27323953375179	1.78522437012042	0.181509110283367	0.623482691094875
PF3D7_1400800	3.20408807538274	-0.784071828226473	1.78522437012042	0.181509110283367	0.623482691094875
PF3D7_1422100	3.20408807538274	1.57790388980309	1.78522437012042	0.181509110283367	0.623482691094875
PF3D7_1459100	3.20408807538274	0.626573085540392	1.78522437012042	0.181509110283367	0.623482691094875
PF3D7_0209500	3.20408807538274	-0.788862052963604	1.78522437012042	0.181509110283368	0.623482691094875
PF3D7_1341800	3.20408807538274	-0.813424073169496	1.78522437012042	0.181509110283368	0.623482691094875
PF3D7_1400500	3.20408807538274	-0.813424073169496	1.78522437012042	0.181509110283368	0.623482691094875
PF3D7_0917500	3.20408807538274	1.51877866630523	1.78522437012041	0.181509110283368	0.623482691094875
PF3D7_1004900	3.20408807538274	2.68019607711626	1.78522437012041	0.181509110283368	0.623482691094875
PF3D7_0115100	3.20408807538274	-0.605234016117925	1.78522437012041	0.181509110283368	0.623482691094875
PF3D7_0308800	3.20408807538274	1.73755317613037	1.78522437012041	0.181509110283368	0.623482691094875
PF3D7_0400900	3.20408807538274	-0.654790639364427	1.78522437012041	0.181509110283368	0.623482691094875
PF3D7_0521100	3.20408807538274	-0.444614840967859	1.78522437012041	0.181509110283368	0.623482691094875
PF3D7_0611100	3.20408807538274	0.919180225885369	1.78522437012041	0.181509110283368	0.623482691094875
PF3D7_0623400	3.20408807538274	-0.61530018059127	1.78522437012041	0.181509110283368	0.623482691094875
PF3D7_0624700	3.20408807538274	1.14491093869375	1.78522437012041	0.181509110283368	0.623482691094875
PF3D7_0631900	3.20408807538274	0.604064610238805	1.78522437012041	0.181509110283368	0.623482691094875
PF3D7_0715300	3.20408807538274	0.480096012327875	1.78522437012041	0.181509110283368	0.623482691094875
PF3D7_0819300	3.20408807538274	0.150351846986532	1.78522437012041	0.181509110283368	0.623482691094875
PF3D7_0900400	3.20408807538274	0.401893121089069	1.78522437012041	0.181509110283368	0.623482691094875
PF3D7_0906200	3.20408807538274	-0.17593596359278	1.78522437012041	0.181509110283368	0.623482691094875
PF3D7_0912200	3.20408807538274	-0.274284755307492	1.78522437012041	0.181509110283368	0.623482691094875
PF3D7_0920600	3.20408807538274	0.68235748960397	1.78522437012041	0.181509110283368	0.623482691094875
PF3D7_1011300	3.20408807538274	0.0315175151104366	1.78522437012041	0.181509110283368	0.623482691094875
PF3D7_1026500	3.20408807538274	-0.576880320288856	1.78522437012041	0.181509110283368	0.623482691094875
PF3D7_1035600	3.20408807538274	-0.612017419276075	1.78522437012041	0.181509110283368	0.623482691094875
PF3D7_1105900	3.20408807538274	-0.482722932396351	1.78522437012041	0.181509110283368	0.623482691094875
PF3D7_1120300	3.20408807538274	0.606999574742501	1.78522437012041	0.181509110283368	0.623482691094875
PF3D7_1125600	3.20408807538274	1.03078607850288	1.78522437012041	0.181509110283368	0.623482691094875
PF3D7_1131600	3.20408807538274	0.369193912033807	1.78522437012041	0.181509110283368	0.623482691094875
PF3D7_1141200	3.20408807538274	1.64909920132988	1.78522437012041	0.181509110283368	0.623482691094875
PF3D7_1144800	3.20408807538274	-0.441038218072606	1.78522437012041	0.181509110283368	0.623482691094875
PF3D7_1209400	3.20408807538274	0.97985320908036	1.78522437012041	0.181509110283368	0.623482691094875
PF3D7_1219700	3.20408807538274	-0.495298347829685	1.78522437012041	0.181509110283368	0.623482691094875
PF3D7_1224700	3.20408807538274	0.891528170480759	1.78522437012041	0.181509110283368	0.623482691094875
PF3D7_1238600	3.20408807538274	0.488515569995112	1.78522437012041	0.181509110283368	0.623482691094875
PF3D7_1243400	3.20408807538274	0.150321809853333	1.78522437012041	0.181509110283368	0.623482691094875
PF3D7_1300500	3.20408807538274	-0.227363586048202	1.78522437012041	0.181509110283368	0.623482691094875
PF3D7_1300600	3.20408807538274	-0.194328308349264	1.78522437012041	0.181509110283368	0.623482691094875
PF3D7_1318100	3.20408807538274	2.08673298434605	1.78522437012041	0.181509110283368	0.623482691094875
PF3D7_1401000	3.20408807538274	0.95877926853286	1.78522437012041	0.181509110283368	0.623482691094875
PF3D7_1420800	3.20408807538274	-0.488396508537726	1.78522437012041	0.181509110283368	0.623482691094875
PF3D7_1437100	3.20408807538274	-0.38087045541234	1.78522437012041	0.181509110283368	0.623482691094875
PF3D7_1447500	3.20408807538274	-0.445517081172105	1.78522437012041	0.181509110283368	0.623482691094875
PF3D7_1457800	3.20408807538274	-0.321229050797498	1.78522437012041	0.181509110283368	0.623482691094875
PF3D7_1475800	3.20408807538274	-0.148195840538245	1.78522437012041	0.181509110283368	0.623482691094875
PF3D7_0412300	3.20408807538274	-0.129591313680617	1.78522437012041	0.181509110283368	0.623482691094875
PF3D7_1143100	-1.35645734188707	0.28771458962201	1.781843158598	0.181923159970488	0.624258276198698
PF3D7_0911100	-1.4707114368811	0.160948130867852	1.78128671055131	0.181991405145864	0.624258276198698
PF3D7_0407200	0.681038267088218	5.41060686091708	1.78067770877903	0.182066129722613	0.624258276198698
PF3D7_0503500	1.19915927693616	1.21737219480265	1.77595009821817	0.182647418450026	0.625871820555424
PF3D7_0619200	0.90686986271874	2.34004459822916	1.77320142268094	0.182986373528823	0.626280445878816
PF3D7_0419300	1.46215511220487	0.597001186268308	1.77318660757715	0.1829882024393	0.626280445878816
PF3D7_1419600	0.807494117170254	2.97332024224538	1.76856690079272	0.183559535828685	0.627855786796966
PF3D7_1436900	-0.96354981672456	1.61744213613314	1.7640632547551	0.184118507844144	0.629248317674154
PF3D7_1458800	-0.911314291450005	1.67202595020245	1.76349449135801	0.184189240493584	0.629248317674154
PF3D7_1035900	1.08194239651554	0.66462127169609	1.76015828667254	0.184604773585215	0.630287071165946
PF3D7_0214900	-1.17190995847427	0.794530566176198	1.75529918222733	0.185211935834061	0.631978446110913
PF3D7_1437500	-0.828204402286479	2.84914260894022	1.749759998835	0.185906906698187	0.633967219826027
PF3D7_0705100	-1.61933224324854	0.278334894914106	1.74630203295605	0.186342294501917	0.634304234264804
PF3D7_1341000	-1.61933224324854	-0.279810149703686	1.74630203295605	0.186342294501917	0.634304234264804
PF3D7_1358000	-1.61933224324854	0.0196118629567743	1.74630203295605	0.186342294501917	0.634304234264804
PF3D7_0619100	-0.925087022029532	1.35977381253948	1.74172544673596	0.186920349670179	0.635633001802105
PF3D7_1440800	-0.865197488365318	2.50995763214743	1.74053496681037	0.187071057187957	0.635633001802105
PF3D7_1406000	0.743834233395585	4.79835043990233	1.73709941639102	0.187506769911024	0.635633001802105
PF3D7_1315500	0.684248189023961	5.1912834568204	1.73682817854104	0.187541219820132	0.635633001802105
PF3D7_0607100	0.770559781695208	3.05569736041058	1.73626201420942	0.187613152057088	0.635633001802105
PF3D7_0804800	-0.831666540531759	2.58236487389225	1.73543570979576	0.18771819319128	0.635633001802105
PF3D7_0108000	0.673359983610324	6.2572235336046	1.73497647467838	0.187776601470605	0.635633001802105
PF3D7_0501100.1	0.661605320158213	6.3252473425542	1.73405039045224	0.187894450748289	0.635633001802105
PF3D7_0501100.2	0.661605320158213	6.3252473425542	1.73405039045224	0.187894450748289	0.635633001802105
PF3D7_0530000	1.12406812394755	2.60740732484152	1.73383819039799	0.187921466482096	0.635633001802105
PF3D7_0922700	0.734535100064413	4.22453996228613	1.73346262025151	0.187969292361712	0.635633001802105
PF3D7_0922800	1.11776511387631	2.40740334185365	1.73224631874307	0.18812427595288	0.635776841743922
PF3D7_0801700	-0.909028736286089	2.63594696913824	1.73070424802945	0.188320983562227	0.635930211644225
PF3D7_1249600	1.05667338736948	1.55789988815116	1.72949776436768	0.188475050390601	0.635930211644225
PF3D7_1234700	-1.220635590292	1.01012020010564	1.72924708139729	0.188507080777453	0.635930211644225
PF3D7_1341900	0.674305521983931	6.10248088170931	1.72459917040346	0.189102105599452	0.637557128836794
PF3D7_1253300	0.661819436079939	5.89477109577259	1.72285668038496	0.189325742408268	0.63779773565019
PF3D7_0529100	1.06191470007044	2.81011481187049	1.72228578492611	0.189399079971112	0.63779773565019
PF3D7_0512100	-0.968831127709977	2.31121203255316	1.71822041461394	0.189922277911608	0.63917890435252
PF3D7_0608500	0.687565598904083	5.58607392953834	1.71535768253315	0.190291711532357	0.639276246927328
PF3D7_1208400	1.43556533112524	0.279365935561256	1.71323811865278	0.190565779598103	0.639276246927328
PF3D7_1434300	0.690567148338355	5.34030613042978	1.7122564051303	0.190692875009015	0.639276246927328
PF3D7_1429100	-1.01931548089339	1.899828198615	1.71204272039091	0.190720552337661	0.639276246927328
PF3D7_0109800	-0.668871487990369	5.07635563705778	1.71163376232289	0.190773535336489	0.639276246927328
PF3D7_1441600	-1.2475236858857	1.30277876875865	1.71146011645531	0.190796037403617	0.639276246927328
PF3D7_1008500	-0.815099302107757	2.40226734676757	1.71114048729314	0.190837464949904	0.639276246927328
PF3D7_0617500	1.78023490851404	0.256532437076849	1.71012774176013	0.190968797499161	0.639276246927328
PF3D7_1330700	1.78023490851404	1.87823618045546	1.71012774176013	0.190968797499161	0.639276246927328
PF3D7_1320400	-1.32791857775445	0.996335305355301	1.70846127929329	0.191185133405168	0.639621742173266
PF3D7_1471100	0.643963009529786	9.28928940929206	1.70697293463202	0.191378588240524	0.639870886315312
PF3D7_0418900	-1.43528860082821	1.28652152597154	1.70614773363662	0.191485946170058	0.639870886315312
PF3D7_0514200	-0.832474965561316	2.09879480751073	1.69883264414289	0.192440712577489	0.641762240842075
PF3D7_1253000	-0.696306362700538	4.74058344409543	1.69878387224627	0.192447096917417	0.641762240842075
PF3D7_1223100	0.921910557423016	2.56651868635141	1.69712202631607	0.192664783789887	0.641762240842075
PF3D7_1323400	0.646204583340682	7.64220377641608	1.69701305042533	0.192679068696209	0.641762240842075
PF3D7_1309400	0.908555422834285	2.72476757484718	1.69670097515314	0.192719983359622	0.641762240842075
PF3D7_1006900	0.689935824616539	4.89908377971721	1.69557165441763	0.192868127913123	0.641762240842075
PF3D7_0503300	0.684362461558738	5.27358532190528	1.69556188902456	0.192869409519618	0.641762240842075
PF3D7_1204700	-1.43034850180412	3.33811710651155	1.69487185442187	0.192959994593479	0.641762240842075
PF3D7_1456900	0.767417214162795	3.13438169722148	1.69161508730377	0.193388201899059	0.642808285442257
PF3D7_0702000	0.852483561629536	2.38413472972381	1.68838727524584	0.193813698269727	0.643422343621057
PF3D7_0515800	-1.59074233637856	0.837333865978515	1.68767596310522	0.193907611893163	0.643422343621057
PF3D7_1132700	-0.782256277791837	2.14624931783143	1.68762502561122	0.193914339145787	0.643422343621057
PF3D7_1007500	-1.43022878011034	0.464473719808799	1.68580462442736	0.194154936541491	0.643842821821459
PF3D7_1139900	-0.716057876633307	3.44537870990367	1.68362398247285	0.194443605645829	0.644120253934987
PF3D7_0934500	0.670389260495369	5.28204914543636	1.68026441733911	0.194889321377518	0.644120253934987
PF3D7_0903500	0.862983241706295	2.44661649243055	1.6796357973502	0.194972853503652	0.644120253934987
PF3D7_0812400	0.660347696783855	6.02766075378084	1.67942366519146	0.195001051450183	0.644120253934987
PF3D7_1418000	0.694658143325222	4.440119710996	1.67787688677373	0.195206803331879	0.644120253934987
PF3D7_1470000	-1.23448083175013	0.894353518288089	1.67685788270127	0.195342489695643	0.644120253934987
PF3D7_0731500	0.743448244745366	4.03820705112839	1.67648800023373	0.19539176901866	0.644120253934987
PF3D7_1441900	-1.05137170266068	1.12649487313815	1.67593585859877	0.195465357748665	0.644120253934987
PF3D7_0910100	0.701023798076631	4.20484397932104	1.67554998611476	0.195516805598596	0.644120253934987
PF3D7_1451800	0.727874755837196	4.52707383341829	1.67370471505552	0.195763052337493	0.644120253934987
PF3D7_1426800	0.753354213295234	3.19694036597558	1.67334487092405	0.1958111149225	0.644120253934987
PF3D7_0819200	-1.58339943283786	0.477522714399835	1.6725724911994	0.195914324492869	0.644120253934987
PF3D7_1354100	-1.58339943283786	-0.152885132295502	1.6725724911994	0.195914324492869	0.644120253934987
PF3D7_0705500	-0.688947117074008	4.42683606475783	1.67238969885039	0.19593875951947	0.644120253934987
PF3D7_0529700	-1.2309589928423	0.213953109433595	1.67232475420004	0.195947441946972	0.644120253934987
PF3D7_1413800	-0.706413680783698	3.47833135894668	1.6705045738863	0.196190964585668	0.644305831493914
PF3D7_0517900	-1.58641154649857	0.197165850939379	1.67019955467295	0.196231807893972	0.644305831493914
PF3D7_0926600	1.75799696179631	-0.0201033977154009	1.66696345720993	0.196665748439729	0.645355857039016
PF3D7_0731400	-1.30608286275951	1.41568398045211	1.66134816342772	0.197421395820929	0.6472927810997
PF3D7_1124500	1.41801377318264	0.720031845067629	1.66087685103956	0.197484974778384	0.6472927810997
PF3D7_1363000	-0.950155667124085	1.2382033785633	1.65771228963998	0.197912489188113	0.64788590804869
PF3D7_1436100	-0.898482492095134	1.70419706290226	1.65747137232564	0.197945080195767	0.64788590804869
PF3D7_0516800	-1.30384124792719	0.978805489637265	1.65651984941422	0.19807386262861	0.64788590804869
PF3D7_0422700	0.680155883170253	5.00698548975012	1.65591644394368	0.198155580556193	0.64788590804869
PF3D7_0209300	-1.41314861840051	1.81393893970428	1.65530166953106	0.198238878833434	0.64788590804869
PF3D7_1001200	-1.57283431565102	4.48019744603609	1.65138316231921	0.198770779822885	0.648499705204039
PF3D7_1334300	-1.57283431565102	3.44239415131749	1.65138316231921	0.198770779822886	0.648499705204039
PF3D7_1242000	-1.57283431565102	0.420227187768442	1.65138316231921	0.198770779822886	0.648499705204039
PF3D7_0903000	-1.13670568472307	2.43828762537479	1.65021769380589	0.198929304393832	0.648568089293003
PF3D7_0410100	-1.41082351955596	0.612048817853867	1.64954287736436	0.199021159342653	0.648568089293003
PF3D7_1205600	1.17466221375162	3.44525230980054	1.64744269408506	0.199307351773151	0.649126593851034
PF3D7_1348900	-1.09438356306037	1.60913804615844	1.64602498384864	0.199500816661236	0.649382623720568
PF3D7_1344200	-0.68485439240968	3.41046176244293	1.64179902602964	0.200078813219963	0.650889303766209
PF3D7_0909900	-0.759955260265318	3.13187954453543	1.6405970446557	0.200243570914418	0.65105069002307
PF3D7_1013800	-1.29712867572684	0.719158558011435	1.63571215799275	0.200914793750018	0.652857611415289
PF3D7_0708100	0.788972131154711	3.16608454821346	1.63422116900553	0.201120194291487	0.653149671754203
PF3D7_0217700	0.929187809675572	2.55222579311743	1.63232388766635	0.201381923326339	0.653525856857496
PF3D7_0617000	0.683269667721809	4.68878785204208	1.6317063156772	0.201467203484721	0.653525856857496
PF3D7_1145200	-1.06670568252552	0.356916068650469	1.62698712996366	0.202120277751317	0.654893157924757
PF3D7_0935200	0.793689448061649	3.0551301329101	1.62698647917631	0.202120367983499	0.654893157924757
PF3D7_1300300	-0.846332148220866	2.18803420022234	1.62543804094405	0.202335194490615	0.655213739776596
PF3D7_1032500	0.741575764643058	3.44363166727502	1.62262359062338	0.20272635304277	0.6558213878741
PF3D7_1415600	-0.794668242460354	2.29475927332535	1.6210446274314	0.202946190702899	0.6558213878741
PF3D7_0702500	0.625915717084036	10.1328391900969	1.62094082632106	0.202960652672147	0.6558213878741
PF3D7_1408400	1.00443932360823	2.65315584747544	1.61992856761444	0.203101748090602	0.6558213878741
PF3D7_0310700	-0.730038754543267	3.29206073150299	1.6199209999699	0.203102803354713	0.6558213878741
PF3D7_0707900	0.678808719158834	4.45474358013012	1.61678418631541	0.20354077052932	0.656860454664826
PF3D7_1326500	-1.55364172183643	0.443079958717137	1.61156647060438	0.204271744352156	0.658533841890581
PF3D7_1144900	0.657063011736384	5.06879746626826	1.6114204468346	0.204292245963226	0.658533841890581
PF3D7_1458700	-1.17785814032834	2.26979873834871	1.60838282485976	0.204719276138203	0.659534351729572
PF3D7_1463700	-0.779352131384705	2.07263588130235	1.59937049934521	0.205992442962701	0.662851569694915
PF3D7_1338300	0.627517572069826	7.46908752376411	1.59899580951292	0.206045577225957	0.662851569694915
PF3D7_1141100	-1.14106917271666	0.921727249048705	1.59860758957338	0.206100647245076	0.662851569694915
PF3D7_1246400	1.08712131003112	1.3690009355099	1.59713171417506	0.206310162732962	0.663148186521983
PF3D7_1325400	-1.09342558627224	0.600819060684875	1.59569835192655	0.206513883843718	0.663425851847943
PF3D7_1338800	-1.05506020362334	0.931989192898217	1.59308220981476	0.206886324200638	0.663715121853193
PF3D7_0424600	0.631859377403884	7.01301642380417	1.59167703596651	0.207086695727545	0.663715121853193
PF3D7_1461200	-0.731037149612531	3.18256946608381	1.5914411217595	0.207120358518264	0.663715121853193
PF3D7_1002400.1	0.635287731090131	6.49449127317577	1.59094709912719	0.2071908719616	0.663715121853193
PF3D7_1002400.2	0.635287731090131	6.49449127317577	1.59094709912719	0.2071908719616	0.663715121853193
PF3D7_0822600	0.684623201505874	4.64134115189834	1.58966134300719	0.207374525124419	0.663927273529709
PF3D7_0203200	-0.964600937218117	1.31410022959649	1.58759745121994	0.207669727105221	0.664496116045795
PF3D7_1350500	0.681779163041685	4.23966264092232	1.58525156240429	0.208005867082806	0.665195233306666
PF3D7_1217300	-1.19638366361379	1.90738766066684	1.58401645369937	0.208183103059729	0.665385678179597
PF3D7_0800700	1.71311234957045	-0.178567022642212	1.58270121839145	0.208372033472901	0.665613263986318
PF3D7_0504900	-1.19428910307055	2.76600483022784	1.57924698208687	0.208869192987932	0.666824628545323
PF3D7_1139400	-0.796368262646762	1.72440135990859	1.57786021401363	0.209069181802377	0.667086429972145
PF3D7_1132200	0.652797459041862	5.68696953702829	1.57312563130533	0.209753676292436	0.668370394289455
PF3D7_0309400	-1.19329017340654	0.36361364557885	1.57236794544848	0.209863463623183	0.668370394289455
PF3D7_0830400	0.618858802356159	8.18273354487343	1.57196998118359	0.209921155196499	0.668370394289455
PF3D7_1025800	1.01188305466012	2.20874221439712	1.571809449214	0.209944432305991	0.668370394289455
PF3D7_0627400	0.984923347497392	2.12354556790111	1.56935604174755	0.210300556699496	0.66906281166904
PF3D7_0518700	1.1324632227542	0.872889898098641	1.56868147349687	0.210398599071021	0.66906281166904
PF3D7_1130200	0.622855733376874	7.14773718041764	1.56483897488177	0.21095810551209	0.670084778597786
PF3D7_0606100	0.65876798530897	4.78675140400834	1.56404783600577	0.21107352211943	0.670084778597786
PF3D7_0710700	-0.828201455227717	1.7957408944468	1.5640341450465	0.21107552010659	0.670084778597786
PF3D7_1136400	-0.711345546106282	3.31624115442774	1.56202712576699	0.211368656769132	0.670308287762314
PF3D7_1326300	0.733478832686944	3.48414638520683	1.5613955362102	0.211461003882635	0.670308287762314
PF3D7_1253100	-0.674276754183333	3.51250432367202	1.56025435957125	0.211627981026824	0.670308287762314
PF3D7_1224200	-1.02532331315757	0.833542117434247	1.55975263427176	0.211701443040645	0.670308287762314
PF3D7_0110300	-1.26453511398711	0.408231609719724	1.5594982679185	0.211738698610451	0.670308287762314
PF3D7_1011700	0.7321612269117	3.33691815858379	1.55692587130849	0.212115900071293	0.670972956420542
PF3D7_0319200	0.894288937804517	2.63794415831781	1.55644840715471	0.212186000367869	0.670972956420542
PF3D7_1014400	-0.86294140303414	1.9419759660359	1.5554419867289	0.212333850994539	0.671006481982574
PF3D7_1113400	0.624651500619988	6.69001491802255	1.55476102452904	0.21243395874581	0.671006481982574
PF3D7_1464900	0.670686886815544	4.70361165123759	1.55389249762797	0.212561721546217	0.671035161151485
PF3D7_1107000	-0.645226931411811	4.74209220879175	1.55151280070212	0.212912249423293	0.671764073411307
PF3D7_0800200	-1.18334080947823	0.930037943963965	1.5506419254245	0.213040700319951	0.671764073411307
PF3D7_1137000	-0.611351570475635	17.7292557501682	1.54990779488844	0.213149053360432	0.671764073411307
PF3D7_1220300	-1.25770295262159	1.34566061466918	1.54276686902204	0.214206431684203	0.674537565488272
PF3D7_1314600	-1.12466357902536	1.3455373428557	1.54235451128136	0.214267680866101	0.674537565488272
PF3D7_0112000	-0.881832412355073	2.25331435955042	1.54062697341393	0.214524505553184	0.67497025842944
PF3D7_0606900	-0.758966766236865	2.72221359531909	1.53632290844291	0.215165963782683	0.67656908129706
PF3D7_1107600	1.68726270485435	0.100575102999884	1.53561302637344	0.215271980412701	0.67656908129706
PF3D7_0409800	-0.685720783685007	2.98689049692492	1.53360731240015	0.215571857808671	0.676877650530272
PF3D7_0501000	0.617243963518753	7.37323591040959	1.53296365155131	0.215668197875313	0.676877650530272
PF3D7_1030200	-0.800819603352913	2.01576283943968	1.53208351024186	0.215800016153119	0.676877650530272
PF3D7_0210200	-1.02043224072534	2.47870165110195	1.53165278354243	0.215864560799764	0.676877650530272
PF3D7_1220100	0.846102252526036	2.47778900437322	1.53095785613788	0.215968744527169	0.676877650530272
PF3D7_1129800	1.6831426412923	0.469487168929941	1.52789138746872	0.216429185936643	0.677790911987229
PF3D7_0713300	0.763412176664439	2.58765382135891	1.52742118679933	0.216499891589836	0.677790911987229
PF3D7_1025000	0.767959204773348	2.96864152732268	1.52421717897426	0.216982422168018	0.678283229002083
PF3D7_1468500	-0.903107213509162	2.53081703002083	1.52347947138504	0.217093703930536	0.678283229002083
PF3D7_1467600	1.04602565989944	0.823405159434891	1.52245938199473	0.217247694495318	0.678283229002083
PF3D7_0315400	-1.17243285607563	1.38939134461994	1.52245536965111	0.21724830044728	0.678283229002083
PF3D7_1420300	-1.24847175571615	0.737128945759236	1.52093421161372	0.21747817390994	0.678283229002083
PF3D7_1406600	1.67902660888647	1.15171052154421	1.52020167081362	0.217588976993093	0.678283229002083
PF3D7_0715500	1.67902660888647	3.87443042803002	1.52020167081361	0.217588976993094	0.678283229002083
PF3D7_1250200	0.709243340298437	3.91163693409773	1.5195385772553	0.217689333616078	0.678283229002083
PF3D7_0618800	-1.06700318840557	0.378750565856145	1.51879004128068	0.217802687926605	0.678283229002083
PF3D7_0819600	0.957169076776038	2.05906513533048	1.51843287948138	0.217856799410644	0.678283229002083
PF3D7_1364200	-0.721645243246927	3.0093794536665	1.51327869147386	0.218639468015382	0.680345378183251
PF3D7_1124400	-0.834468221204567	2.21024251993726	1.50932282565919	0.219242446248428	0.681762056788366
PF3D7_1414000	-0.93236388716558	3.9821135466036	1.50871087729743	0.219335900477191	0.681762056788366
PF3D7_1443900	-1.02070219703232	3.61528776061781	1.50201367206663	0.2203617853738	0.6845744695074
PF3D7_0414400	1.3628034370211	-0.30003762940814	1.49903944081656	0.220819218803601	0.684689368543945
PF3D7_0211200	-1.4966663694048	1.59443784007497	1.49890402994183	0.220840071840474	0.684689368543945
PF3D7_0913900	0.888917784252421	1.64546178129018	1.49828955104821	0.220934730093449	0.684689368543945
PF3D7_0311100	0.687759925534096	3.40023373605155	1.49690092168385	0.221148822145066	0.684689368543945
PF3D7_1344400	-0.826208817377222	0.740525375800441	1.49684600543565	0.221157293959565	0.684689368543945
PF3D7_0214600	1.34549148431779	0.23016987605631	1.49646433056724	0.221216184863103	0.684689368543945
PF3D7_0907800	0.790688449470695	3.24588356028224	1.49626817293414	0.221246458494833	0.684689368543945
PF3D7_0907900	-0.872738001680839	4.65519698626859	1.49542009715864	0.221377401751398	0.684719819202628
PF3D7_1304900	0.658854072423186	4.68707120717549	1.49396039500654	0.221602997487203	0.68504283640932
PF3D7_1115900	-0.809829202079631	1.93523312465394	1.4895086922162	0.222292704663214	0.686715014417926
PF3D7_1407800	0.604423944337398	7.65969125757422	1.48791154564003	0.22254077824558	0.686715014417926
PF3D7_1007400	0.991687496556167	1.79883989475032	1.48748393948707	0.222607251539929	0.686715014417926
PF3D7_1455800	1.66090469457457	0.350423900688346	1.48733923013742	0.222629752640265	0.686715014417926
PF3D7_0703200	-1.09946604636449	1.85607384770155	1.48478983952235	0.223026608602104	0.687564037642473
PF3D7_1122900	-0.872914871325014	1.22172267814662	1.48219039665223	0.22343212866106	0.688438831307702
PF3D7_1026800	0.603292138910527	7.73135698471988	1.48129485985849	0.223572039319991	0.688494722393916
PF3D7_1305300	-0.675378263309888	4.29116707392869	1.47968606559347	0.223823646709914	0.68889433777782
PF3D7_0205700.1	-0.687744275936297	3.28468948152705	1.47712793230535	0.224224425139696	0.689377324491485
PF3D7_0205700.2	-0.687744275936297	3.28468948152705	1.47712793230535	0.224224425139696	0.689377324491485
PF3D7_0407500	-0.902240972508561	1.59550326460345	1.47368432166776	0.224765289226962	0.690599682256655
PF3D7_1361900	1.65267668329445	3.3783962240304	1.47222299429314	0.224995282565443	0.690599682256655
PF3D7_1431900	1.65267668329445	-0.0389456243188884	1.47222299429314	0.224995282565443	0.690599682256655
PF3D7_1428500	-0.928313111897074	2.44059582006425	1.47144292728938	0.225118170219988	0.690599682256655
PF3D7_1111200	0.790188924101545	2.79461520680847	1.47071623034677	0.225232722688587	0.690599682256655
PF3D7_0404900	-0.851467514311371	1.71735626767354	1.46749952891653	0.225740626447296	0.691781843866131
PF3D7_1202700	0.666657274654546	3.72440021070932	1.46633050015224	0.225925551717213	0.691803596619397
PF3D7_0707000	-0.919706058106715	0.689236944688238	1.46590795447453	0.225992437735413	0.691803596619397
PF3D7_1218200	-0.828561083907032	2.08082881242677	1.46439564135473	0.226232021201101	0.691810990850994
PF3D7_1450100	0.66287303061495	3.73566813670897	1.46434803009936	0.226239568815615	0.691810990850994
PF3D7_1217700	-0.826311257600096	2.10617530464659	1.46125836378839	0.226730008017892	0.69275890162149
PF3D7_1126800	-1.32583287602865	0.0610639897426178	1.46085198080513	0.226794610346901	0.69275890162149
PF3D7_0204400	1.64446497439964	0.790352542244409	1.45723275299786	0.227370932394318	0.694144304404684
PF3D7_1469300	-0.748501259792183	2.68507263163846	1.456006240182	0.227566640231745	0.694366855839333
PF3D7_1037100	-0.982405283059179	2.90654819660093	1.45392643326906	0.227898966567546	0.695005802035008
PF3D7_0626300	-1.21654118241978	0.271012274980996	1.44584535318992	0.229195772436067	0.698280964793161
PF3D7_1452400	0.733724123648903	3.02398279001185	1.44569535202161	0.229219927601009	0.698280964793161
PF3D7_1328600	-0.97334616413836	0.15273423708581	1.44421743604816	0.229458085056615	0.698630055417393
PF3D7_1363500	-1.08302632618956	1.26678604169951	1.44184369346144	0.229841223661987	0.699258240421441
PF3D7_0211800	0.615173891880866	5.58293800736392	1.44080742191198	0.230008726722781	0.699258240421441
PF3D7_1450200	-0.730975920908738	2.10130073591842	1.44000837279983	0.230137985547415	0.699258240421441
PF3D7_0824600	0.655467355150859	3.69749507108625	1.43985024190363	0.230163576092508	0.699258240421441
PF3D7_0602200	-0.632264045377668	4.28337039334654	1.43650700193315	0.230705420850648	0.699258240421441
PF3D7_0313800	0.903638700973928	2.5197948593402	1.43585997831771	0.23081046260291	0.699258240421441
PF3D7_1321500.1	-1.21191443464225	0.931855991357546	1.43523173411564	0.230912510769159	0.699258240421441
PF3D7_1321500.2	-1.21191443464225	0.931855991357546	1.43523173411564	0.230912510769159	0.699258240421441
PF3D7_1015100	-0.890969925551376	1.70770752906801	1.43408127074253	0.231099526103872	0.699258240421441
PF3D7_0318500	-0.910262945052423	0.607288032847194	1.43304320535102	0.231268427187446	0.699258240421441
PF3D7_0823100	0.637452699749694	4.74899476690543	1.43218329534882	0.231408453800018	0.699258240421441
PF3D7_1364800	0.594997749570602	6.89773370507815	1.43212230933085	0.231418388565851	0.699258240421441
PF3D7_0606200	0.640365234110171	4.36941021945694	1.431913165813	0.231452462444776	0.699258240421441
PF3D7_1352100	-0.772294350448651	2.40358266762414	1.43164914691254	0.231495485320512	0.699258240421441
PF3D7_0405600	-0.771301624767061	2.4727980736578	1.43087909049625	0.231621024033991	0.699258240421441
PF3D7_0724900	-1.46073355899412	-0.154527738286779	1.43074308093628	0.231643205572932	0.699258240421441
PF3D7_1441500	0.967627462729143	1.41148054256301	1.42893096436741	0.231938984903084	0.699777492338334
PF3D7_0518000	0.629020404673279	4.66278504246578	1.42164053985181	0.233133566929032	0.702868063058414
PF3D7_0721900	-0.69238910927579	3.13607510789997	1.42116362288337	0.233211971400351	0.702868063058414
PF3D7_0321700	-1.10844662476695	0.717453874426191	1.41790516968107	0.233748509792405	0.70410978922017
PF3D7_0907100	-0.67032711744695	2.86977849567331	1.41392901717294	0.234405247535996	0.705712071122748
PF3D7_0702300	0.650330517160416	3.62444646951532	1.41109849411438	0.234874122557724	0.70674735973463
PF3D7_1243500	-1.10069366801155	1.41386052186968	1.40741070493984	0.235486706931253	0.707053074017418
PF3D7_1106800	0.750699825798109	2.41340868545418	1.40687289198033	0.235576205366635	0.707053074017418
PF3D7_0809200	-0.734066596083618	1.68540649961258	1.4063837998102	0.235657631841484	0.707053074017418
PF3D7_0528400	1.18208792708433	-0.0999881842184424	1.40613577768487	0.23569893680845	0.707053074017418
PF3D7_1444500	-0.929896304645795	1.78336309655025	1.40569682427001	0.235772060468721	0.707053074017418
PF3D7_1213800	0.632859396500516	4.73243029616099	1.40515187588387	0.23586287967144	0.707053074017418
PF3D7_0916200	-0.788714372419324	3.07710589447964	1.40500934141574	0.235886640958886	0.707053074017418
PF3D7_1474400	-0.876659815838451	0.973413342981601	1.4044725700349	0.235976149747235	0.707053074017418
PF3D7_1450700	0.710726805409832	3.36700062623967	1.401580891557	0.236459057148447	0.708124739998579
PF3D7_1208300	-1.29710246424737	3.606647725615	1.39999363098261	0.236724637021637	0.708544784394038
PF3D7_1253200	-0.853463735486027	1.38995824220147	1.39889297019126	0.23690901144633	0.70872145540611
PF3D7_1411500	-0.679196087432015	2.66404007395016	1.39595568466486	0.237401896216646	0.709820370813812
PF3D7_0422000	0.995533468491901	0.938152319419875	1.39300987631288	0.23789746055338	0.710926132118821
PF3D7_1435700.1	-1.06396166061003	2.78464703985534	1.39048964995506	0.238322426891345	0.711441543321416
PF3D7_1435700.2	-1.06396166061003	2.78464703985534	1.39048964995506	0.238322426891345	0.711441543321416
PF3D7_0933600	0.66169714473404	4.19360980063135	1.38974941428486	0.238447422107195	0.711441543321416
PF3D7_1309800	1.31207359990565	1.33092705310823	1.38560528993614	0.239148665199806	0.713157464683388
PF3D7_1430300	0.751101190968238	4.0048635218149	1.38477521382293	0.239289426425596	0.713201063263215
PF3D7_1134600	1.60361098954218	-0.0115318566783236	1.38332670118709	0.23953530093429	0.713557740507101
PF3D7_1316400	-1.18784230669552	0.159262651451569	1.37859306203071	0.240340945464798	0.715580677018414
PF3D7_0825000	-1.04100751973966	2.5657436031675	1.37507264311668	0.240942241821523	0.716993386978363
PF3D7_1407600	-0.804480047298059	1.83113511346737	1.3735654907154	0.241200226490156	0.717383524763461
PF3D7_0830900	0.653548240613831	2.60399974721853	1.37117563953993	0.24160999525257	0.718224454867524
PF3D7_1372500	-0.658067378266752	4.42484658606668	1.37016636253459	0.241783302380361	0.718361950424889
PF3D7_0109000	1.30161368407662	0.756264931179948	1.36780817632155	0.242188826556587	0.7190651828666
PF3D7_1144300	-0.575408736877314	9.33150332457125	1.36731145965427	0.242274349727781	0.7190651828666
PF3D7_1115800	0.654179643023164	3.52178660837336	1.36167273788154	0.243247791796906	0.721575558667213
PF3D7_1024000	-1.05247664577838	2.32296272267662	1.35929813278944	0.243659158331257	0.72241682286572
PF3D7_0214400	0.635109825656711	3.61187127170698	1.35713437585619	0.244034737287868	0.723027360121469
PF3D7_0924400	0.662027040590802	4.01031867689962	1.35663889859848	0.244120840196654	0.723027360121469
PF3D7_0504000	-1.17695516258321	2.7180336157789	1.35242501848303	0.244854618838	0.724518407555853
PF3D7_0809100	0.70812198760728	3.67394203294955	1.35204637108459	0.244920685839678	0.724518407555853
PF3D7_1003800	0.637466978996951	4.53575556198518	1.35154212687272	0.245008700963352	0.724518407555853
PF3D7_0902400	1.29100544534588	0.899607361425761	1.34509197708155	0.246137980095352	0.727380937435784
PF3D7_1131400	1.05714902324372	1.29403146167308	1.34454512574669	0.246234013840129	0.727380937435784
PF3D7_1470500	-1.027365148895	0.425308864464917	1.34327110413926	0.246457925218058	0.727662198006736
PF3D7_0710800	-0.719887667493655	2.1377625955388	1.34078626736768	0.246895355980178	0.727718074411081
PF3D7_0716900	-0.964236444115405	1.47932535976547	1.34041064915868	0.246961562398202	0.727718074411081
PF3D7_1119400	0.772607127933428	2.55977583322833	1.34038151323647	0.246966698799525	0.727718074411081
PF3D7_0628400	-0.985938521137423	0.0232773785511253	1.33974275282159	0.247079339360659	0.727718074411081
PF3D7_1414700	-0.716126655326059	2.22776391055965	1.33951003416345	0.247120393149854	0.727718074411081
PF3D7_0626800	0.571213509730664	8.5644800570015	1.33798057321645	0.247390412366491	0.727737587956583
PF3D7_0618700	-0.894113357061377	1.8882726303237	1.33774020224165	0.247432881558856	0.727737587956583
PF3D7_0829300	0.780228645675146	3.35449669767154	1.33697712820444	0.24756776202615	0.727737587956583
PF3D7_1407700	-1.09837378645032	0.192350532894561	1.33638105874682	0.247673185467035	0.727737587956583
PF3D7_1448600	0.834137651054368	2.33001020590644	1.33583066350691	0.247770579557202	0.727737587956583
PF3D7_0107500	0.611682484697346	5.44702432613981	1.33257893827297	0.248346939734515	0.729051711972454
PF3D7_0732200	-1.1672798216282	1.50746904858455	1.33108890510928	0.248611592809858	0.729449894004639
PF3D7_1461800	-1.01997024151261	0.038931491818016	1.32797190666249	0.249166338376265	0.730403949590051
PF3D7_1227900	0.973416876508343	1.86305505466922	1.32781041065203	0.249195121818042	0.730403949590051
PF3D7_0312500	-0.686648410567692	3.31799817708107	1.32334188491521	0.249993166424362	0.732036161597443
PF3D7_0605600	-1.16529166524784	-0.115185960047415	1.32324143108928	0.250011142696258	0.732036161597443
PF3D7_0610900	-0.615389889870264	4.19614856131463	1.32186693381278	0.25025726912899	0.732036161597443
PF3D7_1435500	-0.702762372807916	2.570411775117	1.32179655398419	0.250269879796225	0.732036161597443
PF3D7_0205400	-0.791598724379169	2.01902479743085	1.32060483208898	0.250483531091434	0.732282256872269
PF3D7_1445400	0.605865046963743	3.98168019968419	1.3171547768392	0.251103318322276	0.733341519322593
PF3D7_1474600	0.59776855747018	4.73847488681086	1.31711447681714	0.251110569158836	0.733341519322593
PF3D7_0831600	0.978550217979483	0.881663566155336	1.31642327905939	0.25123497045063	0.733341519322593
PF3D7_1230600	-0.752404237558134	2.47021363661058	1.31496181720892	0.251498252576399	0.733731228104726
PF3D7_0924600	-1.01661154441148	0.662964885564447	1.31088497901209	0.252234487601163	0.7352785855693
PF3D7_0614300	0.601510358305603	4.81235650906126	1.31058521766268	0.252288725858585	0.7352785855693
PF3D7_1035500	0.786327127706546	2.44156271228656	1.30934519498566	0.252513245589157	0.735553781844974
PF3D7_1402600	-1.03081867119368	0.123689935401046	1.3064941624802	0.253030388654628	0.736680647504257
PF3D7_1102800	0.561887110758446	9.18654836990143	1.30216017732667	0.253819019089666	0.737670468050126
PF3D7_1345100	0.572236051659253	6.31360346686319	1.30209814775906	0.253830328189344	0.737670468050126
PF3D7_1301400	0.565319518423777	6.49569552696276	1.3020450944753	0.253840001243942	0.737670468050126
PF3D7_1353900	0.596270452179052	5.54738737238463	1.3017586206788	0.253892241037415	0.737670468050126
PF3D7_0724400	0.613783065150772	4.07478492553008	1.2999674323148	0.254219172551297	0.738240986956872
PF3D7_0621000	-0.810495850968682	1.16014848736126	1.29732589566312	0.25470225782747	0.739264150799033
PF3D7_1240400	-0.611158302547872	4.8412241301535	1.29483107314508	0.255159550587407	0.739819849178976
PF3D7_0410600	0.654524325287607	3.83947384925499	1.29435272547016	0.255247345678944	0.739819849178976
PF3D7_0204600	-0.911963135994358	2.25531614282505	1.29414075608034	0.255286262070779	0.739819849178976
PF3D7_0824500	-0.892164742500017	3.43100812096594	1.29113953828786	0.255838054444225	0.740766846016361
PF3D7_1209200	0.580242310290099	5.66772944183738	1.29093846668622	0.25587507522427	0.740766846016361
PF3D7_0507100	0.560643120965788	8.10889312867224	1.29022718698893	0.256006087215417	0.740766846016361
PF3D7_0104500	0.75803880928974	2.58581077824142	1.28766677717622	0.25647837952083	0.741655246390862
PF3D7_0624900	0.806103541354887	1.67292587385189	1.28714119059307	0.256575461963305	0.741655246390862
PF3D7_1229000	-0.747096129875208	2.22365995963557	1.28454442657345	0.257055782909175	0.742663973719201
PF3D7_1001500	0.556838883665898	9.69222607987276	1.28364783915191	0.257221881528359	0.742764309581891
PF3D7_1369200	-0.713931907649926	2.6074620832801	1.28144613464093	0.257630324109664	0.74317575404651
PF3D7_1029200	-0.696797880562866	1.99318222181104	1.28082465137662	0.257745761627835	0.74317575404651
PF3D7_1214400	0.686366761799575	2.80900711633844	1.28037861266538	0.257828650548679	0.74317575404651
PF3D7_1119200	1.04203916146781	1.61242407506859	1.27901663099182	0.258081956198937	0.74317575404651
PF3D7_0522000	-0.726695957619753	2.87753222024298	1.2785933929618	0.25816073395549	0.74317575404651
PF3D7_1406800	-0.71986629612211	2.93728569600195	1.27814529456684	0.258244171383538	0.74317575404651
PF3D7_0316200	-1.07304960169478	1.24369749312871	1.27792897085556	0.258284463512804	0.74317575404651
PF3D7_1011800	0.568156375811088	6.6748162816499	1.27671756144663	0.258510242438932	0.74344705531522
PF3D7_0921300	-0.876970807853472	2.05413618108706	1.2746376609647	0.25889845748856	0.744184991682927
PF3D7_0917900	0.557422634699845	7.90006061648708	1.27168339547375	0.259451113480466	0.745394611594795
PF3D7_1468900	-0.733602906270594	2.25493510482223	1.26900389623236	0.2599536314782	0.746459031172038
PF3D7_1462800	0.557370583179145	8.80764840261443	1.26479115687151	0.260746134572916	0.747831782114064
PF3D7_1434600	0.594220236619917	4.48796904962377	1.26436544849028	0.26082638543706	0.747831782114064
PF3D7_1236000	-0.937096827755976	1.37760848623369	1.26435429418325	0.260828488561891	0.747831782114064
PF3D7_0313700.1	0.791395612738539	2.92499728633224	1.26276070585901	0.261129172843902	0.747935330931824
PF3D7_0313700.2	0.791395612738539	2.92499728633224	1.26276070585901	0.261129172843902	0.747935330931824
PF3D7_0925800	-0.862683922546601	2.14070077922249	1.26064476665528	0.26152908034562	0.748701478619815
PF3D7_1033400	0.565809686569827	6.90229141889212	1.25915939544286	0.261810265544116	0.74886835803659
PF3D7_0610500	0.753521360131061	3.17330018373523	1.2583914079299	0.261955794866521	0.74886835803659
PF3D7_1437800	0.734447963926157	2.99752388231214	1.25760431680359	0.262105048316316	0.74886835803659
PF3D7_0321400	0.757406230628247	1.06057900208804	1.25754041598044	0.262117170243086	0.74886835803659
PF3D7_0504700	-1.04121008445474	0.508581952802641	1.25640144496801	0.262333348682215	0.749107351290545
PF3D7_0718500	0.615004392508845	4.97043141224568	1.2549715078649	0.26260506616348	0.749107351290545
PF3D7_1207600	0.957418041612559	2.03496933542918	1.25453222810201	0.262688608464774	0.749107351290545
PF3D7_0320700	0.970940234888382	4.74409943825509	1.25364034620505	0.26285832819947	0.749107351290545
PF3D7_0219000	-0.870739733859218	0.68863771809978	1.25361433523512	0.262863279971779	0.749107351290545
PF3D7_0928900	-0.612185038737784	3.92069225653404	1.25180147899086	0.263208683305211	0.749581329798233
PF3D7_0823000	-0.866496946618333	1.69056013925241	1.25135021167391	0.263294750792234	0.749581329798233
PF3D7_0530300	-0.9168162534588	0.935303717665794	1.24904023804622	0.263735865801271	0.750330382744435
PF3D7_1428400	-0.728174062655084	1.45468953679358	1.24858307080693	0.263823275715588	0.750330382744435
PF3D7_1433300	0.60132945748073	3.85838889462957	1.24664698522314	0.26419385252179	0.751006557143388
PF3D7_1445900	0.56116200586393	6.12422028518678	1.24409815778028	0.264682698186063	0.751784585876764
PF3D7_1122400	0.731266091963692	2.23437965034711	1.24383370497436	0.264733482575281	0.751784585876764
PF3D7_0513200	-0.580270002566577	4.58106138652172	1.24080312286937	0.265316328591371	0.753061506955628
PF3D7_1362300	-0.660119437270141	3.39193011048675	1.23981616406224	0.265506486431352	0.753223118054622
PF3D7_0532400	0.556176176054003	5.75583779607508	1.23822910243764	0.265812622106266	0.753713422963304
PF3D7_0721300	-0.603065554893417	3.573586337266	1.23630334649621	0.266184680291432	0.754222762605429
PF3D7_1223200	-0.626552363924908	3.45679809690818	1.23591884573672	0.266259043891128	0.754222762605429
PF3D7_1244900	0.944464052316517	2.43253438822462	1.23485971990237	0.266464015807543	0.754425410804129
PF3D7_1318800	0.634229636216573	3.97296713266856	1.23313488954537	0.266798241859701	0.75473397807634
[truncated: 3,656 more rows]

## Sheet: 24hpi_all
24hpi all genes down- and up-regulated
genes	logFC	logCPM	LR	PValue	FDR
PF3D7_1241000	-3.06189	10.6517	33.4512	7.30765e-09	4.13175e-05
PF3D7_1103200	-3.98956	0.897842	26.5155	2.61426e-07	0.000739053
PF3D7_1322900	-2.78781	4.61672	22.6933	1.9003e-06	0.00282789
PF3D7_0712100	-2.46636	7.05653	22.5944	2.00063e-06	0.00282789
PF3D7_1213100	-2.41435	15.8305	21.949	2.79993e-06	0.00316616
PF3D7_0308400	-2.32101	10.2306	20.4017	6.27754e-06	0.00520234
PF3D7_1138900	-5.89941	0.0658443	19.9993	7.74694e-06	0.00520234
PF3D7_0601800	-2.30943	5.27218	19.7653	8.75579e-06	0.00520234
PF3D7_0808500	-2.27442	8.10454	19.6092	9.5013e-06	0.00520234
PF3D7_0714700	-3.5259	1.47018	19.295	1.12e-05	0.00520234
PF3D7_0711800	-2.25188	8.46111	19.2669	1.13658e-05	0.00520234
PF3D7_1240500	-2.24497	8.23825	19.1324	1.21956e-05	0.00520234
PF3D7_0412800	-2.22977	10.1829	18.9589	1.33562e-05	0.00520234
PF3D7_0412500	-2.23063	8.33823	18.9304	1.35578e-05	0.00520234
PF3D7_0730600	-5.81083	-0.221025	18.8963	1.38018e-05	0.00520234
PF3D7_0531500	-2.21903	5.78484	18.502	1.6973e-05	0.00592376
PF3D7_0413000	-2.19444	10.1712	18.4101	1.78111e-05	0.00592376
PF3D7_1145600	-5.722	0.0912374	18.1605	2.03042e-05	0.00625018
PF3D7_0421000	-2.19273	6.13286	18.0961	2.10034e-05	0.00625018
PF3D7_1251900	-2.26315	3.37561	17.6951	2.59295e-05	0.00733028
PF3D7_1137000	-2.12581	17.7293	17.3844	3.05324e-05	0.00783659
PF3D7_1341100	-2.12205	12.3822	17.3211	3.1567e-05	0.00783659
PF3D7_0621600	-2.58881	1.67242	17.3024	3.18786e-05	0.00783659
PF3D7_0711600	-2.11327	8.38187	17.1367	3.47834e-05	0.00810839
PF3D7_0420800	-2.12478	6.18361	17.0792	3.58525e-05	0.00810839
PF3D7_0809000	-2.08045	7.45522	16.597	4.62232e-05	0.0100518
PF3D7_1425000	-2.19209	3.29503	16.1868	5.73938e-05	0.0117724
PF3D7_0610400	-2.04378	11.6111	16.1571	5.82999e-05	0.0117724
PF3D7_0515500	-5.39111	-0.0794143	15.9724	6.42733e-05	0.0125311
PF3D7_1362900	-5.29378	0.170638	15.7867	7.08993e-05	0.0133622
PF3D7_1136100	-5.32171	-0.340686	15.2485	9.42502e-05	0.01719
PF3D7_1102000	-5.42129	-0.193601	15.0312	0.000105747	0.0186841
PF3D7_0932200	-1.95591	6.0674	14.6925	0.000126552	0.0216825
PF3D7_1438200	-5.3699	1.11161	14.4717	0.000142285	0.0236611
PF3D7_0215900	-5.15358	-0.24166	14.221	0.00016255	0.0262588
PF3D7_0730700	-2.63555	1.35966	14.1066	0.00017274	0.0271297
PF3D7_0411600	-1.98263	3.34661	13.6747	0.000217361	0.0332152
PF3D7_1035900	-5.09514	0.664621	13.0559	0.000302336	0.0443439
PF3D7_0923700	-5.11624	-0.310959	13.0341	0.000305874	0.0443439
PF3D7_1115100	-2.6416	1.59795	12.5861	0.000388622	0.0549317
PF3D7_1424800	-2.07251	1.96383	12.4496	0.000418091	0.0576557
PF3D7_0725900	-1.7601	11.8105	12.2033	0.000477054	0.0623913
PF3D7_1018500	-1.85845	5.08657	12.1751	0.000484328	0.0623913
PF3D7_0529700	-4.88975	0.213953	12.1246	0.000497608	0.0623913
PF3D7_1370000	-5.06762	-0.0320874	12.1149	0.000500193	0.0623913
PF3D7_0714900	-1.79904	4.43008	12.0875	0.000507605	0.0623913
PF3D7_0527800	-3.26079	0.119829	11.7956	0.00059371	0.0714221
PF3D7_1109600	-4.92647	0.126806	11.6314	0.000648484	0.0762099
PF3D7_0905300	-4.87478	-0.115726	11.5478	0.000678281	0.0762099
PF3D7_0306000	-2.02727	1.91179	11.5212	0.000688078	0.0762099
PF3D7_0925600	-1.94182	1.79019	11.5	0.000695966	0.0762099
PF3D7_0320900	-1.70655	9.97343	11.4835	0.000702163	0.0762099
PF3D7_1030200	-2.18759	2.01576	11.4307	0.000722423	0.0762099
PF3D7_0928000,1	-1.88205	3.68752	11.3402	0.00075849	0.0762099
PF3D7_0928000,2	-1.88205	3.68752	11.3402	0.00075849	0.0762099
PF3D7_0531900	-1.69162	11.633	11.3195	0.000766958	0.0762099
PF3D7_0530800	-2.42157	0.52921	11.3163	0.0007683	0.0762099
PF3D7_1339100	-1.832	2.96954	11.2636	0.000790406	0.0770509
PF3D7_1200200	-3.17103	0.940034	10.968	0.000926966	0.087522
PF3D7_0527700	-2.66773	0.766296	10.9607	0.000930636	0.087522
PF3D7_0912600	-4.85309	-0.0875145	10.9338	0.000944259	0.087522
PF3D7_0311700	-2.79457	0.247219	10.8419	0.000992301	0.0904914
PF3D7_0421400	-1.64219	7.22525	10.6151	0.0011217	0.100668
PF3D7_1235100	-4.73571	-0.591426	10.527	0.00117644	0.103932
PF3D7_1341000	-4.69923	-0.27981	10.2909	0.00133689	0.11605
PF3D7_0304700	-4.59267	-0.380001	10.2388	0.00137519	0.11605
PF3D7_0908100	-4.59267	-0.541328	10.2388	0.00137519	0.11605
PF3D7_0522100	-4.5076	-0.232482	9.95854	0.00160105	0.128613
PF3D7_1134600	-4.5076	-0.0115319	9.95854	0.00160105	0.128613
PF3D7_0214900	-2.74701	0.794531	9.94068	0.00161666	0.128613
PF3D7_1368000	-4.53407	-0.386544	9.93836	0.0016187	0.128613
PF3D7_1437300	-4.56392	0.015128	9.91676	0.0016378	0.128613
PF3D7_0306900	-1.56323	10.8544	9.72724	0.00181557	0.138972
PF3D7_1217400	-4.68048	0.32685	9.72389	0.00181888	0.138972
PF3D7_1479500	2.60053	1.05761	9.61393	0.00193107	0.142936
PF3D7_1109800	-3.36215	0.623107	9.57715	0.00197014	0.142936
PF3D7_0712700	-1.5531	7.9086	9.56132	0.0019872	0.142936
PF3D7_0109500	-1.58442	6.32953	9.52093	0.00203142	0.142936
PF3D7_1248000	-3.35275	-0.133572	9.51966	0.00203282	0.142936
PF3D7_1115000	-1.56966	4.71894	9.51251	0.00204075	0.142936
PF3D7_0208000	-2.91469	-0.00287543	9.48622	0.00207021	0.142936
PF3D7_0631400	2.83691	0.158784	9.48374	0.00207301	0.142936
PF3D7_0307000	-2.57208	1.09643	9.38272	0.00219041	0.148599
PF3D7_1418100	4.23216	-0.197916	9.36831	0.00220769	0.148599
PF3D7_0728600	-1.92361	1.03739	9.34364	0.00223761	0.14884
PF3D7_1340700	-1.58536	3.64865	9.29516	0.0022976	0.151054
PF3D7_0620400	4.19914	-0.443662	9.23569	0.00237343	0.154245
PF3D7_0418600	4.16651	0.146071	9.10622	0.00254741	0.163671
PF3D7_0729700	-4.40276	-0.426327	9.08054	0.00258344	0.164121
PF3D7_1018200	-2.80434	0.221051	8.90941	0.00283705	0.169315
PF3D7_1323700	-1.84012	1.50282	8.90261	0.00284763	0.169315
PF3D7_1441300	-1.96233	1.39522	8.90091	0.00285029	0.169315
PF3D7_1007800	-4.32183	-0.00130485	8.87246	0.00289505	0.169315
PF3D7_1129600	4.10574	-0.274306	8.86634	0.00290477	0.169315
PF3D7_1206000	4.10574	-0.648679	8.86634	0.00290477	0.169315
PF3D7_1218900	4.10574	0.133446	8.86634	0.00290477	0.169315
PF3D7_0100600	4.10574	-0.520918	8.86634	0.00290477	0.169315
PF3D7_1424600	-1.69452	3.14377	8.83732	0.00295132	0.170273
PF3D7_1327000	1.96757	1.91665	8.78186	0.00304241	0.173756
PF3D7_1369800	-1.68877	3.00187	8.62625	0.00331354	0.187347
PF3D7_0817800	-1.56822	2.56407	8.54154	0.00347133	0.188413
PF3D7_0516200	-1.46006	9.41586	8.49828	0.00355482	0.188413
PF3D7_0312000	-1.52225	3.59048	8.49306	0.00356504	0.188413
PF3D7_0529500	-1.47974	7.20564	8.48337	0.00358408	0.188413
PF3D7_1327100	-4.29426	-0.209462	8.46746	0.00361557	0.188413
PF3D7_1457800	-4.29426	-0.321229	8.46746	0.00361557	0.188413
PF3D7_1144000	-1.45337	10.3438	8.45564	0.00363913	0.188413
PF3D7_0928700	-1.76735	1.61322	8.45425	0.00364191	0.188413
PF3D7_1439400	-1.61753	2.2026	8.45255	0.00364531	0.188413
PF3D7_1240800	-1.45314	8.59267	8.43649	0.00367765	0.188413
PF3D7_1463100	-4.37174	-0.243924	8.41957	0.00371203	0.188413
PF3D7_0800200	-2.38653	0.930038	8.39572	0.00376105	0.188413
PF3D7_1306300	-1.97374	1.03726	8.38956	0.00377381	0.188413
PF3D7_1453200	-2.11152	1.34664	8.37751	0.00379892	0.188413
PF3D7_1444300	-1.45737	6.87239	8.3487	0.00385963	0.188887
PF3D7_0717000	-1.6123	1.99427	8.31659	0.00392847	0.188887
PF3D7_1334800	-1.64309	2.16798	8.30201	0.00396013	0.188887
PF3D7_1021900	1.60214	3.01154	8.2893	0.00398794	0.188887
PF3D7_0312600	-1.45611	5.29322	8.2845	0.00399849	0.188887
PF3D7_0903700	-1.44762	6.07858	8.27977	0.00400893	0.188887
PF3D7_1242000	-2.35714	0.420227	8.17868	0.00423856	0.198056
PF3D7_1107400	-1.48035	3.74637	8.14777	0.00431141	0.199809
PF3D7_0207000	-1.46718	3.79247	8.11989	0.00437822	0.201256
PF3D7_1214900	-1.43341	5.81387	8.07719	0.00448259	0.20149
PF3D7_0720600	-1.62041	3.48133	8.07564	0.00448642	0.20149
PF3D7_1108500	-1.4995	2.89634	8.05388	0.00454062	0.20149
PF3D7_0614100	-1.95508	0.805884	8.04031	0.00457477	0.20149
PF3D7_1372000	-2.17102	3.98525	8.03043	0.00459979	0.20149
PF3D7_0727400	-1.42552	6.76348	8.01132	0.00464859	0.20149
PF3D7_1348100	-2.31229	0.175519	8.01005	0.00465184	0.20149
PF3D7_1208200	-2.15511	1.07411	8.00361	0.00466842	0.20149
PF3D7_1140000	-4.25909	-0.515883	7.96953	0.00475714	0.203764
PF3D7_0822900	-4.31247	-0.114738	7.91237	0.00490979	0.208721
PF3D7_0510600	-1.61135	1.87695	7.89304	0.00496254	0.20939
PF3D7_0630200	-4.2493	-0.589211	7.87199	0.00502062	0.209809
PF3D7_1147400	-1.41031	5.34787	7.86263	0.00504669	0.209809
PF3D7_0704500	-4.1742	-0.396244	7.82842	0.00514309	0.212256
PF3D7_1423300	-2.02934	1.32825	7.81184	0.0051905	0.21266
PF3D7_0511100	-2.3965	0.223384	7.79392	0.00524223	0.213234
PF3D7_0506400	-4.10169	-0.142844	7.71222	0.00548482	0.219937
PF3D7_1301300	-4.10169	-0.139638	7.71222	0.00548482	0.219937
PF3D7_1101100	3.86633	0.606541	7.6108	0.00580196	0.225512
PF3D7_1431400	-2.02959	2.26337	7.59618	0.00584921	0.225512
PF3D7_1334600	-2.06622	0.336891	7.59347	0.005858	0.225512
PF3D7_0730900	1.39365	7.06959	7.59284	0.00586004	0.225512
PF3D7_0623300	-1.45239	2.9602	7.59221	0.00586209	0.225512
PF3D7_0731000	3.85888	0.473222	7.58529	0.00588466	0.225512
PF3D7_0714800	-4.2929	-0.609136	7.57967	0.00590303	0.225512
PF3D7_0417700	-4.1483	-0.516624	7.55018	0.00600042	0.226731
PF3D7_0522200	1.48904	2.56207	7.54295	0.00602452	0.226731
PF3D7_1432200	-2.74531	0.125668	7.5302	0.00606733	0.226731
PF3D7_1443200	1.90743	0.975938	7.5219	0.00609535	0.226731
PF3D7_0113300	-1.75993	3.21732	7.4737	0.00626068	0.227916
PF3D7_1029500	-4.18915	-0.317083	7.45192	0.00633689	0.227916
PF3D7_1247000,1	-1.89742	0.529212	7.44887	0.00634762	0.227916
PF3D7_1247000,2	-1.89742	0.529212	7.44887	0.00634762	0.227916
PF3D7_0620900	-1.3875	4.7929	7.44704	0.0063541	0.227916
PF3D7_1014900	-2.6178	0.0259101	7.4428	0.00636908	0.227916
PF3D7_1209500,1	-2.22431	0.287567	7.39644	0.0065353	0.230941
PF3D7_1209500,2	-2.22431	0.287567	7.39644	0.0065353	0.230941
PF3D7_0705900	-1.37217	4.98828	7.35412	0.00669092	0.234972
PF3D7_1218800	2.73529	-0.274647	7.27252	0.00700173	0.244369
PF3D7_0111100	-4.11827	-0.520965	7.236	0.00714562	0.247861
PF3D7_0426000	-1.83959	2.09072	7.21198	0.00724187	0.249668
PF3D7_0504000	1.48647	2.71803	7.19469	0.00731195	0.250556
PF3D7_0620300	-4.03991	-0.406308	7.16035	0.00745327	0.25234
PF3D7_0600500	-4.03991	0.0791613	7.16035	0.00745327	0.25234
PF3D7_1104500	-1.69581	1.02937	7.10937	0.00766819	0.258071
PF3D7_1317200	1.47033	3.27891	7.08494	0.00777342	0.260065
PF3D7_1369400	-1.7647	1.73022	7.05726	0.00789445	0.261536
PF3D7_0313600	-1.84869	1.06839	7.05376	0.00790991	0.261536
PF3D7_1109300	-2.43205	0.190226	7.00579	0.00812464	0.267074
PF3D7_0700100	-1.52748	2.587	6.99229	0.00818616	0.267541
PF3D7_1215300	-1.32151	6.71862	6.96171	0.00832724	0.270372
PF3D7_0813400	1.36639	5.73135	6.93769	0.00843982	0.270372
PF3D7_0103800	-1.72526	1.17095	6.93417	0.00845642	0.270372
PF3D7_1109500	-3.0119	0.351748	6.93198	0.00846678	0.270372
PF3D7_0308800	-1.50675	1.73755	6.92248	0.0085119	0.270372
PF3D7_0522500	-1.33319	4.4569	6.89533	0.00864213	0.272976
PF3D7_0712900	-1.63787	3.03974	6.83554	0.00893619	0.280361
PF3D7_1441700	-1.71938	0.719939	6.82777	0.00897512	0.280361
PF3D7_0207700	-1.7013	0.911049	6.80322	0.00909938	0.282681
PF3D7_1230400	-1.31932	5.11243	6.72124	0.00952715	0.294352
PF3D7_0525000	1.42209	4.05881	6.70293	0.00962545	0.295751
PF3D7_1432700	-1.33323	3.51408	6.6934	0.00967704	0.295751
PF3D7_1431900	-3.02521	-0.0389456	6.66229	0.00984743	0.299341
PF3D7_0412200	2.39197	-0.0106975	6.64872	0.00992269	0.300016
PF3D7_0211600	-2.1542	0.0528679	6.61831	0.0100936	0.30106
PF3D7_1250200	1.45982	3.91164	6.6096	0.0101431	0.30106
PF3D7_1312300	-2.44374	-0.22017	6.58635	0.0102763	0.30106
PF3D7_1233200,1	-1.46742	2.70188	6.57221	0.0103583	0.30106
PF3D7_1233200,2	-1.46742	2.70188	6.57221	0.0103583	0.30106
PF3D7_0831900	1.91101	3.01819	6.55578	0.0104544	0.30106
PF3D7_0718200	3.66259	-0.446421	6.52583	0.0106319	0.30106
PF3D7_1039800	3.66259	-0.458237	6.52583	0.0106319	0.30106
PF3D7_1121000	1.54247	1.20652	6.52518	0.0106358	0.30106
PF3D7_1314100	1.57919	1.83638	6.52406	0.0106425	0.30106
PF3D7_1231200	-3.83199	-0.428331	6.46325	0.0110128	0.30106
PF3D7_1002300	-3.83199	-0.290143	6.46325	0.0110128	0.30106
PF3D7_1250400	-3.83199	-0.632249	6.46325	0.0110128	0.30106
PF3D7_0819400	-3.83199	-0.531138	6.46325	0.0110128	0.30106
PF3D7_0207600	-1.32911	3.38683	6.4602	0.0110317	0.30106
PF3D7_0811700	-3.95591	-0.318025	6.45729	0.0110498	0.30106
PF3D7_0606300	-3.95591	0.41424	6.45729	0.0110498	0.30106
PF3D7_0206400	1.51315	3.30961	6.43205	0.0112079	0.30106
PF3D7_1123100	1.44896	3.6091	6.4261	0.0112456	0.30106
PF3D7_1310200	3.62717	-0.545815	6.42446	0.0112559	0.30106
PF3D7_0104100	3.62717	-0.510661	6.42446	0.0112559	0.30106
PF3D7_0906200	2.59854	-0.175936	6.42308	0.0112647	0.30106
PF3D7_1303600	1.58106	1.65023	6.40121	0.0114043	0.30106
PF3D7_1025200	1.54789	1.16709	6.39912	0.0114177	0.30106
PF3D7_0906100	-1.27547	4.76285	6.38286	0.0115228	0.30106
PF3D7_0511400	3.61114	-0.498966	6.37795	0.0115547	0.30106
PF3D7_0801300	3.61114	-0.484263	6.37795	0.0115547	0.30106
PF3D7_1213400	3.61114	-0.65644	6.37795	0.0115547	0.30106
PF3D7_1300600	3.61114	-0.194328	6.37795	0.0115547	0.30106
PF3D7_1469500	3.61114	0.173806	6.37795	0.0115547	0.30106
PF3D7_0414700	2.08112	0.0828729	6.34029	0.0118026	0.305789
PF3D7_0402600	3.59231	-0.363039	6.32595	0.0118984	0.305789
PF3D7_0832400	3.59231	-0.502929	6.32595	0.0118984	0.305789
PF3D7_1423400	3.5844	-0.312641	6.30326	0.0120516	0.308326
PF3D7_0401300	3.57651	-0.138942	6.28071	0.0122059	0.310245
PF3D7_0730000	1.92401	0.320778	6.27629	0.0122364	0.310245
PF3D7_0609600	-3.89913	-0.352178	6.24861	0.0124291	0.311784
PF3D7_1254100	3.56081	-0.645377	6.23603	0.0125177	0.311784
PF3D7_0833100	3.56081	-0.72852	6.23603	0.0125177	0.311784
PF3D7_1219500	3.56081	-0.756736	6.23603	0.0125177	0.311784
PF3D7_0806200	-2.05355	0.225004	6.22239	0.0126145	0.312536
PF3D7_1216800	-1.38914	2.38355	6.21162	0.0126914	0.312536
PF3D7_0532300	1.29179	6.99967	6.20286	0.0127544	0.312536
PF3D7_1440000	-1.7295	0.427717	6.19787	0.0127904	0.312536
PF3D7_0927200	-3.80621	-0.012597	6.1932	0.0128242	0.312536
PF3D7_0213600	-2.07458	0.57091	6.17908	0.0129269	0.313687
PF3D7_1121600	-1.23118	11.0992	6.14121	0.0132067	0.319106
PF3D7_0516900	-1.23617	9.05516	6.12376	0.0133377	0.319601
PF3D7_1420800	-3.77731	-0.488397	6.11594	0.0133968	0.319601
PF3D7_1425500	-3.77731	-0.401783	6.11594	0.0133968	0.319601
PF3D7_1004200	1.41531	2.66134	6.10218	0.0135016	0.320747
PF3D7_1139100	1.5459	2.80491	6.08828	0.0136081	0.321737
PF3D7_0219400,1	-1.23474	6.81591	6.07054	0.0137455	0.321737
PF3D7_0219400,2	-1.23474	6.81591	6.07054	0.0137455	0.321737
PF3D7_1308600	-2.44408	-0.0843665	6.06729	0.0137708	0.321737
PF3D7_1346600	-2.46395	-0.218965	6.05951	0.0138316	0.321827
PF3D7_1359000	1.40706	3.48097	6.01366	0.0141955	0.328338
PF3D7_1479000	2.2149	0.155964	6.00968	0.0142276	0.328338
PF3D7_0621100	-2.06844	0.232729	5.98851	0.0143994	0.330951
PF3D7_0915100	-1.22803	6.75149	5.95679	0.0146607	0.334267
PF3D7_0519200	-1.21264	10.0429	5.95665	0.0146619	0.334267
PF3D7_1018300	1.38754	3.16861	5.88881	0.0152374	0.345392
PF3D7_0828800	-3.7746	-0.265905	5.87779	0.0153331	0.345392
PF3D7_1329700	-3.7746	-0.123574	5.87779	0.0153331	0.345392
PF3D7_0817500	-1.21439	6.87302	5.8543	0.015539	0.348641
PF3D7_1114400	-1.53785	0.883279	5.80882	0.015946	0.353539
PF3D7_1215800	-3.8369	-0.540351	5.80113	0.0160159	0.353539
PF3D7_1227300	-3.67073	-0.433694	5.79952	0.0160305	0.353539
PF3D7_0605600	-3.74289	-0.115186	5.79825	0.0160421	0.353539
PF3D7_1109100	-2.44004	0.100008	5.79521	0.0160699	0.353539
PF3D7_1105600	1.23293	5.70268	5.78718	0.0161434	0.353779
PF3D7_0219800	1.88135	1.48887	5.76705	0.0163294	0.356473
PF3D7_1435200	2.1874	-0.392282	5.74274	0.016557	0.357596
PF3D7_1018900	-1.89473	0.674314	5.73338	0.0166454	0.357596
PF3D7_1041200	-3.71203	-0.0327574	5.7212	0.0167613	0.357596
PF3D7_1332200	-3.71203	0.136749	5.7212	0.0167613	0.357596
PF3D7_0901300	-3.71203	-0.169434	5.7212	0.0167613	0.357596
PF3D7_1420500	-3.71203	-0.562179	5.7212	0.0167613	0.357596
PF3D7_1141200	-1.42923	1.6491	5.71469	0.0168236	0.357596
PF3D7_0508700	1.45834	2.41075	5.68241	0.0171358	0.362192
PF3D7_1008700	-1.19266	6.21453	5.67913	0.0171679	0.362192
PF3D7_0922900	-2.03369	0.444144	5.65664	0.0173894	0.36475
PF3D7_0317600	-1.1821	9.51176	5.65096	0.0174458	0.36475
PF3D7_1369900	-2.40311	0.433311	5.6413	0.0175422	0.36475
PF3D7_0405700	1.36178	2.53838	5.6392	0.0175632	0.36475
PF3D7_1318600	-1.58914	0.526673	5.63436	0.0176117	0.36475
PF3D7_0112600	-1.34034	2.38353	5.6244	0.0177122	0.365491
PF3D7_0415200	-1.63283	1.29597	5.60817	0.0178769	0.367549
PF3D7_1362300	-1.31161	3.39193	5.60124	0.0179478	0.367589
PF3D7_1445600	1.26053	4.22971	5.59529	0.0180089	0.367589
PF3D7_0501300	-1.24326	9.08767	5.58682	0.0180961	0.368041
PF3D7_0203600	2.15293	-0.238953	5.56952	0.0182758	0.370363
PF3D7_0722700	-1.24277	3.6169	5.5595	0.0183806	0.371157
PF3D7_1032400	-1.42445	1.36905	5.5296	0.0186974	0.373724
PF3D7_1100800	1.62991	1.04507	5.52221	0.0187765	0.373724
PF3D7_1017500	1.41283	2.08824	5.52145	0.0187847	0.373724
PF3D7_1358200	1.31726	2.87204	5.51656	0.0188372	0.373724
PF3D7_1249000	-1.81197	0.741126	5.51647	0.0188382	0.373724
PF3D7_0413400	-1.98114	0.533278	5.49273	0.0190957	0.376191
PF3D7_1135300	-1.98114	2.2451	5.49273	0.0190957	0.376191
PF3D7_0711300	1.43092	2.53455	5.47826	0.0192544	0.376524
PF3D7_0618600	-1.19498	4.17577	5.47753	0.0192624	0.376524
PF3D7_1347600	-1.50848	1.09824	5.47301	0.0193123	0.376524
PF3D7_0933000	1.41827	2.69412	5.4401	0.0196795	0.381395
PF3D7_1418800	-1.15534	19.6064	5.4337	0.0197518	0.381395
PF3D7_0324100	2.72432	-0.238682	5.42838	0.019812	0.381395
PF3D7_1040300	-3.69961	0.83795	5.42069	0.0198995	0.381395
PF3D7_1340500	-3.69961	0.0956477	5.42069	0.0198995	0.381395
PF3D7_0208400	1.41977	2.33906	5.40185	0.0201154	0.382153
PF3D7_1366500	-1.17224	4.66142	5.40143	0.0201202	0.382153
PF3D7_0528900	-3.59625	0.114324	5.39956	0.0201418	0.382153
PF3D7_1303300	-2.26947	0.411005	5.35344	0.0206814	0.390093
PF3D7_1205300	-2.62747	-0.322955	5.35202	0.0206982	0.390093
PF3D7_1313600	-3.66541	-0.273036	5.34175	0.0208206	0.391096
PF3D7_0514100	-1.31794	2.12784	5.32641	0.0210046	0.393244
PF3D7_0611900	-1.27878	2.74452	5.3124	0.0211742	0.395085
PF3D7_1027400	-1.17546	5.87388	5.30414	0.0212748	0.395085
PF3D7_1035200	-1.26781	3.3882	5.29436	0.0213946	0.395085
PF3D7_0218100	-2.14208	0.0106763	5.28898	0.0214608	0.395085
PF3D7_1030400	-1.71965	1.18639	5.2858	0.0215001	0.395085
PF3D7_0315900	-2.65942	0.00250088	5.28401	0.0215221	0.395085
PF3D7_0611800	1.20038	3.97043	5.27517	0.0216317	0.39541
PF3D7_0801900	-1.77664	1.91401	5.26613	0.0217443	0.39541
PF3D7_1019100	-2.37485	0.22879	5.2657	0.0217497	0.39541
PF3D7_1133600	1.66625	1.09625	5.24657	0.0219901	0.398167
PF3D7_1214500	-1.84045	1.05636	5.24246	0.0220421	0.398167
PF3D7_0824100	1.50233	1.4331	5.22931	0.0222094	0.39991
PF3D7_1148100	-1.52766	1.2569	5.19485	0.022654	0.406005
PF3D7_0620800	-1.20016	2.98643	5.19113	0.0227024	0.406005
PF3D7_0617800	-1.12811	11.9849	5.18573	0.0227731	0.406005
PF3D7_1115900	-1.57266	1.93523	5.17985	0.0228503	0.406005
PF3D7_0618300	-1.13106	8.99674	5.17555	0.0229069	0.406005
PF3D7_0732200	-1.60266	1.50747	5.15854	0.0231323	0.407748
PF3D7_0925200	-1.442	2.4352	5.15725	0.0231495	0.407748
PF3D7_0809800	-1.42071	1.76166	5.12702	0.0235561	0.408625
PF3D7_0931400	-1.18927	3.87298	5.12123	0.0236348	0.408625
PF3D7_1335900	-1.79846	0.391021	5.1132	0.0237444	0.408625
PF3D7_1131300	-3.48498	-0.413719	5.10553	0.0238497	0.408625
PF3D7_1476100	-3.48498	-0.160641	5.10553	0.0238497	0.408625
PF3D7_1314800	-3.48498	-0.526311	5.10553	0.0238497	0.408625
PF3D7_0315600	-3.48498	-0.579785	5.10553	0.0238497	0.408625
PF3D7_1430500	-3.48498	-0.33632	5.10553	0.0238497	0.408625
PF3D7_0825800	-3.48498	-0.559175	5.10553	0.0238497	0.408625
PF3D7_1418400	-1.16983	3.41732	5.09058	0.0240562	0.410514
PF3D7_1478100	-1.59071	1.84613	5.08705	0.0241051	0.410514
PF3D7_1209200	-1.1539	5.66773	5.07015	0.0243413	0.41329
PF3D7_1027000	2.17978	0.278059	5.04621	0.0246798	0.416365
PF3D7_1461300	-1.12187	7.42436	5.0428	0.0247284	0.416365
PF3D7_0100200	-2.3756	0.666643	5.04176	0.0247433	0.416365
PF3D7_0929500	-2.59173	-0.303583	5.01764	0.0250903	0.419248
PF3D7_0208900	3.27264	-0.456029	5.00665	0.0252501	0.419248
PF3D7_0303900	3.27264	-0.617489	5.00665	0.0252501	0.419248
PF3D7_0902100	3.27264	-0.550446	5.00665	0.0252501	0.419248
PF3D7_1436700	-1.77122	0.221128	5.00193	0.0253191	0.419248
PF3D7_0507600	1.18301	3.67818	4.99916	0.0253596	0.419248
PF3D7_0514400	-3.50488	-0.549086	4.93967	0.0262471	0.430274
PF3D7_1129300	-3.50488	-0.0910614	4.93967	0.0262471	0.430274
PF3D7_0524800	-1.11937	5.15361	4.93738	0.0262818	0.430274
PF3D7_1302900	1.45429	1.07588	4.93237	0.0263581	0.430274
PF3D7_1233000	-1.47943	1.11641	4.92917	0.026407	0.430274
PF3D7_0931700	-2.01831	-0.214831	4.90347	0.0268028	0.431237
PF3D7_0610300	-2.29425	-0.382649	4.89822	0.0268843	0.431237
PF3D7_0607900	1.42472	1.19649	4.88724	0.0270558	0.431237
PF3D7_0304000	-2.58796	-0.290339	4.88628	0.0270709	0.431237
PF3D7_1033800	3.21788	-0.577206	4.88532	0.027086	0.431237
PF3D7_0410500	3.21788	-0.673498	4.88532	0.027086	0.431237
PF3D7_1039900	3.21788	-0.454346	4.88532	0.027086	0.431237
PF3D7_1400400	3.21788	-0.328759	4.88532	0.027086	0.431237
PF3D7_0907000	1.1564	3.72157	4.88109	0.0271525	0.431237
PF3D7_0900300	3.20953	-0.576091	4.86665	0.0273806	0.433642
PF3D7_1354600	1.4552	2.04209	4.85648	0.0275425	0.434513
PF3D7_1002000	3.2012	1.33374	4.84811	0.0276765	0.434513
PF3D7_1219000	1.25375	3.04237	4.84628	0.0277059	0.434513
PF3D7_0619700	-1.61935	0.22412	4.843	0.0277586	0.434513
PF3D7_1146700	2.61704	-0.0351706	4.83214	0.0279339	0.434513
PF3D7_0424400	3.19291	0.0150779	4.82969	0.0279736	0.434513
PF3D7_0924800	3.19291	-0.0150225	4.82969	0.0279736	0.434513
PF3D7_1034400	-1.31085	2.04217	4.79363	0.0285651	0.439826
PF3D7_1220200	-1.67807	0.694461	4.7914	0.0286021	0.439826
PF3D7_0925400	-1.19203	2.93691	4.7792	0.0288055	0.439826
PF3D7_1150400	2.60107	2.4275	4.77819	0.0288224	0.439826
PF3D7_1302200	2.30238	-0.381509	4.77079	0.0289465	0.439826
PF3D7_1311800	1.09019	6.7679	4.76826	0.0289891	0.439826
PF3D7_1136800	1.23241	2.52504	4.76106	0.0291107	0.439826
PF3D7_0506000	-1.32978	2.49535	4.76053	0.0291196	0.439826
PF3D7_1474000	2.59396	-0.264697	4.75372	0.029235	0.439826
PF3D7_0607100	-1.32685	3.0557	4.74824	0.0293283	0.439826
PF3D7_1229000	1.3253	2.22366	4.7451	0.0293819	0.439826
PF3D7_0420200	1.3672	1.11034	4.74219	0.0294315	0.439826
PF3D7_1140300	-2.2069	-0.378631	4.73964	0.0294752	0.439826
PF3D7_0725400	-1.47491	2.24678	4.73444	0.0295645	0.439826
PF3D7_0214500	-3.53123	-0.365717	4.72787	0.0296777	0.439826
PF3D7_0604400	-3.53123	-0.724482	4.72787	0.0296777	0.439826
PF3D7_1425400	1.5985	0.664187	4.72593	0.0297111	0.439826
PF3D7_0616500	2.28937	-0.177894	4.71898	0.0298314	0.439826
PF3D7_1308000	-2.18837	-0.0642369	4.71297	0.0299359	0.439826
PF3D7_1471600	2.57979	-0.568526	4.70519	0.0300718	0.439826
PF3D7_0112800	-3.41142	-0.219145	4.70442	0.0300851	0.439826
PF3D7_1460900,1	-1.3898	0.960948	4.7033	0.0301048	0.439826
PF3D7_1460900,2	-1.3898	0.960948	4.7033	0.0301048	0.439826
PF3D7_0726200	1.15017	4.28789	4.68508	0.0304256	0.442184
PF3D7_1125700	-1.78854	0.396462	4.68307	0.0304612	0.442184
PF3D7_1356100	-1.44278	0.492955	4.67312	0.0306383	0.442184
PF3D7_0803200	-1.45485	1.07556	4.67064	0.0306825	0.442184
PF3D7_1027900	-1.13748	3.05332	4.67034	0.0306879	0.442184
PF3D7_1029900	-1.78907	0.148114	4.66062	0.030862	0.442184
PF3D7_1004500	-1.41972	0.664981	4.6593	0.0308857	0.442184
PF3D7_1252000	-1.36941	1.10675	4.65896	0.0308919	0.442184
PF3D7_1102600	-2.27414	-0.23407	4.65411	0.0309794	0.442316
PF3D7_1331400	-3.38286	-0.44884	4.64468	0.03115	0.443632
PF3D7_1207700	-1.57852	0.780381	4.63338	0.0313558	0.445441
PF3D7_1213000	-2.48676	0.480937	4.61958	0.031609	0.446321
PF3D7_0523500	-1.5921	0.131455	4.61426	0.0317071	0.446321
PF3D7_1458200	1.81518	0.799475	4.61293	0.0317318	0.446321
PF3D7_1019600	-1.91307	-0.0344832	4.61284	0.0317334	0.446321
PF3D7_0818400	1.11174	3.99517	4.59726	0.032023	0.449276
PF3D7_1434200	-1.07023	6.28061	4.58844	0.0321883	0.450476
PF3D7_1253200	-1.97078	1.38996	4.57448	0.0324515	0.453039
PF3D7_0111800	1.21068	2.51267	4.53211	0.0332646	0.463247
PF3D7_1210700	-1.38202	0.89765	4.52274	0.0334472	0.464644
PF3D7_0209900	-1.56199	0.750951	4.50451	0.0338056	0.468472
PF3D7_0820600	-1.4329	1.23562	4.49671	0.03396	0.468919
PF3D7_1126200	-1.05117	9.34395	4.4924	0.0340459	0.468919
PF3D7_1105000	-1.04811	11.2076	4.49035	0.0340866	0.468919
PF3D7_0106900	-1.79253	-0.0134082	4.45731	0.0347522	0.476815
PF3D7_0818200	-1.04454	10.0184	4.45353	0.0348293	0.476815
PF3D7_0604500	1.09087	4.98065	4.4358	0.0351926	0.479313
PF3D7_1339700	1.60722	0.18382	4.43272	0.0352563	0.479313
PF3D7_0507200	2.50735	0.598369	4.43225	0.0352661	0.479313
PF3D7_0612200	-1.33626	1.51862	4.42764	0.0353615	0.479339
PF3D7_1372600	-1.08453	5.12613	4.42395	0.0354379	0.479339
PF3D7_1143000	-2.06184	-0.222112	4.41989	0.0355223	0.479339
PF3D7_1314000	-1.48754	0.788083	4.40732	0.0357851	0.481549
PF3D7_0628100	1.52184	1.46647	4.40282	0.0358795	0.481549
PF3D7_0927800	-1.11232	2.9771	4.39677	0.036007	0.481549
PF3D7_1004600	1.72186	-0.00737727	4.39584	0.0360267	0.481549
PF3D7_0932000	-1.228	2.15541	4.38606	0.0362339	0.482233
PF3D7_1452500	1.36424	0.535999	4.37871	0.0363904	0.482233
PF3D7_1207400	-3.2663	-0.41818	4.37737	0.0364191	0.482233
PF3D7_1413300	-3.2663	-0.752655	4.37737	0.0364191	0.482233
PF3D7_1136600	1.14208	3.68182	4.37172	0.0365401	0.482705
PF3D7_0421100	-1.83489	2.47566	4.35825	0.0368301	0.485402
PF3D7_1365100	-1.08156	4.59518	4.3468	0.0370785	0.487509
PF3D7_1022100	1.3097	2.55435	4.34295	0.0371624	0.487509
PF3D7_1118800	-1.8877	-0.242723	4.33766	0.037278	0.487893
PF3D7_0805000	-1.38687	0.832758	4.29644	0.0381921	0.498703
PF3D7_1037900	-1.85262	0.82177	4.29067	0.038322	0.499245
PF3D7_1445200	-1.10517	5.04859	4.27904	0.0385852	0.499457
PF3D7_0111400	1.35394	0.5854	4.27898	0.0385865	0.499457
PF3D7_1245000	-1.57518	0.0733688	4.27824	0.0386033	0.499457
PF3D7_1127900	1.33811	1.74539	4.27216	0.0387417	0.500104
PF3D7_1024200	-1.339	1.43231	4.26104	0.038996	0.501625
PF3D7_1016600	-2.15502	1.68887	4.25586	0.0391152	0.501625
PF3D7_0831800	-1.13612	8.35774	4.25301	0.0391809	0.501625
PF3D7_0207100	-1.20386	1.92604	4.24607	0.0393413	0.501625
PF3D7_1358900	-1.07365	4.80786	4.24418	0.039385	0.501625
PF3D7_0417500	-1.06777	4.03382	4.24389	0.0393919	0.501625
PF3D7_0410800	1.2183	1.99028	4.22843	0.0397522	0.502147
PF3D7_0827700	-3.31534	-0.547804	4.22311	0.0398769	0.502147
PF3D7_1035100	-3.31534	-0.5021	4.22311	0.0398769	0.502147
PF3D7_1218700	-3.31534	-0.379311	4.22311	0.0398769	0.502147
PF3D7_0707100	-3.31534	-0.761409	4.22311	0.0398769	0.502147
PF3D7_1404500	1.22636	2.57832	4.21626	0.0400382	0.502948
PF3D7_0720400	1.22887	2.23523	4.21241	0.0401292	0.502948
PF3D7_1103900	-2.53068	0.223518	4.20911	0.0402074	0.502948
PF3D7_0409500	-1.09349	2.20871	4.20505	0.0403039	0.503042
PF3D7_1139300	1.04877	5.39976	4.19237	0.0406062	0.505699
PF3D7_1422400	1.15083	3.25937	4.18588	0.0407621	0.506525
PF3D7_1008800	1.06553	4.79091	4.18097	0.0408804	0.506881
PF3D7_0908500	-1.40727	1.37367	4.1736	0.0410585	0.507152
PF3D7_0936900	-1.34332	1.59046	4.15212	0.0415825	0.507152
PF3D7_0210900	1.06885	4.07542	4.15071	0.0416171	0.507152
PF3D7_1346400	1.05319	4.74647	4.1417	0.0418391	0.507152
PF3D7_0700500	2.41956	0.0486765	4.13563	0.0419895	0.507152
PF3D7_1464200	1.4722	1.34728	4.13199	0.0420799	0.507152
PF3D7_1127300	1.66502	1.21011	4.12657	0.0422147	0.507152
PF3D7_0406500	-1.07479	5.90084	4.10964	0.0426395	0.507152
PF3D7_1313700	-1.14385	2.04117	4.10789	0.0426836	0.507152
PF3D7_0620600	-3.25298	-0.584992	4.10739	0.0426962	0.507152
PF3D7_1016100	-3.25298	-0.589558	4.10739	0.0426962	0.507152
PF3D7_0600400	-3.25298	0.814082	4.10739	0.0426962	0.507152
PF3D7_0706800	-3.25298	-0.67713	4.10739	0.0426962	0.507152
PF3D7_0825700	-3.25298	-0.763791	4.10739	0.0426962	0.507152
PF3D7_0933700	-3.25298	-0.682802	4.10739	0.0426962	0.507152
PF3D7_1127200	-3.25298	-0.712274	4.10739	0.0426962	0.507152
PF3D7_1355200	-3.25298	0.17606	4.10739	0.0426962	0.507152
PF3D7_1429200	-3.25298	-0.442048	4.10739	0.0426962	0.507152
PF3D7_1453300	-3.25298	-0.638047	4.10739	0.0426962	0.507152
PF3D7_1460000	-3.25298	-0.710679	4.10739	0.0426962	0.507152
PF3D7_1356300	-1.01772	4.96862	4.10344	0.0427961	0.507273
PF3D7_0808100	1.12332	2.7352	4.0998	0.0428883	0.507302
PF3D7_0802100	-1.28057	1.08937	4.09206	0.0430851	0.508566
PF3D7_0207400	-1.23576	0.91989	4.08601	0.0432395	0.509326
PF3D7_0319700	1.06636	4.7023	4.07964	0.043403	0.510188
PF3D7_0508900	-1.64632	1.27048	4.04383	0.0443332	0.520041
PF3D7_0615200	-1.88142	0.0971431	4.032	0.044645	0.522615
PF3D7_0420000	1.06926	4.068	4.0195	0.044977	0.524716
PF3D7_1233800	-1.01629	4.27278	4.01826	0.0450101	0.524716
PF3D7_0501400	-1.17676	7.44588	3.99741	0.0455701	0.528676
PF3D7_1309600	1.29519	1.92421	3.99581	0.0456135	0.528676
PF3D7_1126600	1.13834	2.27001	3.98615	0.0458757	0.528676
PF3D7_0619600	1.86022	0.0165985	3.98432	0.0459256	0.528676
PF3D7_0808900	-2.06281	0.459936	3.98142	0.0460047	0.528676
PF3D7_0911500,1	-1.40393	0.385502	3.97822	0.0460922	0.528676
PF3D7_0911500,2	-1.40393	0.385502	3.97822	0.0460922	0.528676
PF3D7_1143800	1.04757	4.85752	3.97801	0.0460979	0.528676
PF3D7_0731700	1.43722	0.432594	3.97008	0.0463156	0.528967
PF3D7_0408600	-1.97613	-0.47415	3.96717	0.0463957	0.528967
PF3D7_1404100	-0.998257	5.98504	3.96499	0.0464558	0.528967
PF3D7_0730300	0.99118	6.88968	3.96348	0.0464975	0.528967
PF3D7_0513900	-1.28212	1.05152	3.95677	0.0466832	0.530014
PF3D7_0815800	1.08652	3.02131	3.9483	0.0469188	0.531621
PF3D7_1017700	-1.49027	1.00813	3.94335	0.0470571	0.532122
PF3D7_0402800	2.12966	-0.16235	3.93724	0.0472281	0.532989
PF3D7_0708700	-1.04017	3.65526	3.92525	0.047566	0.535734
PF3D7_0531700	-0.978919	8.8362	3.91633	0.0478192	0.536975
PF3D7_0624600	1.00038	5.83557	3.91468	0.0478662	0.536975
PF3D7_1332900	1.04753	4.33213	3.91046	0.0479864	0.537258
PF3D7_0217000	-1.27183	2.00847	3.9025	0.0482142	0.537771
PF3D7_1106200	-1.1457	2.00892	3.90086	0.0482614	0.537771
PF3D7_0623900	-1.07309	2.79166	3.89891	0.0483176	0.537771
PF3D7_0909000	-3.15203	-0.254062	3.89519	0.0484246	0.537903
PF3D7_0204400	1.35145	0.790353	3.88648	0.0486763	0.539639
PF3D7_1251300	-0.995907	4.44484	3.87514	0.0490061	0.542232
PF3D7_0833000	2.07664	-0.0512873	3.86287	0.0493657	0.544135
PF3D7_0800300	-1.38797	2.52696	3.86271	0.0493706	0.544135
PF3D7_0113600	2.39535	0.113109	3.85112	0.0497127	0.545569
PF3D7_0719200	-1.47609	0.901838	3.85	0.049746	0.545569
PF3D7_0321300	-3.12372	-0.144304	3.84526	0.0498867	0.545569
PF3D7_0913800	-3.12372	-0.203787	3.84526	0.0498867	0.545569
PF3D7_1014600	1.01314	4.95127	3.83639	0.0501513	0.54703
PF3D7_0607200	-1.59458	-0.210361	3.83431	0.0502137	0.54703
PF3D7_0203900	-1.11159	1.86208	3.82036	0.0506334	0.550541
PF3D7_0600200	-1.18015	4.61625	3.81311	0.050853	0.551842
PF3D7_1118700	2.0921	0.0919773	3.80873	0.0509862	0.551842
PF3D7_0304800	-2.28083	-0.0129013	3.80505	0.0510982	0.551842
PF3D7_1354400	-0.987049	6.08082	3.80329	0.0511519	0.551842
PF3D7_1310100	-1.96711	-0.170939	3.80038	0.0512411	0.551842
PF3D7_1217000	1.65851	-0.261857	3.79244	0.0514846	0.552853
PF3D7_1023600	-1.16358	1.24102	3.79095	0.0515305	0.552853
PF3D7_0718400	-0.977826	4.94638	3.77726	0.0519537	0.555648
PF3D7_1347300	-1.27478	1.28862	3.77617	0.0519876	0.555648
PF3D7_1428000	-1.2695	0.817487	3.77142	0.0521353	0.556113
PF3D7_1435300	-1.54409	0.657631	3.76846	0.0522278	0.556113
PF3D7_1206700	1.00318	4.47222	3.76048	0.0524774	0.55772
PF3D7_0826800	-1.13433	2.73451	3.74866	0.0528497	0.560624
PF3D7_1356600	1.04716	3.56078	3.74541	0.0529526	0.560663
PF3D7_1372200	-0.979355	10.7727	3.74036	0.053113	0.560803
PF3D7_1020900	-0.958274	7.87976	3.73797	0.0531891	0.560803
PF3D7_1116300	-0.999913	5.45975	3.73564	0.0532634	0.560803
PF3D7_0204000	2.3471	-0.513166	3.71231	0.0540124	0.566584
PF3D7_0722600	1.04109	3.59669	3.7123	0.0540128	0.566584
PF3D7_0719000	1.03749	2.36378	3.69406	0.0546065	0.571269
PF3D7_0808300	-1.06313	3.77505	3.69198	0.0546748	0.571269
PF3D7_1036500	-1.9627	0.606822	3.68538	0.0548914	0.571269
PF3D7_0216400	-1.29198	0.479052	3.68347	0.0549544	0.571269
PF3D7_1339400	-1.10318	1.66254	3.68316	0.0549647	0.571269
PF3D7_1308200	0.983809	5.56692	3.67635	0.0551895	0.572553
PF3D7_0812000	1.25115	0.830208	3.64657	0.0561848	0.573638
PF3D7_0821800	-0.952912	7.08974	3.63515	0.0565715	0.573638
PF3D7_0309600	-0.948739	8.52134	3.63441	0.0565968	0.573638
PF3D7_1327300	1.34024	1.02577	3.63302	0.056644	0.573638
PF3D7_0308300	1.3296	0.690106	3.6218	0.0570272	0.573638
PF3D7_1123900	-0.994775	5.98024	3.62111	0.0570508	0.573638
PF3D7_1224200	1.75505	0.833542	3.61243	0.0573494	0.573638
PF3D7_1230300	-3.00114	-0.379069	3.61024	0.0574247	0.573638
PF3D7_0106600	-3.00114	-0.349011	3.61024	0.0574247	0.573638
PF3D7_0614700	-3.00114	-0.745428	3.61024	0.0574247	0.573638
PF3D7_0831100	-3.00114	0.127827	3.61024	0.0574247	0.573638
PF3D7_0917200	-3.00114	-0.749411	3.61024	0.0574247	0.573638
PF3D7_1146500	-3.00114	-0.668927	3.61024	0.0574247	0.573638
PF3D7_1230100	-3.00114	-0.71865	3.61024	0.0574247	0.573638
PF3D7_1307500	-3.00114	-0.669582	3.61024	0.0574247	0.573638
PF3D7_0209000	-3.00114	0.305028	3.61024	0.0574247	0.573638
PF3D7_0323900	-3.00114	-0.382478	3.61024	0.0574247	0.573638
PF3D7_0532900	-3.00114	-0.437275	3.61024	0.0574247	0.573638
PF3D7_1422900	-3.00114	-0.628192	3.61024	0.0574247	0.573638
PF3D7_1425600	-3.00114	-0.436655	3.61024	0.0574247	0.573638
PF3D7_1454300	-3.00114	0.365837	3.61024	0.0574247	0.573638
PF3D7_1036900	0.975969	4.85129	3.59233	0.0580469	0.576638
PF3D7_1349800	-1.43767	1.65135	3.59119	0.0580868	0.576638
PF3D7_1232300	-1.13023	0.996782	3.58181	0.0584154	0.576638
PF3D7_0603100	-1.38815	0.0595863	3.57219	0.0587547	0.576638
PF3D7_1474400	-1.39997	0.973413	3.56553	0.058991	0.576638
PF3D7_0811000	-1.14537	1.47745	3.55297	0.0594391	0.576638
PF3D7_1448600	1.0474	2.33001	3.55292	0.0594408	0.576638
PF3D7_0721700	-1.72553	0.297754	3.54205	0.0598316	0.576638
PF3D7_0411800	-1.27781	0.712325	3.53889	0.0599456	0.576638
PF3D7_0920500	-1.17893	0.960192	3.53806	0.0599754	0.576638
PF3D7_1219400	-2.04975	2.31286	3.53734	0.0600017	0.576638
PF3D7_0703900	1.06064	3.74659	3.53317	0.0601525	0.576638
PF3D7_1466100	-1.00831	2.75664	3.51099	0.0609628	0.576638
PF3D7_0809200	-1.27352	1.68541	3.48428	0.0619543	0.576638
PF3D7_0322300	1.07773	1.46104	3.48032	0.0621028	0.576638
PF3D7_1239000	1.06111	2.2471	3.4776	0.062205	0.576638
PF3D7_0201700	-1.9071	4.63908	3.47734	0.0622146	0.576638
PF3D7_0627500	-0.924476	7.90353	3.47705	0.0622254	0.576638
PF3D7_0100500	-1.86204	-0.358896	3.47313	0.062373	0.576638
PF3D7_0107800	1.15216	1.11846	3.47282	0.0623849	0.576638
PF3D7_1114100,1	-0.990105	4.75717	3.46748	0.0625867	0.576638
PF3D7_1114100,2	-0.990105	4.75717	3.46748	0.0625867	0.576638
PF3D7_0521600	-3.07927	-0.471978	3.46491	0.062684	0.576638
PF3D7_1341700	-3.07927	-0.781536	3.46491	0.062684	0.576638
PF3D7_1461500	1.99701	-0.499424	3.46473	0.0626908	0.576638
PF3D7_0925900	0.924657	6.37166	3.45828	0.0629356	0.576638
PF3D7_0202300	1.07303	1.88071	3.45828	0.0629357	0.576638
PF3D7_1320300	1.3429	0.345269	3.44472	0.063454	0.576638
PF3D7_1114600	-1.51515	-0.194771	3.43894	0.0636767	0.576638
PF3D7_1005500	0.987252	3.17845	3.43774	0.063723	0.576638
PF3D7_1017200	-1.12909	0.999229	3.43633	0.0637773	0.576638
PF3D7_0202800	-1.29435	0.552937	3.4362	0.0637821	0.576638
PF3D7_1013400	-1.25781	0.731949	3.43389	0.0638714	0.576638
PF3D7_0511800	0.934987	5.54391	3.4311	0.0639795	0.576638
PF3D7_0423500	-0.986356	2.46933	3.43012	0.0640174	0.576638
PF3D7_0222200	2.74763	-0.404424	3.41589	0.0645717	0.576638
PF3D7_0511600	2.74763	-0.529555	3.41589	0.0645717	0.576638
PF3D7_0601400	2.74763	-0.710729	3.41589	0.0645717	0.576638
PF3D7_0829600	2.74763	-0.700427	3.41589	0.0645717	0.576638
PF3D7_0905500	2.74763	-0.496814	3.41589	0.0645717	0.576638
PF3D7_1028900	2.74763	-0.593107	3.41589	0.0645717	0.576638
PF3D7_1036000	2.74763	-0.301194	3.41589	0.0645717	0.576638
PF3D7_1102200	2.74763	-0.620867	3.41589	0.0645717	0.576638
PF3D7_1247700	2.74763	-0.708046	3.41589	0.0645717	0.576638
PF3D7_0114700	2.74763	-0.813064	3.41589	0.0645717	0.576638
PF3D7_0732700	2.74763	-0.813064	3.41589	0.0645717	0.576638
PF3D7_1334400	2.74763	-0.813064	3.41589	0.0645717	0.576638
PF3D7_1338500	2.74763	-0.65238	3.41589	0.0645717	0.576638
PF3D7_0711900	2.74763	-0.760856	3.41589	0.0645717	0.576638
PF3D7_0731900	2.74763	-0.760856	3.41589	0.0645717	0.576638
PF3D7_0932900	2.74763	-0.390584	3.41589	0.0645717	0.576638
PF3D7_0400500	2.74763	-0.520763	3.41589	0.0645717	0.576638
PF3D7_0632000	2.74763	-0.646386	3.41589	0.0645717	0.576638
PF3D7_1219700	2.74763	-0.495298	3.41589	0.0645717	0.576638
PF3D7_1011100	-1.47622	0.933624	3.41478	0.0646151	0.576638
PF3D7_1434000	-1.10642	3.08479	3.41259	0.0647008	0.576638
PF3D7_0511500	0.933683	6.38429	3.40902	0.0648411	0.576638
PF3D7_0510900	0.974389	3.00933	3.39953	0.065215	0.576638
PF3D7_0218900	-1.25839	1.26239	3.3959	0.0653586	0.576638
PF3D7_1246800	0.969854	3.38515	3.38282	0.0658791	0.576638
PF3D7_0111200	-1.25958	0.425118	3.37351	0.0662525	0.576638
PF3D7_1404700	2.71962	-0.570028	3.37255	0.0662912	0.576638
PF3D7_0525700	-0.945798	3.44701	3.36534	0.066582	0.576638
PF3D7_0415800	-1.57493	-0.0474653	3.35936	0.0668242	0.576638
PF3D7_0519300	1.1877	1.21541	3.35762	0.0668946	0.576638
PF3D7_0222600	2.70968	-0.756391	3.35759	0.0668961	0.576638
PF3D7_0702100	2.70968	0.73153	3.35759	0.0668961	0.576638
PF3D7_1131700	2.70968	-0.513961	3.35759	0.0668961	0.576638
PF3D7_0324600	2.70968	-0.459565	3.35759	0.0668961	0.576638
PF3D7_0408700	2.70968	-0.218953	3.35759	0.0668961	0.576638
PF3D7_0419700	2.70968	-0.50739	3.35759	0.0668961	0.576638
PF3D7_0424900	2.70968	0.964078	3.35759	0.0668961	0.576638
PF3D7_0700400	2.70968	-0.814471	3.35759	0.0668961	0.576638
PF3D7_0701500	2.70968	-0.408898	3.35759	0.0668961	0.576638
PF3D7_1149800	2.70968	-0.243482	3.35759	0.0668961	0.576638
PF3D7_1251000	2.70968	-0.00475053	3.35759	0.0668961	0.576638
PF3D7_1350800	2.70968	-0.814471	3.35759	0.0668961	0.576638
PF3D7_0721800	-0.921142	5.8087	3.35318	0.0670752	0.576638
PF3D7_0105000	-1.09304	2.55092	3.35227	0.0671122	0.576638
PF3D7_0423300	-2.16634	0.202024	3.34759	0.0673034	0.576638
PF3D7_1111700	-1.46783	1.01626	3.34633	0.0673551	0.576638
PF3D7_1460800	-1.07786	1.42999	3.33123	0.0679758	0.576638
PF3D7_0827400	2.69203	0.0303921	3.33027	0.0680156	0.576638
PF3D7_1479200	2.69203	-0.353693	3.33027	0.0680156	0.576638
PF3D7_0115500	2.69203	-0.729533	3.33027	0.0680156	0.576638
PF3D7_0701100	2.69203	0.265581	3.33027	0.0680156	0.576638
PF3D7_0714100	2.69203	-0.785789	3.33027	0.0680156	0.576638
PF3D7_0732400	2.69203	-0.0605777	3.33027	0.0680156	0.576638
PF3D7_0826200	2.69203	-0.730436	3.33027	0.0680156	0.576638
PF3D7_1101600	2.69203	-0.329682	3.33027	0.0680156	0.576638
PF3D7_1139000	2.69203	0.132144	3.33027	0.0680156	0.576638
PF3D7_1226100	2.69203	-0.759965	3.33027	0.0680156	0.576638
PF3D7_1241400	2.69203	-0.59228	3.33027	0.0680156	0.576638
PF3D7_1476900	2.69203	-0.443336	3.33027	0.0680156	0.576638
PF3D7_0221900	2.69203	-0.596996	3.33027	0.0680156	0.576638
PF3D7_0805100	2.69203	-0.724852	3.33027	0.0680156	0.576638
PF3D7_1244500	2.69203	-0.272432	3.33027	0.0680156	0.576638
PF3D7_1300800	2.69203	-0.761571	3.33027	0.0680156	0.576638
PF3D7_1322600	2.69203	-0.698291	3.33027	0.0680156	0.576638
PF3D7_1473000	2.69203	-0.757061	3.33027	0.0680156	0.576638
PF3D7_1348000	-2.25341	-0.264291	3.33003	0.0680257	0.576638
PF3D7_1139700	-1.38915	0.363764	3.32471	0.0682463	0.577641
PF3D7_0302700	-1.04064	2.13421	3.32071	0.0684122	0.57818
PF3D7_1124000	-0.927011	5.54264	3.31756	0.0685435	0.578258
PF3D7_1362400	1.06659	2.49741	3.31558	0.0686259	0.578258
PF3D7_1404300	-1.39512	0.239607	3.31183	0.0687828	0.578318
PF3D7_1306600	0.929888	4.15522	3.31043	0.0688415	0.578318
PF3D7_1473200	-0.905202	6.6721	3.3058	0.0690359	0.578318
PF3D7_1013900	-1.1233	2.77686	3.30446	0.0690921	0.578318
PF3D7_1104700,1	-0.902313	6.97627	3.29852	0.0693421	0.578318
PF3D7_1104700,2	-0.902313	6.97627	3.29852	0.0693421	0.578318
PF3D7_1306500	-1.59131	0.38803	3.29836	0.069349	0.578318
PF3D7_0524000	0.905068	6.73453	3.29497	0.0694923	0.578659
PF3D7_1456600	-1.13415	1.3745	3.29057	0.0696787	0.579358
PF3D7_1437100	-1.77124	-0.38087	3.28157	0.0700618	0.581688
PF3D7_1414300	-0.896189	9.19247	3.27865	0.0701865	0.581869
PF3D7_1027300	-0.958461	5.17225	3.27463	0.0703588	0.582443
PF3D7_1310000	-1.35983	0.130593	3.26896	0.0706025	0.583125
PF3D7_0416600	-1.5007	-0.0121965	3.26791	0.0706474	0.583125
PF3D7_0101300	-1.81557	0.55671	3.25444	0.0712303	0.587079
PF3D7_0109000	1.39738	0.756265	3.24499	0.071642	0.588701
PF3D7_0412400	-1.23851	4.50848	3.24385	0.0716922	0.588701
PF3D7_1466000	2.1892	-0.184472	3.24276	0.0717395	0.588701
PF3D7_1125000	-0.925481	3.23113	3.22893	0.072348	0.592689
PF3D7_1349700	-0.938204	2.84787	3.22467	0.0725365	0.592689
PF3D7_0613400	-0.896386	5.22784	3.22459	0.07254	0.592689
PF3D7_0630400	-2.93286	-0.704837	3.21443	0.0729918	0.593807
PF3D7_0732500	-2.93286	-0.523776	3.21443	0.0729918	0.593807
PF3D7_1214800	-2.93286	-0.711169	3.21443	0.0729918	0.593807
PF3D7_0931200	-1.12302	2.74924	3.21051	0.0731666	0.594373
PF3D7_1302700	1.01293	3.67978	3.20719	0.0733155	0.594423
PF3D7_0612800	1.0557	2.53355	3.20517	0.073406	0.594423
PF3D7_0725700	-0.884522	8.81826	3.20334	0.0734881	0.594423
PF3D7_1032600	-1.6987	-0.129731	3.19762	0.0737455	0.595653
PF3D7_1406300	-0.932931	3.17278	3.19358	0.0739281	0.596276
PF3D7_0706700	-1.0788	1.91822	3.18729	0.0742128	0.597365
PF3D7_1467200	-1.27083	1.31894	3.18539	0.0742993	0.597365
PF3D7_0627100	0.928906	4.88415	3.18361	0.0743801	0.597365
PF3D7_0617500	1.95575	0.256532	3.1762	0.0747185	0.598539
PF3D7_0913400	0.956608	2.5619	3.17577	0.0747379	0.598539
PF3D7_1404400	-1.2536	1.2566	3.17276	0.0748758	0.598795
PF3D7_0821600	0.945436	3.8917	3.1674	0.0751218	0.59917
PF3D7_0320400	1.75548	-0.375795	3.16712	0.0751347	0.59917
PF3D7_0504900	-0.921802	2.766	3.14858	0.075993	0.603407
PF3D7_0416300	1.08771	1.44848	3.14815	0.0760131	0.603407
PF3D7_1210900	-1.1853	0.616968	3.1454	0.0761413	0.603407
PF3D7_0409000	-1.73356	-0.136283	3.1437	0.0762209	0.603407
PF3D7_1359600	0.911251	4.29547	3.14285	0.0762602	0.603407
PF3D7_0113200	0.919899	3.99306	3.13435	0.0766589	0.603407
PF3D7_0618000	1.94131	-0.309788	3.13218	0.0767611	0.603407
PF3D7_0902900	1.94131	-0.41178	3.13218	0.0767611	0.603407
PF3D7_1477300	1.94131	-0.599541	3.13218	0.0767611	0.603407
PF3D7_1433700	-1.1305	1.21746	3.12775	0.0769698	0.603407
PF3D7_1415700	-1.64289	0.8396	3.1244	0.077128	0.603407
PF3D7_0812600	-0.917085	4.78109	3.12332	0.0771795	0.603407
PF3D7_1209800	-1.42637	0.00465169	3.12246	0.0772201	0.603407
PF3D7_1438500	1.05899	2.14458	3.12215	0.0772346	0.603407
PF3D7_1211300	-1.23336	0.923835	3.1209	0.0772942	0.603407
PF3D7_1251200	-1.87146	0.978442	3.11837	0.0774143	0.603407
PF3D7_0414900	-1.34448	1.34306	3.11571	0.0775409	0.603407
PF3D7_0512900	-2.12391	-0.0834222	3.11361	0.0776405	0.603407
PF3D7_1032300	-1.32191	0.451067	3.1125	0.0776937	0.603407
PF3D7_1001200	0.879652	4.4802	3.107	0.0779563	0.604616
PF3D7_1424200	-1.01132	2.72395	3.09915	0.0783332	0.606706
PF3D7_1328900	1.21071	0.891506	3.09599	0.0784852	0.607052
PF3D7_0412700	-0.89641	8.91721	3.09205	0.0786754	0.607284
PF3D7_1407700	1.92693	0.192351	3.08871	0.0788373	0.607284
PF3D7_0515400	1.92693	-0.112468	3.08871	0.0788373	0.607284
PF3D7_1107300	0.884149	6.02186	3.0841	0.0790608	0.607723
PF3D7_1432000	-1.0977	1.29988	3.07544	0.0794833	0.607723
PF3D7_1310800	0.941136	3.6007	3.07523	0.0794936	0.607723
PF3D7_1007000	0.918649	3.19037	3.07439	0.0795347	0.607723
PF3D7_0817900	-0.867672	7.18244	3.07189	0.0796568	0.607723
PF3D7_0400100	-0.994202	3.00642	3.07124	0.0796885	0.607723
PF3D7_1135000,1	-1.54197	-0.0532277	3.05983	0.0802503	0.607723
PF3D7_1135000,2	-1.54197	-0.0532277	3.05983	0.0802503	0.607723
PF3D7_1135000,3	-1.54197	-0.0532277	3.05983	0.0802503	0.607723
PF3D7_0709600	-1.02692	2.634	3.058	0.0803406	0.607723
PF3D7_1340000	-1.75996	0.0379053	3.05747	0.0803668	0.607723
PF3D7_1408100	0.873662	6.36152	3.0542	0.0805287	0.607723
PF3D7_1144100	-0.883313	4.42667	3.04589	0.0809416	0.607723
PF3D7_1303700	-1.50145	-0.14573	3.04583	0.0809448	0.607723
PF3D7_1028200	-0.922596	2.41003	3.0401	0.0812308	0.607723
PF3D7_1020600	-1.15401	1.69174	3.03992	0.0812399	0.607723
PF3D7_1455200,1	-0.943248	2.52152	3.03936	0.0812679	0.607723
PF3D7_1455200,2	-0.943248	2.52152	3.03936	0.0812679	0.607723
PF3D7_1400700	1.90921	-0.230057	3.03767	0.0813526	0.607723
PF3D7_1030000	-0.891254	5.5775	3.03689	0.0813917	0.607723
PF3D7_1438300	-1.46987	0.334187	3.0345	0.0815114	0.607723
PF3D7_1145700	-2.82301	-0.630571	3.0328	0.0815969	0.607723
PF3D7_1449600	-2.82301	-0.548039	3.0328	0.0815969	0.607723
PF3D7_1339800	-2.82301	-0.707059	3.0328	0.0815969	0.607723
PF3D7_1450900	-1.016	1.62391	3.03242	0.0816161	0.607723
PF3D7_0904300	-1.59159	0.15203	3.03097	0.081689	0.607723
PF3D7_1451200	0.882676	5.85605	3.02359	0.0820614	0.608256
PF3D7_1142900	-1.69595	-0.333274	3.02316	0.0820834	0.608256
PF3D7_0217500	-1.69595	0.616482	3.02316	0.0820834	0.608256
PF3D7_1003400	1.60945	0.105625	3.0198	0.0822538	0.608722
PF3D7_0809700	1.90209	-0.437367	3.01648	0.082422	0.609169
PF3D7_0402400	0.889058	4.24914	3.00698	0.0829068	0.61145
PF3D7_0724800	-1.00565	1.64942	2.99753	0.0833918	0.61145
PF3D7_1245600	1.89498	-0.573371	2.99543	0.0834998	0.61145
PF3D7_1145200	1.89498	0.356916	2.99543	0.0834998	0.61145
PF3D7_1417400	-2.79503	-0.51862	2.99357	0.0835958	0.61145
PF3D7_1254200	-2.79503	-0.289334	2.99357	0.0835958	0.61145
PF3D7_1306000	-2.79503	-0.609759	2.99357	0.0835958	0.61145
PF3D7_1132500	-2.79503	-0.122074	2.99357	0.0835958	0.61145
PF3D7_0905000	1.5131	-0.264304	2.98927	0.0838177	0.611668
PF3D7_0513100	-0.9178	3.34244	2.9888	0.083842	0.611668
PF3D7_1300100	-1.02953	3.21607	2.98395	0.0840939	0.612715
PF3D7_0207800	-1.33137	0.387361	2.97559	0.0845293	0.615094
PF3D7_1131000	-0.928213	2.79024	2.97132	0.0847527	0.615928
PF3D7_1117500	1.33634	0.506278	2.9646	0.0851055	0.617698
PF3D7_1403700	-1.05276	1.14577	2.96177	0.0852545	0.617986
PF3D7_0720900	-0.918044	2.84201	2.95435	0.0856468	0.619645
PF3D7_0219000	-1.43394	0.688638	2.9533	0.0857026	0.619645
PF3D7_0106200	1.18129	0.313769	2.95052	0.0858499	0.619917
PF3D7_1242300	-0.888762	3.41624	2.94676	0.0860497	0.620568
PF3D7_1204700	-0.895492	3.33812	2.94077	0.0863695	0.622081
PF3D7_0500100	-0.895721	4.13581	2.93228	0.0868249	0.624129
PF3D7_0909500	-1.31838	0.423104	2.93126	0.0868794	0.624129
PF3D7_0812200	-0.991626	1.5102	2.9293	0.086985	0.624129
PF3D7_1005600	1.0764	2.2546	2.92551	0.0871898	0.624805
PF3D7_0718700	-1.18476	0.323688	2.9192	0.0875311	0.625734
PF3D7_0900100	-1.00714	2.36416	2.91902	0.0875408	0.625734
PF3D7_0417300	0.902835	3.3899	2.90984	0.0880407	0.628513
PF3D7_0924100	-0.967947	2.53884	2.90724	0.0881827	0.628733
PF3D7_0309700	-1.21971	0.936497	2.90139	0.088503	0.630221
PF3D7_1434500	0.887677	4.89375	2.89523	0.088842	0.631597
PF3D7_1422300	1.12679	1.32032	2.89383	0.0889195	0.631597
PF3D7_1473900	1.1661	2.55874	2.89073	0.0890905	0.632017
PF3D7_0902000	0.921266	3.13989	2.88083	0.0896397	0.63446
PF3D7_1016200	-1.32455	1.28805	2.87876	0.0897553	0.63446
PF3D7_1117600,1	-0.919217	2.42799	2.87469	0.0899823	0.63446
PF3D7_1117600,2	-0.919217	2.42799	2.87469	0.0899823	0.63446
PF3D7_0918900	0.867406	4.62675	2.87259	0.0900998	0.63446
PF3D7_0600300	-1.12459	0.931685	2.87179	0.0901448	0.63446
PF3D7_1409000	1.03271	2.13347	2.87044	0.0902204	0.63446
PF3D7_0907700	0.863933	5.06264	2.86817	0.0903478	0.634567
PF3D7_1452100	-1.43993	0.739617	2.86534	0.0905065	0.634877
PF3D7_1120100	-0.83588	9.1349	2.85979	0.0908194	0.634877
PF3D7_0621300	1.00247	3.21595	2.85968	0.0908254	0.634877
PF3D7_1410500	-0.908879	2.51714	2.8594	0.0908411	0.634877
PF3D7_1429300	-1.29183	1.0206	2.85518	0.0910803	0.635061
PF3D7_0906600	0.844334	6.61157	2.85471	0.0911066	0.635061
PF3D7_0924200	1.15842	1.15906	2.85299	0.0912044	0.635061
PF3D7_0301600	0.913898	4.501	2.84618	0.0915911	0.636494
PF3D7_1207300	1.46685	-0.233273	2.84541	0.0916353	0.636494
PF3D7_0615500	1.06727	0.960932	2.84228	0.0918138	0.636951
PF3D7_0907600	-0.992904	2.65337	2.83606	0.0921697	0.637431
PF3D7_0726600	1.05152	0.924014	2.83557	0.0921981	0.637431
PF3D7_0423100	-0.905262	2.74284	2.83517	0.0922212	0.637431
PF3D7_0205500	-0.854081	5.02132	2.82411	0.0928582	0.640501
PF3D7_0305400	-0.920872	2.3738	2.8197	0.093114	0.640501
PF3D7_0303000	1.01736	2.17862	2.81754	0.0932391	0.640501
PF3D7_0628000	0.899377	2.55128	2.8174	0.0932476	0.640501
PF3D7_1471500	-1.33798	0.435427	2.81735	0.0932505	0.640501
PF3D7_1401500	0.992809	3.44671	2.81272	0.0935199	0.640501
PF3D7_0221700	-1.34629	1.98762	2.81073	0.0936358	0.640501
PF3D7_0714500	1.00506	1.9066	2.81035	0.0936577	0.640501
PF3D7_0617900	-0.825194	8.70101	2.79846	0.0943549	0.640501
PF3D7_0800900	-2.66549	1.06839	2.79811	0.0943756	0.640501
PF3D7_0211400	-2.66549	-0.323696	2.79811	0.0943756	0.640501
PF3D7_1220700	-2.66549	-0.615523	2.79811	0.0943756	0.640501
PF3D7_1114300	-2.66549	-0.0593764	2.79811	0.0943756	0.640501
PF3D7_1215700	-2.66549	-0.579735	2.79811	0.0943756	0.640501
PF3D7_1319300	0.91985	3.99577	2.7972	0.0944288	0.640501
PF3D7_1336700	-0.837973	6.55231	2.79637	0.0944779	0.640501
PF3D7_1331300	-0.846978	4.03638	2.79314	0.0946688	0.641027
PF3D7_0833400	2.09937	0.0241384	2.78363	0.0952319	0.644068
PF3D7_1237800	1.1298	1.31123	2.78084	0.0953983	0.644423
PF3D7_1370300	-0.846278	11.115	2.77168	0.0959457	0.644524
PF3D7_1204600	1.15624	1.42164	2.766	0.0962865	0.644524
PF3D7_1447000	-0.821699	9.14978	2.76589	0.0962928	0.644524
PF3D7_1470000	1.02848	0.894354	2.76527	0.0963302	0.644524
PF3D7_1360800	0.838837	5.16617	2.76517	0.0963367	0.644524
PF3D7_1319100	1.06242	2.62639	2.76289	0.0964736	0.644524
PF3D7_1436000	0.84184	5.36797	2.76108	0.0965829	0.644524
PF3D7_1006200	-0.81944	9.71856	2.75902	0.0967076	0.644524
PF3D7_1304000	-0.891909	2.06055	2.7528	0.0970844	0.644524
PF3D7_1452000	-1.1915	1.3068	2.75171	0.0971506	0.644524
PF3D7_0603700	1.54436	-0.403811	2.74958	0.0972801	0.644524
PF3D7_0808200	1.43084	0.735854	2.74938	0.0972919	0.644524
PF3D7_1023100	1.3584	0.128484	2.74907	0.0973108	0.644524
PF3D7_0206500	0.906003	3.51024	2.74831	0.0973575	0.644524
PF3D7_1428200	1.03932	2.57719	2.74777	0.0973901	0.644524
PF3D7_0409800	1.00772	2.98689	2.74707	0.0974331	0.644524
PF3D7_0921000,1	-0.830666	5.62891	2.74468	0.0975784	0.644524
PF3D7_0921000,2	-0.830666	5.62891	2.74468	0.0975784	0.644524
PF3D7_1409400	-0.985986	1.66383	2.74467	0.0975791	0.644524
PF3D7_1021300	-0.922349	1.39757	2.74129	0.0977859	0.645136
PF3D7_1031900	-1.02407	1.21699	2.73716	0.0980388	0.64605
PF3D7_1212200	-1.32817	0.308201	2.734	0.0982331	0.646577
PF3D7_1038800	1.26829	2.75619	2.73099	0.098418	0.647041
PF3D7_1209100	1.35304	0.376719	2.72781	0.0986145	0.64731
PF3D7_1132700	-1.07536	2.14625	2.72662	0.0986878	0.64731
PF3D7_1407300	-0.881603	4.51803	2.72006	0.0990942	0.64793
PF3D7_0632500	-0.89128	4.41399	2.71891	0.0991655	0.64793
PF3D7_0804400	1.15364	0.607114	2.7186	0.0991849	0.64793
PF3D7_1232500	-1.17605	0.448673	2.7177	0.0992408	0.64793
PF3D7_1370100	-1.79359	-0.0255988	2.70884	0.0997936	0.648628
PF3D7_1476200	0.842935	5.98935	2.70842	0.0998198	0.648628
PF3D7_1421600	0.896492	2.89846	2.70758	0.0998723	0.648628
PF3D7_1413600	2.06474	-0.650836	2.70433	0.100076	0.648628
PF3D7_1038700	2.06474	0.0849571	2.70433	0.100076	0.648628
PF3D7_1104000	0.884294	3.45286	2.7038	0.100109	0.648628
PF3D7_0828600	-1.2613	0.752081	2.70314	0.100151	0.648628
PF3D7_1403100	-0.971987	1.74497	2.69999	0.100349	0.64917
PF3D7_1342900	0.891882	3.22517	2.69474	0.10068	0.650276
PF3D7_0910700	1.41545	0.0924058	2.69363	0.10075	0.650276
PF3D7_0424500	-1.02504	4.07383	2.68814	0.101098	0.651774
PF3D7_1474900	-0.915428	2.06278	2.67917	0.101669	0.654224
PF3D7_1345300	1.15089	0.107251	2.67794	0.101748	0.654224
PF3D7_1204900	-1.39722	0.16372	2.67414	0.10199	0.654224
PF3D7_1321200	-0.882736	4.42485	2.67219	0.102116	0.654224
PF3D7_1022700	1.33823	0.829505	2.67155	0.102156	0.654224
PF3D7_1115800	-1.16917	3.52179	2.66967	0.102277	0.654224
PF3D7_1242100	2.04903	-0.368686	2.66813	0.102376	0.654224
PF3D7_1021400	-0.829961	5.55522	2.66771	0.102403	0.654224
PF3D7_1219600	0.834393	4.73903	2.65996	0.102903	0.654414
PF3D7_1243900	1.14993	1.15731	2.65859	0.102992	0.654414
PF3D7_1341300	-0.80489	9.82601	2.65774	0.103047	0.654414
PF3D7_0702800	-1.77593	-0.405458	2.65684	0.103105	0.654414
PF3D7_0309300	0.886412	4.5579	2.65596	0.103163	0.654414
PF3D7_1033100	0.818698	6.18449	2.65546	0.103195	0.654414
PF3D7_0816000	0.964013	2.93757	2.6544	0.103264	0.654414
PF3D7_0709800	-1.55362	0.0802331	2.65201	0.103419	0.654414
PF3D7_1456400	-1.3026	0.658751	2.65102	0.103483	0.654414
PF3D7_0717100	-0.911351	2.55777	2.64938	0.10359	0.654414
PF3D7_1143900	-0.902635	2.36307	2.6447	0.103895	0.655608
PF3D7_0411500	-1.81499	-0.218842	2.64052	0.104169	0.656604
PF3D7_0527000	-0.836487	3.66452	2.63238	0.104705	0.65904
PF3D7_1465800	-1.22151	1.24064	2.6311	0.104789	0.65904
PF3D7_0915400	0.818903	5.89804	2.62302	0.105323	0.661086
PF3D7_0313800	0.875349	2.51979	2.62137	0.105433	0.661086
PF3D7_0422900	0.894378	2.12564	2.62089	0.105465	0.661086
PF3D7_0106000	1.05707	0.78796	2.61574	0.105808	0.661619
PF3D7_0217300	0.954805	2.52408	2.61391	0.10593	0.661619
PF3D7_0314200	-1.31937	0.194545	2.61382	0.105936	0.661619
PF3D7_0115700	-0.871163	3.39969	2.6126	0.106018	0.661619
PF3D7_1325900	-1.19111	0.45552	2.60686	0.106403	0.661988
PF3D7_1463600	-1.03829	0.660585	2.60468	0.106549	0.661988
PF3D7_1454700	-0.890774	3.95447	2.60358	0.106623	0.661988
PF3D7_1202300	-1.16585	1.25181	2.60236	0.106705	0.661988
PF3D7_1148900	0.973575	7.01955	2.59867	0.106953	0.661988
PF3D7_0110000	-1.02224	1.56268	2.5984	0.106972	0.661988
PF3D7_1415500	-1.15324	0.248087	2.5955	0.107168	0.661988
PF3D7_1430900	-0.925261	1.49115	2.5912	0.107459	0.661988
PF3D7_1005700	0.999991	1.22985	2.58897	0.10761	0.661988
PF3D7_1448200	-1.92539	0.269995	2.58701	0.107743	0.661988
PF3D7_0605900	-1.08707	1.51097	2.58669	0.107765	0.661988
PF3D7_1203800	-1.06112	1.9366	2.58577	0.107828	0.661988
PF3D7_1206100	1.54383	0.0756229	2.58537	0.107855	0.661988
PF3D7_0804200	-1.27452	0.752822	2.58501	0.10788	0.661988
PF3D7_1007300	-1.10453	1.42825	2.58436	0.107924	0.661988
PF3D7_1464600	0.809719	5.61866	2.58349	0.107983	0.661988
PF3D7_0514500	-1.39547	0.628209	2.58225	0.108068	0.661988
PF3D7_0713300	1.54192	2.58765	2.58023	0.108206	0.662117
PF3D7_1300300	-1.12367	2.18803	2.57424	0.108616	0.663909
PF3D7_1442000	0.925292	1.68956	2.57221	0.108755	0.664042
PF3D7_1229100	0.877774	5.30854	2.56629	0.109164	0.665318
PF3D7_1243000	-1.13958	0.353757	2.56166	0.109483	0.665318
PF3D7_1423500	1.53536	1.21354	2.55914	0.109658	0.665318
PF3D7_0723000	1.19598	0.847107	2.5578	0.109751	0.665318
PF3D7_0219500	-0.90024	1.84672	2.5566	0.109834	0.665318
PF3D7_0907200	0.966731	3.00247	2.55641	0.109848	0.665318
PF3D7_0803100	0.875368	3.45069	2.55499	0.109946	0.665318
PF3D7_0405900	-1.4303	0.167976	2.55431	0.109994	0.665318
PF3D7_0824200	-0.883162	2.26177	2.55246	0.110123	0.665318
PF3D7_1416900	-0.797493	5.65102	2.55016	0.110283	0.665318
PF3D7_0905900	0.823031	4.09463	2.54995	0.110298	0.665318
PF3D7_1300700	2.00342	-0.670169	2.54882	0.110376	0.665318
PF3D7_1244200	0.928487	2.56786	2.5453	0.110623	0.665427
PF3D7_0723300	-0.937022	1.16759	2.5452	0.11063	0.665427
PF3D7_0511700	-1.9519	0.384261	2.54219	0.110841	0.665559
PF3D7_0103600	1.27876	0.912567	2.53995	0.110998	0.665559
PF3D7_0603800	-0.906409	2.14439	2.53832	0.111113	0.665559
PF3D7_1471700	1.52881	-0.559555	2.53818	0.111123	0.665559
PF3D7_1324900	-0.784835	9.43777	2.5317	0.11158	0.667019
PF3D7_1134800	-0.849255	4.54076	2.53072	0.111649	0.667019
PF3D7_0300100	-0.881019	3.08128	2.52972	0.11172	0.667019
PF3D7_0402100	0.939388	4.44829	2.52171	0.112289	0.668032
PF3D7_1017600	0.865473	3.93146	2.51943	0.112451	0.668032
PF3D7_0810600	0.829404	4.58434	2.51877	0.112498	0.668032
PF3D7_0416200	-1.096	2.20446	2.51533	0.112744	0.668032
PF3D7_0613200	-0.866474	1.80777	2.51364	0.112865	0.668032
PF3D7_0811300	0.822653	4.93499	2.51343	0.11288	0.668032
PF3D7_1131200	-0.970224	1.31598	2.51207	0.112978	0.668032
PF3D7_1147800,1	-1.15159	2.63423	2.51133	0.11303	0.668032
PF3D7_1147800,2	-1.15159	2.63423	2.51133	0.11303	0.668032
PF3D7_1022800	-0.86671	1.9196	2.51076	0.113072	0.668032
PF3D7_1020500	1.39252	0.5124	2.49483	0.114221	0.671258
PF3D7_1468300	1.39252	0.378594	2.49483	0.114221	0.671258
PF3D7_1032700	1.39252	0.824727	2.49483	0.114221	0.671258
PF3D7_0507800	0.849653	3.98764	2.49389	0.114289	0.671258
PF3D7_1318400	-0.992229	1.38215	2.49356	0.114313	0.671258
PF3D7_1441000	1.03359	1.54309	2.49332	0.11433	0.671258
PF3D7_1344700	0.981055	2.26835	2.48579	0.114879	0.673242
PF3D7_1452900	1.23813	0.0839225	2.48542	0.114906	0.673242
PF3D7_1351600	-1.66465	-0.273766	2.4804	0.115273	0.674693
PF3D7_0712300	-0.944649	3.28236	2.47438	0.115715	0.67589
PF3D7_0519700	0.792406	5.14234	2.47334	0.115791	0.67589
PF3D7_0813900	-0.775761	9.327	2.47274	0.115836	0.67589
PF3D7_0314000	-1.14554	1.4276	2.46216	0.116618	0.679753
PF3D7_1236900	0.912865	1.48333	2.45579	0.117092	0.681172
PF3D7_0724700	0.851606	3.99673	2.45526	0.117132	0.681172
PF3D7_0924700	-0.901091	2.87764	2.45403	0.117223	0.681172
PF3D7_0631000	-1.44901	-0.247004	2.45193	0.11738	0.681384
PF3D7_1467100	1.21005	0.797379	2.44763	0.117702	0.681657
PF3D7_0612500	-1.67368	0.740306	2.44669	0.117773	0.681657
PF3D7_1322400	1.95862	-0.157138	2.44473	0.11792	0.681657
PF3D7_0920400	1.0614	1.14378	2.44453	0.117935	0.681657
PF3D7_1310900	-0.838612	3.81114	2.44327	0.11803	0.681657
PF3D7_1325800	0.901057	2.55637	2.44076	0.118219	0.681887
PF3D7_1342800	0.800068	4.48525	2.43954	0.118311	0.681887
PF3D7_1136400	0.864756	3.31624	2.43639	0.118549	0.682561
PF3D7_1106100	0.857164	2.33905	2.43243	0.118848	0.68359
PF3D7_1226700	0.873118	3.46878	2.42912	0.119099	0.684338
PF3D7_0528600	0.841772	2.79694	2.41913	0.119862	0.687916
PF3D7_0701400	1.94254	-0.309955	2.41608	0.120095	0.687916
PF3D7_0318100	0.830843	2.92716	2.41565	0.120128	0.687916
PF3D7_0810500	-0.813681	4.47184	2.4146	0.120209	0.687916
PF3D7_1301600	1.24542	1.67507	2.41252	0.120368	0.688132
PF3D7_1409300	-0.944241	1.15682	2.40669	0.120817	0.690001
PF3D7_1242600	0.875539	2.75469	2.39654	0.121604	0.692364
PF3D7_1035600	1.93315	-0.612017	2.39634	0.12162	0.692364
PF3D7_1401000	-0.969905	0.958779	2.39201	0.121957	0.692364
PF3D7_1020000	-0.786067	4.91521	2.39199	0.121958	0.692364
PF3D7_0308500	-0.77662	5.36584	2.39025	0.122094	0.692364
PF3D7_1231700	-0.835644	2.53844	2.38597	0.122429	0.692364
PF3D7_0719700	-0.772371	7.43059	2.38481	0.122519	0.692364
PF3D7_0801600	-1.27107	-0.163492	2.38394	0.122588	0.692364
PF3D7_1144200	-1.11108	0.772981	2.38236	0.122712	0.692364
PF3D7_0622100	1.92668	0.213442	2.38164	0.122769	0.692364
PF3D7_1462500	-1.1722	0.927152	2.37762	0.123085	0.692364
PF3D7_0616200	-0.814126	2.96	2.37324	0.123431	0.692364
PF3D7_1323400	0.762472	7.6422	2.37254	0.123486	0.692364
PF3D7_0902800	-0.827871	2.36872	2.36796	0.123849	0.692364
PF3D7_1115600	-0.766478	6.95536	2.36715	0.123913	0.692364
PF3D7_0831500	0.920092	3.18078	2.36424	0.124144	0.692364
PF3D7_1033700	0.804461	4.48252	2.36397	0.124166	0.692364
PF3D7_1430200	-0.926911	1.91548	2.36331	0.124219	0.692364
PF3D7_1207900	1.00968	0.803134	2.36215	0.124311	0.692364
PF3D7_1104300	-0.829427	2.46663	2.3613	0.124379	0.692364
PF3D7_1466200	0.908378	2.22236	2.35824	0.124623	0.692364
PF3D7_0422200	0.856794	3.01868	2.35709	0.124715	0.692364
PF3D7_1109700	-0.804137	3.51854	2.35679	0.124739	0.692364
PF3D7_0832300	-1.92546	-0.603978	2.35425	0.124942	0.692364
PF3D7_0509400	0.783368	5.5935	2.35263	0.125072	0.692364
PF3D7_0410400	0.917336	2.62721	2.34764	0.125473	0.692364
PF3D7_1021800	0.860353	2.19152	2.34745	0.125488	0.692364
PF3D7_0821900	-0.793574	3.46493	2.34725	0.125504	0.692364
PF3D7_1240600	-0.869344	5.17824	2.34625	0.125584	0.692364
PF3D7_0717700	0.835253	4.01856	2.34466	0.125713	0.692364
PF3D7_1133300	1.6699	-0.593901	2.33879	0.126188	0.692364
PF3D7_1415600	0.870962	2.29476	2.33827	0.12623	0.692364
PF3D7_1116400	0.878288	2.90594	2.33601	0.126413	0.692364
PF3D7_1234200	0.952964	1.39458	2.33139	0.126788	0.692364
PF3D7_0509200	-1.31637	0.167664	2.33048	0.126863	0.692364
PF3D7_0731300	0.767682	6.44654	2.32926	0.126962	0.692364
PF3D7_1461000	-1.19826	0.53903	2.32333	0.127447	0.692364
PF3D7_0621400	-1.60223	0.309784	2.32288	0.127484	0.692364
PF3D7_1016000	-1.60223	-0.483148	2.32288	0.127484	0.692364
PF3D7_1141100	-1.60905	0.921727	2.3195	0.127761	0.692364
PF3D7_1103300	-0.931515	1.30867	2.31693	0.127972	0.692364
PF3D7_1232700	-1.02033	0.676359	2.31423	0.128195	0.692364
PF3D7_0523700	1.26107	0.158951	2.31326	0.128274	0.692364
PF3D7_0425700	-2.55833	-0.751922	2.31259	0.12833	0.692364
PF3D7_1018100	-2.55833	-0.810007	2.31259	0.12833	0.692364
PF3D7_0401500	-2.55833	-0.267759	2.31259	0.12833	0.692364
PF3D7_0222800	-2.55833	-0.598429	2.31259	0.12833	0.692364
PF3D7_0900400	-2.55833	0.401893	2.31259	0.12833	0.692364
PF3D7_0515700	-0.864456	1.92517	2.31088	0.128471	0.692364
PF3D7_1307900	-1.66052	-0.333158	2.31067	0.128489	0.692364
PF3D7_1026000	0.769632	4.69857	2.30569	0.128901	0.692364
PF3D7_0312400	-0.761309	4.77663	2.30518	0.128943	0.692364
PF3D7_1234700	-1.06053	1.01012	2.30507	0.128952	0.692364
PF3D7_1445800	-1.22177	0.223643	2.30482	0.128973	0.692364
PF3D7_1234900	-0.763313	4.29466	2.30426	0.12902	0.692364
PF3D7_0316500	-0.916566	1.24282	2.30255	0.129161	0.692364
PF3D7_1215600	1.03983	0.260019	2.29766	0.129569	0.692364
PF3D7_1114200	0.771645	5.54799	2.29681	0.12964	0.692364
PF3D7_1404800	0.846357	5.48565	2.29589	0.129716	0.692364
PF3D7_0420300	0.774352	5.39389	2.28784	0.130391	0.692364
PF3D7_0609700	0.846928	4.44257	2.28628	0.130522	0.692364
PF3D7_1441200	0.754316	5.93266	2.28048	0.131011	0.692364
PF3D7_1429900	0.963701	1.23113	2.28022	0.131033	0.692364
PF3D7_0213500	-0.825919	2.91956	2.28012	0.131042	0.692364
PF3D7_0911700	0.899055	1.78382	2.27853	0.131176	0.692364
PF3D7_0818100	-1.50145	-0.114829	2.27653	0.131345	0.692364
PF3D7_0804100	-1.37564	-0.230271	2.27561	0.131424	0.692364
PF3D7_1426300	-1.39552	-0.133288	2.27542	0.131439	0.692364
PF3D7_1319900	-1.58457	-0.433072	2.2732	0.131628	0.692364
PF3D7_0533000	-1.58457	0.210131	2.2732	0.131628	0.692364
PF3D7_1103000	-1.58457	-0.0538141	2.2732	0.131628	0.692364
PF3D7_1336300	-1.58457	-0.50886	2.2732	0.131628	0.692364
PF3D7_1237000	-1.07903	1.41136	2.27217	0.131716	0.692364
PF3D7_1249600	-0.915949	1.5579	2.27111	0.131805	0.692364
PF3D7_1202900	-0.749529	7.39722	2.26837	0.132039	0.692364
PF3D7_0417600	1.87463	-0.382461	2.26646	0.132201	0.692364
PF3D7_1252900	1.32433	0.22008	2.26594	0.132246	0.692364
PF3D7_1448100	1.02422	1.24273	2.26579	0.132258	0.692364
PF3D7_0406400	-0.778229	5.31853	2.26225	0.132561	0.692364
PF3D7_0602100	0.84172	3.73431	2.26162	0.132616	0.692364
PF3D7_0526600	0.809484	3.10019	2.26138	0.132636	0.692364
PF3D7_1359400	0.794165	4.69102	2.26054	0.132708	0.692364
PF3D7_1216500	-1.24068	0.289312	2.26006	0.132749	0.692364
PF3D7_1332400	0.977564	1.58867	2.25791	0.132933	0.692364
PF3D7_0206300	1.13164	1.57997	2.25754	0.132966	0.692364
PF3D7_1011500	-1.03217	1.78046	2.25752	0.132967	0.692364
PF3D7_1358400	-1.42218	0.0635642	2.24787	0.133798	0.692364
PF3D7_1351500	-1.0336	1.26376	2.24738	0.133841	0.692364
PF3D7_0421200	-2.49661	-0.757225	2.2471	0.133865	0.692364
PF3D7_1040900	-2.49661	-0.698411	2.2471	0.133865	0.692364
PF3D7_1100400	-2.49661	-0.457512	2.2471	0.133865	0.692364
PF3D7_1253500	-2.49661	-0.812396	2.2471	0.133865	0.692364
PF3D7_1254700	-2.49661	-0.276696	2.2471	0.133865	0.692364
PF3D7_1351300	-2.49661	-0.698884	2.2471	0.133865	0.692364
PF3D7_1477100	-2.49661	-0.726011	2.2471	0.133865	0.692364
PF3D7_0832000	-2.49661	-0.537782	2.2471	0.133865	0.692364
PF3D7_0832800	-2.49661	-0.641296	2.2471	0.133865	0.692364
PF3D7_1009100	-2.49661	-0.100832	2.2471	0.133865	0.692364
PF3D7_1150300	-2.49661	-0.5123	2.2471	0.133865	0.692364
PF3D7_0502500	-2.49661	-0.582325	2.2471	0.133865	0.692364
PF3D7_0800500	-2.49661	-0.639075	2.2471	0.133865	0.692364
PF3D7_1210500	-2.49661	-0.356199	2.2471	0.133865	0.692364
PF3D7_1122300	-2.49661	1.33013	2.2471	0.133865	0.692364
PF3D7_0708400	-0.737522	10.6567	2.24593	0.133967	0.692364
PF3D7_0606500	-0.887373	3.60865	2.24374	0.134156	0.692712
PF3D7_1231800	0.799262	5.01146	2.24053	0.134435	0.693518
PF3D7_0935500	-0.823785	3.19622	2.23898	0.13457	0.693581
PF3D7_1029300	-0.902164	1.66127	2.22688	0.135628	0.697327
PF3D7_1006900	-0.764069	4.89908	2.22618	0.135689	0.697327
PF3D7_0923800,1	-0.769517	3.41231	2.22503	0.13579	0.697327
PF3D7_0923800,2	-0.769517	3.41231	2.22503	0.13579	0.697327
PF3D7_0107500	0.771631	5.44702	2.2159	0.136595	0.699532
PF3D7_0525500	1.23517	1.23395	2.21539	0.136641	0.699532
PF3D7_1110700	-0.786737	2.39362	2.21537	0.136642	0.699532
PF3D7_0312800	-0.745998	7.71427	2.21456	0.136714	0.699532
PF3D7_0914300	0.83179	3.01325	2.20892	0.137215	0.700015
PF3D7_1421700	-1.39868	0.249448	2.20892	0.137215	0.700015
PF3D7_1209000	-0.767909	4.25478	2.20882	0.137224	0.700015
PF3D7_0206600	-0.807223	3.57171	2.20792	0.137304	0.700015
PF3D7_0928300	-0.81169	2.74448	2.20615	0.137461	0.700185
PF3D7_0925000	1.01053	0.7298	2.20336	0.13771	0.700822
PF3D7_0417400	0.79332	4.69807	2.19267	0.138669	0.703689
PF3D7_0936600	0.805877	6.68485	2.19203	0.138726	0.703689
PF3D7_1356700	0.835159	2.59436	2.1901	0.138901	0.703689
PF3D7_0320000	-0.733063	5.87914	2.18941	0.138963	0.703689
PF3D7_0319500	-0.79276	4.02615	2.18927	0.138975	0.703689
PF3D7_1252200	1.60913	-0.160301	2.1854	0.139325	0.703689
PF3D7_0524200	1.60913	-0.569389	2.1854	0.139325	0.703689
PF3D7_0105300	-0.930976	0.839917	2.18276	0.139564	0.703689
PF3D7_0511300	0.836162	1.78997	2.18088	0.139735	0.703689
PF3D7_1012900	0.750798	4.87721	2.18048	0.139771	0.703689
PF3D7_1328000	1.0367	0.279571	2.17962	0.139849	0.703689
PF3D7_1318500	-1.30358	0.327669	2.17855	0.139946	0.703689
PF3D7_0930900	-1.23971	0.00849919	2.17551	0.140223	0.703689
PF3D7_0729300	0.890785	2.84324	2.17447	0.140318	0.703689
PF3D7_1107000	-0.758522	4.74209	2.17412	0.14035	0.703689
PF3D7_1208000	0.952146	0.993827	2.16866	0.140849	0.703689
PF3D7_1031000	-1.54662	-0.229273	2.16715	0.140988	0.703689
PF3D7_1228000	-0.912129	1.23789	2.16537	0.14115	0.703689
PF3D7_0924600	-1.19593	0.662965	2.16418	0.14126	0.703689
PF3D7_0109700	1.00481	1.91773	2.16156	0.141501	0.703689
PF3D7_1010000	-0.794595	2.78329	2.1593	0.14171	0.703689
PF3D7_1012800	1.1571	-0.0941013	2.15716	0.141907	0.703689
PF3D7_1426900	-0.76473	2.94311	2.15471	0.142133	0.703689
PF3D7_0530600	0.815352	2.64651	2.15334	0.14226	0.703689
PF3D7_1249500	-0.780102	2.65545	2.15007	0.142563	0.703689
PF3D7_0707200	-0.825911	2.19012	2.14934	0.142632	0.703689
PF3D7_1221100	-1.29812	-0.0950403	2.14464	0.143069	0.703689
PF3D7_1401600	1.01772	4.36562	2.14	0.143502	0.703689
PF3D7_0505000	0.815254	3.88366	2.13674	0.143807	0.703689
PF3D7_0723900	0.867251	3.12772	2.13198	0.144254	0.703689
PF3D7_1143400	-0.722025	7.69846	2.13194	0.144258	0.703689
PF3D7_1427400,1	-0.862694	2.00861	2.13057	0.144387	0.703689
PF3D7_1427400,2	-0.862694	2.00861	2.13057	0.144387	0.703689
PF3D7_0215300	-1.32427	2.74916	2.12949	0.144489	0.703689
PF3D7_1324000	-1.21428	1.36098	2.1286	0.144573	0.703689
PF3D7_1347000	-0.903941	1.10756	2.12628	0.144792	0.703689
PF3D7_1026500	1.51907	-0.57688	2.12538	0.144877	0.703689
PF3D7_0506100	0.769675	2.96219	2.12448	0.144962	0.703689
PF3D7_0934400	-0.771854	3.12694	2.12178	0.145218	0.703689
PF3D7_0218600	0.793051	3.82223	2.11847	0.145532	0.703689
PF3D7_0301900	1.09813	0.0334049	2.10884	0.14645	0.703689
PF3D7_1446600	-0.727738	4.41333	2.10557	0.146763	0.703689
PF3D7_1465100	1.04959	0.270739	2.10536	0.146784	0.703689
PF3D7_1112200	-0.910828	0.908082	2.10491	0.146827	0.703689
PF3D7_1362600	-1.30968	-0.0196281	2.10484	0.146833	0.703689
PF3D7_1313400	-0.887199	1.18289	2.1044	0.146876	0.703689
PF3D7_0720100	0.818697	2.42623	2.10161	0.147144	0.703689
PF3D7_1022200	-1.1757	0.606479	2.10099	0.147204	0.703689
PF3D7_0616000	-0.764938	3.64822	2.09715	0.147574	0.703689
PF3D7_1127100	-0.721394	4.76212	2.09699	0.147589	0.703689
PF3D7_0204100	-0.964213	1.15695	2.092	0.148072	0.703689
PF3D7_1244000	-0.780595	3.70153	2.09095	0.148173	0.703689
PF3D7_0416000	-0.723001	5.94577	2.08728	0.14853	0.703689
PF3D7_1111300	-1.80543	0.389051	2.08543	0.14871	0.703689
PF3D7_0531300	0.937243	0.426732	2.08228	0.149017	0.703689
PF3D7_1421800	-0.98213	0.810488	2.08216	0.149029	0.703689
PF3D7_1242200	0.832106	2.06365	2.08211	0.149034	0.703689
PF3D7_0934300	-0.801659	1.78772	2.08062	0.149179	0.703689
PF3D7_1222600	-2.34843	-0.183675	2.07929	0.14931	0.703689
PF3D7_0311000	-2.34843	-0.678862	2.07929	0.14931	0.703689
PF3D7_0417100	-2.34843	-0.789339	2.07929	0.14931	0.703689
PF3D7_1339200	-2.34843	-0.546768	2.07929	0.14931	0.703689
PF3D7_0425200	-2.34843	-0.234106	2.07929	0.14931	0.703689
PF3D7_0527400	0.891714	2.00611	2.0772	0.149514	0.703689
PF3D7_0918000	-0.746814	2.98414	2.07567	0.149664	0.703689
PF3D7_0621500	-1.03928	0.850456	2.07529	0.149702	0.703689
PF3D7_0625400	0.883236	3.33162	2.07512	0.149718	0.703689
PF3D7_1428600	-0.794962	2.45649	2.07489	0.149741	0.703689
PF3D7_1226900	0.74687	3.31235	2.07465	0.149764	0.703689
PF3D7_0206800	-0.800101	3.59997	2.07387	0.149841	0.703689
PF3D7_0934600	1.37826	0.153278	2.07013	0.150209	0.703689
PF3D7_0709700	-0.801788	3.24589	2.06949	0.150271	0.703689
PF3D7_1131800	0.783113	3.51023	2.06834	0.150385	0.703689
PF3D7_1328200	0.890175	0.903786	2.06626	0.15059	0.703689
PF3D7_0821700	0.711042	6.73475	2.0649	0.150725	0.703689
PF3D7_1452400	0.785676	3.02398	2.06336	0.150877	0.703689
PF3D7_0506900	1.03011	0.79817	2.06217	0.150995	0.703689
PF3D7_1018800	-1.26189	0.271973	2.05752	0.151456	0.703689
PF3D7_1459100	1.04955	0.626573	2.05511	0.151697	0.703689
PF3D7_1248100	0.799967	2.6159	2.05331	0.151876	0.703689
PF3D7_1211700	-0.74753	3.12609	2.05305	0.151901	0.703689
PF3D7_1010700	-0.710882	7.62187	2.0513	0.152077	0.703689
PF3D7_1372400	-0.828487	1.4011	2.05073	0.152133	0.703689
PF3D7_1419900	0.823493	2.80943	2.05063	0.152144	0.703689
PF3D7_0202000	-0.708562	10.3416	2.04679	0.152527	0.703689
PF3D7_1303800	0.752556	3.22546	2.04439	0.152768	0.703689
PF3D7_0204900	0.823163	1.3263	2.04419	0.152788	0.703689
PF3D7_0220300	0.789169	2.99056	2.04245	0.152963	0.703689
PF3D7_0819800	-1.27777	0.468097	2.04194	0.153015	0.703689
PF3D7_0521000	0.791402	2.20364	2.04112	0.153097	0.703689
PF3D7_0726400	-0.809248	3.10374	2.03621	0.153592	0.703689
PF3D7_1356400	0.855962	1.12663	2.03535	0.153679	0.703689
PF3D7_0825500	0.792506	3.18476	2.03445	0.15377	0.703689
PF3D7_1236000	-0.9238	1.37761	2.03175	0.154043	0.703689
PF3D7_0925700	-0.73129	5.91846	2.03149	0.15407	0.703689
PF3D7_1126500	0.79778	3.43637	2.03006	0.154215	0.703689
PF3D7_1103100	-0.704767	8.27862	2.02971	0.15425	0.703689
PF3D7_0721500	-1.30245	0.0424366	2.0284	0.154383	0.703689
PF3D7_0507700	0.750622	3.08303	2.02813	0.154411	0.703689
PF3D7_1001000	0.794563	2.67561	2.02771	0.154453	0.703689
PF3D7_1352500	-0.70903	6.80721	2.02754	0.15447	0.703689
PF3D7_1474500	0.751825	3.60354	2.02533	0.154696	0.703689
PF3D7_1213700	0.71789	5.16733	2.02498	0.154731	0.703689
PF3D7_0607300	-1.46918	-0.451223	2.02486	0.154744	0.703689
PF3D7_0526900	0.729741	4.61915	2.02437	0.154793	0.703689
PF3D7_1323200	-0.704295	7.11407	2.0179	0.155454	0.703689
PF3D7_1011700	0.747066	3.33692	2.01501	0.15575	0.703689
PF3D7_1467800	-0.729825	3.28364	2.01458	0.155795	0.703689
PF3D7_1476700	0.985595	0.374612	2.01456	0.155796	0.703689
PF3D7_0904500	0.807299	1.69597	2.01266	0.155991	0.703689
PF3D7_1469600	-1.14625	0.323316	2.01262	0.155996	0.703689
PF3D7_1441100	-0.712835	6.32384	2.01155	0.156106	0.703689
PF3D7_1100200	-0.85177	3.33942	2.01112	0.15615	0.703689
PF3D7_1438400	0.791673	2.50356	2.01049	0.156215	0.703689
PF3D7_0716200	0.734513	5.49072	2.01015	0.15625	0.703689
PF3D7_1456200	-1.23297	0.0745647	2.00969	0.156297	0.703689
PF3D7_0105600	0.819315	3.23759	2.00828	0.156443	0.703689
PF3D7_1318300	0.789991	2.64922	2.00532	0.156748	0.703689
PF3D7_0625700	-1.01414	0.435655	2.00142	0.157152	0.703689
PF3D7_1138500	0.717509	4.96834	1.99919	0.157384	0.703689
PF3D7_1325400	-0.990351	0.600819	1.99888	0.157416	0.703689
PF3D7_1234100	0.758783	3.84849	1.99471	0.15785	0.703689
PF3D7_0801000	0.705651	7.01273	1.99247	0.158083	0.703689
PF3D7_0211100	-1.27322	-0.13893	1.9918	0.158153	0.703689
PF3D7_0604600	-0.903672	0.883417	1.99171	0.158162	0.703689
PF3D7_1022900	-0.735225	3.16691	1.98931	0.158413	0.703689
PF3D7_1324400	0.739037	5.26373	1.98904	0.158442	0.703689
PF3D7_1145100	0.804847	3.18765	1.98555	0.158807	0.703689
PF3D7_1466800	0.770442	3.72348	1.98467	0.158899	0.703689
PF3D7_1438800	-1.47838	0.089978	1.98124	0.159259	0.703689
PF3D7_0208700,1	0.710072	4.60099	1.98023	0.159366	0.703689
PF3D7_0208700,2	0.710072	4.60099	1.98023	0.159366	0.703689
PF3D7_1202500	1.08025	1.00251	1.97696	0.159711	0.703689
PF3D7_1225200	0.882814	2.04714	1.97678	0.15973	0.703689
PF3D7_1221000	0.757522	2.58438	1.97441	0.159981	0.703689
PF3D7_1003100	-0.787235	2.05448	1.9744	0.159982	0.703689
PF3D7_1431300	0.832034	3.11869	1.97388	0.160037	0.703689
PF3D7_0831700	0.697397	9.40389	1.96931	0.160521	0.703689
PF3D7_1123000	0.733089	4.33239	1.96793	0.160668	0.703689
PF3D7_1022000	0.756365	3.02601	1.9659	0.160884	0.703689
PF3D7_1108700	-0.760652	4.2485	1.96164	0.161338	0.703689
PF3D7_1121700	0.728944	4.22376	1.95374	0.162184	0.703689
PF3D7_1108000	0.759171	3.87468	1.95352	0.162208	0.703689
PF3D7_1102500	1.0621	0.400495	1.95159	0.162415	0.703689
PF3D7_1223800	-0.784381	3.65844	1.95131	0.162445	0.703689
PF3D7_0303200	-0.800902	2.01065	1.95019	0.162567	0.703689
PF3D7_1117200	-1.02484	1.75005	1.94944	0.162648	0.703689
PF3D7_0521300	-0.867308	2.19285	1.94925	0.162668	0.703689
PF3D7_1423700	0.711612	5.1339	1.94905	0.16269	0.703689
PF3D7_0728500	-1.57228	-0.346942	1.94863	0.162734	0.703689
PF3D7_0416800	-0.691784	7.0401	1.94802	0.162801	0.703689
PF3D7_1415100	1.03074	0.25756	1.94612	0.163005	0.703689
PF3D7_1437800	-0.803486	2.99752	1.94587	0.163033	0.703689
PF3D7_1405600	-0.693874	7.63857	1.9447	0.163159	0.703689
PF3D7_1347800	1.09124	0.0290587	1.94156	0.1635	0.703689
PF3D7_0926000	0.812404	1.74781	1.94076	0.163586	0.703689
PF3D7_1461700	-1.52265	-0.109275	1.93995	0.163674	0.703689
PF3D7_0400400	-0.802235	2.91587	1.9382	0.163865	0.703689
PF3D7_1324600	-1.01809	0.588048	1.93777	0.16391	0.703689
PF3D7_1348200	0.808638	2.32268	1.93547	0.164162	0.703689
PF3D7_1306900	0.778771	2.99731	1.93465	0.164251	0.703689
PF3D7_0514700	-2.21076	-0.398117	1.93319	0.16441	0.703689
PF3D7_0101200	-2.21076	-0.447498	1.93319	0.16441	0.703689
PF3D7_0101800	-2.21076	-0.704823	1.93319	0.16441	0.703689
PF3D7_0114300	-2.21076	-0.737372	1.93319	0.16441	0.703689
PF3D7_0115200	-2.21076	-0.688677	1.93319	0.16441	0.703689
PF3D7_0221100	-2.21076	-0.764814	1.93319	0.16441	0.703689
PF3D7_0221500	-2.21076	-0.67017	1.93319	0.16441	0.703689
PF3D7_0323300	-2.21076	-0.71368	1.93319	0.16441	0.703689
PF3D7_0506600	-2.21076	-0.579287	1.93319	0.16441	0.703689
PF3D7_0507300	-2.21076	-0.63701	1.93319	0.16441	0.703689
PF3D7_0510800	-2.21076	-0.565294	1.93319	0.16441	0.703689
PF3D7_0620000	-2.21076	-0.772688	1.93319	0.16441	0.703689
PF3D7_0626500	-2.21076	-0.604562	1.93319	0.16441	0.703689
PF3D7_0823500	-2.21076	-0.227036	1.93319	0.16441	0.703689
PF3D7_0911200	-2.21076	-0.514863	1.93319	0.16441	0.703689
PF3D7_1000700	-2.21076	-0.633725	1.93319	0.16441	0.703689
PF3D7_1012200	-2.21076	-0.712904	1.93319	0.16441	0.703689
PF3D7_1014100	-2.21076	-0.535771	1.93319	0.16441	0.703689
PF3D7_1039200	-2.21076	-0.577869	1.93319	0.16441	0.703689
PF3D7_1127700	-2.21076	-0.684011	1.93319	0.16441	0.703689
PF3D7_1128600	-2.21076	-0.686138	1.93319	0.16441	0.703689
PF3D7_1211100	-2.21076	-0.664203	1.93319	0.16441	0.703689
PF3D7_1253700	-2.21076	-0.462532	1.93319	0.16441	0.703689
PF3D7_1255100	-2.21076	-0.414163	1.93319	0.16441	0.703689
PF3D7_1325300	-2.21076	-0.65389	1.93319	0.16441	0.703689
PF3D7_1413000	-2.21076	-0.766845	1.93319	0.16441	0.703689
PF3D7_1423100	-2.21076	-0.709832	1.93319	0.16441	0.703689
PF3D7_1478000	-2.21076	0.151599	1.93319	0.16441	0.703689
PF3D7_0221300	-2.21076	-0.825013	1.93319	0.16441	0.703689
PF3D7_0500600	-2.21076	-0.762374	1.93319	0.16441	0.703689
PF3D7_0728700	-2.21076	-0.682207	1.93319	0.16441	0.703689
PF3D7_0802700	-2.21076	-0.794488	1.93319	0.16441	0.703689
PF3D7_0937300	-2.21076	-0.825013	1.93319	0.16441	0.703689
PF3D7_1041100	-2.21076	-0.825013	1.93319	0.16441	0.703689
PF3D7_1121800	-2.21076	-0.704876	1.93319	0.16441	0.703689
PF3D7_1137600	-2.21076	-0.825013	1.93319	0.16441	0.703689
PF3D7_1333100	-2.21076	-0.825013	1.93319	0.16441	0.703689
PF3D7_1431100	-2.21076	-0.769592	1.93319	0.16441	0.703689
PF3D7_1466500	-2.21076	-0.79858	1.93319	0.16441	0.703689
PF3D7_1477900	-2.21076	-0.825013	1.93319	0.16441	0.703689
PF3D7_0318800	-2.21076	-0.683062	1.93319	0.16441	0.703689
PF3D7_0400900	-2.21076	-0.654791	1.93319	0.16441	0.703689
PF3D7_0507400	-2.21076	-0.65434	1.93319	0.16441	0.703689
PF3D7_0512400	-2.21076	-0.345827	1.93319	0.16441	0.703689
PF3D7_0615100	-2.21076	-0.267987	1.93319	0.16441	0.703689
PF3D7_1026400	-2.21076	-0.634708	1.93319	0.16441	0.703689
PF3D7_1239400	-2.21076	-0.742768	1.93319	0.16441	0.703689
PF3D7_1249700	-2.21076	-0.318171	1.93319	0.16441	0.703689
PF3D7_1447500	-2.21076	-0.445517	1.93319	0.16441	0.703689
PF3D7_0701900	1.29374	2.45387	1.9264	0.165153	0.705555
PF3D7_0527100	-0.688544	7.06886	1.92616	0.165179	0.705555
PF3D7_0805500	-0.87727	2.38137	1.92552	0.16525	0.705555
PF3D7_1461100	0.986043	0.616349	1.92465	0.165345	0.705555
PF3D7_1340600	0.739257	3.56684	1.92033	0.16582	0.706126
PF3D7_1335100	-0.886258	1.17623	1.91954	0.165908	0.706126
PF3D7_1116200,1	-0.694982	7.17999	1.91827	0.166048	0.706126
PF3D7_1116200,2	-0.694982	7.17999	1.91827	0.166048	0.706126
PF3D7_1351400	-0.682596	9.31304	1.91602	0.166296	0.706126
PF3D7_1124400	0.790536	2.21024	1.916	0.166298	0.706126
PF3D7_1108300	0.901899	0.692066	1.91543	0.166361	0.706126
PF3D7_1307800	0.771172	2.64969	1.91438	0.166478	0.706126
PF3D7_1208400	-1.24028	0.279366	1.91157	0.166789	0.706916
PF3D7_1246200	-0.6889	5.38232	1.90929	0.167042	0.706984
PF3D7_1469100	-0.910007	1.74999	1.90917	0.167055	0.706984
PF3D7_1424400	0.703483	6.1215	1.90622	0.167384	0.707846
PF3D7_0822300	0.697746	4.54341	1.90355	0.167681	0.708047
PF3D7_1129800	-1.24871	0.469487	1.90354	0.167682	0.708047
PF3D7_1215500	1.15453	-0.252969	1.9022	0.167832	0.708152
PF3D7_1308300	-0.679859	8.62921	1.89949	0.168135	0.708606
PF3D7_1448900	0.753023	1.99861	1.89779	0.168326	0.708606
PF3D7_1412700	0.97841	1.64345	1.89723	0.168389	0.708606
PF3D7_0402200	1.22625	1.17305	1.89533	0.168602	0.708606
PF3D7_0302100	0.789714	3.48485	1.89454	0.168691	0.708606
PF3D7_1021700	0.734095	3.81309	1.89356	0.168801	0.708606
PF3D7_0105700	0.788426	1.86915	1.89324	0.168837	0.708606
PF3D7_1024900	-0.920594	0.680967	1.8923	0.168942	0.708606
PF3D7_0519400	-0.675827	9.08671	1.88326	0.169964	0.712141
PF3D7_1109000	-0.742228	3.75106	1.88261	0.170037	0.712141
PF3D7_1134900	-1.36228	-0.109964	1.87406	0.171011	0.714462
PF3D7_1352700	0.739993	3.84347	1.8738	0.171041	0.714462
PF3D7_0503000	-0.722063	3.10977	1.87352	0.171072	0.714462
PF3D7_1435000	-0.798644	1.47152	1.87331	0.171097	0.714462
PF3D7_1341400	-0.795173	2.34923	1.86966	0.171514	0.714891
PF3D7_1030300	0.861632	1.05413	1.86902	0.171587	0.714891
PF3D7_1474700	1.20602	-0.220841	1.86839	0.17166	0.714891
PF3D7_0917700	-1.03385	1.54482	1.86799	0.171705	0.714891
PF3D7_1433400	0.694984	4.71951	1.86644	0.171884	0.715077
PF3D7_1349200	0.700703	4.71396	1.86429	0.172131	0.715077
PF3D7_1238900	0.79265	2.0934	1.86212	0.17238	0.715077
PF3D7_0918600	-1.00506	0.575909	1.86008	0.172616	0.715077
PF3D7_0937600	1.30706	0.885877	1.85941	0.172693	0.715077
PF3D7_1445400	0.752302	3.98168	1.85816	0.172837	0.715077
PF3D7_1106500	0.759968	2.88086	1.85812	0.172842	0.715077
PF3D7_1221400	-1.02385	0.556407	1.85611	0.173074	0.715077
PF3D7_1342600	0.815899	2.88209	1.85568	0.173124	0.715077
PF3D7_0320600	0.973793	0.0953859	1.85529	0.173169	0.715077
PF3D7_1021200	-0.805152	1.50449	1.8546	0.173249	0.715077
PF3D7_1346300	-0.675868	8.01171	1.85339	0.17339	0.715077
PF3D7_1309900	0.858776	0.604032	1.85335	0.173394	0.715077
PF3D7_0510200	-0.809434	2.35062	1.85049	0.173727	0.715925
PF3D7_0815600	-0.677179	7.25692	1.84606	0.174243	0.717174
PF3D7_0703500	0.683021	6.34662	1.84571	0.174283	0.717174
PF3D7_0412300	-1.32252	-0.129591	1.84015	0.174934	0.719163
PF3D7_0724000	0.902023	0.771191	1.83896	0.175073	0.719163
PF3D7_0104900	0.671148	5.99199	1.83743	0.175252	0.719163
PF3D7_0933800	-1.68925	-0.41924	1.83724	0.175275	0.719163
PF3D7_1302000	0.733623	4.97552	1.83271	0.175807	0.720576
PF3D7_1365800	-0.828435	2.60826	1.83214	0.175875	0.720576
PF3D7_1230500	0.972531	1.5729	1.82829	0.176329	0.721694
PF3D7_0629900	-0.705917	5.16441	1.82767	0.176403	0.721694
PF3D7_1449200	-0.757797	2.22631	1.82593	0.176609	0.722015
PF3D7_1427700	-0.830532	0.758101	1.82171	0.17711	0.72331
PF3D7_1131100	-0.79611	3.30819	1.82056	0.177247	0.72331
PF3D7_1135400	0.68724	5.39185	1.82003	0.17731	0.72331
PF3D7_1014800	-1.27933	0.0396621	1.8134	0.1781	0.725889
PF3D7_1465600	1.50301	-0.206425	1.80909	0.178617	0.725889
PF3D7_0105200	0.725953	2.50862	1.80855	0.178682	0.725889
PF3D7_1035400	-0.869064	1.41072	1.80809	0.178737	0.725889
PF3D7_0823700	0.742476	2.59673	1.80756	0.178801	0.725889
PF3D7_1441800	-0.824351	1.19567	1.80754	0.178804	0.725889
PF3D7_1223600	-0.900119	1.38555	1.80724	0.17884	0.725889
PF3D7_0204300	0.799433	2.23044	1.79897	0.179837	0.729411
PF3D7_1213300	1.76086	-0.673484	1.79729	0.180041	0.729557
PF3D7_1350600	-1.30542	-0.01014	1.79627	0.180164	0.729557
PF3D7_0907500	-0.975161	0.774025	1.79482	0.18034	0.729557
PF3D7_0711200	-1.1407	0.726842	1.79442	0.180389	0.729557
PF3D7_0103300	-0.784393	3.05427	1.7875	0.181232	0.73244
PF3D7_0619100	-0.965131	1.35977	1.78447	0.181602	0.732903
PF3D7_1477000	-0.869754	2.40882	1.7839	0.181672	0.732903
PF3D7_1244100	0.731601	3.01468	1.78179	0.181929	0.732903
PF3D7_0309900	-0.838254	1.6664	1.78072	0.182061	0.732903
PF3D7_1029000	-1.39201	0.0805153	1.77842	0.182343	0.732903
PF3D7_1453500	-1.39201	-0.206892	1.77842	0.182343	0.732903
PF3D7_0707700	-0.680125	4.91961	1.77791	0.182406	0.732903
PF3D7_1404600,1	-0.939183	0.698203	1.77599	0.182642	0.732903
PF3D7_1404600,2	-0.939183	0.698203	1.77599	0.182642	0.732903
PF3D7_1404600,3	-0.939183	0.698203	1.77599	0.182642	0.732903
PF3D7_0105100	-1.03697	-0.0367729	1.77091	0.18327	0.734513
PF3D7_1247800	1.27973	0.19613	1.76856	0.183561	0.734513
PF3D7_1006800	-0.656453	8.06825	1.76714	0.183736	0.734513
PF3D7_0205600	-0.734741	2.43905	1.76025	0.184594	0.734513
PF3D7_0103400	0.716121	3.15998	1.75978	0.184652	0.734513
PF3D7_1247300	0.869509	1.41734	1.7597	0.184662	0.734513
PF3D7_0209200	0.685541	3.95712	1.75957	0.184678	0.734513
PF3D7_1459800	0.668158	5.0616	1.75813	0.184858	0.734513
PF3D7_1016400	0.658724	6.4069	1.75808	0.184864	0.734513
PF3D7_1406000	-0.67038	4.79835	1.75665	0.185043	0.734513
PF3D7_0416700	0.705011	2.64988	1.75648	0.185064	0.734513
PF3D7_0110400	-0.811713	3.48484	1.75572	0.185159	0.734513
PF3D7_1134400	0.903949	1.71854	1.75538	0.185202	0.734513
PF3D7_1446000	0.668403	4.91869	1.75375	0.185407	0.734513
PF3D7_0601100	1.93574	-0.407616	1.74864	0.186047	0.734513
PF3D7_0627000	1.93574	-0.813101	1.74864	0.186047	0.734513
PF3D7_1005200	1.93574	-0.727643	1.74864	0.186047	0.734513
PF3D7_1210200	1.93574	-0.815654	1.74864	0.186047	0.734513
PF3D7_0114500	1.93574	-0.344884	1.74864	0.186047	0.734513
PF3D7_1402600	1.93574	0.12369	1.74864	0.186047	0.734513
PF3D7_1436200	1.13857	0.139517	1.7458	0.186406	0.734513
PF3D7_1459400	0.804906	3.00508	1.74484	0.186527	0.734513
PF3D7_0929100	0.716862	1.95413	1.73632	0.187606	0.734513
PF3D7_0311200	0.936101	1.49077	1.73552	0.187707	0.734513
PF3D7_0423900	-1.23496	1.87909	1.73543	0.187719	0.734513
PF3D7_0626300	-1.17597	0.271012	1.73533	0.187732	0.734513
PF3D7_1367200	1.72419	-0.327259	1.73501	0.187773	0.734513
PF3D7_0409300	0.860273	1.86494	1.73433	0.187858	0.734513
PF3D7_1342700	-0.656454	6.60516	1.73429	0.187863	0.734513
PF3D7_1467700	-0.698579	2.36599	1.7334	0.187977	0.734513
PF3D7_0700700	1.91601	-0.785647	1.73286	0.188046	0.734513
PF3D7_0301300	1.91601	-0.813948	1.73286	0.188046	0.734513
PF3D7_0905100	-0.662719	6.04528	1.73185	0.188175	0.734513
PF3D7_0822200	-1.42867	0.497028	1.73107	0.188274	0.734513
PF3D7_0603500	-0.825496	0.883911	1.7297	0.188449	0.734513
PF3D7_1222100	0.814846	0.797136	1.72941	0.188486	0.734513
PF3D7_0707400	0.682612	3.8311	1.72913	0.188521	0.734513
PF3D7_0517200	0.873627	2.01955	1.72721	0.188767	0.734513
PF3D7_0521200	1.00589	-0.166783	1.72664	0.18884	0.734513
PF3D7_0813300	-0.651122	7.50837	1.72609	0.188911	0.734513
PF3D7_0706900	1.9066	-0.731469	1.72528	0.189015	0.734513
PF3D7_0201400	1.9066	-0.785922	1.72528	0.189015	0.734513
PF3D7_0702700	1.9066	-0.723912	1.72528	0.189015	0.734513
PF3D7_0632100	1.9066	-0.845216	1.72528	0.189015	0.734513
PF3D7_0425600	1.9066	-0.575182	1.72528	0.189015	0.734513
PF3D7_0305500	0.672442	5.37401	1.72524	0.189019	0.734513
PF3D7_0106800	-0.651902	5.38316	1.72268	0.189348	0.734774
PF3D7_1241700	-0.67816	3.18034	1.72205	0.18943	0.734774
PF3D7_1356200	-0.681613	4.24785	1.72168	0.189477	0.734774
PF3D7_1139900	-0.706581	3.44538	1.71934	0.189779	0.735441
PF3D7_0628600	0.694905	3.77227	1.71709	0.190068	0.736059
PF3D7_1473600	-0.694197	3.05552	1.71506	0.19033	0.736568
PF3D7_1426200	0.662332	4.46646	1.71116	0.190835	0.737634
PF3D7_0612100	0.690818	3.99223	1.71092	0.190866	0.737634
PF3D7_1472000	-0.674189	4.70461	1.70943	0.191059	0.737875
PF3D7_1336600	-0.734703	1.78455	1.70615	0.191486	0.738492
PF3D7_1212300	-0.796815	1.6151	1.70473	0.19167	0.738492
PF3D7_0710100	0.751337	2.1113	1.70469	0.191675	0.738492
PF3D7_1338000	-0.684013	3.16576	1.70401	0.191764	0.738492
PF3D7_1347100	-0.750583	2.12507	1.70176	0.192057	0.738492
PF3D7_1211000	-1.11693	0.46862	1.70169	0.192068	0.738492
PF3D7_0523000	0.655314	6.32826	1.70038	0.192239	0.738492
PF3D7_1011800	0.650534	6.67482	1.70007	0.192279	0.738492
PF3D7_1457700	0.715865	3.96144	1.69919	0.192395	0.738492
PF3D7_0815500	-0.937336	0.718494	1.69696	0.192686	0.73911
PF3D7_0602700	-1.38091	0.0092371	1.69159	0.193391	0.739146
PF3D7_1118000	-0.68824	3.28663	1.6911	0.193456	0.739146
PF3D7_0714600	0.749145	2.27622	1.69107	0.19346	0.739146
PF3D7_0800700	1.34812	-0.178567	1.69106	0.193462	0.739146
PF3D7_1222000	0.882264	1.13339	1.68905	0.193726	0.739146
PF3D7_1334100	-0.711134	1.85661	1.68905	0.193726	0.739146
PF3D7_1364300	0.796527	2.91528	1.68851	0.193798	0.739146
PF3D7_1449800	0.726938	2.34202	1.68766	0.19391	0.739146
PF3D7_1228400	0.741542	3.17462	1.68634	0.194084	0.739146
PF3D7_1026900	1.24065	-0.380752	1.68626	0.194094	0.739146
PF3D7_1415000	0.724447	1.83934	1.68556	0.194188	0.739146
PF3D7_1440700	0.923214	0.904507	1.68498	0.194264	0.739146
PF3D7_0926100	0.681264	5.01889	1.68184	0.19468	0.739575
PF3D7_0914600	-0.68331	3.98934	1.68169	0.1947	0.739575
PF3D7_1321600	-1.09135	0.957533	1.68001	0.194923	0.739575
PF3D7_1446100	-1.19495	0.439264	1.67993	0.194934	0.739575
PF3D7_1222800	1.04299	-0.292987	1.67916	0.195036	0.739575
PF3D7_1229700	-0.77385	1.05801	1.67821	0.195162	0.739575
PF3D7_0202600,1	0.693397	2.78166	1.67529	0.195552	0.740061
PF3D7_0202600,2	0.693397	2.78166	1.67529	0.195552	0.740061
PF3D7_1002600	-1.01342	0.00751761	1.6729	0.195871	0.740772
PF3D7_0925300	-0.728777	1.61774	1.6712	0.196098	0.741096
PF3D7_0214300	1.13727	0.351288	1.66952	0.196323	0.741096
PF3D7_1027500	0.677821	2.56808	1.66932	0.19635	0.741096
PF3D7_0630100	1.20361	0.39146	1.66819	0.196501	0.741171
PF3D7_1357400	0.750162	1.80899	1.66569	0.196837	0.741828
PF3D7_1138400	-0.947319	0.457093	1.66494	0.196937	0.741828
PF3D7_0721100	0.649092	4.20578	1.66368	0.197107	0.741844
PF3D7_0731100	0.685774	7.00571	1.66287	0.197217	0.741844
PF3D7_0601200	0.834032	1.62939	1.66199	0.197335	0.741844
PF3D7_0318200	0.666665	5.31888	1.66047	0.197539	0.742103
PF3D7_0312200	1.03696	0.0470847	1.65953	0.197667	0.742103
PF3D7_0204500	0.726687	2.51817	1.65604	0.198139	0.74232
PF3D7_1138300	-1.40164	-0.47469	1.65512	0.198263	0.74232
PF3D7_1201100	0.76174	2.68857	1.65365	0.198462	0.74232
PF3D7_0216600	0.686947	4.93378	1.65293	0.198561	0.74232
PF3D7_0830400	-0.635427	8.18273	1.6528	0.198578	0.74232
PF3D7_1467500	-0.678921	3.55207	1.65245	0.198626	0.74232
PF3D7_0629600	0.711525	3.28317	1.64949	0.199028	0.74232
PF3D7_0418000	-0.723336	2.60375	1.6483	0.199191	0.74232
PF3D7_0626700	0.654817	4.40911	1.64787	0.19925	0.74232
PF3D7_1237900	0.666607	4.83985	1.64755	0.199293	0.74232
PF3D7_1323100	-0.632474	8.83763	1.64613	0.199487	0.74232
PF3D7_1315400	0.649896	4.95911	1.64535	0.199593	0.74232
PF3D7_0817700	-0.769578	2.08806	1.64422	0.199747	0.74232
PF3D7_0505500	-0.660941	3.31932	1.64269	0.199957	0.74232
PF3D7_1372700	-0.805179	1.4951	1.64207	0.200042	0.74232
PF3D7_1333900	-0.79132	1.14829	1.64194	0.20006	0.74232
PF3D7_0405400	0.64556	6.14219	1.6418	0.200078	0.74232
PF3D7_1006100	-0.859897	0.793295	1.64174	0.200088	0.74232
PF3D7_0923400	0.719459	2.47737	1.63725	0.200704	0.743768
PF3D7_0529000	0.666458	4.14678	1.63562	0.200927	0.743768
PF3D7_1412300	0.635968	5.16009	1.63543	0.200954	0.743768
PF3D7_1240100	-1.3928	2.69754	1.63506	0.201004	0.743768
PF3D7_1341900	-0.639946	6.10248	1.63351	0.201218	0.743781
PF3D7_1113000	-0.963518	0.487689	1.63272	0.201328	0.743781
PF3D7_1110600	-0.675043	2.92026	1.63218	0.201402	0.743781
PF3D7_0108500	-0.666426	7.59089	1.62739	0.202065	0.74574
PF3D7_1318800	0.693241	3.97297	1.62557	0.202317	0.746186
PF3D7_1115700	0.629195	7.42464	1.61917	0.203208	0.748468
PF3D7_1439700	0.672673	2.34567	1.61644	0.203589	0.748468
PF3D7_0825600	-1.0739	-0.139153	1.615	0.203791	0.748468
PF3D7_0913600	-0.835351	0.823278	1.61487	0.203809	0.748468
PF3D7_0613000,1	0.631068	4.81666	1.61448	0.203863	0.748468
PF3D7_0613000,2	0.631068	4.81666	1.61448	0.203863	0.748468
PF3D7_0613000,3	0.631068	4.81666	1.61448	0.203863	0.748468
PF3D7_0722900	-1.6291	-0.264665	1.60384	0.20536	0.753073
PF3D7_1321700	-0.6915	4.07432	1.60298	0.205482	0.753073
PF3D7_1201800	-0.826416	0.532779	1.60085	0.205783	0.753073
PF3D7_1434700	-0.649875	4.57874	1.5994	0.205988	0.753073
PF3D7_1222400	0.706316	2.30574	1.59828	0.206147	0.753073
PF3D7_1466900	0.719196	2.77484	1.59817	0.206163	0.753073
PF3D7_1435700,1	0.70852	2.78465	1.59803	0.206183	0.753073
PF3D7_1435700,2	0.70852	2.78465	1.59803	0.206183	0.753073
PF3D7_1365500	0.684144	2.55247	1.59681	0.206356	0.753219
PF3D7_1360300	-0.772932	1.28287	1.59542	0.206554	0.753454
PF3D7_1422000	0.702198	1.82076	1.59359	0.206814	0.753731
PF3D7_0921900	0.662382	4.04752	1.59108	0.207172	0.753731
PF3D7_0604700	-0.663299	2.9355	1.59012	0.207309	0.753731
PF3D7_1446200	0.634207	5.68048	1.58898	0.207473	0.753731
PF3D7_0509800	0.666121	3.84356	1.58893	0.207479	0.753731
PF3D7_1143200	-0.775636	0.681939	1.58889	0.207484	0.753731
PF3D7_0917500	-0.708354	1.51878	1.58802	0.207609	0.753731
PF3D7_1340900	0.634875	6.40551	1.58741	0.207696	0.753731
PF3D7_1012400	-0.618853	9.93486	1.58563	0.207952	0.753828
PF3D7_0206000	-0.7376	2.62547	1.58511	0.208025	0.753828
PF3D7_1350200	0.632837	4.44574	1.58381	0.208212	0.753828
PF3D7_0517700	0.629564	5.68142	1.58013	0.208742	0.753828
PF3D7_1423000	0.657299	4.43135	1.57841	0.20899	0.753828
PF3D7_0202500	-0.647704	10.1695	1.57769	0.209094	0.753828
PF3D7_0613800	-0.699128	1.99543	1.57611	0.209322	0.753828
PF3D7_1200400	-0.68899	3.25576	1.57542	0.209421	0.753828
PF3D7_0302400	-1.54923	-0.254758	1.5753	0.209439	0.753828
PF3D7_1356000	-1.54923	-0.442638	1.5753	0.209439	0.753828
PF3D7_1411700	0.961654	1.18957	1.57421	0.209597	0.753828
PF3D7_1332500	0.752463	3.39262	1.57209	0.209903	0.753828
PF3D7_1233900	-0.652279	4.4055	1.57177	0.20995	0.753828
PF3D7_0913300	-0.754175	3.8131	1.57169	0.209961	0.753828
PF3D7_1361100	-0.654792	5.52835	1.57143	0.209999	0.753828
PF3D7_1009000	0.713935	2.94859	1.57076	0.210097	0.753828
PF3D7_1115500	-0.644511	3.27243	1.57075	0.210098	0.753828
PF3D7_1468200	0.64469	4.07895	1.57058	0.210122	0.753828
PF3D7_1303900	-1.24785	-0.0740633	1.56901	0.210351	0.753983
PF3D7_1339300	0.630348	5.56735	1.56845	0.210432	0.753983
PF3D7_1352400	-0.736951	2.64297	1.56668	0.21069	0.754428
PF3D7_0929300	0.768123	1.01339	1.56562	0.210844	0.754502
PF3D7_1013300	-0.830356	1.41451	1.5641	0.211066	0.754814
PF3D7_1124800	0.637013	4.6614	1.56225	0.211336	0.754814
PF3D7_0718100	0.772477	0.985588	1.56212	0.211355	0.754814
PF3D7_1013100	0.68882	3.34673	1.56084	0.211542	0.754814
PF3D7_1427200	-0.904431	0.601144	1.55984	0.211688	0.754814
PF3D7_1223500	0.680949	3.13895	1.55954	0.211733	0.754814
PF3D7_0916100	-0.703147	2.1008	1.55846	0.211891	0.754903
PF3D7_1329900	-0.852444	0.90998	1.55696	0.21211	0.755209
PF3D7_0415900	-0.614772	8.90603	1.55331	0.212647	0.756643
PF3D7_1360200	-0.622193	6.67756	1.55144	0.212922	0.756847
PF3D7_1422100	0.71114	1.5779	1.55032	0.213087	0.756847
PF3D7_0507500	-1.34789	0.132699	1.55005	0.213128	0.756847
PF3D7_1201200	-1.39331	2.42172	1.54929	0.21324	0.756847
PF3D7_1413100	1.61348	-0.400359	1.54344	0.214106	0.759091
PF3D7_0219200	-0.611328	9.0013	1.54321	0.21414	0.759091
PF3D7_1310700	1.45183	0.757197	1.54177	0.214355	0.759375
PF3D7_0218300	-0.678567	2.26697	1.53778	0.214949	0.760827
PF3D7_1038600	-1.58887	-0.40854	1.53721	0.215034	0.760827
PF3D7_1106000	0.637438	4.31178	1.53331	0.215616	0.761572
PF3D7_1235800	-0.85695	0.755423	1.53325	0.215625	0.761572
PF3D7_1311200	-0.890482	0.843716	1.53254	0.215732	0.761572
PF3D7_1408600	-0.611326	8.73536	1.5322	0.215783	0.761572
PF3D7_0802800	-1.37064	-0.306082	1.52396	0.217021	0.765395
PF3D7_1207800	-0.931393	1.06277	1.52319	0.217137	0.765395
PF3D7_1250500	0.64771	2.86187	1.52129	0.217424	0.765928
PF3D7_0733000	-0.653049	4.20279	1.51753	0.217994	0.767459
PF3D7_0512600	-0.612311	7.12275	1.51578	0.218259	0.767913
PF3D7_0223100	-0.693045	4.07186	1.51336	0.218627	0.768517
PF3D7_0726900	0.665888	2.3756	1.51273	0.218723	0.768517
PF3D7_0815700	-1.33023	0.37125	1.51138	0.218929	0.768517
PF3D7_0708200	-0.655939	3.72192	1.51108	0.218974	0.768517
PF3D7_1200800	0.647253	4.93673	1.50984	0.219164	0.768704
PF3D7_0205000	1.43405	-0.388038	1.50821	0.219412	0.768908
PF3D7_0727000	0.802939	1.47317	1.50768	0.219494	0.768908
PF3D7_0813000	-0.731811	2.82824	1.5061	0.219735	0.769164
PF3D7_1251700	0.675151	2.38447	1.50261	0.22027	0.769164
PF3D7_0912100	-0.69463	2.47972	1.50084	0.220542	0.769164
PF3D7_1241300	-1.10028	-0.307111	1.49924	0.220788	0.769164
PF3D7_0720800	-0.617537	4.47688	1.499	0.220826	0.769164
PF3D7_1010900	0.682135	2.18027	1.49878	0.220859	0.769164
PF3D7_0629700	0.615938	5.30338	1.49863	0.220882	0.769164
PF3D7_0935700	0.904214	1.74549	1.49786	0.221002	0.769164
PF3D7_1334000	-0.983664	-0.111038	1.49785	0.221003	0.769164
PF3D7_1457300	0.623429	4.60871	1.49652	0.221208	0.769164
PF3D7_0923100	-0.943307	0.668658	1.4964	0.221226	0.769164
PF3D7_0919400	-0.661062	1.6618	1.49548	0.221368	0.769164
PF3D7_0702500	-0.602511	10.1328	1.49451	0.221517	0.769164
PF3D7_0321900	-0.69238	3.59956	1.49447	0.221525	0.769164
PF3D7_0527200	0.68677	2.78007	1.49393	0.221607	0.769164
PF3D7_0720000	-0.661013	3.93783	1.49302	0.221749	0.769183
PF3D7_0408400	0.747701	0.637378	1.49196	0.221912	0.769277
PF3D7_0727300	-0.751038	2.05476	1.4895	0.222293	0.769918
PF3D7_1338200	0.607666	6.32701	1.48822	0.222492	0.769918
PF3D7_1335700	-0.721275	1.94973	1.4873	0.222636	0.769918
PF3D7_0715800	0.644367	2.74098	1.48633	0.222787	0.769918
PF3D7_1312200	-1.18361	-0.186548	1.48618	0.22281	0.769918
PF3D7_1134000	0.617834	5.74073	1.48452	0.223069	0.769918
PF3D7_1344100	0.802209	2.07992	1.48312	0.223287	0.769918
PF3D7_1405800	0.66803	3.94445	1.48302	0.223303	0.769918
PF3D7_0814200	-0.604037	7.54424	1.48289	0.223323	0.769918
PF3D7_1324200	-0.639357	4.11187	1.48195	0.22347	0.769957
PF3D7_0109800	-0.622089	5.07636	1.47584	0.224427	0.77036
PF3D7_0728200	1.41641	-0.327599	1.47531	0.224509	0.77036
PF3D7_0814600	1.41641	-0.0468079	1.47531	0.224509	0.77036
PF3D7_1038500	1.41641	-0.595426	1.47531	0.224509	0.77036
PF3D7_1352200	0.665002	3.91688	1.47358	0.224781	0.77036
PF3D7_0728400,1	-0.846423	0.526469	1.47304	0.224867	0.77036
PF3D7_0728400,2	-0.846423	0.526469	1.47304	0.224867	0.77036
PF3D7_1445700	0.622445	4.5051	1.47261	0.224934	0.77036
PF3D7_1213600	0.612996	3.62641	1.47099	0.225189	0.77036
PF3D7_0729000	0.62359	4.10673	1.47062	0.225248	0.77036
PF3D7_1144700	-0.696441	1.86466	1.47024	0.225308	0.77036
PF3D7_1143500	-1.13202	-0.193795	1.46948	0.225429	0.77036
PF3D7_1128100	0.616895	4.06269	1.46936	0.225447	0.77036
PF3D7_0305200	0.795607	1.61613	1.46906	0.225494	0.77036
PF3D7_0217800	-0.595499	9.25756	1.46457	0.226204	0.770985
PF3D7_1134200	0.697056	2.83426	1.46451	0.226213	0.770985
PF3D7_1309200	-0.628132	4.95626	1.46368	0.226346	0.770985
PF3D7_0613100	0.627584	3.41179	1.46306	0.226444	0.770985
PF3D7_1476000	-0.751444	3.38573	1.46306	0.226445	0.770985
PF3D7_0824000	1.1015	-0.442818	1.46273	0.226496	0.770985
PF3D7_0937700	1.55999	0.228916	1.45959	0.226996	0.771554
PF3D7_0715100	-1.62463	-0.333607	1.45918	0.22706	0.771554
PF3D7_0219100	-0.741277	2.11139	1.4586	0.227153	0.771554
PF3D7_1100100	-0.627065	3.99259	1.45825	0.227209	0.771554
PF3D7_1115300	0.611352	5.61764	1.45379	0.227921	0.773365
PF3D7_1440600	-0.860885	0.776482	1.4532	0.228015	0.773365
PF3D7_1251100	-0.612166	6.00945	1.45125	0.228327	0.773958
PF3D7_1345100	0.601963	6.3136	1.44881	0.228719	0.774509
PF3D7_0108000	-0.598146	6.25722	1.44853	0.228764	0.774509
PF3D7_1412400	-0.656995	3.71773	1.44738	0.22895	0.774674
PF3D7_0719600	-0.592662	8.76707	1.44523	0.229294	0.775376
PF3D7_1354500	-0.620095	4.97457	1.44336	0.229597	0.775937
PF3D7_1446700	0.642879	2.57529	1.44156	0.229888	0.776455
PF3D7_0819200	0.807563	0.477523	1.44019	0.230108	0.776736
PF3D7_1330500	-0.736964	1.55971	1.43917	0.230273	0.776765
PF3D7_0305300	0.637346	4.52422	1.43844	0.230392	0.776765
PF3D7_0411200	-0.645137	2.44323	1.43682	0.230655	0.777189
PF3D7_1224100	0.738413	1.06722	1.43036	0.231705	0.780263
PF3D7_0403300	0.799471	0.72238	1.42825	0.232051	0.780633
PF3D7_1013500	0.653769	2.60563	1.42639	0.232354	0.780633
PF3D7_1457000	0.602557	5.42116	1.42631	0.232367	0.780633
PF3D7_1146100	-0.804604	0.79781	1.42565	0.232476	0.780633
PF3D7_0209100	-0.900942	2.04824	1.42547	0.232505	0.780633
PF3D7_0303700	-0.625275	3.27699	1.42182	0.233104	0.781115
PF3D7_0219600	-0.624194	2.82724	1.42076	0.233279	0.781115
PF3D7_1407800	0.589073	7.65969	1.42061	0.233303	0.781115
PF3D7_1370200	1.53375	0.123376	1.41943	0.233497	0.781115
PF3D7_0523800	-0.719649	3.7715	1.41921	0.233533	0.781115
PF3D7_1431700	-0.587144	8.77718	1.41919	0.233537	0.781115
PF3D7_0425800	-0.89723	2.51934	1.41823	0.233694	0.781115
PF3D7_0303500	0.775057	1.22664	1.41746	0.233822	0.781115
PF3D7_0528200	0.602225	5.43258	1.41703	0.233892	0.781115
PF3D7_1243300	0.979225	-0.328079	1.41343	0.234488	0.781887
PF3D7_1474200	-0.763208	1.91971	1.41322	0.234522	0.781887
PF3D7_1122200	-0.699168	3.16771	1.41234	0.234668	0.781887
PF3D7_1007400	-0.755422	1.79884	1.41229	0.234677	0.781887
PF3D7_1237100	0.707393	2.1579	1.41049	0.234976	0.782422
PF3D7_1421200	-0.585458	8.2612	1.40756	0.235462	0.783581
PF3D7_1223000	-0.852952	0.129387	1.40659	0.235623	0.783654
PF3D7_1237200	0.636058	4.12539	1.40504	0.235881	0.784026
PF3D7_0220400	-1.32054	0.137493	1.40426	0.236012	0.784026
PF3D7_0721900	0.637099	3.13608	1.40192	0.236403	0.784736
PF3D7_1125400	0.627872	3.67018	1.40132	0.236503	0.784736
PF3D7_1117400	-0.660449	2.64659	1.39909	0.236877	0.784996
PF3D7_1472500	1.37508	-0.093037	1.39905	0.236882	0.784996
PF3D7_1147300	0.627963	2.67995	1.39836	0.236998	0.784996
PF3D7_1030100	-0.622067	4.32671	1.3949	0.23758	0.785553
PF3D7_0802000	0.595321	5.48973	1.3949	0.23758	0.785553
PF3D7_1403800	-0.982626	0.341898	1.39488	0.237583	0.785553
PF3D7_0209600	-0.818923	0.296941	1.3871	0.238896	0.785703
PF3D7_0610200	0.625933	3.32182	1.38481	0.239283	0.785703
PF3D7_1405300	0.819088	0.452596	1.38474	0.239296	0.785703
PF3D7_0731400	0.728331	1.41568	1.38393	0.239434	0.785703
PF3D7_0625500	0.773635	1.06427	1.38362	0.239486	0.785703
PF3D7_0418300	0.603935	5.69044	1.38286	0.239614	0.785703
PF3D7_0918500	-0.579186	6.97937	1.38277	0.239629	0.785703
PF3D7_0532500	0.620547	2.72346	1.38264	0.239652	0.785703
PF3D7_0402300	1.36575	-0.14709	1.38254	0.239668	0.785703
PF3D7_1300900	1.36575	-0.104078	1.38254	0.239668	0.785703
PF3D7_1473400	1.36575	-0.683749	1.38254	0.239668	0.785703
PF3D7_0722800	1.36575	-0.601719	1.38254	0.239668	0.785703
PF3D7_0937500	1.36575	-0.404306	1.38254	0.239668	0.785703
PF3D7_1039100	1.36575	-0.0940235	1.38254	0.239668	0.785703
PF3D7_0110100	0.682394	2.25198	1.38228	0.239713	0.785703
PF3D7_1010200	0.632876	4.02304	1.38089	0.23995	0.786024
PF3D7_0214100	0.6591	3.58772	1.37925	0.240229	0.786484
PF3D7_0632800	-0.686809	3.96756	1.37482	0.240986	0.788419
PF3D7_1408000	0.578337	7.21736	1.37189	0.241487	0.788419
PF3D7_0716700	-0.827762	0.461754	1.37169	0.241522	0.788419
PF3D7_1467900	0.629638	2.70608	1.37132	0.241585	0.788419
PF3D7_1019900	0.733279	1.7191	1.36846	0.242076	0.788419
PF3D7_0722400	-0.594503	5.36496	1.36812	0.242136	0.788419
PF3D7_1119000	0.631574	2.19076	1.36806	0.242146	0.788419
PF3D7_0731600	0.597892	4.10194	1.36769	0.242209	0.788419
PF3D7_1454600	0.631345	2.93407	1.3676	0.242225	0.788419
PF3D7_0312100	0.780301	0.50096	1.36689	0.242347	0.788419
PF3D7_0518300	-0.578878	6.42365	1.36685	0.242354	0.788419
PF3D7_0629500	0.657853	3.05949	1.36583	0.242529	0.788518
PF3D7_1122100	-0.832635	0.0734467	1.36486	0.242698	0.788518
PF3D7_0918100	0.609288	4.41856	1.36424	0.242803	0.788518
PF3D7_0310500	0.619242	3.53971	1.36171	0.243241	0.789476
PF3D7_0322600	-0.695154	2.28647	1.3603	0.243485	0.789476
PF3D7_1101300	-1.29177	0.342949	1.36012	0.243517	0.789476
PF3D7_1212600,1	-0.58966	4.20125	1.35686	0.244083	0.790215
PF3D7_1212600,2	-0.58966	4.20125	1.35686	0.244083	0.790215
PF3D7_0424200	1.35005	-0.458577	1.35415	0.244555	0.790215
PF3D7_0401900	1.35005	-0.217935	1.35415	0.244555	0.790215
PF3D7_0111500	-0.588057	4.06704	1.35361	0.244648	0.790215
PF3D7_1458100	-1.22672	-0.170196	1.35312	0.244734	0.790215
PF3D7_0710900	0.716395	1.26763	1.35268	0.24481	0.790215
PF3D7_0611700	-0.57133	9.86095	1.35227	0.244882	0.790215
PF3D7_1239300	-0.656594	4.08548	1.35144	0.245027	0.790215
PF3D7_1148200	-0.907422	0.409789	1.35078	0.245143	0.790215
PF3D7_0310700	0.616864	3.29206	1.34687	0.245826	0.791967
PF3D7_0704800	-0.718895	1.0881	1.34578	0.246017	0.792131
PF3D7_1438000	0.602219	4.04054	1.3444	0.24626	0.79246
PF3D7_0808700	-0.882681	2.74709	1.34247	0.246598	0.792863
PF3D7_0820100	0.654946	2.07264	1.34178	0.246721	0.792863
PF3D7_0316800	-0.570205	9.38529	1.3413	0.246806	0.792863
PF3D7_1413200	-1.189	-0.223814	1.3363	0.247687	0.795242
PF3D7_1106700	0.744196	1.66073	1.33159	0.248522	0.797034
PF3D7_1419600	0.621306	2.97332	1.33157	0.248527	0.797034
PF3D7_1221700	0.752957	1.15819	1.33056	0.248705	0.797154
PF3D7_0801800	0.606381	4.47174	1.32899	0.248985	0.7976
PF3D7_1325000	-0.579193	5.55441	1.32738	0.249272	0.798066
PF3D7_1462800	-0.566737	8.80765	1.32362	0.249944	0.799311
PF3D7_1460600	-1.04495	-0.173863	1.3231	0.250037	0.799311
PF3D7_0805200	1.04497	1.82317	1.32204	0.250226	0.799311
PF3D7_1475800	1.04497	-0.148196	1.32204	0.250226	0.799311
PF3D7_0205800	-0.632002	1.97563	1.31805	0.250942	0.801144
PF3D7_1028600	-0.583854	3.52669	1.31712	0.25111	0.801227
PF3D7_1102300	-0.95462	2.08831	1.31166	0.252094	0.803915
PF3D7_0104500	0.645924	2.58581	1.30855	0.252657	0.805078
PF3D7_1474300	0.741229	0.840657	1.30807	0.252744	0.805078
PF3D7_0826100	0.577945	6.23596	1.3043	0.253429	0.806651
PF3D7_1430700	-0.739355	0.731626	1.30379	0.253523	0.806651
PF3D7_1001300	-0.805134	0.117475	1.30107	0.254019	0.807342
PF3D7_1211500	-0.798179	0.777616	1.30039	0.254143	0.807342
PF3D7_1472300	0.657879	2.55977	1.29982	0.254246	0.807342
PF3D7_1421300	-0.715295	2.17403	1.29873	0.254446	0.807342
PF3D7_0826700	-0.560219	9.94519	1.29868	0.254454	0.807342
PF3D7_1433000	0.615651	3.35995	1.29711	0.254741	0.807799
PF3D7_1120000	0.577128	5.04749	1.2956	0.255018	0.807832
PF3D7_1424700	-1.07195	0.734074	1.2955	0.255037	0.807832
PF3D7_1424000	-0.97968	0.711732	1.29249	0.25559	0.809129
PF3D7_1148000	-0.651521	1.75136	1.28997	0.256054	0.809482
PF3D7_0932400	-0.747482	0.914121	1.28965	0.256113	0.809482
PF3D7_0702400	-0.575123	8.54439	1.28919	0.256197	0.809482
PF3D7_0516100	0.780556	0.536714	1.28815	0.256389	0.809482
PF3D7_1444200	-1.29919	-0.540058	1.28741	0.256525	0.809482
PF3D7_1406200	0.598849	4.48222	1.28659	0.256677	0.809482
PF3D7_1353300	0.648929	2.6951	1.28645	0.256704	0.809482
PF3D7_0502600	-0.595551	4.00888	1.28348	0.257253	0.810763
PF3D7_1121500	-0.743128	0.622027	1.28071	0.257767	0.811396
PF3D7_0913700	0.627168	2.36525	1.28019	0.257864	0.811396
PF3D7_1144300	-0.556285	9.3315	1.28008	0.257884	0.811396
PF3D7_0702900	-0.576224	4.61662	1.2787	0.258141	0.811751
PF3D7_0607000	0.586565	5.09744	1.27706	0.258446	0.812259
PF3D7_1415800	0.695693	2.12708	1.27579	0.258683	0.812554
PF3D7_0608100	-0.634593	2.31651	1.27417	0.258986	0.813051
PF3D7_0935900	-0.624665	8.08336	1.27199	0.259394	0.813881
PF3D7_1453100	1.15871	-0.430995	1.26987	0.259791	0.814485
PF3D7_1344000	0.791757	0.554429	1.26854	0.260041	0.814485
PF3D7_0217600	0.679553	2.11424	1.26785	0.26017	0.814485
PF3D7_0519800	-0.587218	5.0228	1.2673	0.260274	0.814485
PF3D7_1471000	0.77317	1.83478	1.26636	0.260451	0.814485
PF3D7_0302300	-1.00358	2.51426	1.26626	0.26047	0.814485
PF3D7_0628800	-0.697201	1.30231	1.26559	0.260595	0.814485
PF3D7_1314600	-0.702555	1.34554	1.2643	0.260838	0.814796
PF3D7_0502000	-0.751945	1.97813	1.2624	0.261197	0.815467
PF3D7_0407900	-0.677302	1.37224	1.25932	0.26178	0.816112
PF3D7_1214100	-0.662788	1.48034	1.25862	0.261912	0.816112
PF3D7_1328600	0.954653	0.152734	1.25761	0.262103	0.816112
PF3D7_0413800	0.773679	0.237621	1.2576	0.262106	0.816112
PF3D7_1469200	-0.906341	0.4643	1.2575	0.262126	0.816112
PF3D7_1326200	-0.898169	-0.0288778	1.25598	0.262414	0.816559
PF3D7_1472900	-0.601397	3.82198	1.25399	0.262792	0.816797
PF3D7_1355700	0.603009	3.5891	1.25255	0.263065	0.816797
PF3D7_1019000	-0.573745	5.32599	1.25198	0.263175	0.816797
PF3D7_1015000	-0.864926	0.054382	1.25141	0.263283	0.816797
PF3D7_1224700	0.764666	0.891528	1.2509	0.263381	0.816797
PF3D7_1021000	-0.574036	3.55738	1.25015	0.263523	0.816797
PF3D7_0523200	0.754444	1.09386	1.24938	0.26367	0.816797
PF3D7_1442900	0.584416	4.94642	1.24828	0.263881	0.816797
PF3D7_1440500	0.78441	1.44087	1.2477	0.263993	0.816797
PF3D7_1307100	-0.649635	3.66366	1.24757	0.264017	0.816797
PF3D7_1013800	-0.792086	0.719159	1.24724	0.26408	0.816797
PF3D7_1104900	-0.791804	1.22381	1.24649	0.264224	0.816797
PF3D7_1236400	-0.571005	4.99005	1.24176	0.265132	0.818877
PF3D7_1238400	0.816952	0.349484	1.24112	0.265254	0.818877
PF3D7_0409200	0.584507	3.82207	1.23999	0.265472	0.818877
PF3D7_1147900	0.612071	3.53312	1.23997	0.265476	0.818877
PF3D7_0400600	1.18595	-0.607057	1.23783	0.265889	0.819704
PF3D7_0310900	0.648112	1.16136	1.23588	0.266267	0.819896
PF3D7_1350700	-0.617025	2.06964	1.23549	0.266343	0.819896
PF3D7_0913200	0.553401	5.65918	1.23526	0.266386	0.819896
PF3D7_0604000	0.696312	1.2456	1.2317	0.267077	0.82148
PF3D7_1444800	-0.550588	7.21011	1.23111	0.267192	0.82148
PF3D7_1100300	-1.26388	-0.244332	1.22719	0.267954	0.822987
PF3D7_1017000	0.601921	2.46992	1.22652	0.268085	0.822987
PF3D7_1457400	-0.709285	2.38518	1.22538	0.268308	0.822987
PF3D7_0322000	-0.545698	8.02142	1.22514	0.268354	0.822987
PF3D7_1219100	0.610129	3.13924	1.22486	0.26841	0.822987
PF3D7_1205600	-0.585594	3.44525	1.22304	0.268765	0.823631
PF3D7_0909100	1.1046	-0.238273	1.22215	0.268939	0.823715
PF3D7_1329400	-0.6227	3.15699	1.22063	0.269236	0.823823
PF3D7_1130600	0.646879	2.77977	1.22049	0.269265	0.823823
PF3D7_0618700	0.641636	1.88827	1.21761	0.269829	0.824818
PF3D7_0705700	-0.544021	8.12219	1.21732	0.269888	0.824818
PF3D7_1409900	0.570484	4.11039	1.2166	0.270028	0.824818
PF3D7_0517500	-0.921327	-0.00236228	1.21445	0.270452	0.82547
PF3D7_1232900	0.589417	2.70511	1.21355	0.27063	0.82547
PF3D7_1418200	0.717206	0.652635	1.2133	0.270679	0.82547
PF3D7_0728900	0.578359	3.42652	1.21233	0.270871	0.825609
PF3D7_0322200	-1.21768	-0.130918	1.2106	0.271213	0.826206
PF3D7_1408500	0.595751	2.95367	1.20833	0.271664	0.827134
PF3D7_1119300	-0.556298	4.98832	1.20702	0.271923	0.827477
PF3D7_1472600	0.682125	1.20288	1.20518	0.272289	0.828147
PF3D7_1244400	0.6099	2.47239	1.20176	0.272969	0.828872
PF3D7_1312700	0.577414	2.81565	1.2014	0.273042	0.828872
PF3D7_1351000	0.581468	3.89692	1.20002	0.273317	0.828872
PF3D7_0312500	-0.597615	3.318	1.19904	0.273514	0.828872
PF3D7_1447100	0.576648	3.45658	1.19741	0.27384	0.828872
PF3D7_0812100	0.641931	2.70712	1.19643	0.274037	0.828872
PF3D7_1027100	0.595962	3.7861	1.19599	0.274125	0.828872
PF3D7_1321800	0.587129	4.44817	1.19562	0.274199	0.828872
PF3D7_0933300	-0.672613	0.96579	1.19551	0.274221	0.828872
PF3D7_0916800	0.579841	2.50104	1.19452	0.274421	0.828872
PF3D7_0212600	0.859995	0.672453	1.19315	0.274696	0.828872
PF3D7_0914200	0.591116	4.6803	1.19298	0.274729	0.828872
PF3D7_0510000	-0.742107	0.443714	1.19201	0.274924	0.828872
PF3D7_1225000	-0.747897	1.25877	1.19192	0.274943	0.828872
PF3D7_1244900	0.590359	2.43253	1.19164	0.274999	0.828872
PF3D7_1014700	0.611731	3.42187	1.1911	0.275107	0.828872
PF3D7_0725100	0.629019	2.45662	1.1909	0.275149	0.828872
PF3D7_1412900,1	-0.562155	4.85739	1.19008	0.275314	0.828872
PF3D7_1412900,2	-0.562155	4.85739	1.19008	0.275314	0.828872
PF3D7_1228100	-0.593232	2.39409	1.18716	0.275904	0.829767
PF3D7_1430300	-0.600518	4.00486	1.18705	0.275925	0.829767
PF3D7_0903500	0.680944	2.44662	1.18582	0.276175	0.829767
PF3D7_1230900	0.575584	4.18167	1.18425	0.276491	0.829767
PF3D7_1442600	-0.831525	0.715345	1.18416	0.276511	0.829767
PF3D7_1468600	-0.951637	-0.125288	1.18352	0.276641	0.829767
PF3D7_1311000	0.604841	2.43608	1.18332	0.276681	0.829767
PF3D7_1313300	-0.72067	1.39301	1.18281	0.276785	0.829767
PF3D7_1417600	0.569611	4.66894	1.17933	0.277493	0.831209
PF3D7_1024700	-0.608211	2.04655	1.179	0.27756	0.831209
PF3D7_1245200	0.861919	-0.138294	1.17685	0.277998	0.831333
PF3D7_1400100	-0.670679	1.16952	1.17658	0.278054	0.831333
PF3D7_1438900	-0.535521	7.87349	1.17576	0.27822	0.831333
PF3D7_0820800	0.72291	0.694898	1.1753	0.278315	0.831333
PF3D7_0205200	-1.19562	-0.361238	1.17496	0.278384	0.831333
PF3D7_0915600	-0.783468	1.50403	1.17447	0.278486	0.831333
PF3D7_0627200	-0.67716	0.624875	1.17321	0.278743	0.831333
PF3D7_1112400	-0.579439	2.54331	1.1729	0.278805	0.831333
PF3D7_0711400	0.603126	2.1611	1.16998	0.279405	0.831333
PF3D7_0418700	0.600989	3.41633	1.16933	0.279539	0.831333
PF3D7_1203600	0.637482	1.6348	1.16723	0.27997	0.831333
PF3D7_1101700	1.24533	-0.269603	1.16564	0.280298	0.831333
PF3D7_1016700	0.611709	3.97699	1.16498	0.280434	0.831333
PF3D7_1217800	0.961063	-0.104654	1.16473	0.280487	0.831333
PF3D7_1025000	-0.638049	2.96864	1.16442	0.28055	0.831333
PF3D7_1146200	0.726012	0.960525	1.1643	0.280576	0.831333
PF3D7_1436100	0.684561	1.7042	1.16417	0.280603	0.831333
PF3D7_1038100	0.649993	2.34347	1.16411	0.280615	0.831333
PF3D7_0917800	-0.733381	2.2629	1.16322	0.280798	0.831333
PF3D7_1234400	-1.3597	-0.314338	1.16304	0.280836	0.831333
PF3D7_0929800	-1.3597	-0.698764	1.16304	0.280836	0.831333
PF3D7_1361300	-1.3597	-0.508698	1.16304	0.280836	0.831333
PF3D7_1307000	-0.571936	3.66351	1.16091	0.281277	0.831355
PF3D7_0806100	-0.665971	1.61202	1.16085	0.281288	0.831355
PF3D7_1128300	-0.78861	0.595533	1.16081	0.281298	0.831355
PF3D7_1324300	-0.627144	2.44457	1.16011	0.281443	0.831355
PF3D7_1445100	0.573024	4.67382	1.15883	0.281707	0.831355
PF3D7_1436500	-0.729996	0.531736	1.15875	0.281726	0.831355
PF3D7_1436600	-0.555291	4.3793	1.15706	0.282075	0.831953
PF3D7_0203800	-0.770287	0.7255	1.1532	0.282881	0.833894
PF3D7_0828500	-0.583788	2.18786	1.15158	0.283218	0.834452
PF3D7_0518400	-1.3503	-0.470306	1.14865	0.283831	0.835463
PF3D7_0318300	-0.571434	4.19186	1.14845	0.283874	0.835463
PF3D7_1331800	-0.545729	7.38219	1.14783	0.284004	0.835463
PF3D7_1124300	-0.539274	5.29963	1.14483	0.284633	0.836474
PF3D7_0521700	-0.59263	3.16212	1.14478	0.284644	0.836474
PF3D7_1112000	0.557104	3.09909	1.14298	0.285023	0.836671
PF3D7_0910400	-0.650049	1.38164	1.14237	0.285152	0.836671
PF3D7_1471800	-1.17797	-0.428043	1.14228	0.28517	0.836671
PF3D7_1367100	-0.591971	3.5466	1.14142	0.285353	0.836671
PF3D7_1442100	0.55272	3.63798	1.14095	0.285451	0.836671
PF3D7_1140200	-0.557905	3.44018	1.13953	0.285752	0.837121
PF3D7_1239600	0.794438	1.22683	1.13765	0.286149	0.837188
PF3D7_0824500	0.548176	3.43101	1.13759	0.286162	0.837188
PF3D7_1402900	-0.965504	0.0264384	1.13661	0.286371	0.837188
PF3D7_1442400	0.615666	2.0969	1.13491	0.286731	0.837188
PF3D7_1303500	0.63175	2.73693	1.13473	0.286769	0.837188
PF3D7_0520500	-0.59593	1.85088	1.13452	0.286813	0.837188
PF3D7_1014200	-1.13997	-0.274075	1.13383	0.28696	0.837188
PF3D7_1220000	-1.13997	-0.444205	1.13383	0.28696	0.837188
PF3D7_1409200,1	0.836894	0.106247	1.12983	0.287811	0.838805
PF3D7_1409200,2	0.836894	0.106247	1.12983	0.287811	0.838805
PF3D7_0315500	0.601987	1.48527	1.12716	0.288381	0.840035
PF3D7_1360900	-0.543058	3.70826	1.12485	0.288877	0.840663
PF3D7_0722200	-0.942239	0.582106	1.12327	0.289216	0.840663
PF3D7_0519100	-0.598327	1.65384	1.12286	0.289304	0.840663
PF3D7_0317700	-0.55185	4.3388	1.12091	0.289722	0.840663
PF3D7_1034500	0.569642	2.47059	1.12081	0.289744	0.840663
PF3D7_0909900	-0.588675	3.13188	1.1205	0.289811	0.840663
PF3D7_0315400	-0.619343	1.38939	1.11974	0.289975	0.840663
PF3D7_0308200	-0.575567	4.13012	1.11932	0.290065	0.840663
PF3D7_0115000	-1.33056	-0.396211	1.11866	0.290208	0.840663
PF3D7_0819900	0.529159	4.41443	1.11839	0.290266	0.840663
PF3D7_0918200	-0.553142	4.83785	1.11819	0.290308	0.840663
PF3D7_1415300	0.538509	4.14249	1.11764	0.290427	0.840663
PF3D7_1461400	-0.639957	1.72748	1.11715	0.290533	0.840663
PF3D7_1234600	0.581683	1.63259	1.11619	0.290741	0.840663
PF3D7_1205400	0.591971	2.26081	1.11489	0.291021	0.840663
PF3D7_1330400,1	0.53604	4.54849	1.11398	0.291218	0.840663
PF3D7_1330400,2	0.53604	4.54849	1.11398	0.291218	0.840663
PF3D7_0705500	0.576847	4.42684	1.11336	0.291353	0.840663
PF3D7_0807600	0.547558	4.52753	1.11289	0.291455	0.840663
PF3D7_0407600	-1.40874	-0.522735	1.11223	0.291597	0.840663
PF3D7_1432900	-0.719139	1.53383	1.11167	0.291719	0.840663
PF3D7_1253100	0.684969	3.5125	1.10795	0.292529	0.842567
PF3D7_1200500	0.921592	0.918626	1.10586	0.292983	0.843446
PF3D7_0802500	-0.613313	2.37742	1.10494	0.293184	0.843593
PF3D7_0624500	-0.605637	1.32816	1.1031	0.293587	0.843658
PF3D7_0111700	-1.68618	-0.488151	1.10279	0.293654	0.843658
PF3D7_0925100	-1.68618	-0.703918	1.10279	0.293654	0.843658
PF3D7_0916700	0.525791	6.88538	1.09944	0.294389	0.843874
PF3D7_0933600	-0.552875	4.19361	1.0994	0.294398	0.843874
PF3D7_0915800	-1.00729	-0.169889	1.09577	0.295197	0.843874
PF3D7_1014500	-0.87077	0.554314	1.09454	0.295467	0.843874
PF3D7_1123600	-0.603929	2.65208	1.09406	0.295574	0.843874
PF3D7_0808600	0.806762	3.93944	1.09401	0.295584	0.843874
PF3D7_1127500	-0.556857	2.43673	1.09348	0.295701	0.843874
PF3D7_0802400	0.574248	3.18162	1.09336	0.295729	0.843874
PF3D7_0616100	0.691742	1.6254	1.09222	0.29598	0.843874
PF3D7_0520700	-0.641842	2.04088	1.09086	0.29628	0.843874
PF3D7_1431000	-0.643553	1.25422	1.09045	0.296371	0.843874
PF3D7_1211400	-0.517497	7.23822	1.09029	0.296407	0.843874
PF3D7_1141400	-0.551053	2.29472	1.08968	0.296542	0.843874
PF3D7_0215200	-1.65916	-0.55369	1.08826	0.296858	0.843874
PF3D7_0420500	-1.65916	-0.724994	1.08826	0.296858	0.843874
PF3D7_1238200	-1.65916	-0.710079	1.08826	0.296858	0.843874
PF3D7_1400600	-1.65916	-0.0376482	1.08826	0.296858	0.843874
PF3D7_1357200	-0.579688	2.13173	1.08675	0.297193	0.843874
PF3D7_1218300	-0.715341	1.5827	1.08651	0.297245	0.843874
PF3D7_1467400	-0.635192	1.5116	1.08611	0.297335	0.843874
PF3D7_1425800	-0.682112	0.815537	1.08573	0.29742	0.843874
PF3D7_0420600	0.683603	0.509464	1.08424	0.297752	0.843874
PF3D7_1458500	-0.634779	1.47741	1.08294	0.29804	0.843874
PF3D7_1237500	0.592337	3.03673	1.08221	0.298204	0.843874
PF3D7_1316400	-0.874598	0.159263	1.0804	0.298609	0.843874
PF3D7_1434400	-0.798644	0.580926	1.08024	0.298644	0.843874
PF3D7_0307400	-0.557932	2.33886	1.07974	0.298755	0.843874
PF3D7_0727600	-0.714596	0.696598	1.07922	0.298873	0.843874
PF3D7_0934900	1.10453	0.133738	1.07884	0.298957	0.843874
PF3D7_0933400	-0.998936	-0.287189	1.07843	0.299049	0.843874
[truncated: 3,656 more rows]
