# Supplementary material for: RNA polymerase III is involved in regulating Plasmodium falciparum virulence
Source: eLife. 2024 Jun 26;13:RP95879. doi: 10.7554/eLife.95879 (PMC11208047; doi:10.7554/eLife.95879)
Supplement: Figure 3—source data 3. [file elife-95879-fig3-data3.xls]

## Sheet: Figure 3-source data
Figure 3-source data for Co-IP MS analysis comparing cytoplasmic PfMaf1 to nuclear PfMaf1-binding proteins.
Figure S4-source data for Co-IP MS analysis. Cytoplasmic PfMaf1 and nuclear PfMaf1-binding proteins were identified. Tabs show proteins enriched in cytoplasmic and nuclear fractions as well as protein exclusive to cytoplasmic and nuclear fractions binding to PfMaf1. Gene & Synonyms, Ratio, Log2(Ratio), Adj. p-value, CV %, Dist. pept. used, Pept. used, Pep. filter, Distrib. dist. pep. in replic., …

## Sheet: Summary
Design-based Quantification of Proteins
Source
Location in myProMS :	Maf1 interactors - Plasmodium Falciparum > IP 17/10/2022 - Plasmo F + Human > Label Free Quantification
Peptide XIC extraction engine :	MassChroQ (v2.2.21)
Labeling :	Label-free

## Sheet: Cytoplasmic PfMaf1
Significant and unique proteins found in the PfMaf1 cytoplasmic fractions and not in the control cytoplasmic fractions.
185/2063 proteins	Gene & Synonyms	Ab Cytoplasm/Control Cytoplasm								Total peptides in set	MW (kDa)	Description	Species
		Ratio	Log2(Ratio)	Adj. p-value	CV %	Dist. pept. used	Pept. used	Pep. filter	Distrib. dist. pep. in replic.
P02549	SPTA1,SPTA	4.43734	2.14969	0	1.35825	153	1549	131	132, 141, 131, 144, 138/93, 80, 105, 111, 107	1989	280	Spectrin alpha chain, erythrocytic 1	Homo sapiens
P11277	SPTB,SPTB1	4.13354	2.04738	0	1.64577	114	1189	96	107, 107, 96, 107, 107/74, 68, 78, 83, 71	1570	246.5	Spectrin beta chain, erythrocytic	Homo sapiens
P16157	ANK1,ANK	3.21355	1.68417	5.3322e-119	3.07924	57	536	47	47, 50, 47, 56, 48/31, 32, 45, 41, 40	681	206.3	Ankyrin-1	Homo sapiens
Q8IIJ8	PF11_0175,PF3D7_1116800	2.45741	1.29714	1.54295e-79	3.81141	42	370	34	34, 39, 37, 42, 37/28, 27, 34, 30, 27	464	102.9	Heat shock protein 101	Plasmodium falciparum
P11171	EPB41,E41P	5.22963	2.38671	6.11776e-63	3.61884	20	199	17	18, 17, 20, 18, 20/15, 9, 16, 17, 14	276	97	Protein 4.1	Homo sapiens
Q8I2X4	PF3D7_0917900	2.32727	1.21864	1.05293e-30	6.69569	21	196	17	19, 20, 17, 18, 21/12, 16, 14, 9, 11	238	72.4	Heat shock protein 70	Plasmodium falciparum
O75955	FLOT1	2.493	1.31789	9.56252e-34	5.92424	22	167	16	16, 19, 17, 19, 18/13, 1, 14, 19, 13	218	47.4	Flotillin-1	Homo sapiens
P02730	SLC4A1,AE1,DI,EPB3	2.89782	1.53497	7.90013e-46	4.93322	20	202	15	17, 15, 18, 18, 20/17, 10, 18, 18, 15	244	101.8	Band 3 anion transport protein	Homo sapiens
Q8ILZ1	PF3D7_1410400	2.07956	1.05628	7.29275e-30	6.68723	28	185	14	14, 23, 24, 23, 22/15, 15, 11, 12, 10	258	90.1	Rhoptry-associated protein 1	Plasmodium falciparum
Q8I5H4	PF3D7_1224300,PFL1170w	8.78723	3.13541	5.84252e-38	4.66878	16	124	14	15, 15, 15, 14, 14/8, 11, 8, 4, 4	186	97.2	Polyadenylate-binding protein	Plasmodium falciparum
Q14254	FLOT2,ESA1,M17S1	2.1893	1.13047	1.80747e-26	6.65753	15	127	12	12, 14, 14, 14, 13/12, 1, 8, 10, 9	172	47.1	Flotillin-2	Homo sapiens
Q8IJS7	PF10_0115,PF3D7_1011800	2.51221	1.32896	1.53708e-11	11.7752	18	101	12	12, 14, 14, 13, 12/4, 13, 5, 1, 2	180	131.6	PRE-binding protein	Plasmodium falciparum
Q8IB24	PF08_0054	2.18111	1.12506	3.48212e-14	10.8355	14	134	11	11, 13, 12, 12, 12/7, 7, 10, 11, 7	178	73.9	Heat shock protein 70	Plasmodium falciparum
O97313	MAL3P7.35,PFC1020c	3.52054	1.81579	1.08507e-17	8.90204	15	113	11	12, 13, 11, 13, 13/5, 7, 11, 8, 5	146	30	40S ribosomal protein S3a	Plasmodium falciparum
Q8IKH8	PF14_0627,PF3D7_1465900	3.17958	1.66884	4.53174e-15	9.92139	14	106	11	11, 13, 12, 11, 12/5, 12, 9, 7, 6	116	24.7	40S ribosomal protein S3	Plasmodium falciparum
P16452	EPB42,E42P	2.4712	1.30521	7.61887e-29	6.39876	16	140	10	13, 10, 14, 13, 16/10, 9, 12, 10, 9	186	77	Protein 4.2	Homo sapiens
C0H4Y6	PF3D7_0827900	2.04916	1.03503	3.64882e-18	8.74514	14	113	10	10, 11, 10, 14, 14/9, 8, 11, 8, 9	141	55.5	Protein disulfide-isomerase	Plasmodium falciparum
Q8ILL3	PF14_0230,PF3D7_1424100	3.52944	1.81944	5.49766e-17	9.23977	12	112	10	10, 10, 11, 11, 10/8, 10, 12, 9, 10	129	34	60S ribosomal protein L5, putative	Plasmodium falciparum
Q8II24	PF3D7_1134000	5.71713	2.51529	1.07762e-21	6.86736	14	88	10	13, 14, 10, 12, 13/4, 9, 7, 3, 3	210	73.3	Heat shock protein 70	Plasmodium falciparum
A0A5K1K8Y8	PF3D7_1347500	4.9523	2.3081	6.84384e-22	7.46852	14	113	9	12, 12, 9, 10, 13/8, 6, 9, 8, 6	143	42.2	DNA/RNA-binding protein Alba 4	Plasmodium falciparum
Q8II61	PF11_0313,PF3D7_1130200	3.15086	1.65574	1.52036e-14	10.2601	12	108	9	12, 12, 11, 9, 9/8, 10, 9, 9, 9	128	35	60S acidic ribosomal protein P0	Plasmodium falciparum
Q8ILA1	PF3D7_1436300	5.64888	2.49797	1.22531e-39	3.70225	12	92	9	11, 12, 11, 9, 11/8, 3, 9, 9, 9	168	112.4	Translocon component PTEX150	Plasmodium falciparum
Q8IIU8	PF11_0065,PF3D7_1105400	2.34024	1.22665	1.21461e-11	11.8781	11	102	8	8, 9, 11, 9, 9/6, 10, 8, 6, 4	123	29.8	40S ribosomal protein S4	Plasmodium falciparum
Q8I431	PF3D7_0507100	4.54364	2.18385	5.73467e-21	7.3082	16	97	8	15, 11, 11, 11, 8/8, 9, 8, 5, 4	125	46.2	60S ribosomal protein L4	Plasmodium falciparum
Q00013	MPP1,DXS552E,EMP55	2.31131	1.20871	2.57964e-08	14.4719	12	78	8	10, 12, 8, 9, 9/5, 7, 6, 5, 7	108	52.3	55 kDa erythrocyte membrane protein	Homo sapiens
C6KT34	PFF0940c	3.07839	1.62218	7.72662e-14	9.4476	12	72	8	10, 12, 8, 10, 9/0, 10, 0, 0, 2	180	92.4	Cell division cycle protein 48 homologue, putative	Plasmodium falciparum
Q08495	DMTN,DMT,EPB49	6.26171	2.64656	4.7992e-30	4.26881	10	71	8	9, 9, 8, 8, 9/8, 6, 5, 6, 3	117	45.5	Dematin	Homo sapiens
Q8ILL2	PF14_0231,PF3D7_1424400	3.28058	1.71395	1.8875e-09	12.9073	11	70	8	10, 10, 8, 8, 8/4, 9, 6, 3, 4	85	32.7	60S ribosomal protein L7a	Plasmodium falciparum
Q8I2T2	PF3D7_0922100	1000	1000			9	41	8	8, 8, 9, 8, 8/0, 0, 0, 0, 0	41	182.1	Ubiquitin-like protein, putative	Plasmodium falciparum
A0A143ZZK9	PF3D7_1211900	2.13225	1.09238	5.49766e-17	8.63034	12	88	7	7, 12, 11, 11, 11/6, 8, 8, 8, 6	118	140.3	Non-SERCA-type Ca2+ -transporting P-ATPase	Plasmodium falciparum
Q8IAX8	PF3D7_0814200	10.857	3.44056	1.97675e-25	5.74332	8	81	7	8, 8, 8, 8, 7/7, 6, 7, 5, 4	129	27.3	DNA/RNA-binding protein Alba 1	Plasmodium falciparum
P35612	ADD2,ADDB	4.51844	2.17583	6.99812e-21	6.40438	10	70	7	9, 9, 7, 9, 10/5, 4, 3, 5, 3	122	80.9	Beta-adducin	Homo sapiens
P35611	ADD1,ADDA	4.9198	2.2986	1.38356e-16	7.89314	11	68	7	8, 10, 7, 10, 11/4, 3, 2, 7, 3	123	81	Alpha-adducin	Homo sapiens
Q8IHR4	PF3D7_1145400	2.59314	1.3747	3.66423e-05	19.7487	12	65	7	9, 8, 7, 8, 9/2, 10, 4, 2, 1	130	96.4	Dynamin-like protein	Plasmodium falciparum
Q8I5Y3	PF3D7_1206200	3.58419	1.84165	8.40552e-09	13.3572	10	64	7	8, 8, 7, 10, 8/5, 9, 6, 1, 2	85	116	Eukaryotic translation initiation factor 3 subunit C	Plasmodium falciparum
O97250	PF3D7_0307200	3.928	1.97379	8.29198e-17	8.22301	8	75	6	6, 7, 7, 6, 7/4, 6, 6, 6, 3	84	30.5	60S ribosomal protein L7, putative	Plasmodium falciparum
Q8IKM5	PF14_0579,PF3D7_1460700	3.70591	1.88983	1.52036e-14	9.08683	8	68	6	7, 8, 7, 6, 8/4, 6, 7, 5, 6	88	16.7	60S ribosomal protein L27	Plasmodium falciparum
P28289	TMOD1,D9S57E,TMOD	5.34852	2.41914	9.73423e-23	5.64896	9	66	6	6, 6, 8, 9, 8/4, 4, 3, 7, 5	121	40.6	Tropomodulin-1	Homo sapiens
Q8I3R0	PF3D7_0520000	3.95595	1.98403	6.73549e-14	9.04934	9	61	6	6, 8, 7, 8, 7/3, 6, 6, 5, 5	84	22.1	40S ribosomal protein S9, putative	Plasmodium falciparum
Q8IJW4	PF3D7_1007900	4.98818	2.31851	6.6874e-14	8.83251	7	58	6	7, 7, 6, 6, 7/2, 6, 5, 2, 2	101	63.1	Eukaryotic translation initiation factor 3 subunit D	Plasmodium falciparum
Q8IKR1	PF3D7_1456800	2.06589	1.04676	4.36233e-09	12.3153	10	53	6	8, 8, 6, 7, 7/2, 5, 6, 2, 2	81	76.4	H(+)-exporting diphosphatase	Plasmodium falciparum
Q8IC14		1000	1000			17	51	6	6, 10, 10, 12, 9/0, 1, 0, 0, 0	51	194.4	Uncharacterized protein	Plasmodium falciparum
Q8ILQ3	PF3D7_1419700	8.92468	3.1578	2.45779e-18	6.11543	7	50	6	7, 7, 7, 7, 6/2, 3, 5, 3, 3	78	59.7	eIF3h_C domain-containing protein	Plasmodium falciparum
Q8IJN9	PF3D7_1015600	4.77927	2.25679	1.37037e-08	12.8176	8	50	6	6, 7, 7, 7, 6/2, 5, 3, 4, 3	92	62.6	Heat shock protein 60	Plasmodium falciparum
Q8IBT2	PF3D7_0716800	2.77268	1.47128	4.38595e-06	16.5955	7	46	6	6, 6, 6, 7, 6/1, 6, 3, 0, 1	79	37.3	Eukaryotic translation initiation factor 3 subunit I	Plasmodium falciparum
Q96PL5	ERMAP,RD,SC	1000	1000			8	42	6	6, 7, 6, 7, 7/0, 0, 1, 1, 0	42	52.6	Erythroid membrane-associated protein	Homo sapiens
Q8ILT5	PF14_0159	1000	1000			9	38	6	7, 8, 6, 6, 8/0, 2, 0, 0, 1	38	110.6	Protein SEY1 homolog	Plasmodium falciparum
Q8IE67	PF13_0143	2.8141	1.49267	2.43564e-08	11.9257	7	38	6	7, 6, 6, 6, 6/0, 5, 2, 0, 0	80	49.4	Phosphoribosylpyrophosphate synthetase	Plasmodium falciparum
P11166	SLC2A1,GLUT1	2.53723	1.34325	2.44005e-17	8.20586	7	79	5	6, 7, 5, 7, 7/5, 3, 7, 5, 6	103	54.1	Solute carrier family 2, facilitated glucose transporter member 1	Homo sapiens
Q8IJ76	PF3D7_1033200	2.01624	1.01167	2.40853e-11	11.2502	11	73	5	9, 9, 5, 7, 8/6, 8, 5, 5, 4	97	38.9	Early transcribed membrane protein 10.2	Plasmodium falciparum
Q8IET7	PF3D7_1302800	3.95029	1.98196	1.16538e-11	11.0295	8	70	5	8, 8, 5, 8, 6/6, 7, 7, 5, 3	81	22.5	40S ribosomal protein S7	Plasmodium falciparum
Q8IAX5	PF3D7_0813900	2.84773	1.50981	9.9866e-08	15.0691	8	70	5	8, 7, 5, 8, 8/6, 8, 7, 6, 5	81	16.3	40S ribosomal protein S16, putative	Plasmodium falciparum
Q8IDB0	PF3D7_1358800	3.71101	1.89181	1.11591e-11	10.9145	7	68	5	6, 7, 6, 6, 5/5, 6, 6, 5, 3	77	17.3	40S ribosomal protein S15	Plasmodium falciparum
A0A5K1K8V8	PF3D7_1338200	3.98238	1.99363	1.21331e-15	8.39634	6	66	5	6, 5, 6, 6, 6/4, 5, 6, 3, 2	79	25.5	60S ribosomal protein L6, putative	Plasmodium falciparum
Q8I502	PF3D7_1242700,PFL2055w	3.44955	1.78641	1.0889e-13	9.11407	8	61	5	5, 6, 6, 8, 8/3, 4, 5, 4, 3	94	16.1	40S ribosomal protein S17, putative	Plasmodium falciparum
Q8IL02	PF14_0448,PF3D7_1447000	5.06103	2.33943	6.14437e-15	8.15997	7	56	5	5, 6, 5, 6, 7/4, 5, 7, 6, 1	71	30	40S ribosomal protein S5	Plasmodium falciparum
Q8I2X3	PF3D7_0918000	3.30058	1.72272	3.92399e-15	8.12499	6	56	5	5, 6, 5, 5, 6/4, 6, 5, 5, 2	73	44.6	Acid phosphatase	Plasmodium falciparum
Q8I3T1	PF3D7_0517700	2.93894	1.5553	2.18111e-08	12.9938	10	52	5	6, 10, 7, 8, 5/1, 9, 0, 0, 0	91	84.1	Eukaryotic translation initiation factor 3 subunit B	Plasmodium falciparum
Q8IM10	PF14_0083,PF3D7_1408600	4.00076	2.00028	1.96185e-12	9.30161	6	50	5	5, 6, 5, 5, 6/4, 4, 4, 4, 4	61	25.1	40S ribosomal protein S8	Plasmodium falciparum
C0H4L6	PF3D7_0706500	1000	1000			11	43	5	5, 11, 10, 7, 8/0, 2, 0, 0, 0	43	196.6	Uncharacterized protein	Plasmodium falciparum
Q8IJX3	PF3D7_1006800	14.8821	3.8955	5.06412e-20	4.84457	5	43	5	5, 5, 5, 5, 5/3, 1, 4, 2, 2	69	29.5	Single-strand telomeric DNA-binding protein GBP2, putative	Plasmodium falciparum
Q8IIR7	PF3D7_1108600	4.55519	2.18751	1.77366e-11	9.17389	6	41	5	6, 6, 5, 6, 6/2, 3, 4, 2, 1	66	39.4	Endoplasmic reticulum-resident calcium binding protein	Plasmodium falciparum
Q8I2Y5	PF3D7_0916700	5.37239	2.42556	2.71518e-13	7.56525	6	40	5	6, 5, 5, 5, 5/3, 4, 1, 1, 0	78	45.1	RNA-binding protein musashi, putative	Plasmodium falciparum
Q8IB03	PF3D7_0816600	1000	1000			14	39	5	5, 8, 6, 8, 9/0, 3, 0, 0, 0	39	122.5	Chaperone protein ClpB1	Plasmodium falciparum
Q8IIU5	PF3D7_1105800	1000	1000			8	35	5	6, 5, 6, 7, 6/0, 0, 1, 0, 0	35	30.7	Uncharacterized protein	Plasmodium falciparum
Q8IFP2	PF3D7_0422400	3.80342	1.9273	3.57229e-18	7.25505	7	66	4	2, 7, 7, 7, 6/4, 4, 6, 6, 6	82	19.7	40S ribosomal protein S19	Plasmodium falciparum
P06753	TPM3	6.24989	2.64383	1.97245e-23	5.38948	7	64	4	4, 7, 7, 7, 7/3, 2, 5, 7, 2	88	33	Tropomyosin alpha-3 chain	Homo sapiens
O77395	PF3D7_0316800	2.45992	1.29861	3.51859e-07	15.5018	6	60	4	5, 4, 5, 6, 5/5, 4, 4, 4, 4	71	14.9	40S ribosomal protein S15A, putative	Plasmodium falciparum
Q8II73	PF3D7_1129000	5.46899	2.45127	8.42327e-21	5.03146	6	48	4	6, 4, 4, 6, 6/4, 1, 4, 5, 3	69	36.6	Spermidine synthase	Plasmodium falciparum
C0H4V6	PF3D7_0818200	2.11097	1.07791	6.76491e-05	19.7608	6	46	4	5, 4, 4, 6, 4/4, 4, 5, 2, 3	53	30.2	14-3-3 protein I	Plasmodium falciparum
Q8IDR9	PF3D7_1342000	2.6602	1.41153	2.46584e-05	18.3964	6	45	4	6, 6, 4, 5, 6/1, 6, 3, 1, 2	74	35.4	40S ribosomal protein S6	Plasmodium falciparum
Q8IJX8	PF10_0063,PF3D7_1006200	11.4839	3.52154	4.68366e-16	6.50049	5	43	4	4, 5, 4, 5, 5/3, 4, 4, 2, 3	62	12	DNA/RNA-binding protein Alba 3	Plasmodium falciparum
Q8I1S2	PF3D7_0416500	1000	1000			6	40	4	6, 6, 4, 6, 6/0, 0, 1, 1, 0	40	46.5	Repressor of RNA polymerase III transcription MAF1	Plasmodium falciparum
Q8IDH5	PF3D7_1352500	2.68468	1.42475	5.79605e-08	12.8582	5	39	4	3, 4, 3, 5, 3/4, 5, 4, 4, 4	49	24	Thioredoxin-related protein, putative	Plasmodium falciparum
C0H4A6	PF3D7_0415900	2.64896	1.40543	0.000219801	21.1607	5	39	4	5, 5, 4, 5, 4/3, 5, 3, 2, 3	49	24.1	Ribosomal protein L15	Plasmodium falciparum
Q8IJC6	PF10_0272,PF3D7_1027800	5.7435	2.52193	4.07275e-07	13.9552	5	37	4	5, 4, 4, 4, 4/3, 4, 4, 3, 2	43	44.2	60S ribosomal protein L3	Plasmodium falciparum
Q8IBQ5	PF3D7_0719700	2.82958	1.50059	2.58907e-08	12.1176	5	37	4	5, 5, 4, 5, 4/2, 2, 4, 4, 2	44	16.5	40S ribosomal protein S10, putative	Plasmodium falciparum
Q8I5M3	PF3D7_1218500	2.1077	1.07567	0.00464958	28.0997	7	36	4	5, 7, 7, 4, 6/1, 4, 2, 0, 0	50	122.8	Dynamin-like protein, putative	Plasmodium falciparum
Q8IJN7	ENO,PF10_0155	2.89411	1.53312	0.000121444	19.1823	6	32	4	4, 5, 5, 4, 4/2, 4, 1, 2, 1	45	48.7	Enolase	Plasmodium falciparum
Q8III6	PF3D7_1118200	2.5853	1.37033	0.000296359	20.5243	5	30	4	4, 5, 5, 5, 4/1, 3, 2, 1, 0	80	108.5	Heat shock protein 90, putative	Plasmodium falciparum
Q8I544	PF3D7_1237900	1000	1000			8	28	4	4, 5, 8, 6, 4/0, 0, 0, 0, 0	28	140.9	Uncharacterized protein	Plasmodium falciparum
Q8IFP5	PF3D7_0422100	1000	1000			6	23	4	5, 5, 4, 4, 4/0, 1, 0, 0, 0	23	44.9	Transmembrane emp24 domain-containing protein, putative	Plasmodium falciparum
Q8I5C6	PF3D7_1229300	6.06405	2.60028	3.07143e-10	6.57035	5	23	4	5, 4, 5, 4, 0/0, 4, 0, 1, 0	103	117.5	Uncharacterized protein	Plasmodium falciparum
Q8IDS6	PF3D7_1341200	4.03941	2.01414	4.4782e-14	8.49223	6	53	3	4, 5, 3, 5, 6/4, 5, 5, 3, 4	62	21.7	60S ribosomal protein L18a	Plasmodium falciparum
Q8ILE8	PF14_0296,PF3D7_1431700	4.23738	2.08317	9.24035e-09	12.0212	7	43	3	3, 5, 5, 6, 4/5, 2, 5, 5, 3	49	19.3	60S ribosomal protein L14, putative	Plasmodium falciparum
Q8IDX8	PF3D7_1335100	3.69037	1.88377	2.10574e-10	10.139	6	42	3	5, 5, 5, 6, 3/3, 2, 4, 4, 0	65	41.3	Merozoite surface protein 7	Plasmodium falciparum
Q8I3T8	PF3D7_0517000	2.58446	1.36986	2.37859e-11	9.28781	5	41	3	5, 4, 4, 4, 2/3, 4, 4, 4, 4	56	18.1	60S ribosomal protein L12, putative	Plasmodium falciparum
Q8IJZ7	PF10_0043,PF3D7_1004000	4.0284	2.01021	4.78853e-07	14.3272	5	39	3	4, 5, 5, 3, 4/4, 4, 4, 4, 2	45	23.8	60S ribosomal protein L13, putative	Plasmodium falciparum
Q8IE85	PF3D7_1323100	4.23599	2.0827	3.57875e-11	9.029	6	38	3	5, 4, 4, 5, 3/3, 3, 2, 4, 5	45	21.6	60S ribosomal protein L6, putative	Plasmodium falciparum
O77381	PF3D7_0317600	3.92515	1.97275	6.80118e-08	12.5606	6	37	3	6, 6, 4, 3, 5/2, 3, 4, 2, 2	41	18.8	40S ribosomal protein S11, putative	Plasmodium falciparum
Q8IIQ7	PF3D7_1110400	2.5455	1.34795	6.57335e-07	13.9012	6	36	3	6, 5, 5, 6, 3/0, 6, 1, 0, 0	64	173.9	RNA-binding protein, putative	Plasmodium falciparum
Q8IKJ1	PF3D7_1464600	2.26348	1.17854	1.577e-06	13.9122	6	31	3	4, 5, 5, 4, 3/0, 4, 3, 2, 1	70	170.5	Serine/threonine protein phosphatase UIS2, putative	Plasmodium falciparum
Q8I546	PF3D7_1237700	2.25204	1.17124	2.47911e-05	17.1242	4	31	3	3, 4, 3, 3, 4/3, 4, 3, 2, 2	40	23.7	DUF4149 domain-containing protein	Plasmodium falciparum
Q8IKN7	PF3D7_1459400	3.3184	1.73049	1.49403e-06	13.6451	5	30	3	4, 5, 3, 4, 4/0, 2, 2, 0, 1	51	40.1	Uncharacterized protein	Plasmodium falciparum
Q8IEM3	PF3D7_1309100	4.47319	2.1613	7.34718e-05	18.3858	3	29	3	3, 3, 3, 3, 3/3, 3, 3, 3, 2	34	19.2	60S ribosomal protein L24, putative	Plasmodium falciparum
Q8IJV6	PF3D7_1008900	4.41824	2.14347	1.89136e-07	11.9757	5	29	3	5, 5, 3, 5, 4/2, 3, 2, 0, 0	51	27.6	Adenylate kinase 1	Plasmodium falciparum
Q8I2R8	PF3D7_0923900	3.05318	1.61031	5.96181e-07	12.6382	5	29	3	5, 4, 4, 4, 3/0, 3, 4, 0, 0	39	23	Polyadenylate-binding protein 2, putative	Plasmodium falciparum
P09493	TPM1,C15orf13,TMSA	1000	1000			6	26	3	3, 6, 6, 5, 5/0, 0, 0, 1, 0	26	32.7	Tropomyosin alpha-1 chain	Homo sapiens
Q8IAQ8	PF3D7_0806800	2.21257	1.14572	0.000235272	19.5372	4	26	3	3, 3, 3, 3, 3/2, 2, 3, 1, 3	35	123	V-type proton ATPase subunit a, putative	Plasmodium falciparum
P20073	ANXA7,ANX7,SNX,OK/SW-cl.95	2.38663	1.25497	2.60741e-06	13.6696	3	25	3	3, 3, 3, 3, 3/2, 3, 3, 1, 1	38	52.7	Annexin A7	Homo sapiens
O97247	PF3D7_0306800	2.0613	1.04356	0.00435752	26.4327	5	25	3	3, 4, 3, 4, 3/2, 2, 1, 2, 1	47	59.2	CCT-beta	Plasmodium falciparum
A0A5K1K910	PF3D7_1344800	1000	1000			6	24	3	3, 5, 4, 5, 3/1, 0, 1, 1, 1	24	43.3	Aspartate carbamoyltransferase	Plasmodium falciparum
Q8I0V3	PF3D7_1232100	8.72988	3.12596	1.00993e-06	11.9192	5	24	3	4, 4, 3, 4, 4/0, 2, 2, 0, 1	115	81.5	60 kDa chaperonin	Plasmodium falciparum
O77364	PF3D7_0312800	3.79941	1.92578	0.000114892	17.7517	4	24	3	3, 4, 3, 3, 3/2, 2, 2, 1, 1	29	14.8	60S ribosomal protein L26, putative	Plasmodium falciparum
C0H570	PF3D7_0929200	1000	1000			6	23	3	4, 5, 3, 4, 4/0, 2, 0, 0, 0	23	33.6	RNA-binding protein, putative	Plasmodium falciparum
Q8I2W2	PF3D7_0919100	2.93269	1.55223	1.62849e-05	14.7464	3	23	3	3, 3, 3, 3, 3/0, 2, 1, 0, 1	28	43.3	DnaJ protein, putative	Plasmodium falciparum
Q8I3R6	PF3D7_0519400	2.84475	1.5083	0.00123367	22.109	3	22	3	3, 3, 3, 3, 1/1, 2, 2, 1, 1	37	15.4	40S ribosomal protein S24	Plasmodium falciparum
C6KT90	PF3D7_0625400	1000	1000			5	19	3	1, 5, 4, 3, 1/1, 1, 1, 1, 0	19	48.5	Uncharacterized protein	Plasmodium falciparum
Q00577	PURA,PUR1	5.42482	2.43958	1.97925e-07	9.3866	3	19	3	3, 3, 3, 3, 3/0, 2, 1, 0, 1	25	34.9	Transcriptional activator protein Pur-alpha	Homo sapiens
C6KSW5	PF3D7_0612100	3.11656	1.63995	0.00251392	22.9518	3	18	3	3, 3, 3, 3, 3/1, 2, 0, 0, 0	41	78.1	Eukaryotic translation initiation factor 3 subunit L	Plasmodium falciparum
Q8IIB6	PF3D7_1124700	1000	1000			3	17	3	3, 1, 3, 3, 3/0, 0, 0, 0, 0	17	35	GrpE protein homolog	Plasmodium falciparum
Q8I3A0	PF3D7_0904900	1000	1000			6	15	3	1, 4, 4, 3, 1/0, 2, 0, 0, 0	15	299.4	Copper-transporting ATPase	Plasmodium falciparum
Q8IBP4	PF3D7_0720700	1000	1000			6	13	3	1, 3, 4, 4, 1/0, 0, 0, 0, 0	13	258.4	Phosphoinositide-binding protein, putative	Plasmodium falciparum
C0H4U4	PF3D7_0813300	2.07404	1.05244	0.000865264	23.6216	3	35	2	3, 2, 3, 3, 3/3, 2, 3, 3, 3	45	36.3	NPL domain-containing protein	Plasmodium falciparum
Q8ILE3	PF3D7_1432100	1000	1000			9	32	2	4, 7, 7, 5, 2/0, 2, 1, 0, 0	32	33.3	Voltage-dependent anion-selective channel protein, putative	Plasmodium falciparum
P30626	SRI	2.58392	1.36956	5.92461e-06	15.5256	5	32	2	4, 4, 2, 3, 4/3, 2, 4, 4, 2	53	21.7	Sorcin	Homo sapiens
Q8IIA2	PF3D7_1126200	2.01237	1.0089	0.00381385	26.9002	4	30	2	3, 3, 2, 2, 4/2, 0, 4, 3, 2	40	17.9	40S ribosomal protein S18, putative	Plasmodium falciparum
Q8IL58	PF3D7_1441200	4.36228	2.12508	1.2276e-09	9.00067	4	29	2	4, 4, 3, 3, 2/2, 2, 3, 3, 1	45	24.8	60S ribosomal protein L1, putative	Plasmodium falciparum
Q8IBQ6	PF3D7_0719600	4.08863	2.03162	0.000433607	21.2616	3	29	2	3, 3, 3, 2, 2/3, 3, 3, 3, 2	31	20.2	60S ribosomal protein L11a, putative	Plasmodium falciparum
Q8IHS5	PF11_0454,PF3D7_1144000	2.69139	1.42835	0.0107774	30.5577	3	29	2	2, 3, 3, 3, 2/2, 3, 1, 0, 2	30	9.1	40S ribosomal protein S21	Plasmodium falciparum
Q8ILP3	P113,PF3D7_1420700	1000	1000			7	28	2	3, 5, 6, 4, 2/2, 1, 2, 1, 2	28	112.6	Surface protein P113	Plasmodium falciparum
Q8IE82	PF3D7_1323400	3.78596	1.92066	1.32826e-05	15.6141	3	28	2	3, 3, 2, 3, 2/2, 3, 3, 3, 0	39	22.1	60S ribosomal protein L23	Plasmodium falciparum
Q8ILN8	PF14_0205,PF3D7_1421200	3.05181	1.60967	3.04337e-05	16.835	4	28	2	3, 4, 3, 2, 3/2, 3, 3, 3, 2	31	11.7	40S ribosomal protein S25	Plasmodium falciparum
O97248	PF3D7_0306900	3.89105	1.96016	0.000379782	20.8175	2	27	2	2, 2, 2, 2, 1/2, 2, 2, 2, 1	28	16.1	40S ribosomal protein S23, putative	Plasmodium falciparum
O96258	PF3D7_0217800,PFB0830w	2.61125	1.38474	0.02323	34.4306	3	27	2	2, 3, 1, 3, 2/2, 3, 3, 3, 2	33	12.5	40S ribosomal protein S26	Plasmodium falciparum
Q8I3I5	PF3D7_0528200	2.91604	1.54401	0.00116167	22.7591	5	26	2	2, 4, 4, 4, 5/1, 3, 2, 1, 0	33	61.4	Eukaryotic translation initiation factor 3 subunit E	Plasmodium falciparum
Q8IK02	PF3D7_1003500	2.78174	1.47599	2.05326e-08	10.251	2	26	2	2, 2, 2, 2, 2/2, 0, 2, 2, 2	30	13.5	40S ribosomal protein S20e, putative	Plasmodium falciparum
O00806	MAL3P3.19	5.01863	2.32729	9.18121e-05	17.6561	2	24	2	2, 2, 2, 2, 2/1, 2, 1, 2, 1	31	11.9	60S acidic ribosomal protein P2	Plasmodium falciparum
C0H4K8	PF3D7_0705700	2.38774	1.25565	1.60226e-09	8.33331	3	24	2	2, 3, 3, 3, 3/2, 2, 2, 2, 2	26	6.4	40S ribosomal protein S29, putative	Plasmodium falciparum
Q8I3A2	PF3D7_0904700	1000	1000			5	23	2	3, 2, 5, 5, 4/0, 0, 0, 0, 0	23	22.5	Bacterial histone-like protein	Plasmodium falciparum
Q8IBZ9	CG10,MAL7P1.27	2.07845	1.05551	2.04833e-07	10.9611	3	23	2	2, 2, 3, 3, 2/3, 1, 2, 3, 2	28	48.7	Putative chloroquine resistance transporter	Plasmodium falciparum
Q8ILV2	PF3D7_1414300	4.88342	2.28789	5.33565e-07	11.0163	3	21	2	3, 3, 3, 2, 2/1, 1, 2, 2, 2	40	25.2	60S ribosomal protein L10, putative	Plasmodium falciparum
Q8IEC8	PF3D7_1318800	4.56985	2.19215	9.43867e-10	6.66809	4	21	2	4, 3, 3, 3, 2/1, 1, 1, 1, 2	47	75.9	Translocation protein SEC63, putative	Plasmodium falciparum
Q8IHT9	PF11_0438,PF3D7_1142600	3.5073	1.81036	9.73546e-06	13.8111	3	21	2	3, 3, 1, 2, 2/2, 2, 3, 2, 1	25	16.3	60S ribosomal protein L35ae, putative	Plasmodium falciparum
Q8I3T5	PF3D7_0517300	3.98745	1.99547	2.46838e-05	14.9091	2	20	2	2, 2, 2, 2, 2/2, 2, 2, 2, 2	26	34.6	Serine/arginine-rich splicing factor 1	Plasmodium falciparum
Q8IDI5	PF3D7_1351400	2.35957	1.23852	0.0128622	29.1609	4	20	2	3, 2, 2, 3, 3/0, 2, 1, 1, 2	38	23.4	60S ribosomal protein L17, putative	Plasmodium falciparum
P29972	AQP1,CHIP28	1000	1000			4	19	2	2, 3, 2, 3, 1/1, 1, 1, 1, 1	19	28.5	Aquaporin-1	Homo sapiens
Q8ILK3	PF14_0240,PF3D7_1426000	2.08281	1.05853	0.019717	31.4692	4	19	2	3, 3, 2, 2, 3/1, 3, 1, 1, 0	29	18.8	60S ribosomal protein L21	Plasmodium falciparum
Q8IB73	PF3D7_0823900	2.08449	1.0597	2.60999e-05	13.7125	3	18	2	1, 3, 3, 2, 2/1, 1, 3, 1, 1	27	35.4	Dicarboxylate/tricarboxylate carrier	Plasmodium falciparum
Q8I4Z4	PF3D7_1243600	2.08343	1.05896	0.0226678	32.3547	2	18	2	2, 2, 2, 2, 2/1, 2, 0, 0, 0	19	12.9	Translation initiation factor SUI1, putative	Plasmodium falciparum
Q8I608	PF3D7_1203700	9.85723	3.30118	2.18111e-08	6.88746	3	17	2	2, 2, 2, 3, 3/1, 1, 2, 0, 1	42	40.5	Nucleosome assembly protein	Plasmodium falciparum
C6S3J6	PF3D7_1460300	5.77554	2.52996	3.06073e-05	13.938	2	17	2	1, 1, 2, 2, 2/2, 1, 2, 2, 2	20	8	60S ribosomal protein L29	Plasmodium falciparum
C0H5C2	PF3D7_1317800	3.37614	1.75538	0.00666565	25.9898	2	17	2	2, 2, 2, 2, 2/1, 1, 1, 0, 1	22	16.8	40S ribosomal protein S19	Plasmodium falciparum
O75340	PDCD6,ALG2	2.91589	1.54394	0.000746669	19.2303	3	17	2	2, 3, 3, 3, 3/1, 2, 0, 0, 0	32	21.9	Programmed cell death protein 6	Homo sapiens
Q8I3V1	PF3D7_0515700	2.68319	1.42395	0.000934574	20.2433	2	17	2	2, 2, 2, 2, 2/1, 2, 2, 0, 2	21	51.8	Glideosome-associated protein 40, putative	Plasmodium falciparum
Q8IHT2	PF3D7_1143400	1000	1000			2	16	2	2, 2, 2, 2, 2/1, 0, 1, 0, 0	16	17.9	Eukaryotic translation initiation factor 4C	Plasmodium falciparum
Q8IBY4	PF3D7_0710600	6.40353	2.67887	1.39397e-07	8.10068	2	16	2	2, 2, 1, 2, 2/2, 0, 2, 2, 1	18	17.4	60S ribosomal protein L34	Plasmodium falciparum
C0H5J5	PF3D7_1360900.1	3.59378	1.8455	0.00241766	21.7851	3	16	2	2, 2, 3, 2, 2/1, 3, 1, 0, 0	26	44.8	RNA-binding protein, putative	Plasmodium falciparum
Q8II93	PF3D7_1127000	2.83851	1.50514	0.00160101	21.1819	2	16	2	1, 2, 2, 2, 2/1, 0, 2, 2, 2	17	34.5	Protein phosphatase, putative	Plasmodium falciparum
Q8I6T2	PF3D7_1345700	1000	1000			5	15	2	1, 5, 3, 3, 2/0, 0, 1, 0, 0	15	53.6	Isocitrate dehydrogenase [NADP]	Plasmodium falciparum
Q8ILB6	PF3D7_1434800	1000	1000			4	15	2	3, 3, 2, 4, 2/0, 1, 0, 0, 0	15	28.9	Mitochondrial acidic protein MAM33, putative	Plasmodium falciparum
Q8IE09	PF3D7_1331800	3.96975	1.98905	0.000729101	18.5748	2	15	2	2, 2, 2, 2, 2/2, 2, 1, 0, 0	19	15	60S ribosomal protein L23, putative	Plasmodium falciparum
Q8I463	PF3D7_0503800	3.66201	1.87264	0.00347122	23.0475	2	15	2	2, 2, 2, 2, 1/1, 2, 1, 1, 1	18	14.1	60S ribosomal protein L31	Plasmodium falciparum
Q8I2J4	Pfn,PFI1565w	2.27796	1.18774	0.00326072	22.222	3	15	2	1, 3, 2, 1, 2/1, 1, 2, 1, 1	17	19	Profilin	Plasmodium falciparum
Q6ZMA7	PF3D7_0406200	1000	1000			3	14	2	1, 2, 2, 3, 3/0, 1, 1, 1, 0	14	16.6	Sexual stage-specific protein	Plasmodium falciparum
Q8IHU4	PF3D7_1142100	1000	1000			4	14	2	2, 2, 4, 3, 3/0, 0, 0, 0, 0	14	324.8	J domain-containing protein	Plasmodium falciparum
Q8IAM2	PF3D7_0802200	3.15298	1.65672	6.00226e-06	10.0979	2	14	2	0, 2, 2, 2, 2/1, 1, 2, 1, 1	17	25.2	1-cys peroxiredoxin	Plasmodium falciparum
Q8IDQ2	PF3D7_1343700	2.12304	1.08613	0.0269889	32.1083	2	14	2	2, 2, 2, 2, 2/0, 2, 1, 0, 1	26	83.7	Kelch protein K13	Plasmodium falciparum
Q8IJF2	PF3D7_1025300	1000	1000			5	13	2	3, 3, 2, 2, 2/0, 1, 0, 0, 0	13	109.1	Uncharacterized protein	Plasmodium falciparum
Q8IK90	PF14_0716,PF3D7_1474800	1000	1000			3	13	2	2, 3, 2, 3, 2/0, 1, 0, 0, 0	13	28.8	Proteasome subunit alpha type-1, putative	Plasmodium falciparum
Q9NP58	ABCB6,MTABC3,PRP,UMAT	1000	1000			4	13	2	3, 2, 2, 3, 3/0, 0, 0, 0, 0	13	93.9	ATP-binding cassette sub-family B member 6	Homo sapiens
Q8IIX0	PF3D7_1103100	2.73545	1.45178	0.012176	26.7108	2	13	2	2, 2, 2, 2, 2/0, 1, 2, 0, 0	19	13	60S acidic ribosomal protein P1, putative	Plasmodium falciparum
C0H523	PF3D7_0907000	1000	1000			3	12	2	3, 3, 2, 2, 2/0, 0, 0, 0, 0	12	9.5	Uncharacterized protein	Plasmodium falciparum
P04632	CAPNS1,CAPN4,CAPNS	1000	1000			4	12	2	2, 1, 0, 3, 2/1, 2, 1, 0, 0	12	28.3	Calpain small subunit 1	Homo sapiens
Q8I1V2	PF3D7_0413500	1000	1000			4	12	2	2, 3, 2, 2, 2/0, 1, 0, 0, 0	12	35.2	Phosphoglucomutase-2	Plasmodium falciparum
Q8I377	PFI0355c	1000	1000			3	12	2	3, 3, 1, 2, 1/1, 0, 1, 0, 0	12	106.5	ATP-dependent protease ATPase subunit ClpY	Plasmodium falciparum
Q8I569	PF3D7_1235300	1000	1000			4	12	2	1, 2, 3, 3, 2/0, 1, 0, 0, 0	12	194.7	CCR4-NOT transcription complex subunit 4, putative	Plasmodium falciparum
A0A5K1K8Q9	PF3D7_1320000	1000	1000			3	11	2	2, 2, 3, 2, 2/0, 0, 0, 0, 0	11	149.2	Golgi protein 1	Plasmodium falciparum
Q8I476	PF3D7_0502400	1000	1000			4	11	2	0, 2, 4, 3, 1/0, 1, 0, 0, 0	11	69.4	Merozoite surface protein 8	Plasmodium falciparum
Q8IDE8	PF3D7_1355300	1000	1000			4	11	2	3, 2, 1, 2, 3/0, 0, 0, 0, 0	11	60	Histone-lysine N-methyltransferase, putative	Plasmodium falciparum
Q8IJZ3	PF3D7_1004400	1000	1000			5	11	2	1, 2, 4, 3, 1/0, 0, 0, 0, 0	11	106.3	RNA-binding protein, putative	Plasmodium falciparum
Q8IL86	PF3D7_1438100	4.09953	2.03546	0.00538462	21.4057	2	11	2	2, 2, 2, 1, 2/1, 1, 0, 0, 0	12	43.9	Translocation protein SEC62	Plasmodium falciparum
Q8I266	PF3D7_0107500	2.4025	1.26454	0.00530998	21.342	2	11	2	1, 2, 1, 2, 2/1, 0, 1, 1, 0	19	170.3	Niemann-Pick type C1-related protein	Plasmodium falciparum
Q8I2G1	PF3D7_0935900	2.07299	1.05171	0.000488247	14.0922	2	11	2	2, 2, 2, 2, 0/0, 1, 1, 1, 0	29	83	Ring-exported protein 1	Plasmodium falciparum
C6KT09	PF3D7_0616800	1000	1000			3	10	2	1, 2, 2, 3, 2/0, 0, 0, 0, 0	10	59.5	Malate:quinone oxidoreductase	Plasmodium falciparum
Q8I5Q3	PF3D7_1215300	1000	1000			2	10	2	2, 2, 2, 2, 2/0, 0, 0, 0, 0	10	11.1	10 kDa chaperonin	Plasmodium falciparum
Q8IDZ5	PF3D7_1333300	1000	1000			2	10	2	0, 2, 2, 2, 1/0, 1, 1, 0, 0	10	25	Transmembrane emp24 domain-containing protein, putative	Plasmodium falciparum
Q8ILU3	PF3D7_1415300	1000	1000			3	10	2	2, 3, 2, 1, 2/0, 0, 0, 0, 0	10	37.5	RNA-binding protein Nova-1, putative	Plasmodium falciparum
P23588	EIF4B	5.80049	2.53617	0.00157885	15.7954	2	10	2	1, 2, 2, 2, 1/0, 1, 0, 1, 0	16	69.2	Eukaryotic translation initiation factor 4B	Homo sapiens
Q8ILR6	PF3D7_1418000	1000	1000			2	9	2	1, 2, 2, 2, 2/0, 0, 0, 0, 0	9	32.5	Ubiquitin fusion degradation protein 1, putative	Plasmodium falciparum
C6KST3	PF3D7_0608500	4.80352	2.26409	0.0435024	30.832	2	9	2	0, 2, 2, 2, 1/0, 1, 1, 0, 0	15	26.5	Proteasome subunit alpha type-2, putative	Plasmodium falciparum
C6KT11	PF3D7_0617000	1000	1000			2	8	2	1, 2, 1, 2, 2/0, 0, 0, 0, 0	8	43.6	Mitochondrial import receptor subunit TOM40, putative	Plasmodium falciparum
Q8IFN1	PF3D7_0423500	1000	1000			3	8	2	2, 1, 2, 2, 0/0, 0, 0, 1, 0	8	42.6	Glideosome associated protein with multiple membrane spans 2	Plasmodium falciparum
O96252	PF3D7_0217100	1000	1000			3	7	2	2, 2, 1, 2, 0/0, 0, 0, 0, 0	7	61.8	ATP synthase subunit alpha	Plasmodium falciparum
Q8IIR8	PF3D7_1108500	1000	1000			2	7	2	0, 1, 2, 2, 2/0, 0, 0, 0, 0	7	35.4	Succinate--CoA ligase [ADP-forming] subunit alpha, mitochondrial	Plasmodium falciparum
	Gene & Synonyms	Ab Cytoplasm/Control Cytoplasm								Total peptides in set	MW (kDa)	Description
		Ratio	Log2(Ratio)	Adj. p-value	CV %	Dist. pept. used	Pept. used	Pep. filter	Distrib. dist. pep. in replic.
	PF3D7_1464600	2.26348	1.17854	1.577e-06	13.9122	6	31	3	4, 5, 5, 4, 3/0, 4, 3, 2, 1	70	170.5	Serine/threonine protein phosphatase UIS2, putative
	PF3D7_1127000	2.83851	1.50514	0.00160101	21.1819	2	16	2	1, 2, 2, 2, 2/1, 0, 2, 2, 2	17	34.5	Protein phosphatase, putative

## Sheet: Cyto PfMaf1 not in Nuc PfMaf1
Significant and unique PfMaf1 cytoplasmic proteins not found in significant and unique PfMaf1 nuclear proteins.
56 proteins	Gene & Synonyms	Ab Nuclear/Ab Cytoplasm								Total peptides in set	MW (kDa)	Description	Species
		Ratio	Log2(Ratio)	Adj. p-value	CV %	Dist. pept. used	Pept. used	Pep. filter	Distrib. dist. pep. in replic.
P02549	SPTA1,SPTA	0.336841	-1.56986	0	1.86456	173	1829	139	119, 130, 130, 123, 124/139, 157, 139, 157, 148	2216	280	Spectrin alpha chain, erythrocytic 1	Homo sapiens
P11277	SPTB,SPTB1	0.397792	-1.32991	9.20497e-222	2.54112	134	1508	107	101, 107, 101, 102, 95/113, 122, 107, 126, 122	1791	246.5	Spectrin beta chain, erythrocytic	Homo sapiens
P16157	ANK1,ANK	0.386777	-1.37042	1.24528e-85	4.11265	61	602	49	37, 46, 52, 46, 47/49, 49, 49, 58, 51	739	206.3	Ankyrin-1	Homo sapiens
Q8I5H4	PF3D7_1224300,PFL1170w	0.372434	-1.42494	2.97538e-57	4.0593	23	206	18	17, 16, 9, 14, 17/19, 21, 18, 21, 19	253	97.2	Polyadenylate-binding protein	Plasmodium falciparum
P02730	SLC4A1,AE1,DI,EPB3	0.17575	-2.50841	1.10872e-67	3.49373	23	212	17	19, 17, 20, 17, 19/18, 16, 18, 21, 21	251	101.8	Band 3 anion transport protein	Homo sapiens
P11171	EPB41,E41P	0.411742	-1.28019	2.30502e-18	9.81465	20	198	16	14, 10, 15, 10, 13/17, 16, 19, 18, 19	287	97	Protein 4.1	Homo sapiens
O75955	FLOT1	0.127497	-2.97147	1.37497e-50	3.42003	17	125	11	8, 6, 12, 9, 9/11, 15, 15, 15, 14	192	47.4	Flotillin-1	Homo sapiens
Q14254	FLOT2,ESA1,M17S1	0.118466	-3.07745	2.93702e-35	4.31833	12	94	10	5, 4, 10, 2, 5/10, 12, 12, 11, 12	147	47.1	Flotillin-2	Homo sapiens
Q8IAX8	PF3D7_0814200	0.286263	-1.80459	1.52108e-39	4.42657	13	118	9	8, 8, 7, 10, 7/11, 11, 9, 11, 11	158	27.3	DNA/RNA-binding protein Alba 1	Plasmodium falciparum
Q08495	DMTN,DMT,EPB49	0.142903	-2.80689	1.92391e-34	4.69278	12	98	9	7, 10, 12, 10, 8/10, 11, 10, 9, 11	131	45.5	Dematin	Homo sapiens
A0A143ZZK9	PF3D7_1211900	0.411264	-1.28186	1.03722e-16	9.17675	14	98	8	9, 8, 9, 4, 6/8, 13, 12, 12, 11	120	140.3	Non-SERCA-type Ca2+ -transporting P-ATPase	Plasmodium falciparum
Q8ILQ3	PF3D7_1419700	0.487099	-1.03771	1.3495e-13	10.4035	10	83	8	2, 8, 7, 8, 7/8, 9, 10, 9, 8	97	59.7	eIF3h_C domain-containing protein	Plasmodium falciparum
Q8ILA1	PF3D7_1436300	0.125108	-2.99876	4.87194e-41	2.95342	12	78	8	6, 4, 7, 2, 7/8, 12, 10, 9, 9	160	112.4	Translocon component PTEX150	Plasmodium falciparum
Q8IJW4	PF3D7_1007900	0.471759	-1.08388	1.09544e-18	8.36685	13	99	7	7, 10, 9, 8, 7/8, 9, 7, 9, 10	133	63.1	Eukaryotic translation initiation factor 3 subunit D	Plasmodium falciparum
P35612	ADD2,ADDB	0.235368	-2.08701	4.76738e-25	6.46148	13	99	7	6, 9, 6, 6, 7/9, 12, 7, 11, 11	133	80.9	Beta-adducin	Homo sapiens
Q8IJX3	PF3D7_1006800	0.251799	-1.98966	1.54896e-20	7.35839	8	83	7	8, 7, 8, 6, 5/7, 8, 7, 7, 7	92	29.5	Single-strand telomeric DNA-binding protein GBP2, putative	Plasmodium falciparum
Q8IJV6	PF3D7_1008900	0.489583	-1.03037	7.17985e-11	11.8515	9	67	7	6, 6, 6, 6, 5/7, 9, 7, 8, 7	74	27.6	Adenylate kinase 1	Plasmodium falciparum
P35611	ADD1,ADDA	0.147776	-2.75852	1.54048e-27	5.59232	12	89	6	3, 10, 9, 6, 8/6, 12, 8, 12, 12	134	81	Alpha-adducin	Homo sapiens
P11166	SLC2A1,GLUT1	0.19705	-2.34337	4.49168e-35	4.18856	8	86	6	5, 7, 6, 8, 6/6, 7, 6, 8, 8	108	54.1	Solute carrier family 2, facilitated glucose transporter member 1	Homo sapiens
Q8IJ76	PF3D7_1033200	0.455992	-1.13292	8.10637e-15	9.41777	11	76	6	6, 6, 8, 3, 9/8, 9, 6, 8, 7	100	38.9	Early transcribed membrane protein 10.2	Plasmodium falciparum
Q8IIR7	PF3D7_1108600	0.226886	-2.13996	7.12598e-18	7.11921	7	58	6	4, 4, 5, 2, 5/7, 7, 6, 7, 6	71	39.4	Endoplasmic reticulum-resident calcium binding protein	Plasmodium falciparum
Q8IC14		0.001	-1000			17	50	6	0, 0, 0, 0, 0/6, 10, 10, 12, 9	50	194.4	Uncharacterized protein	Plasmodium falciparum
Q96PL5	ERMAP,RD,SC	0.001	-1000			8	40	6	0, 0, 0, 0, 0/6, 7, 6, 7, 7	40	52.6	Erythroid membrane-associated protein	Homo sapiens
Q8IIQ7	PF3D7_1110400	0.460542	-1.11859	7.39663e-16	8.87234	10	75	5	3, 8, 8, 6, 7/7, 8, 8, 9, 5	94	173.9	RNA-binding protein, putative	Plasmodium falciparum
Q8IKN7	PF3D7_1459400	0.431955	-1.21105	6.86574e-13	10.2956	8	67	5	6, 6, 6, 5, 5/5, 7, 6, 7, 7	76	40.1	Uncharacterized protein	Plasmodium falciparum
Q8I2Y5	PF3D7_0916700	0.343218	-1.5428	1.60059e-23	5.64149	8	67	5	3, 7, 5, 7, 6/7, 5, 7, 5, 6	104	45.1	RNA-binding protein musashi, putative	Plasmodium falciparum
Q8IJX8	PF10_0063,PF3D7_1006200	0.22102	-2.17775	5.02761e-19	6.79129	7	61	5	3, 5, 3, 5, 7/5, 5, 5, 7, 6	78	12	DNA/RNA-binding protein Alba 3	Plasmodium falciparum
P28289	TMOD1,D9S57E,TMOD	0.160762	-2.637	1.12284e-23	5.46981	10	66	4	1, 5, 3, 5, 9/6, 4, 10, 10, 9	126	40.6	Tropomodulin-1	Homo sapiens
Q8I2T2	PF3D7_0922100	0.399188	-1.32486	1.4689e-08	13.0942	7	46	4	4, 3, 2, 4, 3/6, 6, 7, 4, 7	64	182.1	Ubiquitin-like protein, putative	Plasmodium falciparum
Q00577	PURA,PUR1	0.191469	-2.38482	3.03777e-10	9.19815	5	31	4	2, 1, 4, 2, 1/4, 4, 4, 5, 4	32	34.9	Transcriptional activator protein Pur-alpha	Homo sapiens
Q8I544	PF3D7_1237900	0.001	-1000			8	30	4	0, 0, 2, 0, 0/4, 5, 8, 6, 4	30	140.9	Uncharacterized protein	Plasmodium falciparum
Q8I3T8	PF3D7_0517000	0.430545	-1.21576	4.4976e-11	9.9753	6	42	3	4, 6, 3, 6, 4/5, 4, 4, 3, 3	65	18.1	60S ribosomal protein L12, putative	Plasmodium falciparum
C0H4L6	PF3D7_0706500	0.420715	-1.24908	7.85709e-05	19.5767	5	30	3	3, 3, 5, 2, 1/1, 5, 3, 3, 4	55	196.6	Uncharacterized protein	Plasmodium falciparum
A0A5K1K910	PF3D7_1344800	0.001	-1000			6	27	3	2, 0, 2, 1, 2/3, 5, 4, 5, 3	27	43.3	Aspartate carbamoyltransferase	Plasmodium falciparum
Q8IIU5	PF3D7_1105800	0.246071	-2.02285	1.0809e-08	9.54685	5	25	3	0, 4, 2, 0, 3/3, 3, 4, 3, 3	45	30.7	Uncharacterized protein	Plasmodium falciparum
Q8IIX0	PF3D7_1103100	0.469681	-1.09025	0.00196425	25.7868	3	23	3	2, 3, 2, 2, 3/1, 3, 3, 1, 3	31	13	60S acidic ribosomal protein P1, putative	Plasmodium falciparum
P06753	TPM3	0.103791	-3.26825	7.15516e-21	4.84104	4	44	2	3, 2, 4, 2, 3/2, 4, 4, 4, 4	80	33	Tropomyosin alpha-3 chain	Homo sapiens
Q8IE82	PF3D7_1323400	0.411806	-1.27996	1.22736e-05	16.9932	3	30	2	2, 1, 3, 3, 2/3, 3, 2, 3, 2	41	22.1	60S ribosomal protein L23	Plasmodium falciparum
O00806	MAL3P3.19	0.37278	-1.4236	9.53591e-08	12.3268	3	29	2	1, 2, 2, 1, 2/2, 3, 3, 3, 3	39	11.9	60S acidic ribosomal protein P2	Plasmodium falciparum
Q8IB73	PF3D7_0823900	0.322354	-1.63328	9.80184e-09	9.13895	5	24	2	1, 3, 1, 0, 2/3, 5, 5, 2, 2	31	35.4	Dicarboxylate/tricarboxylate carrier	Plasmodium falciparum
Q8ILP3	P113,PF3D7_1420700	0.001	-1000			7	23	2	0, 1, 1, 0, 1/3, 5, 6, 4, 2	23	112.6	Surface protein P113	Plasmodium falciparum
P23588	EIF4B	0.403755	-1.30845	0.000130998	17.5293	3	18	2	1, 0, 1, 1, 2/2, 3, 3, 3, 2	21	69.2	Eukaryotic translation initiation factor 4B	Homo sapiens
Q8I5Q3	PF3D7_1215300	0.334601	-1.57949	0.000266559	18.914	2	17	2	1, 1, 2, 1, 2/2, 2, 2, 2, 2	17	11.1	10 kDa chaperonin	Plasmodium falciparum
Q8IHU4	PF3D7_1142100	0.365223	-1.45315	0.00035666	18.4759	2	15	2	2, 2, 0, 2, 2/1, 0, 2, 2, 2	23	324.8	J domain-containing protein	Plasmodium falciparum
P09493	TPM1,C15orf13,TMSA	0.129312	-2.95107	2.47914e-06	10.8141	2	15	2	1, 1, 1, 1, 1/2, 2, 2, 2, 2	31	32.7	Tropomyosin alpha-1 chain	Homo sapiens
C0H523	PF3D7_0907000	0.001	-1000			3	15	2	1, 1, 1, 0, 0/3, 3, 2, 2, 2	15	9.5	Uncharacterized protein	Plasmodium falciparum
Q6ZMA7	PF3D7_0406200	0.001	-1000			3	15	2	1, 1, 1, 0, 1/1, 2, 2, 3, 3	15	16.6	Sexual stage-specific protein	Plasmodium falciparum
P29972	AQP1,CHIP28	0.213197	-2.22974	0.000515285	18.7586	2	14	2	1, 1, 2, 0, 1/2, 2, 2, 2, 1	19	28.5	Aquaporin-1	Homo sapiens
Q9NP58	ABCB6,MTABC3,PRP,UMAT	0.001	-1000			4	14	2	0, 0, 0, 1, 0/3, 2, 2, 3, 3	14	93.9	ATP-binding cassette sub-family B member 6	Homo sapiens
A0A5K1K8Q9	PF3D7_1320000	0.312039	-1.6802	0.000489909	16.9247	2	12	2	0, 1, 0, 0, 1/2, 2, 2, 2, 2	14	149.2	Golgi protein 1	Plasmodium falciparum
Q8II93	PF3D7_1127000	0.297084	-1.75106	0.00429471	23.8949	2	12	2	1, 1, 0, 0, 1/1, 2, 2, 2, 2	16	34.5	Protein phosphatase, putative	Plasmodium falciparum
Q8I569	PF3D7_1235300	0.001	-1000			4	12	2	0, 0, 1, 0, 0/1, 2, 3, 3, 2	12	194.7	CCR4-NOT transcription complex subunit 4, putative	Plasmodium falciparum
Q8I476	PF3D7_0502400	0.001	-1000			4	11	2	0, 0, 0, 1, 0/0, 2, 4, 3, 1	11	69.4	Merozoite surface protein 8	Plasmodium falciparum
Q8IDZ5	PF3D7_1333300	0.001	-1000			2	11	2	0, 1, 0, 1, 1/0, 2, 2, 2, 1	11	25	Transmembrane emp24 domain-containing protein, putative	Plasmodium falciparum
O96252	PF3D7_0217100	0.001	-1000			3	8	2	0, 0, 0, 0, 1/2, 2, 1, 2, 0	8	61.8	ATP synthase subunit alpha	Plasmodium falciparum
Q8IIR8	PF3D7_1108500	0.001	-1000			2	7	2	0, 0, 0, 0, 0/0, 1, 2, 2, 2	7	35.4	Succinate--CoA ligase [ADP-forming] subunit alpha, mitochondrial	Plasmodium falciparum
Molecular Functions
ID	Name	Bgd count	Result count	Result gene list	Pct of bgd	Fold enrichment	Odds ratio	P-value	Benjamini	Bonferroni
GO:0003729	mRNA binding	119	11	PF3D7_0706500,PF3D7_0814200,PF3D7_0916700,PF3D7_1006200,PF3D7_1006800,PF3D7_1007900,PF3D7_1105800,PF3D7_1110400,PF3D7_1224300,PF3D7_1235300,PF3D7_1419700,	9.2	12.86	20.05	2.97707712783e-10	3.48318023957e-08	3.48318023957e-08
GO:0003723	RNA binding	628	16	PF3D7_0309600,PF3D7_0517000,PF3D7_0706500,PF3D7_0814200,PF3D7_0916700,PF3D7_1006200,PF3D7_1006800,PF3D7_1007900,PF3D7_1105800,PF3D7_1110400,PF3D7_1224300,PF3D7_1235300,PF3D7_1323400,PF3D7_1333300,PF3D7_1419700,PF3D7_1459400,	2.5	3.54	5.81	1.84364388844e-06	0.000107853167474	0.000215706334948
GO:0003676	nucleic acid binding	224	7	PF3D7_0814200,PF3D7_0916700,PF3D7_1006200,PF3D7_1006800,PF3D7_1110400,PF3D7_1224300,PF3D7_1235300,	3.1	4.35	5.32	0.000886310746873	0.0345661191281	0.103698357384
GO:0005310	dicarboxylic acid transmembrane transporter activity	1	1	PF3D7_0823900,	100.0	139.09	inf	0.00718981101069	0.0600862777322	0.841207888251
GO:0015367	oxoglutarate:malate antiporter activity	1	1	PF3D7_0823900,	100.0	139.09	inf	0.00718981101069	0.0600862777322	0.841207888251
GO:0015140	malate transmembrane transporter activity	1	1	PF3D7_0823900,	100.0	139.09	inf	0.00718981101069	0.0600862777322	0.841207888251
GO:0015139	alpha-ketoglutarate transmembrane transporter activity	1	1	PF3D7_0823900,	100.0	139.09	inf	0.00718981101069	0.0600862777322	0.841207888251
GO:0098808	mRNA cap binding	1	1	PF3D7_1007900,	100.0	139.09	inf	0.00718981101069	0.0600862777322	0.841207888251
GO:0008266	poly(U) RNA binding	1	1	PF3D7_1224300,	100.0	139.09	inf	0.00718981101069	0.0600862777322	0.841207888251
GO:0030371	translation repressor activity	1	1	PF3D7_0814200,	100.0	139.09	inf	0.00718981101069	0.0600862777322	0.841207888251
GO:0015556	C4-dicarboxylate transmembrane transporter activity	1	1	PF3D7_0823900,	100.0	139.09	inf	0.00718981101069	0.0600862777322	0.841207888251
GO:0016743	carboxyl- or carbamoyltransferase activity	1	1	PF3D7_1344800,	100.0	139.09	inf	0.00718981101069	0.0600862777322	0.841207888251
GO:0004070	aspartate carbamoyltransferase activity	1	1	PF3D7_1344800,	100.0	139.09	inf	0.00718981101069	0.0600862777322	0.841207888251
GO:0000900	translation repressor activity, mRNA regulatory element binding	1	1	PF3D7_0814200,	100.0	139.09	inf	0.00718981101069	0.0600862777322	0.841207888251
GO:0004776	succinate-CoA ligase (GDP-forming) activity	2	1	PF3D7_1108500,	50.0	69.54	142.12	0.014329395275	0.088238907746	1.0
GO:0030295	protein kinase activator activity	2	1	PF3D7_1103100,	50.0	69.54	142.12	0.014329395275	0.088238907746	1.0
GO:0051880	G-quadruplex DNA binding	2	1	PF3D7_1006800,	50.0	69.54	142.12	0.014329395275	0.088238907746	1.0
GO:0019209	kinase activator activity	2	1	PF3D7_1103100,	50.0	69.54	142.12	0.014329395275	0.088238907746	1.0
GO:0043531	ADP binding	2	1	PF3D7_0217100,	50.0	69.54	142.12	0.014329395275	0.088238907746	1.0
GO:0004774	succinate-CoA ligase activity	3	1	PF3D7_1108500,	33.3	46.36	71.04	0.0214190934183	0.0963859203822	1.0
GO:0005388	P-type calcium transporter activity	3	1	PF3D7_1211900,	33.3	46.36	71.04	0.0214190934183	0.0963859203822	1.0
GO:0008143	poly(A) binding	3	1	PF3D7_1224300,	33.3	46.36	71.04	0.0214190934183	0.0963859203822	1.0
GO:0070717	poly-purine tract binding	3	1	PF3D7_1224300,	33.3	46.36	71.04	0.0214190934183	0.0963859203822	1.0
GO:0003730	mRNA 3'-UTR binding	3	1	PF3D7_1224300,	33.3	46.36	71.04	0.0214190934183	0.0963859203822	1.0
GO:0015301	anion:anion antiporter activity	3	1	PF3D7_0823900,	33.3	46.36	71.04	0.0214190934183	0.0963859203822	1.0
GO:0004775	succinate-CoA ligase (ADP-forming) activity	3	1	PF3D7_1108500,	33.3	46.36	71.04	0.0214190934183	0.0963859203822	1.0
GO:0003735	structural constituent of ribosome	163	4	PF3D7_0309600,PF3D7_0517000,PF3D7_1103100,PF3D7_1323400,	2.5	3.41	3.79	0.0282849001556	0.110991050919	1.0
GO:0140323	solute:anion antiporter activity	4	1	PF3D7_0823900,	25.0	34.77	47.35	0.0284592438253	0.110991050919	1.0
GO:0016597	amino acid binding	4	1	PF3D7_1344800,	25.0	34.77	47.35	0.0284592438253	0.110991050919	1.0
GO:0008187	poly-pyrimidine tract binding	4	1	PF3D7_1224300,	25.0	34.77	47.35	0.0284592438253	0.110991050919	1.0
GO:0019843	rRNA binding	38	2	PF3D7_0517000,PF3D7_1323400,	5.3	7.32	8.08	0.0300310266524	0.113342907043	1.0
GO:0015085	calcium ion transmembrane transporter activity	5	1	PF3D7_1211900,	20.0	27.82	35.51	0.0354501826547	0.12568701123	1.0
GO:0070180	large ribosomal subunit rRNA binding	5	1	PF3D7_0517000,	20.0	27.82	35.51	0.0354501826547	0.12568701123	1.0
GO:0004725	protein tyrosine phosphatase activity	6	1	signif	16.7	23.18	28.4	0.0423922438529	0.142625714981	1.0
GO:0015078	proton transmembrane transporter activity	46	2	PF3D7_0217100,PF3D7_1211900,	4.3	6.05	6.6	0.0426658121739	0.142625714981	1.0
GO:0008553	P-type proton-exporting transporter activity	7	1	PF3D7_1211900,	14.3	19.87	23.66	0.0492857591692	0.148826662266	1.0
GO:0004017	adenylate kinase activity	7	1	PF3D7_1008900,	14.3	19.87	23.66	0.0492857591692	0.148826662266	1.0
GO:0000339	RNA cap binding	7	1	PF3D7_1007900,	14.3	19.87	23.66	0.0492857591692	0.148826662266	1.0
GO:0022853	active ion transmembrane transporter activity	50	2	PF3D7_0823900,PF3D7_1211900,	4.0	5.56	6.04	0.0496088874219	0.148826662266	1.0

## Sheet: Nuclear PfMaf1
Significant and unique proteins found in the PfMaf1 nuclear fractions and not in the control nuclear fractions.
54 proteins	Gene & Synonyms	Ab Nuclear/Control Nuclear								Total peptides in set	MW (kDa)	Description	Species
		Ratio	Log2(Ratio)	Adj. p-value	CV %	Dist. pept. used	Pept. used	Pep. filter	Distrib. dist. pep. in replic.
Q8I5L6	PFL0930w	2.21906	1.14995	1.04217e-50	4.40988	33	208	23	23, 25, 25, 25, 23/15, 1, 9, 24, 22	291	232.9	Clathrin heavy chain	Plasmodium falciparum
C6KT34	PFF0940c	6.57264	2.71647	7.36618e-60	3.11713	23	154	18	18, 18, 18, 19, 22/14, 1, 7, 12, 15	246	92.4	Cell division cycle protein 48 homologue, putative	Plasmodium falciparum
Q8II24	PF3D7_1134000	5.31369	2.40971	7.66787e-59	3.06983	19	141	15	17, 18, 18, 19, 15/12, 5, 10, 13, 14	228	73.3	Heat shock protein 70	Plasmodium falciparum
Q8IHR4	PF3D7_1145400	2.8078	1.48944	1.41364e-41	4.37722	22	137	12	12, 18, 20, 16, 19/14, 1, 9, 11, 11	209	96.4	Dynamin-like protein	Plasmodium falciparum
P19474	TRIM21,RNF81,RO52,SSA1	2.3033	1.2037	6.5389e-10	12.9756	13	113	9	12, 9, 9, 10, 12/11, 8, 9, 9, 10	126	54.2	E3 ubiquitin-protein ligase TRIM21	Homo sapiens
Q8IE67	PF13_0143 PF3D7_1325100	2.06292	1.04469	2.0933e-13	9.86795	12	85	9	9, 10, 9, 9, 9/8, 2, 7, 8, 7	111	49.4	Phosphoribosylpyrophosphate synthetase	Plasmodium falciparum
Q8I5C6	PF3D7_1229300	12.1785	3.60626	2.23032e-15	7.23459	9	53	7	9, 8, 9, 8, 7/5, 1, 1, 2, 3	186	117.5	Uncharacterized protein	Plasmodium falciparum
Q8I2X3	PF3D7_0918000	2.97384	1.57233	2.64708e-29	4.22757	8	69	6	7, 6, 6, 7, 6/7, 3, 3, 7, 7	81	44.6	Acid phosphatase	Plasmodium falciparum
Q8I0V3	PF3D7_1232100	2.39998	1.26302	3.18852e-12	9.8578	12	68	6	10, 6, 9, 7, 9/8, 0, 4, 4, 5	114	81.5	60 kDa chaperonin	Plasmodium falciparum
Q8III6	PF3D7_1118200	3.08316	1.62441	8.22939e-09	11.9567	9	53	6	6, 9, 9, 8, 6/1, 0, 3, 3, 5	104	108.5	Heat shock protein 90, putative	Plasmodium falciparum
Q8I1S2	PF3D7_0416500	1000	1000			8	50	6	7, 6, 6, 7, 6/2, 1, 1, 1, 1	50	46.5	Repressor of RNA polymerase III transcription MAF1	Plasmodium falciparum
O97239	PFC0245c	3.09188	1.62848	7.7265e-17	5.91607	8	46	6	6, 7, 6, 7, 7/6, 0, 0, 3, 4	94	467.9	Protein dopey homolog PFC0245c	Plasmodium falciparum
Q8I3K7	PF3D7_0525800	3.29076	1.71842	2.33955e-24	5.27646	8	69	5	5, 7, 8, 7, 8/5, 3, 5, 8, 5	70	34.3	Inner membrane complex protein 1g, putative	Plasmodium falciparum
Q8IB63	PF3D7_0822900	2.13676	1.09542	6.5117e-07	13.603	7	41	4	6, 5, 7, 4, 5/2, 0, 3, 4, 5	64	138.2	Uncharacterized protein	Plasmodium falciparum
Q8ILR6	PF3D7_1418000	1000	1000			4	20	4	4, 4, 4, 4, 4/0, 0, 0, 0, 0	20	32.5	Ubiquitin fusion degradation protein 1, putative	Plasmodium falciparum
Q8I490	PF3D7_0501000	2.23663	1.16133	3.088e-07	13.8289	4	47	3	3, 4, 3, 4, 4/4, 4, 2, 4, 3	51	30.7	Uncharacterized protein	Plasmodium falciparum
P01031	C5,CPAMD4	2.024	1.01721	0.000330867	20.0692	5	38	3	4, 4, 3, 5, 5/4, 1, 3, 5, 4	56	188.3	Complement C5	Homo sapiens
Q8IEJ0	PF3D7_1301700	2.54377	1.34697	9.55209e-06	14.0631	3	27	3	3, 3, 3, 3, 3/3, 0, 1, 2, 1	31	28.3	CX3CL1-binding protein 2	Plasmodium falciparum
Q8I3V1	PF3D7_0515700	3.4913	1.80376	2.75198e-10	7.19268	4	26	3	4, 4, 4, 3, 3/0, 0, 2, 3, 3	32	51.8	Glideosome-associated protein 40, putative	Plasmodium falciparum
Q8I570	PF3D7_1235200	1000	1000			4	25	3	4, 4, 4, 4, 3/1, 0, 0, 1, 2	25	117.1	H(+)-exporting diphosphatase	Plasmodium falciparum
Q8IK01	PF3D7_1003600	2.80236	1.48664	8.34868e-08	12.9434	4	47	2	3, 3, 2, 3, 3/4, 3, 2, 3, 2	62	32.7	Inner membrane complex protein 1c, putative	Plasmodium falciparum
C0H5L9	PF3D7_1370300	2.14432	1.10052	0.000466598	20.0686	3	32	2	2, 2, 3, 3, 3/3, 1, 2, 3, 2	37	28.9	Membrane associated histidine-rich protein 1	Plasmodium falciparum
Q8IKM6	PF3D7_1460600	2.37022	1.24502	0.000303862	18.4218	4	27	2	2, 3, 4, 4, 3/3, 1, 3, 2, 2	31	17.1	Inner membrane complex sub-compartment protein 3	Plasmodium falciparum
Q8IAM2	PF3D7_0802200	2.21837	1.1495	0.000121077	15.2413	2	19	2	2, 2, 2, 2, 2/1, 2, 2, 2, 2	20	25.2	1-cys peroxiredoxin	Plasmodium falciparum
Q8I426	PF3D7_0507700	4.54419	2.18402	0.000727874	17.5293	3	18	2	3, 2, 3, 2, 2/2, 0, 2, 0, 2	32	62.6	Nuclear protein localization protein 4, putative	Plasmodium falciparum
Q8I2D9	PF3D7_0113900	2.96637	1.5687	7.41454e-07	8.39815	3	18	2	2, 2, 3, 2, 2/2, 0, 1, 0, 3	29	28.2	CX3CL1-binding protein 1	Plasmodium falciparum
Q8IK15	PF3D7_1002100	2.94376	1.55766	0.00190223	19.5772	3	18	2	2, 2, 3, 2, 2/2, 1, 1, 1, 2	20	69.9	EMP1-trafficking protein	Plasmodium falciparum
Q8IJS1	PF10_0121,PF3D7_1012400	2.25098	1.17055	0.00334789	21.1818	3	18	2	2, 2, 3, 2, 2/2, 0, 1, 2, 2	23	26.4	Hypoxanthine phosphoribosyltransferase	Plasmodium falciparum
Q8I6T2	PF3D7_1345700	1000	1000			7	17	2	3, 4, 3, 2, 3/0, 0, 0, 0, 2	17	53.6	Isocitrate dehydrogenase [NADP]	Plasmodium falciparum
Q8IB73	PF3D7_0823900	1000	1000			7	16	2	1, 5, 3, 0, 2/2, 2, 0, 0, 1	16	35.4	Dicarboxylate/tricarboxylate carrier	Plasmodium falciparum
Q8IM26	PF3D7_1406800	5.38946	2.43014	1.2507e-05	11.0047	2	16	2	1, 2, 2, 2, 1/2, 1, 2, 2, 1	17	32.9	Glideosome associated protein with multiple membrane spans 3	Plasmodium falciparum
Q8ILI9	PF3D7_1427500	2.04458	1.0318	0.036533	30.3878	3	16	2	3, 3, 2, 2, 3/1, 0, 1, 0, 1	24	94.7	DNA mismatch repair protein MSH2, putative	Plasmodium falciparum
O00442	RTCA,RPC,RPC1,RTC1,RTCD1	1000	1000			3	15	2	1, 3, 2, 3, 3/0, 0, 1, 1, 1	15	39.3	RNA 3'-terminal phosphate cyclase	Homo sapiens
Q8IFP5	PF3D7_0422100	1000	1000			5	15	2	2, 4, 3, 2, 1/0, 0, 1, 1, 1	15	44.9	Transmembrane emp24 domain-containing protein, putative	Plasmodium falciparum
Q8IIU5	PF3D7_1105800	1000	1000			5	15	2	1, 4, 2, 1, 3/1, 0, 1, 1, 1	15	30.7	Uncharacterized protein	Plasmodium falciparum
Q8IM01	PF3D7_1409400	2.86112	1.51658	2.28956e-06	8.73088	2	15	2	1, 2, 2, 1, 2/2, 0, 1, 2, 2	21	30.5	Uncharacterized protein	Plasmodium falciparum
C0H5G2	PF3D7_1340700	2.38646	1.25487	0.000699874	14.8178	4	15	2	2, 2, 3, 1, 2/2, 0, 0, 2, 1	21	25.9	Ras-related protein Rab-11B	Plasmodium falciparum
O97224	PF3D7_0303400	1000	1000			4	14	2	3, 4, 2, 2, 3/0, 0, 0, 0, 0	14	73.9	Palmitoyltransferase	Plasmodium falciparum
Q8I2I2	PF3D7_0933600	1000	1000			4	14	2	3, 2, 3, 4, 1/0, 0, 1, 0, 0	14	55.7	Mitochondrial-processing peptidase subunit beta, putative	Plasmodium falciparum
Q8II27	PF3D7_1133800	3.5881	1.84322	0.000715745	14.8893	3	14	2	1, 3, 2, 1, 2/1, 0, 0, 2, 2	23	101.6	RNA (Uracil-5-)methyltransferase, putative	Plasmodium falciparum
Q8I308	PF3D7_0914400	2.14569	1.10144	0.0165911	23.8933	4	14	2	1, 3, 1, 2, 3/1, 2, 0, 0, 1	25	28.4	Uncharacterized protein	Plasmodium falciparum
C0H5A5	PF3D7_1308000	1000	1000			6	13	2	4, 2, 4, 2, 1/0, 0, 0, 0, 0	13	100	Uncharacterized protein	Plasmodium falciparum
Q8I5X9	PF3D7_1206600	1000	1000			6	13	2	2, 3, 3, 3, 2/0, 0, 0, 0, 0	13	167.3	DNA-directed RNA polymerase subunit beta	Plasmodium falciparum
Q8IBP4	PF3D7_0720700	1000	1000			4	13	2	2, 2, 3, 1, 3/0, 0, 0, 1, 1	13	258.4	Phosphoinositide-binding protein, putative	Plasmodium falciparum
Q8IE49	PF3D7_1329000	1000	1000			5	13	2	2, 3, 1, 3, 2/1, 1, 0, 0, 0	13	274.8	DNA-directed RNA polymerase subunit	Plasmodium falciparum
Q8IKS3	PF3D7_1455500	2.52006	1.33346	0.0100149	22.4988	2	13	2	2, 2, 2, 2, 1/1, 0, 0, 1, 2	17	124.2	AP-1 complex subunit gamma, putative	Plasmodium falciparum
A0A5K1K8Y1	PF3D7_1345600	1000	1000			3	11	2	3, 2, 2, 3, 1/0, 0, 0, 0, 0	11	43.2	Inner membrane complex protein	Plasmodium falciparum
Q8IJF2	PF3D7_1025300	1000	1000			6	11	2	0, 2, 5, 1, 2/0, 0, 0, 1, 0	11	109.1	Uncharacterized protein	Plasmodium falciparum
Q8IFN1	PF3D7_0423500	1000	1000			3	10	2	3, 1, 2, 1, 2/0, 0, 1, 0, 0	10	42.6	Glideosome associated protein with multiple membrane spans 2	Plasmodium falciparum
Q8IHU4	PF3D7_1142100	1000	1000			3	10	2	3, 2, 0, 2, 2/1, 0, 0, 0, 0	10	324.8	J domain-containing protein	Plasmodium falciparum
A0A5K1K988	PF3D7_1351700	1000	1000			5	9	2	1, 3, 1, 2, 2/0, 0, 0, 0, 0	9	151.5	Inner membrane complex protein 1f, putative	Plasmodium falciparum
Q8I3Q6	PF3D7_0520400	1000	1000			3	9	2	1, 3, 2, 0, 2/1, 0, 0, 0, 0	9	35.7	Single-stranded DNA-binding protein, putative	Plasmodium falciparum
Q8IE40	PF3D7_1327800	1000	1000			3	9	2	2, 1, 1, 2, 2/0, 0, 0, 0, 1	9	64	Ribose-phosphate pyrophosphokinase, putative	Plasmodium falciparum
Q8IHR0	PF3D7_1145800	1000	1000			2	7	2	2, 2, 0, 1, 2/0, 0, 0, 0, 0	7	109	Uncharacterized protein	Plasmodium falciparum
	Gene & Synonyms	Ab Nuclear/Control Nuclear								Total peptides in set	MW (kDa)	Description
		Ratio	Log2(Ratio)	Adj. p-value	CV %	Dist. pept. used	Pept. used	Pep. filter	Distrib. dist. pep. in replic.
	PF3D7_0507700	4.54419	2.18402	0.000727874	17.5293	3	18	2	3, 2, 3, 2, 2/2, 0, 2, 0, 2	32	62.6	Nuclear protein localization protein 4, putative
	PF3D7_1206600	1000	1000			6	13	2	2, 3, 3, 3, 2/0, 0, 0, 0, 0	13	167.3	DNA-directed RNA polymerase subunit beta
	PF3D7_1329000	1000	1000			5	13	2	2, 3, 1, 3, 2/1, 1, 0, 0, 0	13	274.8	DNA-directed RNA polymerase subunit

## Sheet: Nuc PfMaf1 not in Cyto PfMaf1
Significant and unique PfMaf1 nuclear proteins not found in significant and unique PfMaf1 cytoplasmic proteins.										Significant and unique PfMaf1 nuclear proteins not found in significant and unique PfMaf1 cytoplasmic proteins.
29 proteins	Gene & Synonyms	Ab Nuclear/Ab Cytoplasm								Total peptides in set	MW (kDa)	Description	Species
		Ratio	Log2(Ratio)	Adj. p-value	CV %	Dist. pept. used	Pept. used	Pep. filter	Distrib. dist. pep. in replic.
Q8I5C6	PF3D7_1229300	3.57373	1.83743	3.28928e-47	4.71799	23	192	17	21, 20, 20, 17, 19/14, 17, 16, 16, 4	262	117.5	Uncharacterized protein	Plasmodium falciparum
Q8IB24	PF08_0054	2.39355	1.25915	1.17484e-45	4.89677	17	195	12	12, 16, 16, 14, 13/12, 14, 14, 15, 14	233	73.9	Heat shock protein 70	Plasmodium falciparum
P19474	TRIM21,RNF81,RO52,SSA1	7.23936	2.85586	2.74135e-31	4.4579	11	80	8	10, 8, 9, 8, 11/4, 6, 4, 7, 7	108	54.2	E3 ubiquitin-protein ligase TRIM21	Homo sapiens
Q8I3K7	PF3D7_0525800	1000	1000			8	51	6	6, 7, 8, 7, 8/2, 2, 2, 2, 2	51	34.3	Inner membrane complex protein 1g, putative	Plasmodium falciparum
O97247	PF3D7_0306800	3.90479	1.96524	7.38599e-18	5.75497	6	42	4	4, 6, 4, 5, 5/3, 5, 3, 4, 3	98	59.2	CCT-beta	Plasmodium falciparum
Q8I490	PF3D7_0501000	5.09623	2.34943	9.51949e-20	4.99564	4	42	3	3, 4, 3, 4, 4/2, 4, 1, 4, 2	46	30.7	Uncharacterized protein	Plasmodium falciparum
Q8I426	PF3D7_0507700	2.4753	1.3076	1.73316e-08	11.7646	5	33	3	5, 3, 5, 3, 4/2, 3, 3, 3, 2	40	62.6	Nuclear protein localization protein 4, putative	Plasmodium falciparum
Q8I3V1	PF3D7_0515700	2.41578	1.27249	2.82798e-09	10.6913	4	32	3	4, 4, 4, 3, 3/3, 4, 3, 2, 2	33	51.8	Glideosome-associated protein 40, putative	Plasmodium falciparum
Q8IEJ0	PF3D7_1301700	1000	1000			4	25	3	3, 3, 3, 3, 4/1, 1, 1, 1, 1	25	28.3	CX3CL1-binding protein 2	Plasmodium falciparum
Q8ILI9	PF3D7_1427500	1000	1000			5	19	3	4, 4, 3, 3, 5/0, 0, 0, 0, 0	19	94.7	DNA mismatch repair protein MSH2, putative	Plasmodium falciparum
Q8IJS1	PF10_0121,PF3D7_1012400	1000	1000			5	16	3	4, 3, 3, 3, 3/0, 0, 0, 0, 0	16	26.4	Hypoxanthine phosphoribosyltransferase	Plasmodium falciparum
Q8IKM6	PF3D7_1460600	2.38329	1.25295	0.000305225	20.3663	3	21	2	1, 2, 3, 3, 2/0, 3, 2, 2, 3	31	17.1	Inner membrane complex sub-compartment protein 3	Plasmodium falciparum
Q8IKS3	PF3D7_1455500	1000	1000			4	18	2	3, 4, 2, 2, 2/1, 1, 1, 1, 1	18	124.2	AP-1 complex subunit gamma, putative	Plasmodium falciparum
Q8IK01	PF3D7_1003600	6.40696	2.67964	9.03443e-08	8.94845	3	18	2	2, 3, 2, 3, 2/0, 2, 1, 2, 1	45	32.7	Inner membrane complex protein 1c, putative	Plasmodium falciparum
Q8IAM2	PF3D7_0802200	2.39514	1.26011	2.87891e-09	7.22239	2	18	2	2, 2, 2, 2, 2/0, 2, 2, 2, 2	21	25.2	1-cys peroxiredoxin	Plasmodium falciparum
Q8ILR6	PF3D7_1418000	2.13582	1.09479	6.90634e-05	16.8669	2	18	2	2, 1, 2, 2, 2/1, 2, 2, 2, 2	29	32.5	Ubiquitin fusion degradation protein 1, putative	Plasmodium falciparum
Q8I2D9	PF3D7_0113900	1000	1000			4	17	2	2, 3, 3, 3, 3/0, 0, 0, 0, 0	17	28.2	CX3CL1-binding protein 1	Plasmodium falciparum
C0H5L9	PF3D7_1370300	10.7695	3.42888	5.95015e-11	4.99732	2	17	2	1, 1, 2, 2, 2/1, 2, 2, 2, 2	29	28.9	Membrane associated histidine-rich protein 1	Plasmodium falciparum
Q8IE49	PF3D7_1329000	1000	1000			5	16	2	2, 3, 1, 3, 2/1, 1, 1, 1, 1	16	274.8	DNA-directed RNA polymerase subunit	Plasmodium falciparum
Q8IM01	PF3D7_1409400	3.59252	1.845	6.21829e-07	10.0169	2	16	2	1, 2, 2, 1, 2/1, 2, 2, 2, 1	20	30.5	Uncharacterized protein	Plasmodium falciparum
O97224	PF3D7_0303400	2.47654	1.30833	0.00203789	23.8629	2	16	2	2, 2, 2, 2, 2/1, 2, 2, 1, 0	20	73.9	Palmitoyltransferase	Plasmodium falciparum
Q8IM26	PF3D7_1406800	4.28283	2.09856	9.18796e-06	12.347	2	15	2	1, 2, 2, 2, 1/2, 1, 2, 1, 1	16	32.9	Glideosome associated protein with multiple membrane spans 3	Plasmodium falciparum
C0H5A5	PF3D7_1308000	1000	1000			6	14	2	4, 2, 4, 2, 1/0, 0, 1, 0, 0	14	100	Uncharacterized protein	Plasmodium falciparum
O00442	RTCA,RPC,RPC1,RTC1,RTCD1	1000	1000			3	13	2	1, 3, 2, 3, 3/0, 0, 0, 0, 1	13	39.3	RNA 3'-terminal phosphate cyclase functions in RNA processing	Homo sapiens
Q8I5X9	PF3D7_1206600	1000	1000			6	13	2	2, 3, 3, 3, 2/0, 0, 0, 0, 0	13	167.3	DNA-directed RNA polymerase subunit beta	Plasmodium falciparum
Q8IK15	PF3D7_1002100	5.14082	2.362	0.000784727	18.1772	2	12	2	1, 1, 2, 2, 2/0, 2, 1, 0, 1	16	69.9	EMP1-trafficking protein	Plasmodium falciparum
A0A5K1K8Y1	PF3D7_1345600	1000	1000			3	11	2	3, 2, 2, 3, 1/0, 0, 0, 0, 0	11	43.2	Inner membrane complex protein	Plasmodium falciparum
A0A5K1K988	PF3D7_1351700	1000	1000			5	9	2	1, 3, 1, 2, 2/0, 0, 0, 0, 0	9	151.5	Inner membrane complex protein 1f, putative	Plasmodium falciparum
Q8IHR0	PF3D7_1145800	1000	1000			2	7	2	2, 2, 0, 1, 2/0, 0, 0, 0, 0	7	109	Uncharacterized protein	Plasmodium falciparum
Biological Process
ID	Name	Bgd count	Result count	Result gene list	Pct of bgd	Fold enrichment	Odds ratio	P-value	Benjamini	Bonferroni
GO:0006383	transcription by RNA polymerase III	12	2	PF3D7_1206600,PF3D7_1329000,	16.7	31.19	40.24	0.00175422444225	0.0735617511633	0.242082973031
GO:0035967	cellular response to topologically incorrect protein	16	2	PF3D7_0818900,PF3D7_1418000,	12.5	23.39	28.72	0.00314785492255	0.0735617511633	0.434403979312
GO:0006168	adenine salvage	1	1	PF3D7_1012400,	100.0	187.12	inf	0.00534429599181	0.0735617511633	0.737512846869
GO:0046083	adenine metabolic process	1	1	PF3D7_1012400,	100.0	187.12	inf	0.00534429599181	0.0735617511633	0.737512846869
GO:0046084	adenine biosynthetic process	1	1	PF3D7_1012400,	100.0	187.12	inf	0.00534429599181	0.0735617511633	0.737512846869
GO:0032263	GMP salvage	1	1	PF3D7_1012400,	100.0	187.12	inf	0.00534429599181	0.0735617511633	0.737512846869
GO:0046098	guanine metabolic process	1	1	PF3D7_1012400,	100.0	187.12	inf	0.00534429599181	0.0735617511633	0.737512846869
GO:0006178	guanine salvage	1	1	PF3D7_1012400,	100.0	187.12	inf	0.00534429599181	0.0735617511633	0.737512846869
GO:0046099	guanine biosynthetic process	1	1	PF3D7_1012400,	100.0	187.12	inf	0.00534429599181	0.0735617511633	0.737512846869
GO:0030433	ubiquitin-dependent ERAD pathway	21	2	PF3D7_0507700,PF3D7_1418000,	9.5	17.82	21.14	0.00541909327475	0.0735617511633	0.747834871916
GO:0036503	ERAD pathway	22	2	PF3D7_0507700,PF3D7_1418000,	9.1	17.01	20.08	0.00594148815061	0.0735617511633	0.819925364784
GO:0034976	response to endoplasmic reticulum stress	27	2	PF3D7_0507700,PF3D7_1418000,	7.4	13.86	16.05	0.00888128452551	0.0735617511633	1.0
GO:0035966	response to topologically incorrect protein	29	2	PF3D7_0818900,PF3D7_1418000,	6.9	12.9	14.85	0.0102059064345	0.0735617511633	1.0
GO:0032264	IMP salvage	2	1	PF3D7_1012400,	50.0	93.56	193.52	0.010661123357	0.0735617511633	1.0
GO:0106380	purine ribonucleotide salvage	2	1	PF3D7_1012400,	50.0	93.56	193.52	0.010661123357	0.0735617511633	1.0
GO:0009113	purine nucleobase biosynthetic process	2	1	PF3D7_1012400,	50.0	93.56	193.52	0.010661123357	0.0735617511633	1.0
GO:0032261	purine nucleotide salvage	2	1	PF3D7_1012400,	50.0	93.56	193.52	0.010661123357	0.0735617511633	1.0
GO:0046100	hypoxanthine metabolic process	2	1	PF3D7_1012400,	50.0	93.56	193.52	0.010661123357	0.0735617511633	1.0
GO:0006144	purine nucleobase metabolic process	2	1	PF3D7_1012400,	50.0	93.56	193.52	0.010661123357	0.0735617511633	1.0
GO:0043096	purine nucleobase salvage	2	1	PF3D7_1012400,	50.0	93.56	193.52	0.010661123357	0.0735617511633	1.0
GO:0006166	purine ribonucleoside salvage	3	1	PF3D7_1012400,	33.3	62.37	96.74	0.0159506176595	0.0815253791487	1.0
GO:0046037	GMP metabolic process	3	1	PF3D7_1012400,	33.3	62.37	96.74	0.0159506176595	0.0815253791487	1.0
GO:0006188	IMP biosynthetic process	3	1	PF3D7_1012400,	33.3	62.37	96.74	0.0159506176595	0.0815253791487	1.0
GO:0043570	maintenance of DNA repeat elements	3	1	PF3D7_1427500,	33.3	62.37	96.74	0.0159506176595	0.0815253791487	1.0
GO:0006177	GMP biosynthetic process	3	1	PF3D7_1012400,	33.3	62.37	96.74	0.0159506176595	0.0815253791487	1.0
GO:0043173	nucleotide salvage	3	1	PF3D7_1012400,	33.3	62.37	96.74	0.0159506176595	0.0815253791487	1.0
GO:0043174	nucleoside salvage	3	1	PF3D7_1012400,	33.3	62.37	96.74	0.0159506176595	0.0815253791487	1.0
GO:0006351	transcription, DNA-templated	38	2	PF3D7_1206600,PF3D7_1329000,	5.3	9.85	11.12	0.0171595642961	0.0845721383165	1.0
GO:0072583	clathrin-dependent endocytosis	4	1	PF3D7_1455500,	25.0	46.78	64.48	0.0212129138218	0.0944316808842	1.0
GO:0045910	negative regulation of DNA recombination	4	1	PF3D7_1427500,	25.0	46.78	64.48	0.0212129138218	0.0944316808842	1.0
GO:0046040	IMP metabolic process	4	1	PF3D7_1012400,	25.0	46.78	64.48	0.0212129138218	0.0944316808842	1.0
GO:0071712	ER-associated misfolded protein catabolic process	5	1	PF3D7_1418000,	20.0	37.42	48.35	0.026448146128	0.107348357814	1.0
GO:0043101	purine-containing compound salvage	5	1	PF3D7_1012400,	20.0	37.42	48.35	0.026448146128	0.107348357814	1.0
GO:0042451	purine nucleoside biosynthetic process	5	1	PF3D7_1012400,	20.0	37.42	48.35	0.026448146128	0.107348357814	1.0
GO:0042278	purine nucleoside metabolic process	6	1	PF3D7_1012400,	16.7	31.19	38.67	0.0316564482273	0.120420589641	1.0
GO:0000018	regulation of DNA recombination	6	1	PF3D7_1427500,	16.7	31.19	38.67	0.0316564482273	0.120420589641	1.0
GO:0043094	cellular metabolic compound salvage	7	1	PF3D7_1012400,	14.3	26.73	32.22	0.036837953135	0.120420589641	1.0
GO:0071218	cellular response to misfolded protein	7	1	PF3D7_1418000,	14.3	26.73	32.22	0.036837953135	0.120420589641	1.0
GO:0006898	receptor-mediated endocytosis	7	1	PF3D7_1455500,	14.3	26.73	32.22	0.036837953135	0.120420589641	1.0
GO:0051788	response to misfolded protein	7	1	PF3D7_1418000,	14.3	26.73	32.22	0.036837953135	0.120420589641	1.0
GO:0046129	purine ribonucleoside biosynthetic process	7	1	PF3D7_1012400,	14.3	26.73	32.22	0.036837953135	0.120420589641	1.0
GO:0034404	nucleobase-containing small molecule biosynthetic process	8	1	PF3D7_1012400,	12.5	23.39	27.61	0.0419927932369	0.120420589641	1.0
GO:0042455	ribonucleoside biosynthetic process	8	1	PF3D7_1012400,	12.5	23.39	27.61	0.0419927932369	0.120420589641	1.0
GO:0009163	nucleoside biosynthetic process	8	1	PF3D7_1012400,	12.5	23.39	27.61	0.0419927932369	0.120420589641	1.0
GO:0009127	purine nucleoside monophosphate biosynthetic process	8	1	PF3D7_1012400,	12.5	23.39	27.61	0.0419927932369	0.120420589641	1.0
GO:0006515	protein quality control for misfolded or incompletely synthesized proteins	8	1	PF3D7_1418000,	12.5	23.39	27.61	0.0419927932369	0.120420589641	1.0
GO:0009112	nucleobase metabolic process	9	1	PF3D7_1012400,	11.1	20.79	24.16	0.0471211002944	0.120420589641	1.0
GO:0009119	ribonucleoside metabolic process	9	1	PF3D7_1012400,	11.1	20.79	24.16	0.0471211002944	0.120420589641	1.0
GO:0042026	protein refolding	9	1	PF3D7_0818900,	11.1	20.79	24.16	0.0471211002944	0.120420589641	1.0
GO:1901659	glycosyl compound biosynthetic process	9	1	PF3D7_1012400,	11.1	20.79	24.16	0.0471211002944	0.120420589641	1.0
GO:0046112	nucleobase biosynthetic process	9	1	PF3D7_1012400,	11.1	20.79	24.16	0.0471211002944	0.120420589641	1.0
GO:0034620	cellular response to unfolded protein	9	1	PF3D7_0818900,	11.1	20.79	24.16	0.0471211002944	0.120420589641	1.0
GO:0009168	purine ribonucleoside monophosphate biosynthetic process	9	1	PF3D7_1012400,	11.1	20.79	24.16	0.0471211002944	0.120420589641	1.0
GO:0009126	purine nucleoside monophosphate metabolic process	9	1	PF3D7_1012400,	11.1	20.79	24.16	0.0471211002944	0.120420589641	1.0

## Sheet: Cyto PfMaf1 Nuc PfMaf1 shared
Shared significant and unique PfMaf1 cytoplasmic and nuclear proteins.
68 proteins	Gene & Synonyms	Ab Nuclear/Ab Cytoplasm								Total peptides in set	MW (kDa)	Description	Species
		Ratio	Log2(Ratio)	Adj. p-value	CV %	Dist. pept. used	Pept. used	Pep. filter	Distrib. dist. pep. in replic.
Q8IIJ8	PF11_0175,PF3D7_1116800	0.675619	-0.565718	2.80779e-33	7.38879	50	464	34	31, 38, 39, 37, 41/34, 44, 40, 45, 42	535	102.9	Heat shock protein 101	Plasmodium falciparum
C6KT34	PFF0940c	1.52338	0.60728	7.03106e-20	9.7377	33	292	23	25, 23, 26, 27, 28/22, 26, 21, 27, 17	342	92.4	Cell division cycle protein 48 homologue, putative	Plasmodium falciparum
Q8I5L6	PFL0930w	1.66838	0.73845	8.88491e-33	6.91217	34	268	23	23, 26, 26, 29, 25/18, 24, 18, 29, 24	334	232.9	Clathrin heavy chain	Plasmodium falciparum
Q8I2X4	PF3D7_0917900	0.716983	-0.479989	1.60399e-08	16.2642	22	249	17	18, 18, 16, 16, 21/19, 20, 17, 18, 22	283	72.4	Heat shock protein 70	Plasmodium falciparum
Q8IHR4	PF3D7_1145400	1.86455	0.89883	9.64342e-21	8.9365	25	186	17	17, 20, 22, 19, 19/14, 16, 17, 16, 15	251	96.4	Dynamin-like protein	Plasmodium falciparum
Q8IJS7	PF10_0115,PF3D7_1011800	0.739428	-0.435519	3.00303e-11	13.4518	26	198	16	17, 16, 18, 18, 19/17, 21, 19, 18, 16	253	131.6	PRE-binding protein	Plasmodium falciparum
P16452	EPB42,E42P	0.673477	-0.5703	3.44274e-08	16.3166	20	165	13	13, 16, 13, 14, 14/14, 12, 15, 15, 18	209	77	Protein 4.2	Homo sapiens
O97313	MAL3P7.35,PFC1020c	0.703849	-0.506661	6.35545e-09	15.4412	18	167	12	13, 14, 13, 12, 15/12, 16, 13, 14, 13	187	30	40S ribosomal protein S3a	Plasmodium falciparum
Q8I0V3	PF3D7_1232100	0.658312	-0.603157	3.25737e-10	13.8984	20	141	12	13, 10, 14, 10, 13/15, 16, 12, 13, 17	186	81.5	60 kDa chaperonin	Plasmodium falciparum
C0H4Y6	PF3D7_0827900	0.632501	-0.660861	4.26957e-13	11.7817	18	141	12	11, 13, 13, 9, 14/12, 13, 13, 16, 16	162	55.5	Protein disulfide-isomerase	Plasmodium falciparum
Q8IKH8	PF14_0627,PF3D7_1465900	0.769492	-0.378022	5.46127e-06	19.8895	14	130	11	11, 11, 10, 12, 11/11, 13, 12, 11, 12	140	24.7	40S ribosomal protein S3	Plasmodium falciparum
A0A5K1K8Y8	PF3D7_1347500	0.871606	-0.198252	0.000654282	27.0307	15	156	10	10, 14, 13, 13, 11/13, 14, 10, 11, 13	186	42.2	DNA/RNA-binding protein Alba 4	Plasmodium falciparum
Q8I431	PF3D7_0507100	0.664804	-0.589	4.53836e-13	11.6017	17	125	10	8, 14, 12, 11, 13/15, 12, 11, 12, 10	147	46.2	60S ribosomal protein L4	Plasmodium falciparum
Q8IIU8	PF11_0065,PF3D7_1105400	1.16837	0.224501	0.000529443	26.3969	12	127	9	9, 9, 10, 11, 9/8, 9, 12, 9, 9	152	29.8	40S ribosomal protein S4	Plasmodium falciparum
Q8II61	PF11_0313,PF3D7_1130200	0.730233	-0.453572	2.01e-09	14.4208	13	118	9	9, 12, 9, 10, 10/13, 12, 12, 9, 10	144	35	60S acidic ribosomal protein P0	Plasmodium falciparum
Q8IKM5	PF14_0579,PF3D7_1460700	0.664442	-0.589785	6.13619e-12	11.9711	11	101	9	9, 9, 9, 9, 9/8, 10, 8, 9, 10	113	16.7	60S ribosomal protein L27	Plasmodium falciparum
Q8I5Y3	PF3D7_1206200	0.796595	-0.328081	4.79555e-06	19.1283	13	85	9	6, 7, 10, 6, 7/9, 9, 9, 11, 11	117	116	Eukaryotic translation initiation factor 3 subunit C	Plasmodium falciparum
Q8I3T1	PF3D7_0517700	0.774985	-0.367759	4.46859e-05	22.2089	13	121	8	11, 10, 12, 8, 11/8, 12, 11, 13, 10	141	84.1	Eukaryotic translation initiation factor 3 subunit B	Plasmodium falciparum
Q8ILL2	PF14_0231,PF3D7_1424400	0.580181	-0.785424	3.07599e-11	12.2222	11	88	8	6, 8, 8, 8, 7/10, 10, 8, 8, 8	103	32.7	60S ribosomal protein L7a	Plasmodium falciparum
Q8IKR1	PF3D7_1456800	0.62115	-0.686985	1.09872e-07	16.009	13	85	8	7, 7, 9, 7, 6/8, 11, 9, 9, 8	98	76.4	H(+)-exporting diphosphatase	Plasmodium falciparum
Q8I3R0	PF3D7_0520000	0.767505	-0.381751	3.84379e-07	17.1602	10	94	7	8, 9, 9, 9, 6/7, 9, 8, 9, 8	109	22.1	40S ribosomal protein S9, putative	Plasmodium falciparum
Q8IBT2	PF3D7_0716800	0.736249	-0.441735	0.000174118	23.8679	11	92	7	6, 7, 8, 8, 6/9, 9, 7, 8, 7	113	37.3	Eukaryotic translation initiation factor 3 subunit I	Plasmodium falciparum
O97239	PFC0245c	1.9343	0.951811	2.35673e-15	9.59899	15	91	7	8, 11, 7, 11, 11/7, 10, 8, 9, 9	126	467.9	Protein dopey homolog PFC0245c	Plasmodium falciparum
O97250	PF3D7_0307200	0.566074	-0.820938	2.37275e-17	8.64295	8	86	6	6, 6, 8, 7, 6/6, 7, 7, 6, 7	96	30.5	60S ribosomal protein L7, putative	Plasmodium falciparum
Q8IDB0	PF3D7_1358800	0.81519	-0.294791	0.000299152	24.6548	7	79	6	6, 6, 7, 6, 7/6, 7, 6, 6, 5	92	17.3	40S ribosomal protein S15	Plasmodium falciparum
Q8IDR9	PF3D7_1342000	0.656292	-0.60759	1.28377e-07	15.9717	11	78	6	5, 6, 6, 6, 8/10, 9, 7, 6, 10	98	35.4	40S ribosomal protein S6	Plasmodium falciparum
Q8I2X3	PF3D7_0918000	1.72087	0.783139	2.02897e-12	10.9065	8	73	6	7, 6, 6, 7, 6/5, 8, 6, 6, 7	89	44.6	Acid phosphatase	Plasmodium falciparum
O77395	PF3D7_0316800	1.43244	0.518472	1.45965e-06	17.9595	8	79	5	6, 5, 6, 8, 5/6, 5, 6, 7, 7	85	14.9	40S ribosomal protein S15A, putative	Plasmodium falciparum
Q8I1S2	PF3D7_0416500	1.20583	0.270022	0.023787	40.1504	6	71	5	6, 6, 6, 6, 5/6, 6, 3, 6, 3	82	46.5	Repressor of RNA polymerase III transcription MAF1	Plasmodium falciparum
Q8IET7	PF3D7_1302800	0.852638	-0.229995	0.00531601	32.3199	9	70	5	9, 7, 6, 5, 7/8, 9, 5, 8, 6	87	22.5	40S ribosomal protein S7	Plasmodium falciparum
Q8II73	PF3D7_1129000	0.528267	-0.92066	9.55913e-13	10.5433	8	70	5	4, 6, 5, 7, 8/8, 5, 5, 6, 7	83	36.6	Spermidine synthase	Plasmodium falciparum
Q8IJN7	ENO,PF10_0155	1.74216	0.800874	5.273e-08	14.9981	11	67	5	6, 5, 10, 6, 9/5, 9, 7, 6, 4	83	48.7	Enolase	Plasmodium falciparum
Q8IM10	PF14_0083,PF3D7_1408600	0.802694	-0.317078	8.4626e-07	17.1605	6	67	5	5, 5, 5, 6, 6/5, 6, 5, 5, 6	77	25.1	40S ribosomal protein S8	Plasmodium falciparum
Q8IDS6	PF3D7_1341200	0.85269	-0.229906	0.00493241	31.8545	7	64	5	5, 5, 7, 5, 6/4, 6, 3, 6, 6	70	21.7	60S ribosomal protein L18a	Plasmodium falciparum
Q8IKJ1	PF3D7_1464600	0.65331	-0.61416	7.89293e-07	16.9284	9	64	5	6, 7, 9, 4, 5/5, 8, 7, 7, 6	90	170.5	Serine/threonine protein phosphatase UIS2, putative	Plasmodium falciparum
Q8IL02	PF14_0448,PF3D7_1447000	0.722693	-0.468545	8.39768e-07	16.8974	7	61	5	5, 6, 7, 7, 5/5, 6, 5, 6, 7	86	30	40S ribosomal protein S5	Plasmodium falciparum
Q8IFP2	PF3D7_0422400	0.636021	-0.652853	3.41916e-06	18.4171	9	70	4	4, 5, 6, 6, 5/2, 8, 8, 7, 7	86	19.7	40S ribosomal protein S19	Plasmodium falciparum
C0H4V6	PF3D7_0818200	1.84979	0.887362	4.69322e-14	8.98359	7	58	4	4, 4, 7, 2, 4/5, 4, 4, 7, 4	72	30.2	14-3-3 protein I	Plasmodium falciparum
Q8I608	PF3D7_1203700	0.579938	-0.786029	9.13645e-11	11.2154	9	56	4	3, 5, 5, 4, 5/4, 4, 4, 8, 5	67	40.5	Nucleosome assembly protein	Plasmodium falciparum
Q8IEC8	PF3D7_1318800	0.536157	-0.899274	6.73197e-09	13.0688	7	52	4	2, 4, 6, 4, 3/4, 5, 5, 7, 5	63	75.9	Translocation protein SEC63, putative	Plasmodium falciparum
Q8IBQ5	PF3D7_0719700	1.29725	0.375462	0.0004912	24.798	5	49	4	5, 4, 5, 4, 5/5, 5, 4, 5, 4	56	16.5	40S ribosomal protein S10, putative	Plasmodium falciparum
Q8IJC6	PF10_0272,PF3D7_1027800	0.633726	-0.658069	1.45648e-06	16.6659	6	48	4	5, 4, 5, 4, 6/5, 4, 4, 4, 5	53	44.2	60S ribosomal protein L3	Plasmodium falciparum
Q8I3R6	PF3D7_0519400	0.561118	-0.833624	1.41227e-06	16.5556	7	48	4	3, 5, 5, 5, 5/4, 4, 4, 5, 5	50	15.4	40S ribosomal protein S24	Plasmodium falciparum
O77381	PF3D7_0317600	0.826296	-0.275269	0.00671315	32.4333	5	43	4	5, 4, 5, 4, 5/5, 5, 4, 2, 4	53	18.8	40S ribosomal protein S11, putative	Plasmodium falciparum
P20073	ANXA7,ANX7,SNX,OK/SW-cl.95	0.511699	-0.966634	3.77633e-08	13.4804	5	42	4	3, 5, 5, 2, 3/5, 4, 5, 5, 5	48	52.7	Annexin A7	Homo sapiens
Q8ILT5	PF14_0159	0.532515	-0.909105	1.25647e-08	12.3328	7	40	4	2, 2, 3, 3, 3/6, 7, 4, 4, 6	58	110.6	Protein SEY1 homolog	Plasmodium falciparum
C0H4U4	PF3D7_0813300	1.44188	0.527955	0.000624566	25.4096	5	52	3	3, 4, 5, 5, 3/3, 4, 3, 4, 3	63	36.3	NPL domain-containing protein	Plasmodium falciparum
Q8IJZ7	PF10_0043,PF3D7_1004000	0.606918	-0.720426	5.37329e-05	20.4738	6	43	3	3, 5, 4, 4, 5/4, 5, 5, 3, 5	50	23.8	60S ribosomal protein L13, putative	Plasmodium falciparum
Q8IB03	PF3D7_0816600	0.618039	-0.69423	0.00200929	27.7188	9	42	3	1, 6, 7, 5, 3/3, 6, 3, 4, 4	69	122.5	Chaperone protein ClpB1	Plasmodium falciparum
O75340	PDCD6,ALG2	0.680355	-0.555641	7.29724e-07	15.5927	5	41	3	4, 5, 3, 5, 2/3, 5, 4, 5, 5	49	21.9	Programmed cell death protein 6	Homo sapiens
Q8IL58	PF3D7_1441200	0.52053	-0.941946	8.86605e-11	9.40378	5	36	3	4, 2, 3, 4, 3/4, 3, 3, 4, 3	50	24.8	60S ribosomal protein L1, putative	Plasmodium falciparum
Q8I2G1	PF3D7_0935900	1.97568	0.98235	1.98221e-06	15.659	5	34	3	3, 4, 4, 2, 5/3, 3, 4, 5, 1	53	83	Ring-exported protein 1	Plasmodium falciparum
Q8I546	PF3D7_1237700	0.588176	-0.765681	1.44143e-07	13.3828	4	34	3	3, 2, 2, 3, 2/3, 4, 3, 3, 4	43	23.7	DUF4149 domain-containing protein	Plasmodium falciparum
Q8IE85	PF3D7_1323100	0.750438	-0.414196	0.000415448	22.9805	5	32	3	3, 4, 1, 3, 1/5, 4, 4, 4, 3	42	21.6	60S ribosomal protein L6, putative	Plasmodium falciparum
C0H5J5	PF3D7_1360900.1	0.631834	-0.662382	0.00165765	26.3919	5	31	3	3, 3, 3, 3, 3/3, 4, 3, 3, 3	38	44.8	RNA-binding protein, putative	Plasmodium falciparum
Q8IBQ6	PF3D7_0719600	0.717023	-0.479908	2.97312e-05	18.3222	3	30	3	3, 3, 3, 3, 1/3, 3, 3, 2, 2	38	20.2	60S ribosomal protein L11a, putative	Plasmodium falciparum
Q8IEM3	PF3D7_1309100	0.747022	-0.420777	8.03226e-06	16.6571	3	29	3	2, 3, 3, 3, 3/3, 3, 3, 3, 3	39	19.2	60S ribosomal protein L24, putative	Plasmodium falciparum
Q8IFP5	PF3D7_0422100	0.588213	-0.76559	0.000415448	22.1097	5	27	3	2, 4, 2, 1, 1/4, 3, 3, 4, 3	34	44.9	Transmembrane emp24 domain-containing protein, putative	Plasmodium falciparum
C0H570	PF3D7_0929200	1.37773	0.462291	0.000489909	23.6441	5	35	2	2, 4, 5, 3, 4/2, 4, 2, 3, 4	47	33.6	RNA-binding protein, putative	Plasmodium falciparum
Q8IK02	PF3D7_1003500	1.62611	0.701424	2.21018e-06	15.2669	2	29	2	2, 2, 2, 2, 2/2, 2, 2, 2, 2	30	13.5	40S ribosomal protein S20e, putative	Plasmodium falciparum
O97248	PF3D7_0306900	0.670671	-0.576322	4.10272e-06	15.7156	2	28	2	2, 1, 2, 2, 2/2, 2, 2, 2, 1	30	16.1	40S ribosomal protein S23, putative	Plasmodium falciparum
Q8I2W2	PF3D7_0919100	0.556945	-0.844392	0.000247498	21.2244	3	27	2	2, 1, 2, 2, 1/2, 3, 3, 2, 2	36	43.3	DnaJ protein, putative	Plasmodium falciparum
C0H4K8	PF3D7_0705700	1.65932	0.73059	7.82838e-06	15.5237	3	24	2	2, 2, 2, 3, 1/2, 3, 3, 3, 3	27	6.4	40S ribosomal protein S29, putative	Plasmodium falciparum
Q8IBZ9	CG10,MAL7P1.27	0.582634	-0.779339	0.000325961	21.0974	3	23	2	2, 3, 2, 2, 2/2, 2, 3, 3, 2	28	48.7	Putative chloroquine resistance transporter	Plasmodium falciparum
Q8I6T2	PF3D7_1345700	0.550345	-0.861593	0.000781295	22.6395	5	23	2	1, 4, 3, 2, 0/1, 4, 3, 3, 2	29	53.6	Isocitrate dehydrogenase [NADP]	Plasmodium falciparum
Q8I570	PF3D7_1235200	1.83697	0.877327	0.000369834	20.7856	3	21	2	2, 2, 3, 2, 2/2, 2, 3, 2, 1	34	117.1	H(+)-exporting diphosphatase	Plasmodium falciparum
P04632	CAPNS1,CAPN4,CAPNS	1.83836	0.87842	0.00615359	28.9252	3	19	2	2, 2, 2, 3, 2/2, 1, 0, 3, 2	26	28.3	Calpain small subunit 1	Homo sapiens
Q8IBY4	PF3D7_0710600	0.611759	-0.708964	7.18557e-06	12.0293	2	15	2	2, 1, 0, 1, 2/2, 2, 1, 2, 2	19	17.4	60S ribosomal protein L34	Plasmodium falciparum
