# Supplementary material for: RNA polymerase III is involved in regulating Plasmodium falciparum virulence
Source: eLife. 2024 Jun 26;13:RP95879. doi: 10.7554/eLife.95879 (PMC11208047; doi:10.7554/eLife.95879)
Supplement: Supplementary file 2. — Age and sex are indicated for each sample as well as the month each sample was from. Green highlight shows magnesium concentration and purple highlight shows which samples were also used for reverse transcription-quantitative PCR (RT-qPCR) analysis in Figure 1. [file elife-95879-supp2.xlsx]

## Sheet: Supplementary File 2
Individual / Sample:	December	January	February	March	April	May	June	July	August	September	October	November
1
qPCR		+
Magnesium nmol/uL		1.12667
Age: 11
Sex: Male
		Dry Asymptomatic
2
qPCR
Magnesium nmol/uL		1.20392	0.979916	1.08548	1.02884
Age: 12
Sex: Female
		Dry Asymptomatic
3
qPCR		+			+
Magnesium nmol/uL		0.98764	0.982491	1.01854	1.18332
Age: 15
Sex: Female
		Dry Asymptomatic
4
qPCR	+		+		+
Magnesium nmol/uL			1.20649	1.13697	1.30433	1.16787
Age: 9
Sex: Male
			Dry Asymptomatic
5
qPCR				+
Magnesium nmol/uL		1.23996		1.23481	1.21164
Age: 10
Sex: Male
		Dry Asymptomatic
6
qPCR											+
Magnesium nmol/uL											0.77394
Age: 10
Sex: Male
											Wet symptomatic:
7
qPCR												+
Magnesium nmol/uL												0.763641
Age: 16
Sex: Female
												Wet symptomatic:
8
qPCR												+
Magnesium nmol/uL												0.853756
Age: 8
Sex: Male
												Wet symptomatic:
9
qPCR												+
Magnesium nmol/uL												0.964468
Age: 28
Sex: Male
												Wet symptomatic:
10
qPCR												+
Magnesium nmol/uL												0.918123
Age: 11
Sex: Male
												Wet symptomatic:
11
qPCR												+
Magnesium nmol/uL												0.52162
Age: 37
Sex: Female
												Wet symptomatic:
12
qPCR
Magnesium nmol/uL												0.73017
Age: 12
Sex: Female
												Wet symptomatic:
13
qPCR												+
Magnesium nmol/uL
Age: 52
Sex: Female
												Wet symptomatic:
14
qPCR												+
Magnesium nmol/uL
Age: 22
Sex: Female
												Wet symptomatic:
15
qPCR												+
Magnesium nmol/uL
Age: 10
Sex: Male
												Wet symptomatic:
16
qPCR												+
Magnesium nmol/uL
Age: 41
Sex: Male
												Wet symptomatic:
17
qPCR												+
Magnesium nmol/uL
Age: 49
Sex: Female
												Wet symptomatic:
18
qPCR												+
Magnesium nmol/uL
Age: 64
Sex: Female
												Wet symptomatic:
19
qPCR												+
Magnesium nmol/uL
Age: 54
Sex: Female
												Wet symptomatic:
20
qPCR												+
Magnesium nmol/uL
Age: 22
Sex: Female
												Wet symptomatic:
